# Supplementary material
Source: Research Square preprint supplement (doi:10.21203/rs.3.rs-9012371/v1)
Supplement: Supplementary file 2 [file f8f44c8b21abefe379b28b6b.xlsx]

## Sheet: Table S1
Table S1. Genomes' associated metadata
genome_id	NCBI	BioSample	Bioproject	DOI
PaGeD_00001	GCA_000172975.1	SAMN02441810	PRJNA20741	doi.org/10.4056/sigs.1092865
PaGeD_00002	GCA_000213255.1	SAMN02232034	PRJNA42243	doi.org/10.4056/sigs.1864526
PaGeD_00003	GCA_000233775.1	SAMN02232060	PRJNA33163	doi.org/10.4056/sigs.2726028
PaGeD_00004	GOLD: Gp0011525	JGI: 2506520025	NA	Unpublished
PaGeD_00005	GCA_000510285.1	SAMN02641476	PRJNA231107	Unpublished
PaGeD_00006	GCA_000510325.1	SAMN02641477	PRJNA231108	Unpublished
PaGeD_00007	GCA_000511305.1	SAMN02641478	PRJNA231235	Unpublished
PaGeD_00008	GOLD: Gp0021722	JGI: 2516653088	NA	Unpublished
PaGeD_00009	GCA_000789375.1	SAMN03143096	PRJNA86989	Unpublished
PaGeD_00010	GCA_000784795.1	SAMN03143097	PRJNA174583	doi.org/10.1038/ismej.2014.238
PaGeD_00011	GCA_000784825.1	SAMN03143098	PRJNA175707	doi.org/10.1038/ismej.2014.238
PaGeD_00012	GOLD: Gp0024859	JGI: 2518285546	NA	Unpublished
PaGeD_00013	GOLD: Gp0024859	JGI: 2518285547	NA	Unpublished
PaGeD_00014	GCA_000374645.1	SAMN02441700	PRJNA174985	Unpublished
PaGeD_00015	GOLD: Gp0035556	JGI: 2522572039	NA	Unpublished
PaGeD_00016	GCA_000420485.1	SAMN02441247	PRJNA185535	Unpublished
PaGeD_00017	GCA_000421525.1	SAMN02440892	PRJNA188800	Unpublished
PaGeD_00018	GCA_000421605.1	SAMN02441582	PRJNA188822	Unpublished
PaGeD_00019	GCA_000425865.1	SAMN02440849	PRJNA188919	Unpublished
PaGeD_00020	GCA_000482745.1	SAMN02441442	PRJNA188879	Unpublished
PaGeD_00021	GCA_000518425.1	SAMN02584983	PRJNA213761	Unpublished
PaGeD_00022	GCA_000518445.1	SAMN02584982	PRJNA213750	Unpublished
PaGeD_00023	GCA_000518325.1	SAMN02584988	PRJNA213795	Unpublished
PaGeD_00024	GCA_000518385.1	SAMN02584985	PRJNA213775	Unpublished
PaGeD_00025	GCA_000518405.1	SAMN02584984	PRJNA213772	Unpublished
PaGeD_00026	GCA_000620585.1	SAMN02743942	PRJNA213765	Unpublished
PaGeD_00027	GCA_000620745.1	SAMN02743961	PRJNA213796	Unpublished
PaGeD_00028	GCA_000620505.1	SAMN02743952	PRJNA213755	Unpublished
PaGeD_00029	GCA_000620605.1	SAMN02743941	PRJNA213768	Unpublished
PaGeD_00030	GCA_000621345.1	SAMN02743994	PRJNA221066	Unpublished
PaGeD_00031	GCA_000504105.1	SAMD00061031	PRJDB362	doi.org/10.1099/ijs.0.060137-0.
PaGeD_00032	GCA_000686645.1	SAMN02743376	PRJNA234877	Unpublished
PaGeD_00033	GCA_000711905.1	SAMN02746094	PRJNA235052	Unpublished
PaGeD_00034	GCA_000711815.1	SAMN02745783	PRJNA234847	Unpublished
PaGeD_00035	GCA_000712155.1	SAMN02744692	PRJNA213769	Unpublished
PaGeD_00036	GCA_900167305.1	SAMN02745973	PRJEB19568	Unpublished
PaGeD_00037	GCA_900167125.1	SAMN02745704	PRJEB19582	Unpublished
PaGeD_00038	GCA_000474175.1	SAMD00011324	PRJDB1457	doi.org/10.1128/AEM.01129-13
PaGeD_00039	GCA_000711245.1	SAMN02744757	PRJNA225849	Unpublished
PaGeD_00040	GCA_000733765.1	SAMN02744755	PRJNA225851	Unpublished
PaGeD_00041	GCA_000733925.1	SAMN02744759	PRJNA225843	Unpublished
PaGeD_00042	GCA_000744695.1	SAMN02744761	PRJNA225842	Unpublished
PaGeD_00043	GCA_000744735.1	SAMN02744760	PRJNA225848	Unpublished
PaGeD_00044	GCA_000681355.1	SAMN02719768	PRJNA243645	Unpublished
PaGeD_00045	GCA_000744325.1	SAMN02744769	PRJNA225847	Unpublished
PaGeD_00046	GCA_000744395.1	SAMN02744764	PRJNA225846	Unpublished
PaGeD_00047	GCA_000744955.1	SAMN02744758	PRJNA225853	Unpublished
PaGeD_00048	GCA_900129305.1	SAMN02745206	PRJEB18182	Unpublished
PaGeD_00049	GCA_000827125.1	SAMN03096814	PRJNA263118	doi.org/10.1099/ijs.0.001537-0.
PaGeD_00050	GOLD: Gp0034104	JGI: 2599185294	NA	Unpublished
PaGeD_00051	GCA_000747625.1	SAMN02768836	PRJNA246614	Unpublished
PaGeD_00052	GCA_000960465.1	SAMN03353333	PRJNA275795	Unpublished
PaGeD_00053	GOLD: Gp0134134	JGI: 2651870327	NA	Unpublished
PaGeD_00054	GCA_000960475.1	SAMN03353335	PRJNA275798	Unpublished
PaGeD_00055	GCA_001717015.1	SAMN04994461	PRJNA321438	Unpublished
PaGeD_00056	GCA_001717025.1	SAMN04994460	PRJNA321438	Unpublished
PaGeD_00057	GCA_001717085.1	SAMN04994464	PRJNA321438	Unpublished
PaGeD_00058	GCA_001717005.1	SAMN04994458	PRJNA321438	Unpublished
PaGeD_00059	GCA_001717035.1	SAMN04994459	PRJNA321438	Unpublished
PaGeD_00060	GCA_001896025.1	SAMN06092843	PRJNA355632	Unpublished
PaGeD_00061	GCA_002024545.1	SAMN06190351	PRJNA359364	doi.org/10.1093/femsle/fnx248
PaGeD_00062	GCA_001469845.1	SAMN04272329	PRJNA302347	Unpublished
PaGeD_00063	GOLD: Gp0207637	JGI: 2731639223	NA	Unpublished
PaGeD_00064	GCA_001552475.1	SAMD00046492	PRJDB453	Unpublished
PaGeD_00065	GOLD: Gp0209529	JGI: 2734482291	NA	Unpublished
PaGeD_00066	GCA_900217795.1	SAMN05880501	PRJEB22297	Unpublished
PaGeD_00067	GCA_000475315.1	SAMN02345638	PRJNA217943	Unpublished
PaGeD_00068	GCA_002504085.1	SAMN04510769	PRJNA312968	Unpublished
PaGeD_00069	GOLD: Gp0251909	JGI: 2756170166	NA	Unpublished
PaGeD_00070	GOLD: Gp0251954	JGI: 2756170248	NA	Unpublished
PaGeD_00071	GOLD: Gp0251910	JGI: 2757320361	NA	Unpublished
PaGeD_00072	GCA_002269275.1	SAMN07503201	PRJNA398181	Unpublished
PaGeD_00073	GOLD: Gp0266039	JGI: 2770939442	NA	Unpublished
PaGeD_00074	GCA_002028405.1	SAMN06197299	PRJNA359731	Unpublished
PaGeD_00075	GOLD: Gp0307586	JGI: 2778260950	NA	Unpublished
PaGeD_00076	GOLD: Gp0324998	JGI: 2791354853	NA	Unpublished
PaGeD_00077	GOLD: Gp0324998	JGI: 2795385393	NA	Unpublished
PaGeD_00078	GOLD: Gp0324998	JGI: 2799112206	NA	Unpublished
PaGeD_00079	GOLD: Gp0325692	JGI: 2802428857	NA	Unpublished
PaGeD_00080	GCA_000836695.1	SAMN03329042	PRJNA183669	Unpublished
PaGeD_00081	GCA_002026335.1	SAMN06190353	PRJNA359364	doi.org/10.1093/femsle/fnx248
PaGeD_00082	GOLD: Gp0401001	JGI: 2828614168	NA	Unpublished
PaGeD_00083	GCA_003012935.1	SAMN08278417	PRJNA428430	Unpublished
PaGeD_00084	GOLD: Gp0456565	JGI: 2844586914	NA	Unpublished
PaGeD_00085	GCA_003970795.1	SAMN10531474	PRJNA508824	Unpublished
PaGeD_00086	GCA_011742165.1	SAMN14371620	PRJNA612408	Unpublished
PaGeD_00087	GOLD: Gp0612113	JGI: 2939866076	NA	Unpublished
PaGeD_00088	GCA_026069995.1	SAMN31536933	PRJNA896197	Unpublished
PaGeD_00089	GCA_002116985.1	SAMN04916454	PRJNA320095	Unpublished
PaGeD_00090	GCA_002117045.1	SAMN04916456	PRJNA320097	Unpublished
PaGeD_00091	GCA_002924625.1	SAMN03351355	PRJNA233612	Unpublished
PaGeD_00092	GCA_002895525.1	SAMN07817523	PRJNA230894	Unpublished
PaGeD_00093	GCA_013697085.1	SAMN15567435	PRJNA612408	Unpublished
PaGeD_00094	GOLD: Gp0697414	JGI: 2998784146	NA	Unpublished
PaGeD_00095	GCA_002116945.1	SAMN04916455	PRJNA320096	Unpublished
PaGeD_00096	GCA_001593625.1	SAMN04532508	PRJNA313000	Unpublished
PaGeD_00097	GCA_000012665.1	SAMN02598492	PRJNA329	doi.org/10.1128/JB.05400-11
PaGeD_00098	GCA_000015365.1	SAMN02598294	PRJNA13239	Unpublished
PaGeD_00099	GCA_000013065.1	SAMN02603603	PRJNA16220	doi.org/10.1128/JB.01629-08
PaGeD_00100	GCA_000025725.1	SAMN02598464	PRJNA29431	Unpublished
PaGeD_00101	GCA_000209655.1	SAMN02603906	PRJNA65659	doi.org/10.1128/JB.05242-11
PaGeD_00102	GCA_029633915.1	SAMN25047802	PRJNA798152	Unpublished
PaGeD_00103	NA	NA	NA	doi.org/10.1111/1462-2920.16251
PaGeD_00104	GCA_000009365.1	SAMEA3138202	PRJNA13005	doi.org/10.1038/nbt1232
PaGeD_00105	GCA_000475175.1	SAMN02345633	PRJNA217943	doi.org/10.1128/genomeA.01015-13
PaGeD_00106	GCA_000475255.1	SAMN02345631	PRJNA217943	doi.org/10.1128/genomeA.01015-13
PaGeD_00107	GCA_000475275.1	SAMN02345634	PRJNA217943	doi.org/10.1128/genomeA.01015-13
PaGeD_00108	GCA_000475295.1	SAMN02345635	PRJNA217943	doi.org/10.1128/genomeA.01015-13
PaGeD_00109	GCA_000475315.1	SAMN02345638	PRJNA217943	doi.org/10.1128/genomeA.01015-13
PaGeD_00110	GCA_000475335.1	SAMN02345639	PRJNA217943	doi.org/10.1128/genomeA.01015-13
PaGeD_00111	GCA_000475355.1	SAMN02345632	PRJNA217943	doi.org/10.1128/genomeA.01015-13
PaGeD_00112	GCA_000475375.1	SAMN02345637	PRJNA217943	doi.org/10.1128/genomeA.01015-13
PaGeD_00113	GCA_000475395.1	SAMN02345641	PRJNA217943	doi.org/10.1128/genomeA.01015-13
PaGeD_00114	GCA_000475415.1	SAMN02345636	PRJNA217943	doi.org/10.1128/genomeA.01015-13
PaGeD_00115	GCA_001507855.1	SAMN03445111	PRJNA278302	doi.org/10.1128/mBio.01669-15
PaGeD_00116	GCA_001507915.1	SAMN03445116	PRJNA278302	doi.org/10.1128/mBio.01669-15
PaGeD_00117	GCA_001507935.1	SAMN03445118	PRJNA278302	doi.org/10.1128/mBio.01669-15
PaGeD_00118	GCA_001507955.1	SAMN03445119	PRJNA278302	doi.org/10.1128/mBio.01669-15
PaGeD_00119	GCA_001507975.1	SAMN03445121	PRJNA278302	doi.org/10.1128/mBio.01669-15
PaGeD_00120	GCA_001507995.1	SAMN03445124	PRJNA278302	doi.org/10.1128/mBio.01669-15
PaGeD_00121	GCA_001508005.1	SAMN03445125	PRJNA278302	doi.org/10.1128/mBio.01669-15
PaGeD_00122	GCA_001508035.1	SAMN03445126	PRJNA278302	doi.org/10.1128/mBio.01669-15
PaGeD_00123	GCA_001508055.1	SAMN03445128	PRJNA278302	doi.org/10.1128/mBio.01669-15
PaGeD_00124	GCA_001508065.1	SAMN03445129	PRJNA278302	doi.org/10.1128/mBio.01669-15
PaGeD_00125	GCA_001508095.1	SAMN03445130	PRJNA278302	doi.org/10.1128/mBio.01669-15
PaGeD_00126	GCA_001508115.1	SAMN03445131	PRJNA278302	doi.org/10.1128/mBio.01669-15
PaGeD_00127	GCA_001508125.1	SAMN03445132	PRJNA278302	doi.org/10.1128/mBio.01669-15
PaGeD_00128	GCA_001508155.1	SAMN03445135	PRJNA278302	doi.org/10.1128/mBio.01669-15
PaGeD_00129	GCA_001508175.1	SAMN03445136	PRJNA278302	doi.org/10.1128/mBio.01669-15
PaGeD_00130	GCA_001508185.1	SAMN03445137	PRJNA278302	doi.org/10.1128/mBio.01669-15
PaGeD_00131	GCA_001508215.1	SAMN03445141	PRJNA278302	doi.org/10.1128/mBio.01669-15
PaGeD_00132	GCA_001508235.1	SAMN03445144	PRJNA278302	doi.org/10.1128/mBio.01669-15
PaGeD_00133	GCA_001508275.1	SAMN03445149	PRJNA278302	doi.org/10.1128/mBio.01669-15
PaGeD_00134	GCA_001508295.1	SAMN03445133	PRJNA278302	doi.org/10.1128/mBio.01669-15
PaGeD_00135	GCA_001508335.1	SAMN03445151	PRJNA278302	doi.org/10.1128/mBio.01669-15
PaGeD_00136	GCA_001508355.1	SAMN03445152	PRJNA278302	doi.org/10.1128/mBio.01669-15
PaGeD_00137	GCA_001508375.1	SAMN03445153	PRJNA278302	doi.org/10.1128/mBio.01669-15
PaGeD_00138	GCA_001508395.1	SAMN03445155	PRJNA278302	doi.org/10.1128/mBio.01669-15
PaGeD_00139	GCA_001508435.1	SAMN03445161	PRJNA278302	doi.org/10.1128/mBio.01669-15
PaGeD_00140	GCA_001508455.1	SAMN03445163	PRJNA278302	doi.org/10.1128/mBio.01669-15
PaGeD_00141	GCA_001508475.1	SAMN03445164	PRJNA278302	doi.org/10.1128/mBio.01669-15
PaGeD_00142	GCA_001508485.1	SAMN03445167	PRJNA278302	doi.org/10.1128/mBio.01669-15
PaGeD_00143	GCA_001508515.1	SAMN03445169	PRJNA278302	doi.org/10.1128/mBio.01669-15
PaGeD_00144	GCA_001508535.1	SAMN03445170	PRJNA278302	doi.org/10.1128/mBio.01669-15
PaGeD_00145	GCA_001508575.1	SAMN03445178	PRJNA278302	doi.org/10.1128/mBio.01669-15
PaGeD_00146	GCA_001508595.1	SAMN03445181	PRJNA278302	doi.org/10.1128/mBio.01669-15
PaGeD_00147	GCA_001508615.1	SAMN03445182	PRJNA278302	doi.org/10.1128/mBio.01669-15
PaGeD_00148	GCA_001508665.1	SAMN03445185	PRJNA278302	doi.org/10.1128/mBio.01669-15
PaGeD_00149	GCA_001508735.1	SAMN03445112	PRJNA278302	doi.org/10.1128/mBio.01669-15
PaGeD_00150	GCA_001508745.1	SAMN03445115	PRJNA278302	doi.org/10.1128/mBio.01669-15
PaGeD_00151	GCA_001508775.1	SAMN03445117	PRJNA278302	doi.org/10.1128/mBio.01669-15
PaGeD_00152	GCA_001508795.1	SAMN03445120	PRJNA278302	doi.org/10.1128/mBio.01669-15
PaGeD_00153	GCA_001508815.1	SAMN03445123	PRJNA278302	doi.org/10.1128/mBio.01669-15
PaGeD_00154	GCA_001508835.1	SAMN03445127	PRJNA278302	doi.org/10.1128/mBio.01669-15
PaGeD_00155	GCA_001508855.1	SAMN03445138	PRJNA278302	doi.org/10.1128/mBio.01669-15
PaGeD_00156	GCA_001508875.1	SAMN03445139	PRJNA278302	doi.org/10.1128/mBio.01669-15
PaGeD_00157	GCA_001508895.1	SAMN03445140	PRJNA278302	doi.org/10.1128/mBio.01669-15
PaGeD_00158	GCA_001508915.1	SAMN03445142	PRJNA278302	doi.org/10.1128/mBio.01669-15
PaGeD_00159	GCA_001508935.1	SAMN03445143	PRJNA278302	doi.org/10.1128/mBio.01669-15
PaGeD_00160	GCA_001508975.1	SAMN03445158	PRJNA278302	doi.org/10.1128/mBio.01669-15
PaGeD_00161	GCA_001508995.1	SAMN03445159	PRJNA278302	doi.org/10.1128/mBio.01669-15
PaGeD_00162	GCA_001509005.1	SAMN03445165	PRJNA278302	doi.org/10.1128/mBio.01669-15
PaGeD_00163	GCA_001509055.1	SAMN03445173	PRJNA278302	doi.org/10.1128/mBio.01669-15
PaGeD_00164	GCA_001509095.1	SAMN03445176	PRJNA278302	doi.org/10.1128/mBio.01669-15
PaGeD_00165	GCA_001509115.1	SAMN03445177	PRJNA278302	doi.org/10.1128/mBio.01669-15
PaGeD_00166	GCA_001509135.1	SAMN03445180	PRJNA278302	doi.org/10.1128/mBio.01669-15
PaGeD_00167	GCA_001509155.1	SAMN03445187	PRJNA278302	doi.org/10.1128/mBio.01669-15
PaGeD_00168	GCA_001509175.1	SAMN03445188	PRJNA278302	doi.org/10.1128/mBio.01669-15
PaGeD_00169	GCA_001509255.1	SAMN03445157	PRJNA278302	doi.org/10.1128/mBio.01669-15
PaGeD_00170	GCA_001509275.1	SAMN03445156	PRJNA278302	doi.org/10.1128/mBio.01669-15
PaGeD_00171	GCA_001509285.1	SAMN03445154	PRJNA278302	doi.org/10.1128/mBio.01669-15
PaGeD_00172	GCA_001509335.1	SAMN03445179	PRJNA278302	doi.org/10.1128/mBio.01669-15
PaGeD_00173	GCA_001509345.1	SAMN03445166	PRJNA278302	doi.org/10.1128/mBio.01669-15
PaGeD_00174	GCA_001509375.1	SAMN03445147	PRJNA278302	doi.org/10.1128/mBio.01669-15
PaGeD_00175	GCA_001509385.1	SAMN03445171	PRJNA278302	doi.org/10.1128/mBio.01669-15
PaGeD_00176	GCA_001566785.1	SAMN04458021	PRJNA301966	doi.org/10.1038/ismej.2013.98
PaGeD_00177	GCA_001566805.1	SAMN04458017	PRJNA301966	doi.org/10.1038/ismej.2013.98
PaGeD_00178	GCA_001566815.1	SAMN04458015	PRJNA301966	doi.org/10.1038/ismej.2013.98
PaGeD_00179	GCA_001566825.1	SAMN04458025	PRJNA301966	doi.org/10.1038/ismej.2013.98
PaGeD_00180	GCA_001566885.1	SAMN04458024	PRJNA301966	doi.org/10.1038/ismej.2013.98
PaGeD_00181	GCA_001566895.1	SAMN04458762	PRJNA301966	doi.org/10.1038/ismej.2013.98
PaGeD_00182	GCA_001577545.1	SAMN04417677	PRJNA308326	doi.org/10.1038/nmicrobiol.2016.146
PaGeD_00183	GCA_001577555.1	SAMN04432769	PRJNA308326	doi.org/10.1038/nmicrobiol.2016.146
PaGeD_00184	GCA_001577565.1	SAMN04432770	PRJNA308326	doi.org/10.1038/nmicrobiol.2016.146
PaGeD_00185	GCA_001577625.1	SAMN04432553	PRJNA308326	doi.org/10.1038/nmicrobiol.2016.146
PaGeD_00186	GCA_001577635.1	SAMN04432558	PRJNA308326	doi.org/10.1038/nmicrobiol.2016.146
PaGeD_00187	GCA_001577655.1	SAMN04432559	PRJNA308326	doi.org/10.1038/nmicrobiol.2016.146
PaGeD_00188	GCA_001634835.1	SAMN04580767	PRJNA305749	doi.org/10.1038/ismej.2015.68
PaGeD_00189	GCA_001635515.1	SAMN04580756	PRJNA305749	doi.org/10.1038/ismej.2015.68
PaGeD_00190	GCA_001635525.1	SAMN04580757	PRJNA305749	doi.org/10.1038/ismej.2015.68
PaGeD_00191	GCA_001723995.1	SAMN05172290	PRJNA308326	doi.org/10.1038/nmicrobiol.2016.146
PaGeD_00192	GCA_001726015.1	SAMN05172267	PRJNA308326	doi.org/10.1038/nmicrobiol.2016.146
PaGeD_00193	GCA_002049785.1	SAMN06236442	PRJNA362212	doi.org/10.1038/s41467-019-09364-x
PaGeD_00194	GCA_002049795.1	SAMN06282502	PRJNA362212	doi.org/10.1038/s41467-019-09364-x
PaGeD_00195	GCA_002049825.1	SAMN06288170	PRJNA362212	doi.org/10.1038/s41467-019-09364-x
PaGeD_00196	GCA_002049835.1	SAMN06288066	PRJNA362212	doi.org/10.1038/s41467-019-09364-x
PaGeD_00197	GCA_002049845.1	SAMN06288092	PRJNA362212	doi.org/10.1038/s41467-019-09364-x
PaGeD_00198	GCA_002049885.1	SAMN06287959	PRJNA362212	doi.org/10.1038/s41467-019-09364-x
PaGeD_00199	GCA_002049895.1	SAMN06288075	PRJNA362212	doi.org/10.1038/s41467-019-09364-x
PaGeD_00200	GCA_002049905.1	SAMN06288222	PRJNA362212	doi.org/10.1038/s41467-019-09364-x
PaGeD_00201	GCA_002049945.1	SAMN06288060	PRJNA362212	doi.org/10.1038/s41467-019-09364-x
PaGeD_00202	GCA_002049955.1	SAMN06288068	PRJNA362212	doi.org/10.1038/s41467-019-09364-x
PaGeD_00203	GCA_002049985.1	SAMN06288098	PRJNA362212	doi.org/10.1038/s41467-019-09364-x
PaGeD_00204	GCA_002050005.1	SAMN06288224	PRJNA362212	doi.org/10.1038/s41467-019-09364-x
PaGeD_00205	GCA_002050025.1	SAMN06288223	PRJNA362212	doi.org/10.1038/s41467-019-09364-x
PaGeD_00206	GCA_002050035.1	SAMN06287783	PRJNA362212	doi.org/10.1038/s41467-019-09364-x
PaGeD_00207	GCA_002059205.1	SAMN06287578	PRJNA362212	doi.org/10.1038/s41467-019-09364-x
PaGeD_00208	GCA_002084345.1	SAMN06628327	PRJNA362212	doi.org/10.1038/s41467-019-09364-x
PaGeD_00209	GCA_002084355.1	SAMN06628309	PRJNA362212	doi.org/10.1038/s41467-019-09364-x
PaGeD_00210	GCA_002084375.1	SAMN06628316	PRJNA362212	doi.org/10.1038/s41467-019-09364-x
PaGeD_00211	GCA_002084385.1	SAMN06628318	PRJNA362212	doi.org/10.1038/s41467-019-09364-x
PaGeD_00212	GCA_002084425.1	SAMN06628311	PRJNA362212	doi.org/10.1038/s41467-019-09364-x
PaGeD_00213	GCA_002084435.1	SAMN06628225	PRJNA362212	doi.org/10.1038/s41467-019-09364-x
PaGeD_00214	GCA_002084445.1	SAMN06628313	PRJNA362212	doi.org/10.1038/s41467-019-09364-x
PaGeD_00215	GCA_002084455.1	SAMN06628312	PRJNA362212	doi.org/10.1038/s41467-019-09364-x
PaGeD_00216	GCA_002084505.1	SAMN06628308	PRJNA362212	doi.org/10.1038/s41467-019-09364-x
PaGeD_00217	GCA_002084525.1	SAMN06628290	PRJNA362212	doi.org/10.1038/s41467-019-09364-x
PaGeD_00218	GCA_002084535.1	SAMN06628291	PRJNA362212	doi.org/10.1038/s41467-019-09364-x
PaGeD_00219	GCA_002084545.1	SAMN06628302	PRJNA362212	doi.org/10.1038/s41467-019-09364-x
PaGeD_00220	GCA_002084585.1	SAMN06628310	PRJNA362212	doi.org/10.1038/s41467-019-09364-x
PaGeD_00221	GCA_002084605.1	SAMN06628326	PRJNA362212	doi.org/10.1038/s41467-019-09364-x
PaGeD_00222	GCA_002084615.1	SAMN06628314	PRJNA362212	doi.org/10.1038/s41467-019-09364-x
PaGeD_00223	GCA_002084625.1	SAMN06628328	PRJNA362212	doi.org/10.1038/s41467-019-09364-x
PaGeD_00224	GCA_002084665.1	SAMN06628330	PRJNA362212	doi.org/10.1038/s41467-019-09364-x
PaGeD_00225	GCA_002084685.1	SAMN06628321	PRJNA362212	doi.org/10.1038/s41467-019-09364-x
PaGeD_00226	GCA_002084705.1	SAMN06628329	PRJNA362212	doi.org/10.1038/s41467-019-09364-x
PaGeD_00227	GCA_002084715.1	SAMN06638369	PRJNA362212	doi.org/10.1038/s41467-019-09364-x
PaGeD_00228	GCA_002084745.1	SAMN06638385	PRJNA362212	doi.org/10.1038/s41467-019-09364-x
PaGeD_00229	GCA_002084765.1	SAMN06638386	PRJNA362212	doi.org/10.1038/s41467-019-09364-x
PaGeD_00230	GCA_002084785.1	SAMN06638389	PRJNA362212	doi.org/10.1038/s41467-019-09364-x
PaGeD_00231	GCA_002084805.1	SAMN06638387	PRJNA362212	doi.org/10.1038/s41467-019-09364-x
PaGeD_00232	GCA_002084825.1	SAMN06638390	PRJNA362212	doi.org/10.1038/s41467-019-09364-x
PaGeD_00233	GCA_002084835.1	SAMN06638388	PRJNA362212	doi.org/10.1038/s41467-019-09364-x
PaGeD_00234	GCA_002084865.1	SAMN06638404	PRJNA362212	doi.org/10.1038/s41467-019-09364-x
PaGeD_00235	GCA_002084875.1	SAMN06638406	PRJNA362212	doi.org/10.1038/s41467-019-09364-x
PaGeD_00236	GCA_002084905.1	SAMN06560459	PRJNA362212	doi.org/10.1038/s41467-019-09364-x
PaGeD_00237	GCA_002084915.1	SAMN06560460	PRJNA362212	doi.org/10.1038/s41467-019-09364-x
PaGeD_00238	GCA_002084945.1	SAMN06638422	PRJNA362212	doi.org/10.1038/s41467-019-09364-x
PaGeD_00239	GCA_002084955.1	SAMN06560473	PRJNA362212	doi.org/10.1038/s41467-019-09364-x
PaGeD_00240	GCA_002084985.1	SAMN06560480	PRJNA362212	doi.org/10.1038/s41467-019-09364-x
PaGeD_00241	GCA_002085025.1	SAMN06560474	PRJNA362212	doi.org/10.1038/s41467-019-09364-x
PaGeD_00242	GCA_002085035.1	SAMN06560478	PRJNA362212	doi.org/10.1038/s41467-019-09364-x
PaGeD_00243	GCA_002085065.1	SAMN06561765	PRJNA362212	doi.org/10.1038/s41467-019-09364-x
PaGeD_00244	GCA_002085085.1	SAMN06560479	PRJNA362212	doi.org/10.1038/s41467-019-09364-x
PaGeD_00245	GCA_002085095.1	SAMN06562070	PRJNA362212	doi.org/10.1038/s41467-019-09364-x
PaGeD_00246	GCA_002085115.1	SAMN06561839	PRJNA362212	doi.org/10.1038/s41467-019-09364-x
PaGeD_00247	GCA_002085145.1	SAMN06624595	PRJNA362212	doi.org/10.1038/s41467-019-09364-x
PaGeD_00248	GCA_002085165.1	SAMN06624596	PRJNA362212	doi.org/10.1038/s41467-019-09364-x
PaGeD_00249	GCA_002085205.1	SAMN06624597	PRJNA362212	doi.org/10.1038/s41467-019-09364-x
PaGeD_00250	GCA_002085215.1	SAMN06624598	PRJNA362212	doi.org/10.1038/s41467-019-09364-x
PaGeD_00251	GCA_002085225.1	SAMN06624599	PRJNA362212	doi.org/10.1038/s41467-019-09364-x
PaGeD_00252	GCA_002085265.1	SAMN06624600	PRJNA362212	doi.org/10.1038/s41467-019-09364-x
PaGeD_00253	GCA_002085285.1	SAMN06624621	PRJNA362212	doi.org/10.1038/s41467-019-09364-x
PaGeD_00254	GCA_002085305.1	SAMN06624620	PRJNA362212	doi.org/10.1038/s41467-019-09364-x
PaGeD_00255	GCA_002085315.1	SAMN06624652	PRJNA362212	doi.org/10.1038/s41467-019-09364-x
PaGeD_00256	GCA_002085345.1	SAMN06624653	PRJNA362212	doi.org/10.1038/s41467-019-09364-x
PaGeD_00257	GCA_002085355.1	SAMN06624654	PRJNA362212	doi.org/10.1038/s41467-019-09364-x
PaGeD_00258	GCA_002085375.1	SAMN06624697	PRJNA362212	doi.org/10.1038/s41467-019-09364-x
PaGeD_00259	GCA_002085385.1	SAMN06624686	PRJNA362212	doi.org/10.1038/s41467-019-09364-x
PaGeD_00260	GCA_002085425.1	SAMN06624699	PRJNA362212	doi.org/10.1038/s41467-019-09364-x
PaGeD_00261	GCA_002085445.1	SAMN06638407	PRJNA362212	doi.org/10.1038/s41467-019-09364-x
PaGeD_00262	GCA_002085455.1	SAMN06638423	PRJNA362212	doi.org/10.1038/s41467-019-09364-x
PaGeD_00263	GCA_002085465.1	SAMN06638424	PRJNA362212	doi.org/10.1038/s41467-019-09364-x
PaGeD_00264	GCA_002101205.1	SAMN04858325	PRJNA318572	doi.org/10.1038/nmicrobiol.2017.93
PaGeD_00265	GCA_002101225.1	SAMN04858326	PRJNA318573	doi.org/10.1038/nmicrobiol.2017.93
PaGeD_00266	GCA_002101235.1	SAMN04858324	PRJNA318571	doi.org/10.1038/nmicrobiol.2017.93
PaGeD_00267	GCA_002162675.1	SAMN05179552	PRJNA320927	doi.org/10.1073/pnas.1703424114
PaGeD_00268	GCA_002162685.1	SAMN05179564	PRJNA320927	doi.org/10.1073/pnas.1703424114
PaGeD_00269	GCA_002162695.1	SAMN05179560	PRJNA320927	doi.org/10.1073/pnas.1703424114
PaGeD_00270	GCA_002162705.1	SAMN05179563	PRJNA320927	doi.org/10.1073/pnas.1703424114
PaGeD_00271	GCA_002162755.1	SAMN05179566	PRJNA320927	doi.org/10.1073/pnas.1703424114
PaGeD_00272	GCA_002162765.1	SAMN05179565	PRJNA320927	doi.org/10.1073/pnas.1703424114
PaGeD_00273	GCA_002162795.1	SAMN05179572	PRJNA320927	doi.org/10.1073/pnas.1703424114
PaGeD_00274	GCA_002162815.1	SAMN05179567	PRJNA320927	doi.org/10.1073/pnas.1703424114
PaGeD_00275	GCA_002162825.1	SAMN05179568	PRJNA320927	doi.org/10.1073/pnas.1703424114
PaGeD_00276	GCA_002162835.1	SAMN05179571	PRJNA320927	doi.org/10.1073/pnas.1703424114
PaGeD_00277	GCA_002162875.1	SAMN05179574	PRJNA320927	doi.org/10.1073/pnas.1703424114
PaGeD_00278	GCA_002162885.1	SAMN05179573	PRJNA320927	doi.org/10.1073/pnas.1703424114
PaGeD_00279	GCA_002162915.1	SAMN05179575	PRJNA320927	doi.org/10.1073/pnas.1703424114
PaGeD_00280	GCA_002162925.1	SAMN05179576	PRJNA320927	doi.org/10.1073/pnas.1703424114
PaGeD_00281	GCA_002162955.1	SAMN05179577	PRJNA320927	doi.org/10.1073/pnas.1703424114
PaGeD_00282	GCA_002162965.1	SAMN05179578	PRJNA320927	doi.org/10.1073/pnas.1703424114
PaGeD_00283	GCA_002162985.1	SAMN05179551	PRJNA320927	doi.org/10.1073/pnas.1703424114
PaGeD_00284	GCA_002163005.1	SAMN05179553	PRJNA320927	doi.org/10.1073/pnas.1703424114
PaGeD_00285	GCA_002163025.1	SAMN05179579	PRJNA320927	doi.org/10.1073/pnas.1703424114
PaGeD_00286	GCA_002163055.1	SAMN05179555	PRJNA320927	doi.org/10.1073/pnas.1703424114
PaGeD_00287	GCA_002163065.1	SAMN05179554	PRJNA320927	doi.org/10.1073/pnas.1703424114
PaGeD_00288	GCA_002163085.1	SAMN05179557	PRJNA320927	doi.org/10.1073/pnas.1703424114
PaGeD_00289	GCA_002163115.1	SAMN05179556	PRJNA320927	doi.org/10.1073/pnas.1703424114
PaGeD_00290	GCA_002163135.1	SAMN05179561	PRJNA320927	doi.org/10.1073/pnas.1703424114
PaGeD_00291	GCA_002163155.1	SAMN05179562	PRJNA320927	doi.org/10.1073/pnas.1703424114
PaGeD_00292	GCA_002163175.1	SAMN05179570	PRJNA320927	doi.org/10.1073/pnas.1703424114
PaGeD_00293	GCA_002163215.1	SAMN05179558	PRJNA320927	doi.org/10.1073/pnas.1703424114
PaGeD_00294	GCA_002163245.1	SAMN05179559	PRJNA320927	doi.org/10.1073/pnas.1703424114
PaGeD_00295	GCA_002215665.1	SAMN06887667	PRJNA249643	doi.org/10.1016/j.margen.2014.06.003
PaGeD_00296	GCA_002245405.1	SAMN06887669	PRJNA249643	doi.org/10.1016/j.margen.2014.06.003
PaGeD_00297	GCA_002245415.1	SAMN06887668	PRJNA249643	doi.org/10.1016/j.margen.2014.06.003
PaGeD_00298	GCA_002254285.1	SAMN06628288	PRJNA362212	doi.org/10.1038/s41467-019-09364-x
PaGeD_00299	GCA_002254295.1	SAMN06638405	PRJNA362212	doi.org/10.1038/s41467-019-09364-x
PaGeD_00300	GCA_002254335.1	SAMN06628289	PRJNA362212	doi.org/10.1038/s41467-019-09364-x
PaGeD_00301	GCA_002256535.1	SAMN07350899	PRJNA362212	doi.org/10.1038/s41467-019-09364-x
PaGeD_00302	GCA_002298825.1	SAMN06453691	PRJNA348753	doi.org/10.1038/s41564-017-0012-7
PaGeD_00303	GCA_002304835.1	SAMN06456898	PRJNA348753	doi.org/10.1038/s41564-017-0012-7
PaGeD_00304	GCA_002304845.1	SAMN06456896	PRJNA348753	doi.org/10.1038/s41564-017-0012-7
PaGeD_00305	GCA_002304855.1	SAMN06456899	PRJNA348753	doi.org/10.1038/s41564-017-0012-7
PaGeD_00306	GCA_002304865.1	SAMN06456897	PRJNA348753	doi.org/10.1038/s41564-017-0012-7
PaGeD_00307	GCA_002304915.1	SAMN06452101	PRJNA348753	doi.org/10.1038/s41564-017-0012-7
PaGeD_00308	GCA_002304925.1	SAMN06451395	PRJNA348753	doi.org/10.1038/s41564-017-0012-7
PaGeD_00309	GCA_002304935.1	SAMN06452089	PRJNA348753	doi.org/10.1038/s41564-017-0012-7
PaGeD_00310	GCA_002304945.1	SAMN06452091	PRJNA348753	doi.org/10.1038/s41564-017-0012-7
PaGeD_00311	GCA_002304995.1	SAMN06452092	PRJNA348753	doi.org/10.1038/s41564-017-0012-7
PaGeD_00312	GCA_002305015.1	SAMN06452093	PRJNA348753	doi.org/10.1038/s41564-017-0012-7
PaGeD_00313	GCA_002305035.1	SAMN06457172	PRJNA348753	doi.org/10.1038/s41564-017-0012-7
PaGeD_00314	GCA_002305045.1	SAMN06450972	PRJNA348753	doi.org/10.1038/s41564-017-0012-7
PaGeD_00315	GCA_002305075.1	SAMN06450959	PRJNA348753	doi.org/10.1038/s41564-017-0012-7
PaGeD_00316	GCA_002305085.1	SAMN06457162	PRJNA348753	doi.org/10.1038/s41564-017-0012-7
PaGeD_00317	GCA_002305115.1	SAMN06457165	PRJNA348753	doi.org/10.1038/s41564-017-0012-7
PaGeD_00318	GCA_002305125.1	SAMN06457164	PRJNA348753	doi.org/10.1038/s41564-017-0012-7
PaGeD_00319	GCA_002305155.1	SAMN06452368	PRJNA348753	doi.org/10.1038/s41564-017-0012-7
PaGeD_00320	GCA_002305165.1	SAMN06452367	PRJNA348753	doi.org/10.1038/s41564-017-0012-7
PaGeD_00321	GCA_002305205.1	SAMN06452364	PRJNA348753	doi.org/10.1038/s41564-017-0012-7
PaGeD_00322	GCA_002305235.1	SAMN06452366	PRJNA348753	doi.org/10.1038/s41564-017-0012-7
PaGeD_00323	GCA_002305255.1	SAMN06452360	PRJNA348753	doi.org/10.1038/s41564-017-0012-7
PaGeD_00324	GCA_002305265.1	SAMN06452362	PRJNA348753	doi.org/10.1038/s41564-017-0012-7
PaGeD_00325	GCA_002305275.1	SAMN06452359	PRJNA348753	doi.org/10.1038/s41564-017-0012-7
PaGeD_00326	GCA_002305315.1	SAMN06452361	PRJNA348753	doi.org/10.1038/s41564-017-0012-7
PaGeD_00327	GCA_002305335.1	SAMN06456176	PRJNA348753	doi.org/10.1038/s41564-017-0012-7
PaGeD_00328	GCA_002305345.1	SAMN06456170	PRJNA348753	doi.org/10.1038/s41564-017-0012-7
PaGeD_00329	GCA_002305355.1	SAMN06456177	PRJNA348753	doi.org/10.1038/s41564-017-0012-7
PaGeD_00330	GCA_002305395.1	SAMN06456169	PRJNA348753	doi.org/10.1038/s41564-017-0012-7
PaGeD_00331	GCA_002305415.1	SAMN06456174	PRJNA348753	doi.org/10.1038/s41564-017-0012-7
PaGeD_00332	GCA_002305435.1	SAMN06456172	PRJNA348753	doi.org/10.1038/s41564-017-0012-7
PaGeD_00333	GCA_002305445.1	SAMN06456173	PRJNA348753	doi.org/10.1038/s41564-017-0012-7
PaGeD_00334	GCA_002305475.1	SAMN06452611	PRJNA348753	doi.org/10.1038/s41564-017-0012-7
PaGeD_00335	GCA_002305495.1	SAMN06452615	PRJNA348753	doi.org/10.1038/s41564-017-0012-7
PaGeD_00336	GCA_002305505.1	SAMN06452610	PRJNA348753	doi.org/10.1038/s41564-017-0012-7
PaGeD_00337	GCA_002305535.1	SAMN06452614	PRJNA348753	doi.org/10.1038/s41564-017-0012-7
PaGeD_00338	GCA_002305545.1	SAMN06452612	PRJNA348753	doi.org/10.1038/s41564-017-0012-7
PaGeD_00339	GCA_002305575.1	SAMN06457066	PRJNA348753	doi.org/10.1038/s41564-017-0012-7
PaGeD_00340	GCA_002305585.1	SAMN06452100	PRJNA348753	doi.org/10.1038/s41564-017-0012-7
PaGeD_00341	GCA_002305615.1	SAMN06457131	PRJNA348753	doi.org/10.1038/s41564-017-0012-7
PaGeD_00342	GCA_002305635.1	SAMN06457781	PRJNA348753	doi.org/10.1038/s41564-017-0012-7
PaGeD_00343	GCA_002305655.1	SAMN06457167	PRJNA348753	doi.org/10.1038/s41564-017-0012-7
PaGeD_00344	GCA_002305675.1	SAMN06457166	PRJNA348753	doi.org/10.1038/s41564-017-0012-7
PaGeD_00345	GCA_002305685.1	SAMN06450960	PRJNA348753	doi.org/10.1038/s41564-017-0012-7
PaGeD_00346	GCA_002305715.1	SAMN06450953	PRJNA348753	doi.org/10.1038/s41564-017-0012-7
PaGeD_00347	GCA_002305725.1	SAMN06452365	PRJNA348753	doi.org/10.1038/s41564-017-0012-7
PaGeD_00348	GCA_002305755.1	SAMN06456168	PRJNA348753	doi.org/10.1038/s41564-017-0012-7
PaGeD_00349	GCA_002305765.1	SAMN06456171	PRJNA348753	doi.org/10.1038/s41564-017-0012-7
PaGeD_00350	GCA_002305795.1	SAMN06452613	PRJNA348753	doi.org/10.1038/s41564-017-0012-7
PaGeD_00351	GCA_002305805.1	SAMN06456175	PRJNA348753	doi.org/10.1038/s41564-017-0012-7
PaGeD_00352	GCA_002305915.1	SAMN06452617	PRJNA348753	doi.org/10.1038/s41564-017-0012-7
PaGeD_00353	GCA_002305925.1	SAMN06456409	PRJNA348753	doi.org/10.1038/s41564-017-0012-7
PaGeD_00354	GCA_002305955.1	SAMN06452619	PRJNA348753	doi.org/10.1038/s41564-017-0012-7
PaGeD_00355	GCA_002305965.1	SAMN06456410	PRJNA348753	doi.org/10.1038/s41564-017-0012-7
PaGeD_00356	GCA_002305995.1	SAMN06456411	PRJNA348753	doi.org/10.1038/s41564-017-0012-7
PaGeD_00357	GCA_002306005.1	SAMN06456412	PRJNA348753	doi.org/10.1038/s41564-017-0012-7
PaGeD_00358	GCA_002306015.1	SAMN06456413	PRJNA348753	doi.org/10.1038/s41564-017-0012-7
PaGeD_00359	GCA_002306055.1	SAMN06456415	PRJNA348753	doi.org/10.1038/s41564-017-0012-7
PaGeD_00360	GCA_002306075.1	SAMN06452917	PRJNA348753	doi.org/10.1038/s41564-017-0012-7
PaGeD_00361	GCA_002306085.1	SAMN06456416	PRJNA348753	doi.org/10.1038/s41564-017-0012-7
PaGeD_00362	GCA_002306095.1	SAMN06452910	PRJNA348753	doi.org/10.1038/s41564-017-0012-7
PaGeD_00363	GCA_002306295.1	SAMN06452618	PRJNA348753	doi.org/10.1038/s41564-017-0012-7
PaGeD_00364	GCA_002306315.1	SAMN06452616	PRJNA348753	doi.org/10.1038/s41564-017-0012-7
PaGeD_00365	GCA_002306335.1	SAMN06456417	PRJNA348753	doi.org/10.1038/s41564-017-0012-7
PaGeD_00366	GCA_002306345.1	SAMN06456414	PRJNA348753	doi.org/10.1038/s41564-017-0012-7
PaGeD_00367	GCA_002306375.1	SAMN06456418	PRJNA348753	doi.org/10.1038/s41564-017-0012-7
PaGeD_00368	GCA_002306385.1	SAMN06452918	PRJNA348753	doi.org/10.1038/s41564-017-0012-7
PaGeD_00369	GCA_002307975.1	SAMN06450811	PRJNA348753	doi.org/10.1038/s41564-017-0012-7
PaGeD_00370	GCA_002320955.1	SAMN06451775	PRJNA348753	doi.org/10.1038/s41564-017-0012-7
PaGeD_00371	GCA_002325085.1	SAMN06456428	PRJNA348753	doi.org/10.1038/s41564-017-0012-7
PaGeD_00372	GCA_002327225.1	SAMN06452193	PRJNA348753	doi.org/10.1038/s41564-017-0012-7
PaGeD_00373	GCA_002327235.1	SAMN06451427	PRJNA348753	doi.org/10.1038/s41564-017-0012-7
PaGeD_00374	GCA_002327245.1	SAMN06453247	PRJNA348753	doi.org/10.1038/s41564-017-0012-7
PaGeD_00375	GCA_002327255.1	SAMN06452215	PRJNA348753	doi.org/10.1038/s41564-017-0012-7
PaGeD_00376	GCA_002327305.1	SAMN06453950	PRJNA348753	doi.org/10.1038/s41564-017-0012-7
PaGeD_00377	GCA_002327315.1	SAMN06456380	PRJNA348753	doi.org/10.1038/s41564-017-0012-7
PaGeD_00378	GCA_002327325.1	SAMN06456383	PRJNA348753	doi.org/10.1038/s41564-017-0012-7
PaGeD_00379	GCA_002327335.1	SAMN06456270	PRJNA348753	doi.org/10.1038/s41564-017-0012-7
PaGeD_00380	GCA_002327385.1	SAMN06452572	PRJNA348753	doi.org/10.1038/s41564-017-0012-7
PaGeD_00381	GCA_002327405.1	SAMN06452568	PRJNA348753	doi.org/10.1038/s41564-017-0012-7
PaGeD_00382	GCA_002327415.1	SAMN06452574	PRJNA348753	doi.org/10.1038/s41564-017-0012-7
PaGeD_00383	GCA_002327445.1	SAMN06455577	PRJNA348753	doi.org/10.1038/s41564-017-0012-7
PaGeD_00384	GCA_002327465.1	SAMN06455570	PRJNA348753	doi.org/10.1038/s41564-017-0012-7
PaGeD_00385	GCA_002327475.1	SAMN06455571	PRJNA348753	doi.org/10.1038/s41564-017-0012-7
PaGeD_00386	GCA_002327745.1	SAMN06452995	PRJNA348753	doi.org/10.1038/s41564-017-0012-7
PaGeD_00387	GCA_002327765.1	SAMN06454047	PRJNA348753	doi.org/10.1038/s41564-017-0012-7
PaGeD_00388	GCA_002327785.1	SAMN06454046	PRJNA348753	doi.org/10.1038/s41564-017-0012-7
PaGeD_00389	GCA_002327805.1	SAMN06453147	PRJNA348753	doi.org/10.1038/s41564-017-0012-7
PaGeD_00390	GCA_002327825.1	SAMN06453170	PRJNA348753	doi.org/10.1038/s41564-017-0012-7
PaGeD_00391	GCA_002327845.1	SAMN06454041	PRJNA348753	doi.org/10.1038/s41564-017-0012-7
PaGeD_00392	GCA_002327865.1	SAMN06454040	PRJNA348753	doi.org/10.1038/s41564-017-0012-7
PaGeD_00393	GCA_002327885.1	SAMN06453248	PRJNA348753	doi.org/10.1038/s41564-017-0012-7
PaGeD_00394	GCA_002327905.1	SAMN06451428	PRJNA348753	doi.org/10.1038/s41564-017-0012-7
PaGeD_00395	GCA_002327925.1	SAMN06453951	PRJNA348753	doi.org/10.1038/s41564-017-0012-7
PaGeD_00396	GCA_002327945.1	SAMN06455575	PRJNA348753	doi.org/10.1038/s41564-017-0012-7
PaGeD_00397	GCA_002327965.1	SAMN06456373	PRJNA348753	doi.org/10.1038/s41564-017-0012-7
PaGeD_00398	GCA_002327985.1	SAMN06452576	PRJNA348753	doi.org/10.1038/s41564-017-0012-7
PaGeD_00399	GCA_002328025.1	SAMN06456285	PRJNA348753	doi.org/10.1038/s41564-017-0012-7
PaGeD_00400	GCA_002328035.1	SAMN06452577	PRJNA348753	doi.org/10.1038/s41564-017-0012-7
PaGeD_00401	GCA_002328065.1	SAMN06452573	PRJNA348753	doi.org/10.1038/s41564-017-0012-7
PaGeD_00402	GCA_002328075.1	SAMN06452575	PRJNA348753	doi.org/10.1038/s41564-017-0012-7
PaGeD_00403	GCA_002328085.1	SAMN06455572	PRJNA348753	doi.org/10.1038/s41564-017-0012-7
PaGeD_00404	GCA_002328145.1	SAMN06455576	PRJNA348753	doi.org/10.1038/s41564-017-0012-7
PaGeD_00405	GCA_002328435.1	SAMN06452992	PRJNA348753	doi.org/10.1038/s41564-017-0012-7
PaGeD_00406	GCA_002328465.1	SAMN06452993	PRJNA348753	doi.org/10.1038/s41564-017-0012-7
PaGeD_00407	GCA_002328485.1	SAMN06452994	PRJNA348753	doi.org/10.1038/s41564-017-0012-7
PaGeD_00408	GCA_002328495.1	SAMN06453159	PRJNA348753	doi.org/10.1038/s41564-017-0012-7
PaGeD_00409	GCA_002328515.1	SAMN06454038	PRJNA348753	doi.org/10.1038/s41564-017-0012-7
PaGeD_00410	GCA_002328545.1	SAMN06453240	PRJNA348753	doi.org/10.1038/s41564-017-0012-7
PaGeD_00411	GCA_002328585.1	SAMN06451412	PRJNA348753	doi.org/10.1038/s41564-017-0012-7
PaGeD_00412	GCA_002328605.1	SAMN06451413	PRJNA348753	doi.org/10.1038/s41564-017-0012-7
PaGeD_00413	GCA_002328625.1	SAMN06456374	PRJNA348753	doi.org/10.1038/s41564-017-0012-7
PaGeD_00414	GCA_002328635.1	SAMN06456381	PRJNA348753	doi.org/10.1038/s41564-017-0012-7
PaGeD_00415	GCA_002328665.1	SAMN06456382	PRJNA348753	doi.org/10.1038/s41564-017-0012-7
PaGeD_00416	GCA_002328685.1	SAMN06456266	PRJNA348753	doi.org/10.1038/s41564-017-0012-7
PaGeD_00417	GCA_002328705.1	SAMN06452569	PRJNA348753	doi.org/10.1038/s41564-017-0012-7
PaGeD_00418	GCA_002328725.1	SAMN06452571	PRJNA348753	doi.org/10.1038/s41564-017-0012-7
PaGeD_00419	GCA_002328745.1	SAMN06452570	PRJNA348753	doi.org/10.1038/s41564-017-0012-7
PaGeD_00420	GCA_002328755.1	SAMN06455568	PRJNA348753	doi.org/10.1038/s41564-017-0012-7
PaGeD_00421	GCA_002328785.1	SAMN06455569	PRJNA348753	doi.org/10.1038/s41564-017-0012-7
PaGeD_00422	GCA_002329165.1	SAMN06451557	PRJNA348753	doi.org/10.1038/s41564-017-0012-7
PaGeD_00423	GCA_002329205.1	SAMN06451558	PRJNA348753	doi.org/10.1038/s41564-017-0012-7
PaGeD_00424	GCA_002329225.1	SAMN06451865	PRJNA348753	doi.org/10.1038/s41564-017-0012-7
PaGeD_00425	GCA_002329245.1	SAMN06451864	PRJNA348753	doi.org/10.1038/s41564-017-0012-7
PaGeD_00426	GCA_002329255.1	SAMN06454368	PRJNA348753	doi.org/10.1038/s41564-017-0012-7
PaGeD_00427	GCA_002329285.1	SAMN06451855	PRJNA348753	doi.org/10.1038/s41564-017-0012-7
PaGeD_00428	GCA_002329295.1	SAMN06451856	PRJNA348753	doi.org/10.1038/s41564-017-0012-7
PaGeD_00429	GCA_002329325.1	SAMN06456895	PRJNA348753	doi.org/10.1038/s41564-017-0012-7
PaGeD_00430	GCA_002329335.1	SAMN06456894	PRJNA348753	doi.org/10.1038/s41564-017-0012-7
PaGeD_00431	GCA_002329365.1	SAMN06456901	PRJNA348753	doi.org/10.1038/s41564-017-0012-7
PaGeD_00432	GCA_002329385.1	SAMN06453856	PRJNA348753	doi.org/10.1038/s41564-017-0012-7
PaGeD_00433	GCA_002329395.1	SAMN06451861	PRJNA348753	doi.org/10.1038/s41564-017-0012-7
PaGeD_00434	GCA_002329405.1	SAMN06454359	PRJNA348753	doi.org/10.1038/s41564-017-0012-7
PaGeD_00435	GCA_002329445.1	SAMN06453843	PRJNA348753	doi.org/10.1038/s41564-017-0012-7
PaGeD_00436	GCA_002329465.1	SAMN06453848	PRJNA348753	doi.org/10.1038/s41564-017-0012-7
PaGeD_00437	GCA_002329485.1	SAMN06456903	PRJNA348753	doi.org/10.1038/s41564-017-0012-7
PaGeD_00438	GCA_002329495.1	SAMN06451867	PRJNA348753	doi.org/10.1038/s41564-017-0012-7
PaGeD_00439	GCA_002329525.1	SAMN06456298	PRJNA348753	doi.org/10.1038/s41564-017-0012-7
PaGeD_00440	GCA_002329545.1	SAMN06454366	PRJNA348753	doi.org/10.1038/s41564-017-0012-7
PaGeD_00441	GCA_002329565.1	SAMN06451896	PRJNA348753	doi.org/10.1038/s41564-017-0012-7
PaGeD_00442	GCA_002329575.1	SAMN06451879	PRJNA348753	doi.org/10.1038/s41564-017-0012-7
PaGeD_00443	GCA_002329605.1	SAMN06451854	PRJNA348753	doi.org/10.1038/s41564-017-0012-7
PaGeD_00444	GCA_002329625.1	SAMN06451860	PRJNA348753	doi.org/10.1038/s41564-017-0012-7
PaGeD_00445	GCA_002329645.1	SAMN06453857	PRJNA348753	doi.org/10.1038/s41564-017-0012-7
PaGeD_00446	GCA_002329665.1	SAMN06453844	PRJNA348753	doi.org/10.1038/s41564-017-0012-7
PaGeD_00447	GCA_002329675.1	SAMN06456902	PRJNA348753	doi.org/10.1038/s41564-017-0012-7
PaGeD_00448	GCA_002329705.1	SAMN06456900	PRJNA348753	doi.org/10.1038/s41564-017-0012-7
PaGeD_00449	GCA_002331905.1	SAMN06454689	PRJNA348753	doi.org/10.1038/s41564-017-0012-7
PaGeD_00450	GCA_002335355.1	SAMN06454360	PRJNA348753	doi.org/10.1038/s41564-017-0012-7
PaGeD_00451	GCA_002335385.1	SAMN06456378	PRJNA348753	doi.org/10.1038/s41564-017-0012-7
PaGeD_00452	GCA_002338095.1	SAMN06453178	PRJNA348753	doi.org/10.1038/s41564-017-0012-7
PaGeD_00453	GCA_002338125.1	SAMN06453996	PRJNA348753	doi.org/10.1038/s41564-017-0012-7
PaGeD_00454	GCA_002338145.1	SAMN06453990	PRJNA348753	doi.org/10.1038/s41564-017-0012-7
PaGeD_00455	GCA_002343685.1	SAMN06453076	PRJNA348753	doi.org/10.1038/s41564-017-0012-7
PaGeD_00456	GCA_002347965.1	SAMN06453794	PRJNA348753	doi.org/10.1038/s41564-017-0012-7
PaGeD_00457	GCA_002348005.1	SAMN06453791	PRJNA348753	doi.org/10.1038/s41564-017-0012-7
PaGeD_00458	GCA_002348025.1	SAMN06452990	PRJNA348753	doi.org/10.1038/s41564-017-0012-7
PaGeD_00459	GCA_002348045.1	SAMN06453793	PRJNA348753	doi.org/10.1038/s41564-017-0012-7
PaGeD_00460	GCA_002348085.1	SAMN06453792	PRJNA348753	doi.org/10.1038/s41564-017-0012-7
PaGeD_00461	GCA_002348095.1	SAMN06452996	PRJNA348753	doi.org/10.1038/s41564-017-0012-7
PaGeD_00462	GCA_002348105.1	SAMN06452991	PRJNA348753	doi.org/10.1038/s41564-017-0012-7
PaGeD_00463	GCA_002348145.1	SAMN06452997	PRJNA348753	doi.org/10.1038/s41564-017-0012-7
PaGeD_00464	GCA_002348185.1	SAMN06452999	PRJNA348753	doi.org/10.1038/s41564-017-0012-7
PaGeD_00465	GCA_002348205.1	SAMN06452998	PRJNA348753	doi.org/10.1038/s41564-017-0012-7
PaGeD_00466	GCA_002352345.1	SAMN06457873	PRJNA348753	doi.org/10.1016/j.margen.2014.06.003
PaGeD_00467	GCA_002352365.1	SAMN06451507	PRJNA348753	doi.org/10.1016/j.margen.2014.06.003
PaGeD_00468	GCA_002352375.1	SAMN06451509	PRJNA348753	doi.org/10.1016/j.margen.2014.06.003
PaGeD_00469	GCA_002352385.1	SAMN06451510	PRJNA348753	doi.org/10.1016/j.margen.2014.06.003
PaGeD_00470	GCA_002352425.1	SAMN06451508	PRJNA348753	doi.org/10.1016/j.margen.2014.06.003
PaGeD_00471	GCA_002352445.1	SAMN06451505	PRJNA348753	doi.org/10.1016/j.margen.2014.06.003
PaGeD_00472	GCA_002352465.1	SAMN06451503	PRJNA348753	doi.org/10.1016/j.margen.2014.06.003
PaGeD_00473	GCA_002352485.1	SAMN06451506	PRJNA348753	doi.org/10.1016/j.margen.2014.06.003
PaGeD_00474	GCA_002352545.1	SAMN06451504	PRJNA348753	doi.org/10.1016/j.margen.2014.06.003
PaGeD_00475	GCA_002352555.1	SAMN06454302	PRJNA348753	doi.org/10.1016/j.margen.2014.06.003
PaGeD_00476	GCA_002352565.1	SAMN06451502	PRJNA348753	doi.org/10.1016/j.margen.2014.06.003
PaGeD_00477	GCA_002352605.1	SAMN06451501	PRJNA348753	doi.org/10.1016/j.margen.2014.06.003
PaGeD_00478	GCA_002352625.1	SAMN06454301	PRJNA348753	doi.org/10.1016/j.margen.2014.06.003
PaGeD_00479	GCA_002352635.1	SAMN06454304	PRJNA348753	doi.org/10.1016/j.margen.2014.06.003
PaGeD_00480	GCA_002352645.1	SAMN06454303	PRJNA348753	doi.org/10.1016/j.margen.2014.06.003
PaGeD_00481	GCA_002352665.1	SAMN06454306	PRJNA348753	doi.org/10.1016/j.margen.2014.06.003
PaGeD_00482	GCA_002352935.1	SAMN06453997	PRJNA348753	doi.org/10.1038/s41564-017-0012-7
PaGeD_00483	GCA_002352945.1	SAMN06453994	PRJNA348753	doi.org/10.1038/s41564-017-0012-7
PaGeD_00484	GCA_002353005.1	SAMN06453991	PRJNA348753	doi.org/10.1038/s41564-017-0012-7
PaGeD_00485	GCA_002367075.1	SAMN06457699	PRJNA348753	doi.org/10.1038/s41564-017-0012-7
PaGeD_00486	GCA_002376585.1	SAMN06456096	PRJNA348753	doi.org/10.1038/s41564-017-0012-7
PaGeD_00487	GCA_002377855.1	SAMN06452294	PRJNA348753	doi.org/10.1038/s41564-017-0012-7
PaGeD_00488	GCA_002381745.1	SAMN06452945	PRJNA348753	doi.org/10.1038/s41564-017-0012-7
PaGeD_00489	GCA_002381765.1	SAMN06456329	PRJNA348753	doi.org/10.1038/s41564-017-0012-7
PaGeD_00490	GCA_002381805.1	SAMN06456331	PRJNA348753	doi.org/10.1038/s41564-017-0012-7
PaGeD_00491	GCA_002381825.1	SAMN06451307	PRJNA348753	doi.org/10.1038/s41564-017-0012-7
PaGeD_00492	GCA_002381865.1	SAMN06451306	PRJNA348753	doi.org/10.1038/s41564-017-0012-7
PaGeD_00493	GCA_002381885.1	SAMN06456323	PRJNA348753	doi.org/10.1038/s41564-017-0012-7
PaGeD_00494	GCA_002381895.1	SAMN06452287	PRJNA348753	doi.org/10.1038/s41564-017-0012-7
PaGeD_00495	GCA_002381925.1	SAMN06457106	PRJNA348753	doi.org/10.1038/s41564-017-0012-7
PaGeD_00496	GCA_002381945.1	SAMN06456328	PRJNA348753	doi.org/10.1038/s41564-017-0012-7
PaGeD_00497	GCA_002381965.1	SAMN06457098	PRJNA348753	doi.org/10.1038/s41564-017-0012-7
PaGeD_00498	GCA_002381985.1	SAMN06457100	PRJNA348753	doi.org/10.1038/s41564-017-0012-7
PaGeD_00499	GCA_002382005.1	SAMN06452285	PRJNA348753	doi.org/10.1038/s41564-017-0012-7
PaGeD_00500	GCA_002382025.1	SAMN06457096	PRJNA348753	doi.org/10.1038/s41564-017-0012-7
PaGeD_00501	GCA_002382045.1	SAMN06454798	PRJNA348753	doi.org/10.1038/s41564-017-0012-7
PaGeD_00502	GCA_002382065.1	SAMN06457099	PRJNA348753	doi.org/10.1038/s41564-017-0012-7
PaGeD_00503	GCA_002382075.1	SAMN06457101	PRJNA348753	doi.org/10.1038/s41564-017-0012-7
PaGeD_00504	GCA_002382085.1	SAMN06454797	PRJNA348753	doi.org/10.1038/s41564-017-0012-7
PaGeD_00505	GCA_002382125.1	SAMN06454804	PRJNA348753	doi.org/10.1038/s41564-017-0012-7
PaGeD_00506	GCA_002382135.1	SAMN06457342	PRJNA348753	doi.org/10.1038/s41564-017-0012-7
PaGeD_00507	GCA_002382165.1	SAMN06457338	PRJNA348753	doi.org/10.1038/s41564-017-0012-7
PaGeD_00508	GCA_002382185.1	SAMN06454805	PRJNA348753	doi.org/10.1038/s41564-017-0012-7
PaGeD_00509	GCA_002382205.1	SAMN06454803	PRJNA348753	doi.org/10.1038/s41564-017-0012-7
PaGeD_00510	GCA_002382245.1	SAMN06457336	PRJNA348753	doi.org/10.1038/s41564-017-0012-7
PaGeD_00511	GCA_002382285.1	SAMN06457341	PRJNA348753	doi.org/10.1038/s41564-017-0012-7
PaGeD_00512	GCA_002382495.1	SAMN06456322	PRJNA348753	doi.org/10.1038/s41564-017-0012-7
PaGeD_00513	GCA_002382525.1	SAMN06456330	PRJNA348753	doi.org/10.1038/s41564-017-0012-7
PaGeD_00514	GCA_002382535.1	SAMN06456325	PRJNA348753	doi.org/10.1038/s41564-017-0012-7
PaGeD_00515	GCA_002382565.1	SAMN06456326	PRJNA348753	doi.org/10.1038/s41564-017-0012-7
PaGeD_00516	GCA_002382585.1	SAMN06456324	PRJNA348753	doi.org/10.1038/s41564-017-0012-7
PaGeD_00517	GCA_002382605.1	SAMN06451300	PRJNA348753	doi.org/10.1038/s41564-017-0012-7
PaGeD_00518	GCA_002382615.1	SAMN06451303	PRJNA348753	doi.org/10.1038/s41564-017-0012-7
PaGeD_00519	GCA_002382645.1	SAMN06452288	PRJNA348753	doi.org/10.1038/s41564-017-0012-7
PaGeD_00520	GCA_002382665.1	SAMN06457107	PRJNA348753	doi.org/10.1038/s41564-017-0012-7
PaGeD_00521	GCA_002382685.1	SAMN06457102	PRJNA348753	doi.org/10.1038/s41564-017-0012-7
PaGeD_00522	GCA_002382705.1	SAMN06454800	PRJNA348753	doi.org/10.1038/s41564-017-0012-7
PaGeD_00523	GCA_002382725.1	SAMN06454799	PRJNA348753	doi.org/10.1038/s41564-017-0012-7
PaGeD_00524	GCA_002382735.1	SAMN06454802	PRJNA348753	doi.org/10.1038/s41564-017-0012-7
PaGeD_00525	GCA_002382755.1	SAMN06457344	PRJNA348753	doi.org/10.1038/s41564-017-0012-7
PaGeD_00526	GCA_002382785.1	SAMN06457345	PRJNA348753	doi.org/10.1038/s41564-017-0012-7
PaGeD_00527	GCA_002383285.1	SAMN06452942	PRJNA348753	doi.org/10.1038/s41564-017-0012-7
PaGeD_00528	GCA_002383305.1	SAMN06451299	PRJNA348753	doi.org/10.1038/s41564-017-0012-7
PaGeD_00529	GCA_002383325.1	SAMN06451301	PRJNA348753	doi.org/10.1038/s41564-017-0012-7
PaGeD_00530	GCA_002383345.1	SAMN06451304	PRJNA348753	doi.org/10.1038/s41564-017-0012-7
PaGeD_00531	GCA_002383355.1	SAMN06451308	PRJNA348753	doi.org/10.1038/s41564-017-0012-7
PaGeD_00532	GCA_002383375.1	SAMN06452282	PRJNA348753	doi.org/10.1038/s41564-017-0012-7
PaGeD_00533	GCA_002383405.1	SAMN06452281	PRJNA348753	doi.org/10.1038/s41564-017-0012-7
PaGeD_00534	GCA_002383415.1	SAMN06452279	PRJNA348753	doi.org/10.1038/s41564-017-0012-7
PaGeD_00535	GCA_002383425.1	SAMN06452286	PRJNA348753	doi.org/10.1038/s41564-017-0012-7
PaGeD_00536	GCA_002383435.1	SAMN06452284	PRJNA348753	doi.org/10.1038/s41564-017-0012-7
PaGeD_00537	GCA_002383485.1	SAMN06452283	PRJNA348753	doi.org/10.1038/s41564-017-0012-7
PaGeD_00538	GCA_002383495.1	SAMN06454801	PRJNA348753	doi.org/10.1038/s41564-017-0012-7
PaGeD_00539	GCA_002383505.1	SAMN06454806	PRJNA348753	doi.org/10.1038/s41564-017-0012-7
PaGeD_00540	GCA_002383565.1	SAMN06456327	PRJNA348753	doi.org/10.1038/s41564-017-0012-7
PaGeD_00541	GCA_002383605.1	SAMN06451302	PRJNA348753	doi.org/10.1038/s41564-017-0012-7
PaGeD_00542	GCA_002383615.1	SAMN06451305	PRJNA348753	doi.org/10.1038/s41564-017-0012-7
PaGeD_00543	GCA_002383625.1	SAMN06452280	PRJNA348753	doi.org/10.1038/s41564-017-0012-7
PaGeD_00544	GCA_002383665.1	SAMN06450449	PRJNA348753	doi.org/10.1038/s41564-017-0012-7
PaGeD_00545	GCA_002383685.1	SAMN06450440	PRJNA348753	doi.org/10.1038/s41564-017-0012-7
PaGeD_00546	GCA_002383695.1	SAMN06457340	PRJNA348753	doi.org/10.1038/s41564-017-0012-7
PaGeD_00547	GCA_002383805.1	SAMN06457343	PRJNA348753	doi.org/10.1038/s41564-017-0012-7
PaGeD_00548	GCA_002386545.1	SAMN06457685	PRJNA348753	doi.org/10.1038/s41564-017-0012-7
PaGeD_00549	GCA_002387345.1	SAMN06455123	PRJNA348753	doi.org/10.1038/s41564-017-0012-7
PaGeD_00550	GCA_002400405.1	SAMN06453060	PRJNA348753	doi.org/10.1038/s41564-017-0012-7
PaGeD_00551	GCA_002402275.1	SAMN06453053	PRJNA348753	doi.org/10.1038/s41564-017-0012-7
PaGeD_00552	GCA_002402295.1	SAMN06453054	PRJNA348753	doi.org/10.1038/s41564-017-0012-7
PaGeD_00553	GCA_002402305.1	SAMN06454089	PRJNA348753	doi.org/10.1038/s41564-017-0012-7
PaGeD_00554	GCA_002402315.1	SAMN06453055	PRJNA348753	doi.org/10.1038/s41564-017-0012-7
PaGeD_00555	GCA_002402325.1	SAMN06453056	PRJNA348753	doi.org/10.1038/s41564-017-0012-7
PaGeD_00556	GCA_002402375.1	SAMN06454096	PRJNA348753	doi.org/10.1038/s41564-017-0012-7
PaGeD_00557	GCA_002402385.1	SAMN06454095	PRJNA348753	doi.org/10.1038/s41564-017-0012-7
PaGeD_00558	GCA_002402395.1	SAMN06454088	PRJNA348753	doi.org/10.1038/s41564-017-0012-7
PaGeD_00559	GCA_002402405.1	SAMN06454098	PRJNA348753	doi.org/10.1038/s41564-017-0012-7
PaGeD_00560	GCA_002402455.1	SAMN06454092	PRJNA348753	doi.org/10.1038/s41564-017-0012-7
PaGeD_00561	GCA_002402465.1	SAMN06454097	PRJNA348753	doi.org/10.1038/s41564-017-0012-7
PaGeD_00562	GCA_002402475.1	SAMN06454094	PRJNA348753	doi.org/10.1038/s41564-017-0012-7
PaGeD_00563	GCA_002402485.1	SAMN06454091	PRJNA348753	doi.org/10.1038/s41564-017-0012-7
PaGeD_00564	GCA_002402535.1	SAMN06453303	PRJNA348753	doi.org/10.1038/s41564-017-0012-7
PaGeD_00565	GCA_002402545.1	SAMN06454093	PRJNA348753	doi.org/10.1038/s41564-017-0012-7
PaGeD_00566	GCA_002402575.1	SAMN06453307	PRJNA348753	doi.org/10.1038/s41564-017-0012-7
PaGeD_00567	GCA_002402585.1	SAMN06453304	PRJNA348753	doi.org/10.1038/s41564-017-0012-7
PaGeD_00568	GCA_002402615.1	SAMN06453306	PRJNA348753	doi.org/10.1038/s41564-017-0012-7
PaGeD_00569	GCA_002402635.1	SAMN06451831	PRJNA348753	doi.org/10.1038/s41564-017-0012-7
PaGeD_00570	GCA_002402645.1	SAMN06453305	PRJNA348753	doi.org/10.1038/s41564-017-0012-7
PaGeD_00571	GCA_002402655.1	SAMN06453311	PRJNA348753	doi.org/10.1038/s41564-017-0012-7
PaGeD_00572	GCA_002402695.1	SAMN06453312	PRJNA348753	doi.org/10.1038/s41564-017-0012-7
PaGeD_00573	GCA_002402715.1	SAMN06453309	PRJNA348753	doi.org/10.1038/s41564-017-0012-7
PaGeD_00574	GCA_002402725.1	SAMN06450502	PRJNA348753	doi.org/10.1038/s41564-017-0012-7
PaGeD_00575	GCA_002402755.1	SAMN06453310	PRJNA348753	doi.org/10.1038/s41564-017-0012-7
PaGeD_00576	GCA_002402775.1	SAMN06450503	PRJNA348753	doi.org/10.1038/s41564-017-0012-7
PaGeD_00577	GCA_002402795.1	SAMN06450497	PRJNA348753	doi.org/10.1038/s41564-017-0012-7
PaGeD_00578	GCA_002402815.1	SAMN06450496	PRJNA348753	doi.org/10.1038/s41564-017-0012-7
PaGeD_00579	GCA_002402825.1	SAMN06450494	PRJNA348753	doi.org/10.1038/s41564-017-0012-7
PaGeD_00580	GCA_002402855.1	SAMN06450495	PRJNA348753	doi.org/10.1038/s41564-017-0012-7
PaGeD_00581	GCA_002402875.1	SAMN06450500	PRJNA348753	doi.org/10.1038/s41564-017-0012-7
PaGeD_00582	GCA_002402885.1	SAMN06450501	PRJNA348753	doi.org/10.1038/s41564-017-0012-7
PaGeD_00583	GCA_002402905.1	SAMN06450498	PRJNA348753	doi.org/10.1038/s41564-017-0012-7
PaGeD_00584	GCA_002402935.1	SAMN06450499	PRJNA348753	doi.org/10.1038/s41564-017-0012-7
PaGeD_00585	GCA_002402945.1	SAMN06455484	PRJNA348753	doi.org/10.1038/s41564-017-0012-7
PaGeD_00586	GCA_002402965.1	SAMN06455483	PRJNA348753	doi.org/10.1038/s41564-017-0012-7
PaGeD_00587	GCA_002402995.1	SAMN06455480	PRJNA348753	doi.org/10.1038/s41564-017-0012-7
PaGeD_00588	GCA_002403015.1	SAMN06455479	PRJNA348753	doi.org/10.1038/s41564-017-0012-7
PaGeD_00589	GCA_002403025.1	SAMN06455482	PRJNA348753	doi.org/10.1038/s41564-017-0012-7
PaGeD_00590	GCA_002403055.1	SAMN06455481	PRJNA348753	doi.org/10.1038/s41564-017-0012-7
PaGeD_00591	GCA_002403075.1	SAMN06455476	PRJNA348753	doi.org/10.1038/s41564-017-0012-7
PaGeD_00592	GCA_002403095.1	SAMN06455475	PRJNA348753	doi.org/10.1038/s41564-017-0012-7
PaGeD_00593	GCA_002403105.1	SAMN06455478	PRJNA348753	doi.org/10.1038/s41564-017-0012-7
PaGeD_00594	GCA_002403115.1	SAMN06455477	PRJNA348753	doi.org/10.1038/s41564-017-0012-7
PaGeD_00595	GCA_002403155.1	SAMN06450731	PRJNA348753	doi.org/10.1038/s41564-017-0012-7
PaGeD_00596	GCA_002403175.1	SAMN06450732	PRJNA348753	doi.org/10.1038/s41564-017-0012-7
PaGeD_00597	GCA_002403185.1	SAMN06450733	PRJNA348753	doi.org/10.1038/s41564-017-0012-7
PaGeD_00598	GCA_002403205.1	SAMN06450735	PRJNA348753	doi.org/10.1038/s41564-017-0012-7
PaGeD_00599	GCA_002403255.1	SAMN06450737	PRJNA348753	doi.org/10.1038/s41564-017-0012-7
PaGeD_00600	GCA_002403265.1	SAMN06450736	PRJNA348753	doi.org/10.1038/s41564-017-0012-7
PaGeD_00601	GCA_002403295.1	SAMN06450739	PRJNA348753	doi.org/10.1038/s41564-017-0012-7
PaGeD_00602	GCA_002403305.1	SAMN06450738	PRJNA348753	doi.org/10.1038/s41564-017-0012-7
PaGeD_00603	GCA_002403335.1	SAMN06450740	PRJNA348753	doi.org/10.1038/s41564-017-0012-7
PaGeD_00604	GCA_002403345.1	SAMN06455744	PRJNA348753	doi.org/10.1038/s41564-017-0012-7
PaGeD_00605	GCA_002403375.1	SAMN06455743	PRJNA348753	doi.org/10.1038/s41564-017-0012-7
PaGeD_00606	GCA_002403385.1	SAMN06455748	PRJNA348753	doi.org/10.1038/s41564-017-0012-7
PaGeD_00607	GCA_002412205.1	SAMN06647983	PRJNA362212	doi.org/10.1186/s40168-017-0322-2
PaGeD_00608	GCA_002416185.1	SAMN06455462	PRJNA348753	doi.org/10.1038/s41564-017-0012-7
PaGeD_00609	GCA_002418585.1	SAMN06455691	PRJNA348753	doi.org/10.1038/s41564-017-0012-7
PaGeD_00610	GCA_002418595.1	SAMN06454245	PRJNA348753	doi.org/10.1038/s41564-017-0012-7
PaGeD_00611	GCA_002418625.1	SAMN06454243	PRJNA348753	doi.org/10.1038/s41564-017-0012-7
PaGeD_00612	GCA_002418645.1	SAMN06455697	PRJNA348753	doi.org/10.1038/s41564-017-0012-7
PaGeD_00613	GCA_002418655.1	SAMN06454249	PRJNA348753	doi.org/10.1038/s41564-017-0012-7
PaGeD_00614	GCA_002418685.1	SAMN06455695	PRJNA348753	doi.org/10.1038/s41564-017-0012-7
PaGeD_00615	GCA_002418705.1	SAMN06454247	PRJNA348753	doi.org/10.1038/s41564-017-0012-7
PaGeD_00616	GCA_002418725.1	SAMN06451457	PRJNA348753	doi.org/10.1038/s41564-017-0012-7
PaGeD_00617	GCA_002418745.1	SAMN06451458	PRJNA348753	doi.org/10.1038/s41564-017-0012-7
PaGeD_00618	GCA_002418765.1	SAMN06451449	PRJNA348753	doi.org/10.1038/s41564-017-0012-7
PaGeD_00619	GCA_002418775.1	SAMN06451450	PRJNA348753	doi.org/10.1038/s41564-017-0012-7
PaGeD_00620	GCA_002418805.1	SAMN06451451	PRJNA348753	doi.org/10.1038/s41564-017-0012-7
PaGeD_00621	GCA_002418825.1	SAMN06451452	PRJNA348753	doi.org/10.1038/s41564-017-0012-7
PaGeD_00622	GCA_002418835.1	SAMN06451453	PRJNA348753	doi.org/10.1038/s41564-017-0012-7
PaGeD_00623	GCA_002418865.1	SAMN06451454	PRJNA348753	doi.org/10.1038/s41564-017-0012-7
PaGeD_00624	GCA_002418885.1	SAMN06451455	PRJNA348753	doi.org/10.1038/s41564-017-0012-7
PaGeD_00625	GCA_002418895.1	SAMN06451456	PRJNA348753	doi.org/10.1038/s41564-017-0012-7
PaGeD_00626	GCA_002418925.1	SAMN06454535	PRJNA348753	doi.org/10.1038/s41564-017-0012-7
PaGeD_00627	GCA_002418945.1	SAMN06454534	PRJNA348753	doi.org/10.1038/s41564-017-0012-7
PaGeD_00628	GCA_002418965.1	SAMN06454537	PRJNA348753	doi.org/10.1038/s41564-017-0012-7
PaGeD_00629	GCA_002418985.1	SAMN06454536	PRJNA348753	doi.org/10.1038/s41564-017-0012-7
PaGeD_00630	GCA_002419005.1	SAMN06454539	PRJNA348753	doi.org/10.1038/s41564-017-0012-7
PaGeD_00631	GCA_002419025.1	SAMN06454538	PRJNA348753	doi.org/10.1038/s41564-017-0012-7
PaGeD_00632	GCA_002419045.1	SAMN06454543	PRJNA348753	doi.org/10.1038/s41564-017-0012-7
PaGeD_00633	GCA_002419055.1	SAMN06454540	PRJNA348753	doi.org/10.1038/s41564-017-0012-7
PaGeD_00634	GCA_002419085.1	SAMN06454542	PRJNA348753	doi.org/10.1038/s41564-017-0012-7
PaGeD_00635	GCA_002419125.1	SAMN06451747	PRJNA348753	doi.org/10.1038/s41564-017-0012-7
PaGeD_00636	GCA_002419135.1	SAMN06451748	PRJNA348753	doi.org/10.1038/s41564-017-0012-7
PaGeD_00637	GCA_002419145.1	SAMN06451745	PRJNA348753	doi.org/10.1038/s41564-017-0012-7
PaGeD_00638	GCA_002419185.1	SAMN06451741	PRJNA348753	doi.org/10.1038/s41564-017-0012-7
PaGeD_00639	GCA_002419195.1	SAMN06451743	PRJNA348753	doi.org/10.1038/s41564-017-0012-7
PaGeD_00640	GCA_002419205.1	SAMN06456505	PRJNA348753	doi.org/10.1038/s41564-017-0012-7
PaGeD_00641	GCA_002419215.1	SAMN06451744	PRJNA348753	doi.org/10.1038/s41564-017-0012-7
PaGeD_00642	GCA_002419265.1	SAMN06451739	PRJNA348753	doi.org/10.1038/s41564-017-0012-7
PaGeD_00643	GCA_002419285.1	SAMN06456503	PRJNA348753	doi.org/10.1038/s41564-017-0012-7
PaGeD_00644	GCA_002419295.1	SAMN06457054	PRJNA348753	doi.org/10.1038/s41564-017-0012-7
PaGeD_00645	GCA_002419305.1	SAMN06457839	PRJNA348753	doi.org/10.1038/s41564-017-0012-7
PaGeD_00646	GCA_002419345.1	SAMN06457063	PRJNA348753	doi.org/10.1038/s41564-017-0012-7
PaGeD_00647	GCA_002419365.1	SAMN06457060	PRJNA348753	doi.org/10.1038/s41564-017-0012-7
PaGeD_00648	GCA_002419375.1	SAMN06457062	PRJNA348753	doi.org/10.1038/s41564-017-0012-7
PaGeD_00649	GCA_002419385.1	SAMN06453308	PRJNA348753	doi.org/10.1038/s41564-017-0012-7
PaGeD_00650	GCA_002419425.1	SAMN06457059	PRJNA348753	doi.org/10.1038/s41564-017-0012-7
PaGeD_00651	GCA_002419445.1	SAMN06457058	PRJNA348753	doi.org/10.1038/s41564-017-0012-7
PaGeD_00652	GCA_002419455.1	SAMN06457842	PRJNA348753	doi.org/10.1038/s41564-017-0012-7
PaGeD_00653	GCA_002419465.1	SAMN06457056	PRJNA348753	doi.org/10.1038/s41564-017-0012-7
PaGeD_00654	GCA_002419505.1	SAMN06452018	PRJNA348753	doi.org/10.1038/s41564-017-0012-7
PaGeD_00655	GCA_002419525.1	SAMN06452025	PRJNA348753	doi.org/10.1038/s41564-017-0012-7
PaGeD_00656	GCA_002419535.1	SAMN06452024	PRJNA348753	doi.org/10.1038/s41564-017-0012-7
PaGeD_00657	GCA_002419545.1	SAMN06452019	PRJNA348753	doi.org/10.1038/s41564-017-0012-7
PaGeD_00658	GCA_002419585.1	SAMN06452026	PRJNA348753	doi.org/10.1038/s41564-017-0012-7
PaGeD_00659	GCA_002421025.1	SAMN06452642	PRJNA348753	doi.org/10.1038/s41564-017-0012-7
PaGeD_00660	GCA_002421365.1	SAMN06452378	PRJNA348753	doi.org/10.1038/s41564-017-0012-7
PaGeD_00661	GCA_002421385.1	SAMN06452371	PRJNA348753	doi.org/10.1038/s41564-017-0012-7
PaGeD_00662	GCA_002421405.1	SAMN06452377	PRJNA348753	doi.org/10.1038/s41564-017-0012-7
PaGeD_00663	GCA_002421425.1	SAMN06455823	PRJNA348753	doi.org/10.1038/s41564-017-0012-7
PaGeD_00664	GCA_002421445.1	SAMN06456453	PRJNA348753	doi.org/10.1038/s41564-017-0012-7
PaGeD_00665	GCA_002421465.1	SAMN06452376	PRJNA348753	doi.org/10.1038/s41564-017-0012-7
PaGeD_00666	GCA_002421475.1	SAMN06455836	PRJNA348753	doi.org/10.1038/s41564-017-0012-7
PaGeD_00667	GCA_002421505.1	SAMN06456447	PRJNA348753	doi.org/10.1038/s41564-017-0012-7
PaGeD_00668	GCA_002421525.1	SAMN06456446	PRJNA348753	doi.org/10.1038/s41564-017-0012-7
PaGeD_00669	GCA_002421565.1	SAMN06456452	PRJNA348753	doi.org/10.1038/s41564-017-0012-7
PaGeD_00670	GCA_002421585.1	SAMN06456445	PRJNA348753	doi.org/10.1038/s41564-017-0012-7
PaGeD_00671	GCA_002421625.1	SAMN06456444	PRJNA348753	doi.org/10.1038/s41564-017-0012-7
PaGeD_00672	GCA_002422045.1	SAMN06457400	PRJNA348753	doi.org/10.1038/s41564-017-0012-7
PaGeD_00673	GCA_002422065.1	SAMN06454852	PRJNA348753	doi.org/10.1038/s41564-017-0012-7
PaGeD_00674	GCA_002422125.1	SAMN06457399	PRJNA348753	doi.org/10.1038/s41564-017-0012-7
PaGeD_00675	GCA_002422165.1	SAMN06454854	PRJNA348753	doi.org/10.1038/s41564-017-0012-7
PaGeD_00676	GCA_002422175.1	SAMN06456552	PRJNA348753	doi.org/10.1038/s41564-017-0012-7
PaGeD_00677	GCA_002422205.1	SAMN06456553	PRJNA348753	doi.org/10.1038/s41564-017-0012-7
PaGeD_00678	GCA_002422225.1	SAMN06456548	PRJNA348753	doi.org/10.1038/s41564-017-0012-7
PaGeD_00679	GCA_002422245.1	SAMN06456551	PRJNA348753	doi.org/10.1038/s41564-017-0012-7
PaGeD_00680	GCA_002422265.1	SAMN06452722	PRJNA348753	doi.org/10.1038/s41564-017-0012-7
PaGeD_00681	GCA_002422285.1	SAMN06452713	PRJNA348753	doi.org/10.1038/s41564-017-0012-7
PaGeD_00682	GCA_002422305.1	SAMN06452712	PRJNA348753	doi.org/10.1038/s41564-017-0012-7
PaGeD_00683	GCA_002422315.1	SAMN06452717	PRJNA348753	doi.org/10.1038/s41564-017-0012-7
PaGeD_00684	GCA_002422345.1	SAMN06453532	PRJNA348753	doi.org/10.1038/s41564-017-0012-7
PaGeD_00685	GCA_002422365.1	SAMN06454452	PRJNA348753	doi.org/10.1038/s41564-017-0012-7
PaGeD_00686	GCA_002422375.1	SAMN06453529	PRJNA348753	doi.org/10.1038/s41564-017-0012-7
PaGeD_00687	GCA_002422395.1	SAMN06453023	PRJNA348753	doi.org/10.1038/s41564-017-0012-7
PaGeD_00688	GCA_002422425.1	SAMN06453817	PRJNA348753	doi.org/10.1038/s41564-017-0012-7
PaGeD_00689	GCA_002422445.1	SAMN06452785	PRJNA348753	doi.org/10.1038/s41564-017-0012-7
PaGeD_00690	GCA_002422455.1	SAMN06452788	PRJNA348753	doi.org/10.1038/s41564-017-0012-7
PaGeD_00691	GCA_002422465.1	SAMN06453258	PRJNA348753	doi.org/10.1038/s41564-017-0012-7
PaGeD_00692	GCA_002422505.1	SAMN06453260	PRJNA348753	doi.org/10.1038/s41564-017-0012-7
PaGeD_00693	GCA_002422525.1	SAMN06454071	PRJNA348753	doi.org/10.1038/s41564-017-0012-7
PaGeD_00694	GCA_002422535.1	SAMN06453259	PRJNA348753	doi.org/10.1038/s41564-017-0012-7
PaGeD_00695	GCA_002422545.1	SAMN06454066	PRJNA348753	doi.org/10.1038/s41564-017-0012-7
PaGeD_00696	GCA_002422585.1	SAMN06451555	PRJNA348753	doi.org/10.1038/s41564-017-0012-7
PaGeD_00697	GCA_002422725.1	SAMN06457402	PRJNA348753	doi.org/10.1038/s41564-017-0012-7
PaGeD_00698	GCA_002422745.1	SAMN06454851	PRJNA348753	doi.org/10.1038/s41564-017-0012-7
PaGeD_00699	GCA_002422765.1	SAMN06454850	PRJNA348753	doi.org/10.1038/s41564-017-0012-7
PaGeD_00700	GCA_002422785.1	SAMN06454856	PRJNA348753	doi.org/10.1038/s41564-017-0012-7
PaGeD_00701	GCA_002422795.1	SAMN06454857	PRJNA348753	doi.org/10.1038/s41564-017-0012-7
PaGeD_00702	GCA_002422825.1	SAMN06454859	PRJNA348753	doi.org/10.1038/s41564-017-0012-7
PaGeD_00703	GCA_002422845.1	SAMN06454858	PRJNA348753	doi.org/10.1038/s41564-017-0012-7
PaGeD_00704	GCA_002422865.1	SAMN06454853	PRJNA348753	doi.org/10.1038/s41564-017-0012-7
PaGeD_00705	GCA_002422875.1	SAMN06456544	PRJNA348753	doi.org/10.1038/s41564-017-0012-7
PaGeD_00706	GCA_002422905.1	SAMN06456545	PRJNA348753	doi.org/10.1038/s41564-017-0012-7
PaGeD_00707	GCA_002422915.1	SAMN06456546	PRJNA348753	doi.org/10.1038/s41564-017-0012-7
PaGeD_00708	GCA_002422945.1	SAMN06456547	PRJNA348753	doi.org/10.1038/s41564-017-0012-7
PaGeD_00709	GCA_002422955.1	SAMN06456549	PRJNA348753	doi.org/10.1038/s41564-017-0012-7
PaGeD_00710	GCA_002422985.1	SAMN06456550	PRJNA348753	doi.org/10.1038/s41564-017-0012-7
PaGeD_00711	GCA_002422995.1	SAMN06452716	PRJNA348753	doi.org/10.1038/s41564-017-0012-7
PaGeD_00712	GCA_002423025.1	SAMN06457847	PRJNA348753	doi.org/10.1038/s41564-017-0012-7
PaGeD_00713	GCA_002423035.1	SAMN06457858	PRJNA348753	doi.org/10.1038/s41564-017-0012-7
PaGeD_00714	GCA_002423065.1	SAMN06453528	PRJNA348753	doi.org/10.1038/s41564-017-0012-7
PaGeD_00715	GCA_002423075.1	SAMN06453527	PRJNA348753	doi.org/10.1038/s41564-017-0012-7
PaGeD_00716	GCA_002423105.1	SAMN06453524	PRJNA348753	doi.org/10.1038/s41564-017-0012-7
PaGeD_00717	GCA_002423125.1	SAMN06453021	PRJNA348753	doi.org/10.1038/s41564-017-0012-7
PaGeD_00718	GCA_002423145.1	SAMN06453525	PRJNA348753	doi.org/10.1038/s41564-017-0012-7
PaGeD_00719	GCA_002423155.1	SAMN06453022	PRJNA348753	doi.org/10.1038/s41564-017-0012-7
PaGeD_00720	GCA_002423185.1	SAMN06451051	PRJNA348753	doi.org/10.1038/s41564-017-0012-7
PaGeD_00721	GCA_002423205.1	SAMN06453026	PRJNA348753	doi.org/10.1038/s41564-017-0012-7
PaGeD_00722	GCA_002423225.1	SAMN06451066	PRJNA348753	doi.org/10.1038/s41564-017-0012-7
PaGeD_00723	GCA_002423245.1	SAMN06451068	PRJNA348753	doi.org/10.1038/s41564-017-0012-7
PaGeD_00724	GCA_002423265.1	SAMN06451067	PRJNA348753	doi.org/10.1038/s41564-017-0012-7
PaGeD_00725	GCA_002423285.1	SAMN06453816	PRJNA348753	doi.org/10.1038/s41564-017-0012-7
PaGeD_00726	GCA_002423305.1	SAMN06453824	PRJNA348753	doi.org/10.1038/s41564-017-0012-7
PaGeD_00727	GCA_002423325.1	SAMN06453257	PRJNA348753	doi.org/10.1038/s41564-017-0012-7
PaGeD_00728	GCA_002423365.1	SAMN06453263	PRJNA348753	doi.org/10.1038/s41564-017-0012-7
PaGeD_00729	GCA_002423385.1	SAMN06453262	PRJNA348753	doi.org/10.1038/s41564-017-0012-7
PaGeD_00730	GCA_002423395.1	SAMN06454070	PRJNA348753	doi.org/10.1038/s41564-017-0012-7
PaGeD_00731	GCA_002423425.1	SAMN06454762	PRJNA348753	doi.org/10.1038/s41564-017-0012-7
PaGeD_00732	GCA_002423435.1	SAMN06454061	PRJNA348753	doi.org/10.1038/s41564-017-0012-7
PaGeD_00733	GCA_002423465.1	SAMN06454067	PRJNA348753	doi.org/10.1038/s41564-017-0012-7
PaGeD_00734	GCA_002423485.1	SAMN06454064	PRJNA348753	doi.org/10.1038/s41564-017-0012-7
PaGeD_00735	GCA_002423495.1	SAMN06451878	PRJNA348753	doi.org/10.1038/s41564-017-0012-7
PaGeD_00736	GCA_002423525.1	SAMN06451551	PRJNA348753	doi.org/10.1038/s41564-017-0012-7
PaGeD_00737	GCA_002423545.1	SAMN06455460	PRJNA348753	doi.org/10.1038/s41564-017-0012-7
PaGeD_00738	GCA_002423555.1	SAMN06455459	PRJNA348753	doi.org/10.1038/s41564-017-0012-7
PaGeD_00739	GCA_002423585.1	SAMN06455461	PRJNA348753	doi.org/10.1038/s41564-017-0012-7
PaGeD_00740	GCA_002423605.1	SAMN06456450	PRJNA348753	doi.org/10.1038/s41564-017-0012-7
PaGeD_00741	GCA_002423615.1	SAMN06451147	PRJNA348753	doi.org/10.1038/s41564-017-0012-7
PaGeD_00742	GCA_002423645.1	SAMN06451148	PRJNA348753	doi.org/10.1038/s41564-017-0012-7
PaGeD_00743	GCA_002423905.1	SAMN06451062	PRJNA348753	doi.org/10.1038/s41564-017-0012-7
PaGeD_00744	GCA_002424475.1	SAMN06456448	PRJNA348753	doi.org/10.1038/s41564-017-0012-7
PaGeD_00745	GCA_002424495.1	SAMN06456449	PRJNA348753	doi.org/10.1038/s41564-017-0012-7
PaGeD_00746	GCA_002424525.1	SAMN06456451	PRJNA348753	doi.org/10.1038/s41564-017-0012-7
PaGeD_00747	GCA_002424545.1	SAMN06451144	PRJNA348753	doi.org/10.1038/s41564-017-0012-7
PaGeD_00748	GCA_002424565.1	SAMN06452065	PRJNA348753	doi.org/10.1038/s41564-017-0012-7
PaGeD_00749	GCA_002424575.1	SAMN06451146	PRJNA348753	doi.org/10.1038/s41564-017-0012-7
PaGeD_00750	GCA_002424605.1	SAMN06451149	PRJNA348753	doi.org/10.1038/s41564-017-0012-7
PaGeD_00751	GCA_002424625.1	SAMN06452067	PRJNA348753	doi.org/10.1038/s41564-017-0012-7
PaGeD_00752	GCA_002424635.1	SAMN06451152	PRJNA348753	doi.org/10.1038/s41564-017-0012-7
PaGeD_00753	GCA_002424645.1	SAMN06451153	PRJNA348753	doi.org/10.1038/s41564-017-0012-7
PaGeD_00754	GCA_002424655.1	SAMN06452068	PRJNA348753	doi.org/10.1038/s41564-017-0012-7
PaGeD_00755	GCA_002424705.1	SAMN06456193	PRJNA348753	doi.org/10.1038/s41564-017-0012-7
PaGeD_00756	GCA_002424715.1	SAMN06456194	PRJNA348753	doi.org/10.1038/s41564-017-0012-7
PaGeD_00757	GCA_002424725.1	SAMN06456200	PRJNA348753	doi.org/10.1038/s41564-017-0012-7
PaGeD_00758	GCA_002424765.1	SAMN06456199	PRJNA348753	doi.org/10.1038/s41564-017-0012-7
PaGeD_00759	GCA_002424785.1	SAMN06455047	PRJNA348753	doi.org/10.1038/s41564-017-0012-7
PaGeD_00760	GCA_002424805.1	SAMN06456197	PRJNA348753	doi.org/10.1038/s41564-017-0012-7
PaGeD_00761	GCA_002424815.1	SAMN06456204	PRJNA348753	doi.org/10.1038/s41564-017-0012-7
PaGeD_00762	GCA_002424845.1	SAMN06456202	PRJNA348753	doi.org/10.1038/s41564-017-0012-7
PaGeD_00763	GCA_002424865.1	SAMN06456203	PRJNA348753	doi.org/10.1038/s41564-017-0012-7
PaGeD_00764	GCA_002424885.1	SAMN06455921	PRJNA348753	doi.org/10.1038/s41564-017-0012-7
PaGeD_00765	GCA_002424895.1	SAMN06456201	PRJNA348753	doi.org/10.1038/s41564-017-0012-7
PaGeD_00766	GCA_002424905.1	SAMN06455920	PRJNA348753	doi.org/10.1038/s41564-017-0012-7
PaGeD_00767	GCA_002427615.1	SAMN06454541	PRJNA348753	doi.org/10.1038/s41564-017-0012-7
PaGeD_00768	GCA_002427655.1	SAMN06454157	PRJNA348753	doi.org/10.1038/s41564-017-0012-7
PaGeD_00769	GCA_002427685.1	SAMN06452375	PRJNA348753	doi.org/10.1038/s41564-017-0012-7
PaGeD_00770	GCA_002428205.1	SAMN06452719	PRJNA348753	doi.org/10.1038/s41564-017-0012-7
PaGeD_00771	GCA_002428215.1	SAMN06452718	PRJNA348753	doi.org/10.1038/s41564-017-0012-7
PaGeD_00772	GCA_002428225.1	SAMN06457132	PRJNA348753	doi.org/10.1038/s41564-017-0012-7
PaGeD_00773	GCA_002428265.1	SAMN06453526	PRJNA348753	doi.org/10.1038/s41564-017-0012-7
PaGeD_00774	GCA_002428285.1	SAMN06452784	PRJNA348753	doi.org/10.1038/s41564-017-0012-7
PaGeD_00775	GCA_002428295.1	SAMN06453265	PRJNA348753	doi.org/10.1038/s41564-017-0012-7
PaGeD_00776	GCA_002428305.1	SAMN06453825	PRJNA348753	doi.org/10.1038/s41564-017-0012-7
PaGeD_00777	GCA_002428325.1	SAMN06453266	PRJNA348753	doi.org/10.1038/s41564-017-0012-7
PaGeD_00778	GCA_002428365.1	SAMN06453261	PRJNA348753	doi.org/10.1038/s41564-017-0012-7
PaGeD_00779	GCA_002428385.1	SAMN06454062	PRJNA348753	doi.org/10.1038/s41564-017-0012-7
PaGeD_00780	GCA_002428405.1	SAMN06454759	PRJNA348753	doi.org/10.1038/s41564-017-0012-7
PaGeD_00781	GCA_002428415.1	SAMN06454065	PRJNA348753	doi.org/10.1038/s41564-017-0012-7
PaGeD_00782	GCA_002428445.1	SAMN06451556	PRJNA348753	doi.org/10.1038/s41564-017-0012-7
PaGeD_00783	GCA_002428455.1	SAMN06451550	PRJNA348753	doi.org/10.1038/s41564-017-0012-7
PaGeD_00784	GCA_002428485.1	SAMN06451549	PRJNA348753	doi.org/10.1038/s41564-017-0012-7
PaGeD_00785	GCA_002428495.1	SAMN06455158	PRJNA348753	doi.org/10.1038/s41564-017-0012-7
PaGeD_00786	GCA_002428525.1	SAMN06453689	PRJNA348753	doi.org/10.1038/s41564-017-0012-7
PaGeD_00787	GCA_002428535.1	SAMN06453686	PRJNA348753	doi.org/10.1038/s41564-017-0012-7
PaGeD_00788	GCA_002428565.1	SAMN06453683	PRJNA348753	doi.org/10.1038/s41564-017-0012-7
PaGeD_00789	GCA_002428575.1	SAMN06453682	PRJNA348753	doi.org/10.1038/s41564-017-0012-7
PaGeD_00790	GCA_002428605.1	SAMN06452885	PRJNA348753	doi.org/10.1038/s41564-017-0012-7
PaGeD_00791	GCA_002428625.1	SAMN06452886	PRJNA348753	doi.org/10.1038/s41564-017-0012-7
PaGeD_00792	GCA_002428635.1	SAMN06452888	PRJNA348753	doi.org/10.1038/s41564-017-0012-7
PaGeD_00793	GCA_002428665.1	SAMN06452880	PRJNA348753	doi.org/10.1038/s41564-017-0012-7
PaGeD_00794	GCA_002428685.1	SAMN06452881	PRJNA348753	doi.org/10.1038/s41564-017-0012-7
PaGeD_00795	GCA_002428705.1	SAMN06455611	PRJNA348753	doi.org/10.1038/s41564-017-0012-7
PaGeD_00796	GCA_002428725.1	SAMN06455612	PRJNA348753	doi.org/10.1038/s41564-017-0012-7
PaGeD_00797	GCA_002428735.1	SAMN06455610	PRJNA348753	doi.org/10.1038/s41564-017-0012-7
PaGeD_00798	GCA_002428765.1	SAMN06455615	PRJNA348753	doi.org/10.1038/s41564-017-0012-7
PaGeD_00799	GCA_002428785.1	SAMN06455614	PRJNA348753	doi.org/10.1038/s41564-017-0012-7
PaGeD_00800	GCA_002435665.1	SAMN06452651	PRJNA348753	doi.org/10.1038/s41564-017-0012-7
PaGeD_00801	GCA_002435705.1	SAMN06453025	PRJNA348753	doi.org/10.1038/s41564-017-0012-7
PaGeD_00802	GCA_002435745.1	SAMN06453690	PRJNA348753	doi.org/10.1038/s41564-017-0012-7
PaGeD_00803	GCA_002435785.1	SAMN06452721	PRJNA348753	doi.org/10.1038/s41564-017-0012-7
PaGeD_00804	GCA_002435795.1	SAMN06452714	PRJNA348753	doi.org/10.1038/s41564-017-0012-7
PaGeD_00805	GCA_002435825.1	SAMN06453819	PRJNA348753	doi.org/10.1038/s41564-017-0012-7
PaGeD_00806	GCA_002435835.1	SAMN06452782	PRJNA348753	doi.org/10.1038/s41564-017-0012-7
PaGeD_00807	GCA_002435865.1	SAMN06453688	PRJNA348753	doi.org/10.1038/s41564-017-0012-7
PaGeD_00808	GCA_002435875.1	SAMN06452783	PRJNA348753	doi.org/10.1038/s41564-017-0012-7
PaGeD_00809	GCA_002435905.1	SAMN06453687	PRJNA348753	doi.org/10.1038/s41564-017-0012-7
PaGeD_00810	GCA_002435915.1	SAMN06453685	PRJNA348753	doi.org/10.1038/s41564-017-0012-7
PaGeD_00811	GCA_002435945.1	SAMN06453681	PRJNA348753	doi.org/10.1038/s41564-017-0012-7
PaGeD_00812	GCA_002435955.1	SAMN06453684	PRJNA348753	doi.org/10.1038/s41564-017-0012-7
PaGeD_00813	GCA_002435985.1	SAMN06452887	PRJNA348753	doi.org/10.1038/s41564-017-0012-7
PaGeD_00814	GCA_002436005.1	SAMN06452884	PRJNA348753	doi.org/10.1038/s41564-017-0012-7
PaGeD_00815	GCA_002436015.1	SAMN06452879	PRJNA348753	doi.org/10.1038/s41564-017-0012-7
PaGeD_00816	GCA_002436025.1	SAMN06452882	PRJNA348753	doi.org/10.1038/s41564-017-0012-7
PaGeD_00817	GCA_002436065.1	SAMN06455613	PRJNA348753	doi.org/10.1038/s41564-017-0012-7
PaGeD_00818	GCA_002436085.1	SAMN06455617	PRJNA348753	doi.org/10.1038/s41564-017-0012-7
PaGeD_00819	GCA_002436105.1	SAMN06455616	PRJNA348753	doi.org/10.1038/s41564-017-0012-7
PaGeD_00820	GCA_002438375.1	SAMN06452174	PRJNA348753	doi.org/10.1038/s41564-017-0012-7
PaGeD_00821	GCA_002439355.1	SAMN06454403	PRJNA348753	doi.org/10.1038/s41564-017-0012-7
PaGeD_00822	GCA_002448235.1	SAMN06452883	PRJNA348753	doi.org/10.1038/s41564-017-0012-7
PaGeD_00823	GCA_002454705.1	SAMN06450479	PRJNA348753	doi.org/10.1038/s41564-017-0012-7
PaGeD_00824	GCA_002470045.1	SAMN06453140	PRJNA348753	doi.org/10.1038/s41564-017-0012-7
PaGeD_00825	GCA_002476865.1	SAMN06455579	PRJNA348753	doi.org/10.1126/science.aac7745
PaGeD_00826	GCA_002476915.1	SAMN06451803	PRJNA348753	doi.org/10.1038/s41564-017-0012-7
PaGeD_00827	GCA_002477355.1	SAMN06451986	PRJNA348753	doi.org/10.1038/s41564-017-0012-7
PaGeD_00828	GCA_002478225.1	SAMN06455582	PRJNA348753	doi.org/10.1126/science.aac7745
PaGeD_00829	GCA_002478245.1	SAMN06455583	PRJNA348753	doi.org/10.1126/science.aac7745
PaGeD_00830	GCA_002478265.1	SAMN06455581	PRJNA348753	doi.org/10.1126/science.aac7745
PaGeD_00831	GCA_002478275.1	SAMN06455585	PRJNA348753	doi.org/10.1126/science.aac7745
PaGeD_00832	GCA_002479405.1	SAMN06455584	PRJNA348753	doi.org/10.1126/science.aac7745
PaGeD_00833	GCA_002479415.1	SAMN06455578	PRJNA348753	doi.org/10.1126/science.aac7745
PaGeD_00834	GCA_002479455.1	SAMN06455580	PRJNA348753	doi.org/10.1126/science.aac7745
PaGeD_00835	GCA_002482195.1	SAMN06456252	PRJNA348753	doi.org/10.1038/s41564-017-0012-7
PaGeD_00836	GCA_002494745.1	SAMN06027414	PRJNA348753	doi.org/10.1038/s41564-017-0012-7
PaGeD_00837	GCA_002494765.1	SAMN06027450	PRJNA348753	doi.org/10.1016/j.margen.2014.06.003
PaGeD_00838	GCA_002494785.1	SAMN06027415	PRJNA348753	doi.org/10.1038/s41564-017-0012-7
PaGeD_00839	GCA_002494795.1	SAMN06027417	PRJNA348753	doi.org/10.1038/s41564-017-0012-7
PaGeD_00840	GCA_002495065.1	SAMN06027617	PRJNA348753	doi.org/10.1038/s41564-017-0012-7
PaGeD_00841	GCA_002496255.1	SAMN06027610	PRJNA348753	doi.org/10.1038/s41564-017-0012-7
PaGeD_00842	GCA_002497075.1	SAMN06027620	PRJNA348753	doi.org/10.1038/s41564-017-0012-7
PaGeD_00843	GCA_002501695.1	SAMN06027622	PRJNA348753	doi.org/10.1038/s41564-017-0012-7
PaGeD_00844	GCA_002503525.1	SAMN06027052	PRJNA348753	doi.org/10.1038/s41564-017-0012-7
PaGeD_00845	GCA_002503825.1	SAMN06027139	PRJNA348753	doi.org/10.1038/s41564-017-0012-7
PaGeD_00846	GCA_002503885.1	SAMN06027135	PRJNA348753	doi.org/10.1038/s41564-017-0012-7
PaGeD_00847	GCA_002504725.1	SAMN06027046	PRJNA348753	doi.org/10.1126/science.aac7745
PaGeD_00848	GCA_002505945.1	SAMN06027413	PRJNA348753	doi.org/10.1038/s41564-017-0012-7
PaGeD_00849	GCA_002508425.1	SAMN06027602	PRJNA348753	doi.org/10.1038/s41564-017-0012-7
PaGeD_00850	GCA_002508635.1	SAMN06027412	PRJNA348753	doi.org/10.1038/s41564-017-0012-7
PaGeD_00851	GCA_002509085.1	SAMN06027049	PRJNA348753	doi.org/10.1126/science.aac7745
PaGeD_00852	GCA_002509245.1	SAMN06027048	PRJNA348753	doi.org/10.1126/science.aac7745
PaGeD_00853	GCA_002509345.1	SAMN06027136	PRJNA348753	doi.org/10.1038/s41564-017-0012-7
PaGeD_00854	GCA_002509495.1	SAMN06027619	PRJNA348753	doi.org/10.1038/s41564-017-0012-7
PaGeD_00855	GCA_002631855.1	SAMN07255348	PRJNA329908	doi.org/10.1038/ismej.2017.129
PaGeD_00856	GCA_002631945.1	SAMN07255343	PRJNA329908	doi.org/10.1038/ismej.2017.129
PaGeD_00857	GCA_002631975.1	SAMN07255338	PRJNA329908	doi.org/10.1038/ismej.2017.129
PaGeD_00858	GCA_002632005.1	SAMN07255337	PRJNA329908	doi.org/10.1038/ismej.2017.129
PaGeD_00859	GCA_002632025.1	SAMN07255336	PRJNA329908	doi.org/10.1038/ismej.2017.129
PaGeD_00860	GCA_002632055.1	SAMN07255332	PRJNA329908	doi.org/10.1038/ismej.2017.129
PaGeD_00861	GCA_002632075.1	SAMN07255331	PRJNA329908	doi.org/10.1038/ismej.2017.129
PaGeD_00862	GCA_002632135.1	SAMN07255345	PRJNA329908	doi.org/10.1038/ismej.2017.129
PaGeD_00863	GCA_002632185.1	SAMN07255342	PRJNA329908	doi.org/10.1038/ismej.2017.129
PaGeD_00864	GCA_002632235.1	SAMN07255333	PRJNA329908	doi.org/10.1038/ismej.2017.129
PaGeD_00865	GCA_003641345.1	SAMN09215311	PRJNA362212	doi.org/10.1038/s41467-019-09364-x
PaGeD_00866	GCA_003641355.1	SAMN09214985	PRJNA362212	doi.org/10.1038/s41467-019-09364-x
PaGeD_00867	GCA_003641365.1	SAMN09215126	PRJNA362212	doi.org/10.1038/s41467-019-09364-x
PaGeD_00868	GCA_003641405.1	SAMN09214826	PRJNA362212	doi.org/10.1038/s41467-019-09364-x
PaGeD_00869	GCA_003641415.1	SAMN09215310	PRJNA362212	doi.org/10.1038/s41467-019-09364-x
PaGeD_00870	GCA_003641425.1	SAMN09215309	PRJNA362212	doi.org/10.1038/s41467-019-09364-x
PaGeD_00871	GCA_003641465.1	SAMN09215306	PRJNA362212	doi.org/10.1038/s41467-019-09364-x
PaGeD_00872	GCA_003641485.1	SAMN09215124	PRJNA362212	doi.org/10.1038/s41467-019-09364-x
PaGeD_00873	GCA_003641495.1	SAMN09215123	PRJNA362212	doi.org/10.1038/s41467-019-09364-x
PaGeD_00874	GCA_003641505.1	SAMN09215304	PRJNA362212	doi.org/10.1038/s41467-019-09364-x
PaGeD_00875	GCA_003641545.1	SAMN09215302	PRJNA362212	doi.org/10.1038/s41467-019-09364-x
PaGeD_00876	GCA_003641555.1	SAMN09214853	PRJNA362212	doi.org/10.1038/s41467-019-09364-x
PaGeD_00877	GCA_003641585.1	SAMN09215086	PRJNA362212	doi.org/10.1038/s41467-019-09364-x
PaGeD_00878	GCA_003641595.1	SAMN09215085	PRJNA362212	doi.org/10.1038/s41467-019-09364-x
PaGeD_00879	GCA_003641605.1	SAMN09214980	PRJNA362212	doi.org/10.1038/s41467-019-09364-x
PaGeD_00880	GCA_003641645.1	SAMN09214901	PRJNA362212	doi.org/10.1038/s41467-019-09364-x
PaGeD_00881	GCA_003641665.1	SAMN09215298	PRJNA362212	doi.org/10.1038/s41467-019-09364-x
PaGeD_00882	GCA_003641675.1	SAMN09215297	PRJNA362212	doi.org/10.1038/s41467-019-09364-x
PaGeD_00883	GCA_003641695.1	SAMN09215294	PRJNA362212	doi.org/10.1038/s41467-019-09364-x
PaGeD_00884	GCA_003641715.1	SAMN09215170	PRJNA362212	doi.org/10.1038/s41467-019-09364-x
PaGeD_00885	GCA_003641745.1	SAMN09215125	PRJNA362212	doi.org/10.1038/s41467-019-09364-x
PaGeD_00886	GCA_003641755.1	SAMN09215303	PRJNA362212	doi.org/10.1038/s41467-019-09364-x
PaGeD_00887	GCA_003641785.1	SAMN09214854	PRJNA362212	doi.org/10.1038/s41467-019-09364-x
PaGeD_00888	GCA_003641795.1	SAMN09214902	PRJNA362212	doi.org/10.1038/s41467-019-09364-x
PaGeD_00889	GCA_003643825.1	SAMN09215287	PRJNA362212	doi.org/10.1038/s41467-019-09364-x
PaGeD_00890	GCA_003643835.1	SAMN09215151	PRJNA362212	doi.org/10.1038/s41467-019-09364-x
PaGeD_00891	GCA_003643855.1	SAMN09214975	PRJNA362212	doi.org/10.1038/s41467-019-09364-x
PaGeD_00892	GCA_003643875.1	SAMN09214833	PRJNA362212	doi.org/10.1038/s41467-019-09364-x
PaGeD_00893	GCA_003643895.1	SAMN09215284	PRJNA362212	doi.org/10.1038/s41467-019-09364-x
PaGeD_00894	GCA_003643925.1	SAMN09214973	PRJNA362212	doi.org/10.1038/s41467-019-09364-x
PaGeD_00895	GCA_003643935.1	SAMN09215282	PRJNA362212	doi.org/10.1038/s41467-019-09364-x
PaGeD_00896	GCA_003643965.1	SAMN09215173	PRJNA362212	doi.org/10.1038/s41467-019-09364-x
PaGeD_00897	GCA_003643975.1	SAMN09215172	PRJNA362212	doi.org/10.1038/s41467-019-09364-x
PaGeD_00898	GCA_003643985.1	SAMN09214821	PRJNA362212	doi.org/10.1038/s41467-019-09364-x
PaGeD_00899	GCA_003644025.1	SAMN09215171	PRJNA362212	doi.org/10.1038/s41467-019-09364-x
PaGeD_00900	GCA_003644035.1	SAMN09215122	PRJNA362212	doi.org/10.1038/s41467-019-09364-x
PaGeD_00901	GCA_003644055.1	SAMN09214852	PRJNA362212	doi.org/10.1038/s41467-019-09364-x
PaGeD_00902	GCA_003644085.1	SAMN09215121	PRJNA362212	doi.org/10.1038/s41467-019-09364-x
PaGeD_00903	GCA_003644095.1	SAMN09215083	PRJNA362212	doi.org/10.1038/s41467-019-09364-x
PaGeD_00904	GCA_003644105.1	SAMN09215295	PRJNA362212	doi.org/10.1038/s41467-019-09364-x
PaGeD_00905	GCA_003644145.1	SAMN09214976	PRJNA362212	doi.org/10.1038/s41467-019-09364-x
PaGeD_00906	GCA_003644155.1	SAMN09215075	PRJNA362212	doi.org/10.1038/s41467-019-09364-x
PaGeD_00907	GCA_003644175.1	SAMN09214965	PRJNA362212	doi.org/10.1038/s41467-019-09364-x
PaGeD_00908	GCA_003644205.1	SAMN09214964	PRJNA362212	doi.org/10.1038/s41467-019-09364-x
PaGeD_00909	GCA_003644215.1	SAMN09214812	PRJNA362212	doi.org/10.1038/s41467-019-09364-x
PaGeD_00910	GCA_003644235.1	SAMN09215021	PRJNA362212	doi.org/10.1038/s41467-019-09364-x
PaGeD_00911	GCA_003644265.1	SAMN09215100	PRJNA362212	doi.org/10.1038/s41467-019-09364-x
PaGeD_00912	GCA_003644275.1	SAMN09215267	PRJNA362212	doi.org/10.1038/s41467-019-09364-x
PaGeD_00913	GCA_003644295.1	SAMN09215266	PRJNA362212	doi.org/10.1038/s41467-019-09364-x
PaGeD_00914	GCA_003644325.1	SAMN09215265	PRJNA362212	doi.org/10.1038/s41467-019-09364-x
PaGeD_00915	GCA_003644335.1	SAMN09215264	PRJNA362212	doi.org/10.1038/s41467-019-09364-x
PaGeD_00916	GCA_003644345.1	SAMN09215262	PRJNA362212	doi.org/10.1038/s41467-019-09364-x
PaGeD_00917	GCA_003644385.1	SAMN09214962	PRJNA362212	doi.org/10.1038/s41467-019-09364-x
PaGeD_00918	GCA_003644395.1	SAMN09215261	PRJNA362212	doi.org/10.1038/s41467-019-09364-x
PaGeD_00919	GCA_003644405.1	SAMN09214961	PRJNA362212	doi.org/10.1038/s41467-019-09364-x
PaGeD_00920	GCA_003644445.1	SAMN09214896	PRJNA362212	doi.org/10.1038/s41467-019-09364-x
PaGeD_00921	GCA_003644455.1	SAMN09214895	PRJNA362212	doi.org/10.1038/s41467-019-09364-x
PaGeD_00922	GCA_003644465.1	SAMN09214893	PRJNA362212	doi.org/10.1038/s41467-019-09364-x
PaGeD_00923	GCA_003644505.1	SAMN09215259	PRJNA362212	doi.org/10.1038/s41467-019-09364-x
PaGeD_00924	GCA_003644515.1	SAMN09215258	PRJNA362212	doi.org/10.1038/s41467-019-09364-x
PaGeD_00925	GCA_003644525.1	SAMN09214960	PRJNA362212	doi.org/10.1038/s41467-019-09364-x
PaGeD_00926	GCA_003644565.1	SAMN09215254	PRJNA362212	doi.org/10.1038/s41467-019-09364-x
PaGeD_00927	GCA_003644575.1	SAMN09214956	PRJNA362212	doi.org/10.1038/s41467-019-09364-x
PaGeD_00928	GCA_003644595.1	SAMN09214955	PRJNA362212	doi.org/10.1038/s41467-019-09364-x
PaGeD_00929	GCA_003644625.1	SAMN09215253	PRJNA362212	doi.org/10.1038/s41467-019-09364-x
PaGeD_00930	GCA_003644635.1	SAMN09214889	PRJNA362212	doi.org/10.1038/s41467-019-09364-x
PaGeD_00931	GCA_003644665.1	SAMN09214888	PRJNA362212	doi.org/10.1038/s41467-019-09364-x
PaGeD_00932	GCA_003644685.1	SAMN09215019	PRJNA362212	doi.org/10.1038/s41467-019-09364-x
PaGeD_00933	GCA_003644695.1	SAMN09215249	PRJNA362212	doi.org/10.1038/s41467-019-09364-x
PaGeD_00934	GCA_003644715.1	SAMN09215248	PRJNA362212	doi.org/10.1038/s41467-019-09364-x
PaGeD_00935	GCA_003644735.1	SAMN09215073	PRJNA362212	doi.org/10.1038/s41467-019-09364-x
PaGeD_00936	GCA_003644765.1	SAMN09215072	PRJNA362212	doi.org/10.1038/s41467-019-09364-x
PaGeD_00937	GCA_003644775.1	SAMN09215247	PRJNA362212	doi.org/10.1038/s41467-019-09364-x
PaGeD_00938	GCA_003644785.1	SAMN09214887	PRJNA362212	doi.org/10.1038/s41467-019-09364-x
PaGeD_00939	GCA_003644825.1	SAMN09214953	PRJNA362212	doi.org/10.1038/s41467-019-09364-x
PaGeD_00940	GCA_003644835.1	SAMN09214831	PRJNA362212	doi.org/10.1038/s41467-019-09364-x
PaGeD_00941	GCA_003644845.1	SAMN09214807	PRJNA362212	doi.org/10.1038/s41467-019-09364-x
PaGeD_00942	GCA_003644885.1	SAMN09215243	PRJNA362212	doi.org/10.1038/s41467-019-09364-x
PaGeD_00943	GCA_003644895.1	SAMN09214949	PRJNA362212	doi.org/10.1038/s41467-019-09364-x
PaGeD_00944	GCA_003644925.1	SAMN09215099	PRJNA362212	doi.org/10.1038/s41467-019-09364-x
PaGeD_00945	GCA_003644935.1	SAMN09215199	PRJNA362212	doi.org/10.1038/s41467-019-09364-x
PaGeD_00946	GCA_003644945.1	SAMN09215140	PRJNA362212	doi.org/10.1038/s41467-019-09364-x
PaGeD_00947	GCA_003644985.1	SAMN09215094	PRJNA362212	doi.org/10.1038/s41467-019-09364-x
PaGeD_00948	GCA_003644995.1	SAMN09214922	PRJNA362212	doi.org/10.1038/s41467-019-09364-x
PaGeD_00949	GCA_003645025.1	SAMN09214994	PRJNA362212	doi.org/10.1038/s41467-019-09364-x
PaGeD_00950	GCA_003645045.1	SAMN09214868	PRJNA362212	doi.org/10.1038/s41467-019-09364-x
PaGeD_00951	GCA_003645055.1	SAMN09215198	PRJNA362212	doi.org/10.1038/s41467-019-09364-x
PaGeD_00952	GCA_003645085.1	SAMN09214921	PRJNA362212	doi.org/10.1038/s41467-019-09364-x
PaGeD_00953	GCA_003645105.1	SAMN09215197	PRJNA362212	doi.org/10.1038/s41467-019-09364-x
PaGeD_00954	GCA_003645115.1	SAMN09214919	PRJNA362212	doi.org/10.1038/s41467-019-09364-x
PaGeD_00955	GCA_003645125.1	SAMN09215196	PRJNA362212	doi.org/10.1038/s41467-019-09364-x
PaGeD_00956	GCA_003645165.1	SAMN09214836	PRJNA362212	doi.org/10.1038/s41467-019-09364-x
PaGeD_00957	GCA_003645175.1	SAMN09215081	PRJNA362212	doi.org/10.1038/s41467-019-09364-x
PaGeD_00958	GCA_003645185.1	SAMN09215169	PRJNA362212	doi.org/10.1038/s41467-019-09364-x
PaGeD_00959	GCA_003645215.1	SAMN09215168	PRJNA362212	doi.org/10.1038/s41467-019-09364-x
PaGeD_00960	GCA_003645245.1	SAMN09215291	PRJNA362212	doi.org/10.1038/s41467-019-09364-x
PaGeD_00961	GCA_003645255.1	SAMN09215165	PRJNA362212	doi.org/10.1038/s41467-019-09364-x
PaGeD_00962	GCA_003645265.1	SAMN09215120	PRJNA362212	doi.org/10.1038/s41467-019-09364-x
PaGeD_00963	GCA_003645305.1	SAMN09215163	PRJNA362212	doi.org/10.1038/s41467-019-09364-x
PaGeD_00964	GCA_003645315.1	SAMN09214851	PRJNA362212	doi.org/10.1038/s41467-019-09364-x
PaGeD_00965	GCA_003645335.1	SAMN09215162	PRJNA362212	doi.org/10.1038/s41467-019-09364-x
PaGeD_00966	GCA_003645345.1	SAMN09215119	PRJNA362212	doi.org/10.1038/s41467-019-09364-x
PaGeD_00967	GCA_003645385.1	SAMN09215080	PRJNA362212	doi.org/10.1038/s41467-019-09364-x
PaGeD_00968	GCA_003645395.1	SAMN09215117	PRJNA362212	doi.org/10.1038/s41467-019-09364-x
PaGeD_00969	GCA_003645405.1	SAMN09215118	PRJNA362212	doi.org/10.1038/s41467-019-09364-x
PaGeD_00970	GCA_003645435.1	SAMN09215116	PRJNA362212	doi.org/10.1038/s41467-019-09364-x
PaGeD_00971	GCA_003645455.1	SAMN09215160	PRJNA362212	doi.org/10.1038/s41467-019-09364-x
PaGeD_00972	GCA_003645485.1	SAMN09215289	PRJNA362212	doi.org/10.1038/s41467-019-09364-x
PaGeD_00973	GCA_003645495.1	SAMN09214835	PRJNA362212	doi.org/10.1038/s41467-019-09364-x
PaGeD_00974	GCA_003645525.1	SAMN09215113	PRJNA362212	doi.org/10.1038/s41467-019-09364-x
PaGeD_00975	GCA_003645535.1	SAMN09215155	PRJNA362212	doi.org/10.1038/s41467-019-09364-x
PaGeD_00976	GCA_003645555.1	SAMN09214834	PRJNA362212	doi.org/10.1038/s41467-019-09364-x
PaGeD_00977	GCA_003645585.1	SAMN09215109	PRJNA362212	doi.org/10.1038/s41467-019-09364-x
PaGeD_00978	GCA_003645605.1	SAMN09215301	PRJNA362212	doi.org/10.1038/s41467-019-09364-x
PaGeD_00979	GCA_003645615.1	SAMN09214905	PRJNA362212	doi.org/10.1038/s41467-019-09364-x
PaGeD_00980	GCA_003645645.1	SAMN09214977	PRJNA362212	doi.org/10.1038/s41467-019-09364-x
PaGeD_00981	GCA_003645655.1	SAMN09215296	PRJNA362212	doi.org/10.1038/s41467-019-09364-x
PaGeD_00982	GCA_003645685.1	SAMN09214819	PRJNA362212	doi.org/10.1038/s41467-019-09364-x
PaGeD_00983	GCA_003645695.1	SAMN09215293	PRJNA362212	doi.org/10.1038/s41467-019-09364-x
PaGeD_00984	GCA_003645725.1	SAMN09214897	PRJNA362212	doi.org/10.1038/s41467-019-09364-x
PaGeD_00985	GCA_003645735.1	SAMN09215022	PRJNA362212	doi.org/10.1038/s41467-019-09364-x
PaGeD_00986	GCA_003645745.1	SAMN09215260	PRJNA362212	doi.org/10.1038/s41467-019-09364-x
PaGeD_00987	GCA_003645785.1	SAMN09214894	PRJNA362212	doi.org/10.1038/s41467-019-09364-x
PaGeD_00988	GCA_003645805.1	SAMN09215074	PRJNA362212	doi.org/10.1038/s41467-019-09364-x
PaGeD_00989	GCA_003645825.1	SAMN09214890	PRJNA362212	doi.org/10.1038/s41467-019-09364-x
PaGeD_00990	GCA_003645835.1	SAMN09214954	PRJNA362212	doi.org/10.1038/s41467-019-09364-x
PaGeD_00991	GCA_003645845.1	SAMN09215252	PRJNA362212	doi.org/10.1038/s41467-019-09364-x
PaGeD_00992	GCA_003645885.1	SAMN09215250	PRJNA362212	doi.org/10.1038/s41467-019-09364-x
PaGeD_00993	GCA_003645905.1	SAMN09214811	PRJNA362212	doi.org/10.1038/s41467-019-09364-x
PaGeD_00994	GCA_003645915.1	SAMN09215246	PRJNA362212	doi.org/10.1038/s41467-019-09364-x
PaGeD_00995	GCA_003645925.1	SAMN09214810	PRJNA362212	doi.org/10.1038/s41467-019-09364-x
PaGeD_00996	GCA_003645965.1	SAMN09214952	PRJNA362212	doi.org/10.1038/s41467-019-09364-x
PaGeD_00997	GCA_003645975.1	SAMN09215242	PRJNA362212	doi.org/10.1038/s41467-019-09364-x
PaGeD_00998	GCA_003645985.1	SAMN09214806	PRJNA362212	doi.org/10.1038/s41467-019-09364-x
PaGeD_00999	GCA_003646025.1	SAMN09215241	PRJNA362212	doi.org/10.1038/s41467-019-09364-x
PaGeD_01000	GCA_003646045.1	SAMN09215139	PRJNA362212	doi.org/10.1038/s41467-019-09364-x
PaGeD_01001	GCA_003646055.1	SAMN09214869	PRJNA362212	doi.org/10.1038/s41467-019-09364-x
PaGeD_01002	GCA_003646065.1	SAMN09214777	PRJNA362212	doi.org/10.1038/s41467-019-09364-x
PaGeD_01003	GCA_003646105.1	SAMN09214920	PRJNA362212	doi.org/10.1038/s41467-019-09364-x
PaGeD_01004	GCA_003646115.1	SAMN09214818	PRJNA362212	doi.org/10.1038/s41467-019-09364-x
PaGeD_01005	GCA_003646135.1	SAMN09215292	PRJNA362212	doi.org/10.1038/s41467-019-09364-x
PaGeD_01006	GCA_003646155.1	SAMN09215167	PRJNA362212	doi.org/10.1038/s41467-019-09364-x
PaGeD_01007	GCA_003646175.1	SAMN09215166	PRJNA362212	doi.org/10.1038/s41467-019-09364-x
PaGeD_01008	GCA_003646195.1	SAMN09215164	PRJNA362212	doi.org/10.1038/s41467-019-09364-x
PaGeD_01009	GCA_003646205.1	SAMN09215290	PRJNA362212	doi.org/10.1038/s41467-019-09364-x
PaGeD_01010	GCA_003646245.1	SAMN09215161	PRJNA362212	doi.org/10.1038/s41467-019-09364-x
PaGeD_01011	GCA_003646255.1	SAMN09215159	PRJNA362212	doi.org/10.1038/s41467-019-09364-x
PaGeD_01012	GCA_003646285.1	SAMN09215115	PRJNA362212	doi.org/10.1038/s41467-019-09364-x
PaGeD_01013	GCA_003646295.1	SAMN09215114	PRJNA362212	doi.org/10.1038/s41467-019-09364-x
PaGeD_01014	GCA_003646305.1	SAMN09215158	PRJNA362212	doi.org/10.1038/s41467-019-09364-x
PaGeD_01015	GCA_003646345.1	SAMN09215157	PRJNA362212	doi.org/10.1038/s41467-019-09364-x
PaGeD_01016	GCA_003646355.1	SAMN09215156	PRJNA362212	doi.org/10.1038/s41467-019-09364-x
PaGeD_01017	GCA_003646365.1	SAMN09215112	PRJNA362212	doi.org/10.1038/s41467-019-09364-x
PaGeD_01018	GCA_003646405.1	SAMN09215154	PRJNA362212	doi.org/10.1038/s41467-019-09364-x
PaGeD_01019	GCA_003646415.1	SAMN09215153	PRJNA362212	doi.org/10.1038/s41467-019-09364-x
PaGeD_01020	GCA_003646445.1	SAMN09215111	PRJNA362212	doi.org/10.1038/s41467-019-09364-x
PaGeD_01021	GCA_003646455.1	SAMN09215110	PRJNA362212	doi.org/10.1038/s41467-019-09364-x
PaGeD_01022	GCA_003646505.1	SAMN09215107	PRJNA362212	doi.org/10.1038/s41467-019-09364-x
PaGeD_01023	GCA_003646525.1	SAMN09215288	PRJNA362212	doi.org/10.1038/s41467-019-09364-x
PaGeD_01024	GCA_003646535.1	SAMN09215286	PRJNA362212	doi.org/10.1038/s41467-019-09364-x
PaGeD_01025	GCA_003646545.1	SAMN09215285	PRJNA362212	doi.org/10.1038/s41467-019-09364-x
PaGeD_01026	GCA_003646585.1	SAMN09214974	PRJNA362212	doi.org/10.1038/s41467-019-09364-x
PaGeD_01027	GCA_003646595.1	SAMN09214900	PRJNA362212	doi.org/10.1038/s41467-019-09364-x
PaGeD_01028	GCA_003646625.1	SAMN09215283	PRJNA362212	doi.org/10.1038/s41467-019-09364-x
PaGeD_01029	GCA_003646645.1	SAMN09214817	PRJNA362212	doi.org/10.1038/s41467-019-09364-x
PaGeD_01030	GCA_003646655.1	SAMN09214816	PRJNA362212	doi.org/10.1038/s41467-019-09364-x
PaGeD_01031	GCA_003646665.1	SAMN09215023	PRJNA362212	doi.org/10.1038/s41467-019-09364-x
PaGeD_01032	GCA_003646705.1	SAMN09214899	PRJNA362212	doi.org/10.1038/s41467-019-09364-x
PaGeD_01033	GCA_003646715.1	SAMN09215281	PRJNA362212	doi.org/10.1038/s41467-019-09364-x
PaGeD_01034	GCA_003646745.1	SAMN09214898	PRJNA362212	doi.org/10.1038/s41467-019-09364-x
PaGeD_01035	GCA_003646755.1	SAMN09215280	PRJNA362212	doi.org/10.1038/s41467-019-09364-x
PaGeD_01036	GCA_003646785.1	SAMN09215279	PRJNA362212	doi.org/10.1038/s41467-019-09364-x
PaGeD_01037	GCA_003646795.1	SAMN09215079	PRJNA362212	doi.org/10.1038/s41467-019-09364-x
PaGeD_01038	GCA_003646815.1	SAMN09215278	PRJNA362212	doi.org/10.1038/s41467-019-09364-x
PaGeD_01039	GCA_003646845.1	SAMN09215078	PRJNA362212	doi.org/10.1038/s41467-019-09364-x
PaGeD_01040	GCA_003646865.1	SAMN09214972	PRJNA362212	doi.org/10.1038/s41467-019-09364-x
PaGeD_01041	GCA_003646875.1	SAMN09214971	PRJNA362212	doi.org/10.1038/s41467-019-09364-x
PaGeD_01042	GCA_003646895.1	SAMN09215077	PRJNA362212	doi.org/10.1038/s41467-019-09364-x
PaGeD_01043	GCA_003646925.1	SAMN09214842	PRJNA362212	doi.org/10.1038/s41467-019-09364-x
PaGeD_01044	GCA_003646935.1	SAMN09214970	PRJNA362212	doi.org/10.1038/s41467-019-09364-x
PaGeD_01045	GCA_003646955.1	SAMN09214969	PRJNA362212	doi.org/10.1038/s41467-019-09364-x
PaGeD_01046	GCA_003646975.1	SAMN09214968	PRJNA362212	doi.org/10.1038/s41467-019-09364-x
PaGeD_01047	GCA_003646995.1	SAMN09215277	PRJNA362212	doi.org/10.1038/s41467-019-09364-x
PaGeD_01048	GCA_003647025.1	SAMN09215106	PRJNA362212	doi.org/10.1038/s41467-019-09364-x
PaGeD_01049	GCA_003647035.1	SAMN09214832	PRJNA362212	doi.org/10.1038/s41467-019-09364-x
PaGeD_01050	GCA_003647065.1	SAMN09215105	PRJNA362212	doi.org/10.1038/s41467-019-09364-x
PaGeD_01051	GCA_003647075.1	SAMN09215104	PRJNA362212	doi.org/10.1038/s41467-019-09364-x
PaGeD_01052	GCA_003647095.1	SAMN09215276	PRJNA362212	doi.org/10.1038/s41467-019-09364-x
PaGeD_01053	GCA_003647125.1	SAMN09214815	PRJNA362212	doi.org/10.1038/s41467-019-09364-x
PaGeD_01054	GCA_003647135.1	SAMN09215150	PRJNA362212	doi.org/10.1038/s41467-019-09364-x
PaGeD_01055	GCA_003647165.1	SAMN09215275	PRJNA362212	doi.org/10.1038/s41467-019-09364-x
PaGeD_01056	GCA_003647175.1	SAMN09215274	PRJNA362212	doi.org/10.1038/s41467-019-09364-x
PaGeD_01057	GCA_003647205.1	SAMN09215273	PRJNA362212	doi.org/10.1038/s41467-019-09364-x
PaGeD_01058	GCA_003647225.1	SAMN09215149	PRJNA362212	doi.org/10.1038/s41467-019-09364-x
PaGeD_01059	GCA_003647235.1	SAMN09214814	PRJNA362212	doi.org/10.1038/s41467-019-09364-x
PaGeD_01060	GCA_003647245.1	SAMN09215272	PRJNA362212	doi.org/10.1038/s41467-019-09364-x
PaGeD_01061	GCA_003647275.1	SAMN09214967	PRJNA362212	doi.org/10.1038/s41467-019-09364-x
PaGeD_01062	GCA_003647305.1	SAMN09215148	PRJNA362212	doi.org/10.1038/s41467-019-09364-x
PaGeD_01063	GCA_003647315.1	SAMN09214813	PRJNA362212	doi.org/10.1038/s41467-019-09364-x
PaGeD_01064	GCA_003647325.1	SAMN09215271	PRJNA362212	doi.org/10.1038/s41467-019-09364-x
PaGeD_01065	GCA_003647365.1	SAMN09215103	PRJNA362212	doi.org/10.1038/s41467-019-09364-x
PaGeD_01066	GCA_003647375.1	SAMN09215147	PRJNA362212	doi.org/10.1038/s41467-019-09364-x
PaGeD_01067	GCA_003647385.1	SAMN09215076	PRJNA362212	doi.org/10.1038/s41467-019-09364-x
PaGeD_01068	GCA_003647425.1	SAMN09215146	PRJNA362212	doi.org/10.1038/s41467-019-09364-x
PaGeD_01069	GCA_003647435.1	SAMN09214966	PRJNA362212	doi.org/10.1038/s41467-019-09364-x
PaGeD_01070	GCA_003647445.1	SAMN09215102	PRJNA362212	doi.org/10.1038/s41467-019-09364-x
PaGeD_01071	GCA_003647485.1	SAMN09215270	PRJNA362212	doi.org/10.1038/s41467-019-09364-x
PaGeD_01072	GCA_003647505.1	SAMN09215269	PRJNA362212	doi.org/10.1038/s41467-019-09364-x
PaGeD_01073	GCA_003647525.1	SAMN09215101	PRJNA362212	doi.org/10.1038/s41467-019-09364-x
PaGeD_01074	GCA_003647535.1	SAMN09215268	PRJNA362212	doi.org/10.1038/s41467-019-09364-x
PaGeD_01075	GCA_003647555.1	SAMN09215145	PRJNA362212	doi.org/10.1038/s41467-019-09364-x
PaGeD_01076	GCA_003647575.1	SAMN09214843	PRJNA362212	doi.org/10.1038/s41467-019-09364-x
PaGeD_01077	GCA_003647605.1	SAMN09215082	PRJNA362212	doi.org/10.1038/s41467-019-09364-x
PaGeD_01078	GCA_003647645.1	SAMN09214950	PRJNA362212	doi.org/10.1038/s41467-019-09364-x
PaGeD_01079	GCA_003647665.1	SAMN09214958	PRJNA362212	doi.org/10.1038/s41467-019-09364-x
PaGeD_01080	GCA_003647675.1	SAMN09215098	PRJNA362212	doi.org/10.1038/s41467-019-09364-x
PaGeD_01081	GCA_003647695.1	SAMN09215210	PRJNA362212	doi.org/10.1038/s41467-019-09364-x
PaGeD_01082	GCA_003647715.1	SAMN09215044	PRJNA362212	doi.org/10.1038/s41467-019-09364-x
PaGeD_01083	GCA_003647745.1	SAMN09214783	PRJNA362212	doi.org/10.1038/s41467-019-09364-x
PaGeD_01084	GCA_003647755.1	SAMN09215209	PRJNA362212	doi.org/10.1038/s41467-019-09364-x
PaGeD_01085	GCA_003647765.1	SAMN09215208	PRJNA362212	doi.org/10.1038/s41467-019-09364-x
PaGeD_01086	GCA_003647805.1	SAMN09214782	PRJNA362212	doi.org/10.1038/s41467-019-09364-x
PaGeD_01087	GCA_003647815.1	SAMN09215207	PRJNA362212	doi.org/10.1038/s41467-019-09364-x
PaGeD_01088	GCA_003647825.1	SAMN09215206	PRJNA362212	doi.org/10.1038/s41467-019-09364-x
PaGeD_01089	GCA_003647865.1	SAMN09215205	PRJNA362212	doi.org/10.1038/s41467-019-09364-x
PaGeD_01090	GCA_003647875.1	SAMN09214780	PRJNA362212	doi.org/10.1038/s41467-019-09364-x
PaGeD_01091	GCA_003647885.1	SAMN09214830	PRJNA362212	doi.org/10.1038/s41467-019-09364-x
PaGeD_01092	GCA_003647925.1	SAMN09214841	PRJNA362212	doi.org/10.1038/s41467-019-09364-x
PaGeD_01093	GCA_003647945.1	SAMN09214925	PRJNA362212	doi.org/10.1038/s41467-019-09364-x
PaGeD_01094	GCA_003647955.1	SAMN09214924	PRJNA362212	doi.org/10.1038/s41467-019-09364-x
PaGeD_01095	GCA_003647975.1	SAMN09214840	PRJNA362212	doi.org/10.1038/s41467-019-09364-x
PaGeD_01096	GCA_003648005.1	SAMN09214779	PRJNA362212	doi.org/10.1038/s41467-019-09364-x
PaGeD_01097	GCA_003648015.1	SAMN09214874	PRJNA362212	doi.org/10.1038/s41467-019-09364-x
PaGeD_01098	GCA_003648025.1	SAMN09214778	PRJNA362212	doi.org/10.1038/s41467-019-09364-x
PaGeD_01099	GCA_003648065.1	SAMN09214781	PRJNA362212	doi.org/10.1038/s41467-019-09364-x
PaGeD_01100	GCA_003648075.1	SAMN09215043	PRJNA362212	doi.org/10.1038/s41467-019-09364-x
PaGeD_01101	GCA_003648085.1	SAMN09214872	PRJNA362212	doi.org/10.1038/s41467-019-09364-x
PaGeD_01102	GCA_003648125.1	SAMN09215203	PRJNA362212	doi.org/10.1038/s41467-019-09364-x
PaGeD_01103	GCA_003648135.1	SAMN09215097	PRJNA362212	doi.org/10.1038/s41467-019-09364-x
PaGeD_01104	GCA_003648145.1	SAMN09215096	PRJNA362212	doi.org/10.1038/s41467-019-09364-x
PaGeD_01105	GCA_003648185.1	SAMN09215202	PRJNA362212	doi.org/10.1038/s41467-019-09364-x
PaGeD_01106	GCA_003648195.1	SAMN09215201	PRJNA362212	doi.org/10.1038/s41467-019-09364-x
PaGeD_01107	GCA_003648225.1	SAMN09215200	PRJNA362212	doi.org/10.1038/s41467-019-09364-x
PaGeD_01108	GCA_003648235.1	SAMN09215042	PRJNA362212	doi.org/10.1038/s41467-019-09364-x
PaGeD_01109	GCA_003648245.1	SAMN09214871	PRJNA362212	doi.org/10.1038/s41467-019-09364-x
PaGeD_01110	GCA_003648285.1	SAMN09215093	PRJNA362212	doi.org/10.1038/s41467-019-09364-x
PaGeD_01111	GCA_003648295.1	SAMN09215138	PRJNA362212	doi.org/10.1038/s41467-019-09364-x
PaGeD_01112	GCA_003648305.1	SAMN09215137	PRJNA362212	doi.org/10.1038/s41467-019-09364-x
PaGeD_01113	GCA_003648345.1	SAMN09214829	PRJNA362212	doi.org/10.1038/s41467-019-09364-x
PaGeD_01114	GCA_003648355.1	SAMN09215136	PRJNA362212	doi.org/10.1038/s41467-019-09364-x
PaGeD_01115	GCA_003648385.1	SAMN09215135	PRJNA362212	doi.org/10.1038/s41467-019-09364-x
PaGeD_01116	GCA_003648395.1	SAMN09215190	PRJNA362212	doi.org/10.1038/s41467-019-09364-x
PaGeD_01117	GCA_003648415.1	SAMN09215033	PRJNA362212	doi.org/10.1038/s41467-019-09364-x
PaGeD_01118	GCA_003648435.1	SAMN09215134	PRJNA362212	doi.org/10.1038/s41467-019-09364-x
PaGeD_01119	GCA_003648455.1	SAMN09215188	PRJNA362212	doi.org/10.1038/s41467-019-09364-x
PaGeD_01120	GCA_003648485.1	SAMN09215133	PRJNA362212	doi.org/10.1038/s41467-019-09364-x
PaGeD_01121	GCA_003648505.1	SAMN09215132	PRJNA362212	doi.org/10.1038/s41467-019-09364-x
PaGeD_01122	GCA_003648515.1	SAMN09215092	PRJNA362212	doi.org/10.1038/s41467-019-09364-x
PaGeD_01123	GCA_003648535.1	SAMN09215187	PRJNA362212	doi.org/10.1038/s41467-019-09364-x
PaGeD_01124	GCA_003648565.1	SAMN09215131	PRJNA362212	doi.org/10.1038/s41467-019-09364-x
PaGeD_01125	GCA_003648575.1	SAMN09215090	PRJNA362212	doi.org/10.1038/s41467-019-09364-x
PaGeD_01126	GCA_003648585.1	SAMN09215091	PRJNA362212	doi.org/10.1038/s41467-019-09364-x
PaGeD_01127	GCA_003648625.1	SAMN09215130	PRJNA362212	doi.org/10.1038/s41467-019-09364-x
PaGeD_01128	GCA_003648635.1	SAMN09215129	PRJNA362212	doi.org/10.1038/s41467-019-09364-x
PaGeD_01129	GCA_003648655.1	SAMN09214769	PRJNA362212	doi.org/10.1038/s41467-019-09364-x
PaGeD_01130	GCA_003648675.1	SAMN09214768	PRJNA362212	doi.org/10.1038/s41467-019-09364-x
PaGeD_01131	GCA_003648695.1	SAMN09215032	PRJNA362212	doi.org/10.1038/s41467-019-09364-x
PaGeD_01132	GCA_003648725.1	SAMN09214859	PRJNA362212	doi.org/10.1038/s41467-019-09364-x
PaGeD_01133	GCA_003648735.1	SAMN09215185	PRJNA362212	doi.org/10.1038/s41467-019-09364-x
PaGeD_01134	GCA_003648765.1	SAMN09214912	PRJNA362212	doi.org/10.1038/s41467-019-09364-x
PaGeD_01135	GCA_003648785.1	SAMN09214766	PRJNA362212	doi.org/10.1038/s41467-019-09364-x
PaGeD_01136	GCA_003648795.1	SAMN09214845	PRJNA362212	doi.org/10.1038/s41467-019-09364-x
PaGeD_01137	GCA_003648815.1	SAMN09214911	PRJNA362212	doi.org/10.1038/s41467-019-09364-x
PaGeD_01138	GCA_003648845.1	SAMN09214858	PRJNA362212	doi.org/10.1038/s41467-019-09364-x
PaGeD_01139	GCA_003648865.1	SAMN09215182	PRJNA362212	doi.org/10.1038/s41467-019-09364-x
PaGeD_01140	GCA_003648875.1	SAMN09214827	PRJNA362212	doi.org/10.1038/s41467-019-09364-x
PaGeD_01141	GCA_003648905.1	SAMN09215089	PRJNA362212	doi.org/10.1038/s41467-019-09364-x
PaGeD_01142	GCA_003648915.1	SAMN09215128	PRJNA362212	doi.org/10.1038/s41467-019-09364-x
PaGeD_01143	GCA_003648925.1	SAMN09214762	PRJNA362212	doi.org/10.1038/s41467-019-09364-x
PaGeD_01144	GCA_003648965.1	SAMN09214855	PRJNA362212	doi.org/10.1038/s41467-019-09364-x
PaGeD_01145	GCA_003648975.1	SAMN09214844	PRJNA362212	doi.org/10.1038/s41467-019-09364-x
PaGeD_01146	GCA_003648985.1	SAMN09214904	PRJNA362212	doi.org/10.1038/s41467-019-09364-x
PaGeD_01147	GCA_003649025.1	SAMN09215030	PRJNA362212	doi.org/10.1038/s41467-019-09364-x
PaGeD_01148	GCA_003649035.1	SAMN09215308	PRJNA362212	doi.org/10.1038/s41467-019-09364-x
PaGeD_01149	GCA_003649055.1	SAMN09215307	PRJNA362212	doi.org/10.1038/s41467-019-09364-x
PaGeD_01150	GCA_003649085.1	SAMN09214983	PRJNA362212	doi.org/10.1038/s41467-019-09364-x
PaGeD_01151	GCA_003649095.1	SAMN09215029	PRJNA362212	doi.org/10.1038/s41467-019-09364-x
PaGeD_01152	GCA_003649105.1	SAMN09215028	PRJNA362212	doi.org/10.1038/s41467-019-09364-x
PaGeD_01153	GCA_003649145.1	SAMN09215027	PRJNA362212	doi.org/10.1038/s41467-019-09364-x
PaGeD_01154	GCA_003649155.1	SAMN09215088	PRJNA362212	doi.org/10.1038/s41467-019-09364-x
PaGeD_01155	GCA_003649185.1	SAMN09214981	PRJNA362212	doi.org/10.1038/s41467-019-09364-x
PaGeD_01156	GCA_003649205.1	SAMN09214938	PRJNA362212	doi.org/10.1038/s41467-019-09364-x
PaGeD_01157	GCA_003649225.1	SAMN09215010	PRJNA362212	doi.org/10.1038/s41467-019-09364-x
PaGeD_01158	GCA_003649235.1	SAMN09214937	PRJNA362212	doi.org/10.1038/s41467-019-09364-x
PaGeD_01159	GCA_003649255.1	SAMN09215052	PRJNA362212	doi.org/10.1038/s41467-019-09364-x
PaGeD_01160	GCA_003649285.1	SAMN09215051	PRJNA362212	doi.org/10.1038/s41467-019-09364-x
PaGeD_01161	GCA_003649295.1	SAMN09215009	PRJNA362212	doi.org/10.1038/s41467-019-09364-x
PaGeD_01162	GCA_003649305.1	SAMN09215008	PRJNA362212	doi.org/10.1038/s41467-019-09364-x
PaGeD_01163	GCA_003649345.1	SAMN09215050	PRJNA362212	doi.org/10.1038/s41467-019-09364-x
PaGeD_01164	GCA_003649355.1	SAMN09214785	PRJNA362212	doi.org/10.1038/s41467-019-09364-x
PaGeD_01165	GCA_003649375.1	SAMN09214935	PRJNA362212	doi.org/10.1038/s41467-019-09364-x
PaGeD_01166	GCA_003649405.1	SAMN09215007	PRJNA362212	doi.org/10.1038/s41467-019-09364-x
PaGeD_01167	GCA_003649425.1	SAMN09215006	PRJNA362212	doi.org/10.1038/s41467-019-09364-x
PaGeD_01168	GCA_003649445.1	SAMN09214934	PRJNA362212	doi.org/10.1038/s41467-019-09364-x
PaGeD_01169	GCA_003649455.1	SAMN09215004	PRJNA362212	doi.org/10.1038/s41467-019-09364-x
PaGeD_01170	GCA_003649485.1	SAMN09215214	PRJNA362212	doi.org/10.1038/s41467-019-09364-x
PaGeD_01171	GCA_003649495.1	SAMN09214877	PRJNA362212	doi.org/10.1038/s41467-019-09364-x
PaGeD_01172	GCA_003649515.1	SAMN09215002	PRJNA362212	doi.org/10.1038/s41467-019-09364-x
PaGeD_01173	GCA_003649545.1	SAMN09215213	PRJNA362212	doi.org/10.1038/s41467-019-09364-x
PaGeD_01174	GCA_003649555.1	SAMN09215001	PRJNA362212	doi.org/10.1038/s41467-019-09364-x
PaGeD_01175	GCA_003649565.1	SAMN09214933	PRJNA362212	doi.org/10.1038/s41467-019-09364-x
PaGeD_01176	GCA_003649605.1	SAMN09215048	PRJNA362212	doi.org/10.1038/s41467-019-09364-x
PaGeD_01177	GCA_003649615.1	SAMN09215046	PRJNA362212	doi.org/10.1038/s41467-019-09364-x
PaGeD_01178	GCA_003649625.1	SAMN09215000	PRJNA362212	doi.org/10.1038/s41467-019-09364-x
PaGeD_01179	GCA_003649665.1	SAMN09214932	PRJNA362212	doi.org/10.1038/s41467-019-09364-x
PaGeD_01180	GCA_003649685.1	SAMN09214876	PRJNA362212	doi.org/10.1038/s41467-019-09364-x
PaGeD_01181	GCA_003649695.1	SAMN09215237	PRJNA362212	doi.org/10.1038/s41467-019-09364-x
PaGeD_01182	GCA_003649715.1	SAMN09215236	PRJNA362212	doi.org/10.1038/s41467-019-09364-x
PaGeD_01183	GCA_003649745.1	SAMN09214850	PRJNA362212	doi.org/10.1038/s41467-019-09364-x
PaGeD_01184	GCA_003649765.1	SAMN09214803	PRJNA362212	doi.org/10.1038/s41467-019-09364-x
PaGeD_01185	GCA_003649775.1	SAMN09214804	PRJNA362212	doi.org/10.1038/s41467-019-09364-x
PaGeD_01186	GCA_003649785.1	SAMN09215068	PRJNA362212	doi.org/10.1038/s41467-019-09364-x
PaGeD_01187	GCA_003649825.1	SAMN09214802	PRJNA362212	doi.org/10.1038/s41467-019-09364-x
PaGeD_01188	GCA_003649835.1	SAMN09215014	PRJNA362212	doi.org/10.1038/s41467-019-09364-x
PaGeD_01189	GCA_003649845.1	SAMN09214885	PRJNA362212	doi.org/10.1038/s41467-019-09364-x
PaGeD_01190	GCA_003649885.1	SAMN09214946	PRJNA362212	doi.org/10.1038/s41467-019-09364-x
PaGeD_01191	GCA_003649895.1	SAMN09214801	PRJNA362212	doi.org/10.1038/s41467-019-09364-x
PaGeD_01192	GCA_003649915.1	SAMN09215013	PRJNA362212	doi.org/10.1038/s41467-019-09364-x
PaGeD_01193	GCA_003649945.1	SAMN09214800	PRJNA362212	doi.org/10.1038/s41467-019-09364-x
PaGeD_01194	GCA_003649955.1	SAMN09215066	PRJNA362212	doi.org/10.1038/s41467-019-09364-x
PaGeD_01195	GCA_003649965.1	SAMN09214799	PRJNA362212	doi.org/10.1038/s41467-019-09364-x
PaGeD_01196	GCA_003650005.1	SAMN09215232	PRJNA362212	doi.org/10.1038/s41467-019-09364-x
PaGeD_01197	GCA_003650025.1	SAMN09215229	PRJNA362212	doi.org/10.1038/s41467-019-09364-x
PaGeD_01198	GCA_003650035.1	SAMN09215144	PRJNA362212	doi.org/10.1038/s41467-019-09364-x
PaGeD_01199	GCA_003650065.1	SAMN09214797	PRJNA362212	doi.org/10.1038/s41467-019-09364-x
PaGeD_01200	GCA_003650075.1	SAMN09215061	PRJNA362212	doi.org/10.1038/s41467-019-09364-x
PaGeD_01201	GCA_003650085.1	SAMN09215152	PRJNA362212	doi.org/10.1038/s41467-019-09364-x
PaGeD_01202	GCA_003650125.1	SAMN09215108	PRJNA362212	doi.org/10.1038/s41467-019-09364-x
PaGeD_01203	GCA_003650175.1	SAMN09215204	PRJNA362212	doi.org/10.1038/s41467-019-09364-x
PaGeD_01204	GCA_003650185.1	SAMN09214873	PRJNA362212	doi.org/10.1038/s41467-019-09364-x
PaGeD_01205	GCA_003650225.1	SAMN09214923	PRJNA362212	doi.org/10.1038/s41467-019-09364-x
PaGeD_01206	GCA_003650235.1	SAMN09215245	PRJNA362212	doi.org/10.1038/s41467-019-09364-x
PaGeD_01207	GCA_003650255.1	SAMN09214870	PRJNA362212	doi.org/10.1038/s41467-019-09364-x
PaGeD_01208	GCA_003650285.1	SAMN09215095	PRJNA362212	doi.org/10.1038/s41467-019-09364-x
PaGeD_01209	GCA_003650305.1	SAMN09214828	PRJNA362212	doi.org/10.1038/s41467-019-09364-x
PaGeD_01210	GCA_003650315.1	SAMN09215034	PRJNA362212	doi.org/10.1038/s41467-019-09364-x
PaGeD_01211	GCA_003650335.1	SAMN09215192	PRJNA362212	doi.org/10.1038/s41467-019-09364-x
PaGeD_01212	GCA_003650365.1	SAMN09215191	PRJNA362212	doi.org/10.1038/s41467-019-09364-x
PaGeD_01213	GCA_003650385.1	SAMN09214770	PRJNA362212	doi.org/10.1038/s41467-019-09364-x
PaGeD_01214	GCA_003650395.1	SAMN09215189	PRJNA362212	doi.org/10.1038/s41467-019-09364-x
PaGeD_01215	GCA_003650425.1	SAMN09215186	PRJNA362212	doi.org/10.1038/s41467-019-09364-x
PaGeD_01216	GCA_003650445.1	SAMN09215176	PRJNA362212	doi.org/10.1038/s41467-019-09364-x
PaGeD_01217	GCA_003650455.1	SAMN09215127	PRJNA362212	doi.org/10.1038/s41467-019-09364-x
PaGeD_01218	GCA_003650485.1	SAMN09215175	PRJNA362212	doi.org/10.1038/s41467-019-09364-x
PaGeD_01219	GCA_003650495.1	SAMN09215174	PRJNA362212	doi.org/10.1038/s41467-019-09364-x
PaGeD_01220	GCA_003650505.1	SAMN09214906	PRJNA362212	doi.org/10.1038/s41467-019-09364-x
PaGeD_01221	GCA_003650545.1	SAMN09214984	PRJNA362212	doi.org/10.1038/s41467-019-09364-x
PaGeD_01222	GCA_003650565.1	SAMN09214761	PRJNA362212	doi.org/10.1038/s41467-019-09364-x
PaGeD_01223	GCA_003650575.1	SAMN09214825	PRJNA362212	doi.org/10.1038/s41467-019-09364-x
PaGeD_01224	GCA_003650585.1	SAMN09214903	PRJNA362212	doi.org/10.1038/s41467-019-09364-x
PaGeD_01225	GCA_003650625.1	SAMN09214982	PRJNA362212	doi.org/10.1038/s41467-019-09364-x
PaGeD_01226	GCA_003650635.1	SAMN09215216	PRJNA362212	doi.org/10.1038/s41467-019-09364-x
PaGeD_01227	GCA_003650665.1	SAMN09214787	PRJNA362212	doi.org/10.1038/s41467-019-09364-x
PaGeD_01228	GCA_003650675.1	SAMN09214936	PRJNA362212	doi.org/10.1038/s41467-019-09364-x
PaGeD_01229	GCA_003650705.1	SAMN09215054	PRJNA362212	doi.org/10.1038/s41467-019-09364-x
PaGeD_01230	GCA_003650715.1	SAMN09214786	PRJNA362212	doi.org/10.1038/s41467-019-09364-x
PaGeD_01231	GCA_003650735.1	SAMN09215053	PRJNA362212	doi.org/10.1038/s41467-019-09364-x
PaGeD_01232	GCA_003650755.1	SAMN09215215	PRJNA362212	doi.org/10.1038/s41467-019-09364-x
PaGeD_01233	GCA_003650785.1	SAMN09215005	PRJNA362212	doi.org/10.1038/s41467-019-09364-x
PaGeD_01234	GCA_003650795.1	SAMN09215003	PRJNA362212	doi.org/10.1038/s41467-019-09364-x
PaGeD_01235	GCA_003650815.1	SAMN09215049	PRJNA362212	doi.org/10.1038/s41467-019-09364-x
PaGeD_01236	GCA_003650845.1	SAMN09215047	PRJNA362212	doi.org/10.1038/s41467-019-09364-x
PaGeD_01237	GCA_003650865.1	SAMN09214998	PRJNA362212	doi.org/10.1038/s41467-019-09364-x
PaGeD_01238	GCA_003650875.1	SAMN09214999	PRJNA362212	doi.org/10.1038/s41467-019-09364-x
PaGeD_01239	GCA_003650905.1	SAMN09214875	PRJNA362212	doi.org/10.1038/s41467-019-09364-x
PaGeD_01240	GCA_003650925.1	SAMN09214931	PRJNA362212	doi.org/10.1038/s41467-019-09364-x
PaGeD_01241	GCA_003650935.1	SAMN09215238	PRJNA362212	doi.org/10.1038/s41467-019-09364-x
PaGeD_01242	GCA_003650965.1	SAMN09214849	PRJNA362212	doi.org/10.1038/s41467-019-09364-x
PaGeD_01243	GCA_003650975.1	SAMN09215235	PRJNA362212	doi.org/10.1038/s41467-019-09364-x
PaGeD_01244	GCA_003650985.1	SAMN09214947	PRJNA362212	doi.org/10.1038/s41467-019-09364-x
PaGeD_01245	GCA_003651025.1	SAMN09214884	PRJNA362212	doi.org/10.1038/s41467-019-09364-x
PaGeD_01246	GCA_003651035.1	SAMN09215067	PRJNA362212	doi.org/10.1038/s41467-019-09364-x
PaGeD_01247	GCA_003651045.1	SAMN09215234	PRJNA362212	doi.org/10.1038/s41467-019-09364-x
PaGeD_01248	GCA_003651085.1	SAMN09215065	PRJNA362212	doi.org/10.1038/s41467-019-09364-x
PaGeD_01249	GCA_003651095.1	SAMN09214798	PRJNA362212	doi.org/10.1038/s41467-019-09364-x
PaGeD_01250	GCA_003651105.1	SAMN09215064	PRJNA362212	doi.org/10.1038/s41467-019-09364-x
PaGeD_01251	GCA_003651145.1	SAMN09215233	PRJNA362212	doi.org/10.1038/s41467-019-09364-x
PaGeD_01252	GCA_003651155.1	SAMN09215231	PRJNA362212	doi.org/10.1038/s41467-019-09364-x
PaGeD_01253	GCA_003660485.1	SAMN09215142	PRJNA362212	doi.org/10.1038/s41467-019-09364-x
PaGeD_01254	GCA_003660495.1	SAMN09214796	PRJNA362212	doi.org/10.1038/s41467-019-09364-x
PaGeD_01255	GCA_003660515.1	SAMN09215226	PRJNA362212	doi.org/10.1038/s41467-019-09364-x
PaGeD_01256	GCA_003660545.1	SAMN09214795	PRJNA362212	doi.org/10.1038/s41467-019-09364-x
PaGeD_01257	GCA_003660555.1	SAMN09215225	PRJNA362212	doi.org/10.1038/s41467-019-09364-x
PaGeD_01258	GCA_003660565.1	SAMN09214794	PRJNA362212	doi.org/10.1038/s41467-019-09364-x
PaGeD_01259	GCA_003660605.1	SAMN09214943	PRJNA362212	doi.org/10.1038/s41467-019-09364-x
PaGeD_01260	GCA_003660625.1	SAMN09215224	PRJNA362212	doi.org/10.1038/s41467-019-09364-x
PaGeD_01261	GCA_003660635.1	SAMN09215300	PRJNA362212	doi.org/10.1038/s41467-019-09364-x
PaGeD_01262	GCA_003660665.1	SAMN09214979	PRJNA362212	doi.org/10.1038/s41467-019-09364-x
PaGeD_01263	GCA_003660685.1	SAMN09214978	PRJNA362212	doi.org/10.1038/s41467-019-09364-x
PaGeD_01264	GCA_003660695.1	SAMN09215084	PRJNA362212	doi.org/10.1038/s41467-019-09364-x
PaGeD_01265	GCA_003660725.1	SAMN09215026	PRJNA362212	doi.org/10.1038/s41467-019-09364-x
PaGeD_01266	GCA_003660745.1	SAMN09215025	PRJNA362212	doi.org/10.1038/s41467-019-09364-x
PaGeD_01267	GCA_003660755.1	SAMN09214820	PRJNA362212	doi.org/10.1038/s41467-019-09364-x
PaGeD_01268	GCA_003660785.1	SAMN09215024	PRJNA362212	doi.org/10.1038/s41467-019-09364-x
PaGeD_01269	GCA_003660805.1	SAMN09215299	PRJNA362212	doi.org/10.1038/s41467-019-09364-x
PaGeD_01270	GCA_003660825.1	SAMN09215263	PRJNA362212	doi.org/10.1038/s41467-019-09364-x
PaGeD_01271	GCA_003660845.1	SAMN09214963	PRJNA362212	doi.org/10.1038/s41467-019-09364-x
PaGeD_01272	GCA_003660865.1	SAMN09215257	PRJNA362212	doi.org/10.1038/s41467-019-09364-x
PaGeD_01273	GCA_003660885.1	SAMN09215020	PRJNA362212	doi.org/10.1038/s41467-019-09364-x
PaGeD_01274	GCA_003660905.1	SAMN09215256	PRJNA362212	doi.org/10.1038/s41467-019-09364-x
PaGeD_01275	GCA_003660925.1	SAMN09214892	PRJNA362212	doi.org/10.1038/s41467-019-09364-x
PaGeD_01276	GCA_003660945.1	SAMN09215255	PRJNA362212	doi.org/10.1038/s41467-019-09364-x
PaGeD_01277	GCA_003660965.1	SAMN09214957	PRJNA362212	doi.org/10.1038/s41467-019-09364-x
PaGeD_01278	GCA_003660975.1	SAMN09214891	PRJNA362212	doi.org/10.1038/s41467-019-09364-x
PaGeD_01279	GCA_003661005.1	SAMN09214791	PRJNA362212	doi.org/10.1038/s41467-019-09364-x
PaGeD_01280	GCA_003661015.1	SAMN09215221	PRJNA362212	doi.org/10.1038/s41467-019-09364-x
PaGeD_01281	GCA_003661045.1	SAMN09214941	PRJNA362212	doi.org/10.1038/s41467-019-09364-x
PaGeD_01282	GCA_003661065.1	SAMN09214790	PRJNA362212	doi.org/10.1038/s41467-019-09364-x
PaGeD_01283	GCA_003661075.1	SAMN09215220	PRJNA362212	doi.org/10.1038/s41467-019-09364-x
PaGeD_01284	GCA_003661105.1	SAMN09215219	PRJNA362212	doi.org/10.1038/s41467-019-09364-x
PaGeD_01285	GCA_003661125.1	SAMN09214940	PRJNA362212	doi.org/10.1038/s41467-019-09364-x
PaGeD_01286	GCA_003661135.1	SAMN09214789	PRJNA362212	doi.org/10.1038/s41467-019-09364-x
PaGeD_01287	GCA_003661165.1	SAMN09215141	PRJNA362212	doi.org/10.1038/s41467-019-09364-x
PaGeD_01288	GCA_003661185.1	SAMN09215057	PRJNA362212	doi.org/10.1038/s41467-019-09364-x
PaGeD_01289	GCA_003661195.1	SAMN09215218	PRJNA362212	doi.org/10.1038/s41467-019-09364-x
PaGeD_01290	GCA_003661225.1	SAMN09215244	PRJNA362212	doi.org/10.1038/s41467-019-09364-x
PaGeD_01291	GCA_003661245.1	SAMN09214951	PRJNA362212	doi.org/10.1038/s41467-019-09364-x
PaGeD_01292	GCA_003661265.1	SAMN09215018	PRJNA362212	doi.org/10.1038/s41467-019-09364-x
PaGeD_01293	GCA_003661285.1	SAMN09214809	PRJNA362212	doi.org/10.1038/s41467-019-09364-x
PaGeD_01294	GCA_003661305.1	SAMN09214808	PRJNA362212	doi.org/10.1038/s41467-019-09364-x
PaGeD_01295	GCA_003661315.1	SAMN09215071	PRJNA362212	doi.org/10.1038/s41467-019-09364-x
PaGeD_01296	GCA_003661345.1	SAMN09215017	PRJNA362212	doi.org/10.1038/s41467-019-09364-x
PaGeD_01297	GCA_003661365.1	SAMN09214886	PRJNA362212	doi.org/10.1038/s41467-019-09364-x
PaGeD_01298	GCA_003661385.1	SAMN09215070	PRJNA362212	doi.org/10.1038/s41467-019-09364-x
PaGeD_01299	GCA_003661405.1	SAMN09214788	PRJNA362212	doi.org/10.1038/s41467-019-09364-x
PaGeD_01300	GCA_003661425.1	SAMN09214880	PRJNA362212	doi.org/10.1038/s41467-019-09364-x
PaGeD_01301	GCA_003661445.1	SAMN09215016	PRJNA362212	doi.org/10.1038/s41467-019-09364-x
PaGeD_01302	GCA_003661465.1	SAMN09215217	PRJNA362212	doi.org/10.1038/s41467-019-09364-x
PaGeD_01303	GCA_003661485.1	SAMN09214948	PRJNA362212	doi.org/10.1038/s41467-019-09364-x
PaGeD_01304	GCA_003661505.1	SAMN09215015	PRJNA362212	doi.org/10.1038/s41467-019-09364-x
PaGeD_01305	GCA_003661525.1	SAMN09215239	PRJNA362212	doi.org/10.1038/s41467-019-09364-x
PaGeD_01306	GCA_003661545.1	SAMN09214767	PRJNA362212	doi.org/10.1038/s41467-019-09364-x
PaGeD_01307	GCA_003661565.1	SAMN09215031	PRJNA362212	doi.org/10.1038/s41467-019-09364-x
PaGeD_01308	GCA_003661585.1	SAMN09215184	PRJNA362212	doi.org/10.1038/s41467-019-09364-x
PaGeD_01309	GCA_003661605.1	SAMN09214986	PRJNA362212	doi.org/10.1038/s41467-019-09364-x
PaGeD_01310	GCA_003661625.1	SAMN09215183	PRJNA362212	doi.org/10.1038/s41467-019-09364-x
PaGeD_01311	GCA_003661645.1	SAMN09214793	PRJNA362212	doi.org/10.1038/s41467-019-09364-x
PaGeD_01312	GCA_003661665.1	SAMN09214847	PRJNA362212	doi.org/10.1038/s41467-019-09364-x
PaGeD_01313	GCA_003661685.1	SAMN09215011	PRJNA362212	doi.org/10.1038/s41467-019-09364-x
PaGeD_01314	GCA_003661705.1	SAMN09215045	PRJNA362212	doi.org/10.1038/s41467-019-09364-x
PaGeD_01315	GCA_003661715.1	SAMN09214784	PRJNA362212	doi.org/10.1038/s41467-019-09364-x
PaGeD_01316	GCA_003661745.1	SAMN09214930	PRJNA362212	doi.org/10.1038/s41467-019-09364-x
PaGeD_01317	GCA_003661765.1	SAMN09215212	PRJNA362212	doi.org/10.1038/s41467-019-09364-x
PaGeD_01318	GCA_003661775.1	SAMN09214929	PRJNA362212	doi.org/10.1038/s41467-019-09364-x
PaGeD_01319	GCA_003661805.1	SAMN09214928	PRJNA362212	doi.org/10.1038/s41467-019-09364-x
PaGeD_01320	GCA_003661825.1	SAMN09214927	PRJNA362212	doi.org/10.1038/s41467-019-09364-x
PaGeD_01321	GCA_003661845.1	SAMN09214997	PRJNA362212	doi.org/10.1038/s41467-019-09364-x
PaGeD_01322	GCA_003661865.1	SAMN09214926	PRJNA362212	doi.org/10.1038/s41467-019-09364-x
PaGeD_01323	GCA_003661885.1	SAMN09214996	PRJNA362212	doi.org/10.1038/s41467-019-09364-x
PaGeD_01324	GCA_003661905.1	SAMN09214995	PRJNA362212	doi.org/10.1038/s41467-019-09364-x
PaGeD_01325	GCA_003661915.1	SAMN09215211	PRJNA362212	doi.org/10.1038/s41467-019-09364-x
PaGeD_01326	GCA_003661945.1	SAMN09215195	PRJNA362212	doi.org/10.1038/s41467-019-09364-x
PaGeD_01327	GCA_003661965.1	SAMN09214918	PRJNA362212	doi.org/10.1038/s41467-019-09364-x
PaGeD_01328	GCA_003661975.1	SAMN09214917	PRJNA362212	doi.org/10.1038/s41467-019-09364-x
PaGeD_01329	GCA_003662005.1	SAMN09214776	PRJNA362212	doi.org/10.1038/s41467-019-09364-x
PaGeD_01330	GCA_003662025.1	SAMN09214839	PRJNA362212	doi.org/10.1038/s41467-019-09364-x
PaGeD_01331	GCA_003662035.1	SAMN09215041	PRJNA362212	doi.org/10.1038/s41467-019-09364-x
PaGeD_01332	GCA_003662065.1	SAMN09214916	PRJNA362212	doi.org/10.1038/s41467-019-09364-x
PaGeD_01333	GCA_003662085.1	SAMN09214775	PRJNA362212	doi.org/10.1038/s41467-019-09364-x
PaGeD_01334	GCA_003662095.1	SAMN09215040	PRJNA362212	doi.org/10.1038/s41467-019-09364-x
PaGeD_01335	GCA_003662125.1	SAMN09214915	PRJNA362212	doi.org/10.1038/s41467-019-09364-x
PaGeD_01336	GCA_003662145.1	SAMN09214914	PRJNA362212	doi.org/10.1038/s41467-019-09364-x
PaGeD_01337	GCA_003662155.1	SAMN09214867	PRJNA362212	doi.org/10.1038/s41467-019-09364-x
PaGeD_01338	GCA_003662185.1	SAMN09214866	PRJNA362212	doi.org/10.1038/s41467-019-09364-x
PaGeD_01339	GCA_003662205.1	SAMN09214865	PRJNA362212	doi.org/10.1038/s41467-019-09364-x
PaGeD_01340	GCA_003662215.1	SAMN09214993	PRJNA362212	doi.org/10.1038/s41467-019-09364-x
PaGeD_01341	GCA_003662245.1	SAMN09214992	PRJNA362212	doi.org/10.1038/s41467-019-09364-x
PaGeD_01342	GCA_003662265.1	SAMN09214774	PRJNA362212	doi.org/10.1038/s41467-019-09364-x
PaGeD_01343	GCA_003662275.1	SAMN09214864	PRJNA362212	doi.org/10.1038/s41467-019-09364-x
PaGeD_01344	GCA_003662305.1	SAMN09214863	PRJNA362212	doi.org/10.1038/s41467-019-09364-x
PaGeD_01345	GCA_003662325.1	SAMN09215194	PRJNA362212	doi.org/10.1038/s41467-019-09364-x
PaGeD_01346	GCA_003662345.1	SAMN09214773	PRJNA362212	doi.org/10.1038/s41467-019-09364-x
PaGeD_01347	GCA_003662365.1	SAMN09215193	PRJNA362212	doi.org/10.1038/s41467-019-09364-x
PaGeD_01348	GCA_003662385.1	SAMN09215039	PRJNA362212	doi.org/10.1038/s41467-019-09364-x
PaGeD_01349	GCA_003662395.1	SAMN09214772	PRJNA362212	doi.org/10.1038/s41467-019-09364-x
PaGeD_01350	GCA_003662425.1	SAMN09215038	PRJNA362212	doi.org/10.1038/s41467-019-09364-x
PaGeD_01351	GCA_003662445.1	SAMN09214913	PRJNA362212	doi.org/10.1038/s41467-019-09364-x
PaGeD_01352	GCA_003662455.1	SAMN09214991	PRJNA362212	doi.org/10.1038/s41467-019-09364-x
PaGeD_01353	GCA_003662485.1	SAMN09214990	PRJNA362212	doi.org/10.1038/s41467-019-09364-x
PaGeD_01354	GCA_003662505.1	SAMN09214862	PRJNA362212	doi.org/10.1038/s41467-019-09364-x
PaGeD_01355	GCA_003662515.1	SAMN09214989	PRJNA362212	doi.org/10.1038/s41467-019-09364-x
PaGeD_01356	GCA_003662535.1	SAMN09214771	PRJNA362212	doi.org/10.1038/s41467-019-09364-x
PaGeD_01357	GCA_003662565.1	SAMN09214988	PRJNA362212	doi.org/10.1038/s41467-019-09364-x
PaGeD_01358	GCA_003662585.1	SAMN09214861	PRJNA362212	doi.org/10.1038/s41467-019-09364-x
PaGeD_01359	GCA_003662595.1	SAMN09214838	PRJNA362212	doi.org/10.1038/s41467-019-09364-x
PaGeD_01360	GCA_003662625.1	SAMN09215037	PRJNA362212	doi.org/10.1038/s41467-019-09364-x
PaGeD_01361	GCA_003662645.1	SAMN09214987	PRJNA362212	doi.org/10.1038/s41467-019-09364-x
PaGeD_01362	GCA_003662655.1	SAMN09215036	PRJNA362212	doi.org/10.1038/s41467-019-09364-x
PaGeD_01363	GCA_003662685.1	SAMN09215035	PRJNA362212	doi.org/10.1038/s41467-019-09364-x
PaGeD_01364	GCA_003662705.1	SAMN09214846	PRJNA362212	doi.org/10.1038/s41467-019-09364-x
PaGeD_01365	GCA_003662715.1	SAMN09214860	PRJNA362212	doi.org/10.1038/s41467-019-09364-x
PaGeD_01366	GCA_003662745.1	SAMN09214837	PRJNA362212	doi.org/10.1038/s41467-019-09364-x
PaGeD_01367	GCA_003662765.1	SAMN09215305	PRJNA362212	doi.org/10.1038/s41467-019-09364-x
PaGeD_01368	GCA_003662775.1	SAMN09214824	PRJNA362212	doi.org/10.1038/s41467-019-09364-x
PaGeD_01369	GCA_003662805.1	SAMN09214823	PRJNA362212	doi.org/10.1038/s41467-019-09364-x
PaGeD_01370	GCA_003662815.1	SAMN09215087	PRJNA362212	doi.org/10.1038/s41467-019-09364-x
PaGeD_01371	GCA_003662835.1	SAMN09214822	PRJNA362212	doi.org/10.1038/s41467-019-09364-x
PaGeD_01372	GCA_003662865.1	SAMN09215251	PRJNA362212	doi.org/10.1038/s41467-019-09364-x
PaGeD_01373	GCA_003662875.1	SAMN09215240	PRJNA362212	doi.org/10.1038/s41467-019-09364-x
PaGeD_01374	GCA_003662885.1	SAMN09215069	PRJNA362212	doi.org/10.1038/s41467-019-09364-x
PaGeD_01375	GCA_003662925.1	SAMN09215012	PRJNA362212	doi.org/10.1038/s41467-019-09364-x
PaGeD_01376	GCA_003662935.1	SAMN09214805	PRJNA362212	doi.org/10.1038/s41467-019-09364-x
PaGeD_01377	GCA_003662965.1	SAMN09214879	PRJNA362212	doi.org/10.1038/s41467-019-09364-x
PaGeD_01378	GCA_003662985.1	SAMN09214878	PRJNA362212	doi.org/10.1038/s41467-019-09364-x
PaGeD_01379	GCA_003662995.1	SAMN09214939	PRJNA362212	doi.org/10.1038/s41467-019-09364-x
PaGeD_01380	GCA_003663025.1	SAMN09215056	PRJNA362212	doi.org/10.1038/s41467-019-09364-x
PaGeD_01381	GCA_003663045.1	SAMN09214942	PRJNA362212	doi.org/10.1038/s41467-019-09364-x
PaGeD_01382	GCA_003663055.1	SAMN09215055	PRJNA362212	doi.org/10.1038/s41467-019-09364-x
PaGeD_01383	GCA_003663075.1	SAMN09215223	PRJNA362212	doi.org/10.1038/s41467-019-09364-x
PaGeD_01384	GCA_003663105.1	SAMN09215060	PRJNA362212	doi.org/10.1038/s41467-019-09364-x
PaGeD_01385	GCA_003663115.1	SAMN09215059	PRJNA362212	doi.org/10.1038/s41467-019-09364-x
PaGeD_01386	GCA_003663125.1	SAMN09215222	PRJNA362212	doi.org/10.1038/s41467-019-09364-x
PaGeD_01387	GCA_003663165.1	SAMN09214881	PRJNA362212	doi.org/10.1038/s41467-019-09364-x
PaGeD_01388	GCA_003663175.1	SAMN09215058	PRJNA362212	doi.org/10.1038/s41467-019-09364-x
PaGeD_01389	GCA_003663205.1	SAMN09214792	PRJNA362212	doi.org/10.1038/s41467-019-09364-x
PaGeD_01390	GCA_003663225.1	SAMN09214909	PRJNA362212	doi.org/10.1038/s41467-019-09364-x
PaGeD_01391	GCA_003663235.1	SAMN09214910	PRJNA362212	doi.org/10.1038/s41467-019-09364-x
PaGeD_01392	GCA_003663265.1	SAMN09215181	PRJNA362212	doi.org/10.1038/s41467-019-09364-x
PaGeD_01393	GCA_003663285.1	SAMN09214765	PRJNA362212	doi.org/10.1038/s41467-019-09364-x
PaGeD_01394	GCA_003663295.1	SAMN09215180	PRJNA362212	doi.org/10.1038/s41467-019-09364-x
PaGeD_01395	GCA_003663325.1	SAMN09215179	PRJNA362212	doi.org/10.1038/s41467-019-09364-x
PaGeD_01396	GCA_003663345.1	SAMN09214857	PRJNA362212	doi.org/10.1038/s41467-019-09364-x
PaGeD_01397	GCA_003663355.1	SAMN09214856	PRJNA362212	doi.org/10.1038/s41467-019-09364-x
PaGeD_01398	GCA_003663385.1	SAMN09214764	PRJNA362212	doi.org/10.1038/s41467-019-09364-x
PaGeD_01399	GCA_003663405.1	SAMN09215178	PRJNA362212	doi.org/10.1038/s41467-019-09364-x
PaGeD_01400	GCA_003663415.1	SAMN09214763	PRJNA362212	doi.org/10.1038/s41467-019-09364-x
PaGeD_01401	GCA_003663445.1	SAMN09214908	PRJNA362212	doi.org/10.1038/s41467-019-09364-x
PaGeD_01402	GCA_003663465.1	SAMN09215177	PRJNA362212	doi.org/10.1038/s41467-019-09364-x
PaGeD_01403	GCA_003663475.1	SAMN09214907	PRJNA362212	doi.org/10.1038/s41467-019-09364-x
PaGeD_01404	GCA_003663505.1	SAMN09215062	PRJNA362212	doi.org/10.1038/s41467-019-09364-x
PaGeD_01405	GCA_003663525.1	SAMN09214882	PRJNA362212	doi.org/10.1038/s41467-019-09364-x
PaGeD_01406	GCA_003663535.1	SAMN09214848	PRJNA362212	doi.org/10.1038/s41467-019-09364-x
PaGeD_01407	GCA_003663565.1	SAMN09215143	PRJNA362212	doi.org/10.1038/s41467-019-09364-x
PaGeD_01408	GCA_003663585.1	SAMN09214945	PRJNA362212	doi.org/10.1038/s41467-019-09364-x
PaGeD_01409	GCA_003663595.1	SAMN09215230	PRJNA362212	doi.org/10.1038/s41467-019-09364-x
PaGeD_01410	GCA_003663625.1	SAMN09214944	PRJNA362212	doi.org/10.1038/s41467-019-09364-x
PaGeD_01411	GCA_003663645.1	SAMN09215063	PRJNA362212	doi.org/10.1038/s41467-019-09364-x
PaGeD_01412	GCA_003663665.1	SAMN09214883	PRJNA362212	doi.org/10.1038/s41467-019-09364-x
PaGeD_01413	GCA_003663685.1	SAMN09215228	PRJNA362212	doi.org/10.1038/s41467-019-09364-x
PaGeD_01414	GCA_003663695.1	SAMN09215227	PRJNA362212	doi.org/10.1038/s41467-019-09364-x
PaGeD_01415	GCA_003940385.1	SAMN07462257	PRJNA308326	doi.org/10.1038/nmicrobiol.2016.146
PaGeD_01416	GCA_003940405.1	SAMN07462258	PRJNA308326	doi.org/10.1038/nmicrobiol.2016.146
PaGeD_01417	GCA_004104135.1	SAMN07462262	PRJNA308326	doi.org/10.1038/nmicrobiol.2016.146
PaGeD_01418	GCA_004211975.1	SAMN10390739	PRJNA472146	doi.org/10.1038/s41564-019-0363-3
PaGeD_01419	GCA_004212035.1	SAMN10390737	PRJNA472146	doi.org/10.1038/s41564-019-0363-3
PaGeD_01420	GCA_004212055.1	SAMN10390736	PRJNA472146	doi.org/10.1038/s41564-019-0363-3
PaGeD_01421	GCA_004212075.1	SAMN10390728	PRJNA472146	doi.org/10.1038/s41564-019-0363-3
PaGeD_01422	GCA_004212085.1	SAMN10390732	PRJNA472146	doi.org/10.1038/s41564-019-0363-3
PaGeD_01423	GCA_004212095.1	SAMN10390738	PRJNA472146	doi.org/10.1038/s41564-019-0363-3
PaGeD_01424	GCA_004212135.1	SAMN10387997	PRJNA472146	doi.org/10.1038/s41564-019-0363-3
PaGeD_01425	GCA_004212145.1	SAMN10390735	PRJNA472146	doi.org/10.1038/s41564-019-0363-3
PaGeD_01426	GCA_004212155.1	SAMN10390733	PRJNA472146	doi.org/10.1038/s41564-019-0363-3
PaGeD_01427	GCA_004374725.1	SAMN11124425	PRJNA485648	doi.org/10.1038/s41467-019-09747-0
PaGeD_01428	GCA_004375635.1	SAMN11124434	PRJNA485648	doi.org/10.1038/s41467-019-09747-0
PaGeD_01429	GCA_004375675.1	SAMN11124432	PRJNA485648	doi.org/10.1038/s41467-019-09747-0
PaGeD_01430	GCA_004375695.1	SAMN11124431	PRJNA485648	doi.org/10.1038/s41467-019-09747-0
PaGeD_01431	GCA_004375715.1	SAMN11124430	PRJNA485648	doi.org/10.1038/s41467-019-09747-0
PaGeD_01432	GCA_004375725.1	SAMN11124433	PRJNA485648	doi.org/10.1038/s41467-019-09747-0
PaGeD_01433	GCA_004375765.1	SAMN11124428	PRJNA485648	doi.org/10.1038/s41467-019-09747-0
PaGeD_01434	GCA_004375775.1	SAMN11124429	PRJNA485648	doi.org/10.1038/s41467-019-09747-0
PaGeD_01435	GCA_004375785.1	SAMN11124427	PRJNA485648	doi.org/10.1038/s41467-019-09747-0
PaGeD_01436	GCA_004375795.1	SAMN11124420	PRJNA485648	doi.org/10.1038/s41467-019-09747-0
PaGeD_01437	GCA_004375805.1	SAMN11124397	PRJNA485648	doi.org/10.1038/s41467-019-09747-0
PaGeD_01438	GCA_004375865.1	SAMN11124404	PRJNA485648	doi.org/10.1038/s41467-019-09747-0
PaGeD_01439	GCA_004375875.1	SAMN11124419	PRJNA485648	doi.org/10.1038/s41467-019-09747-0
PaGeD_01440	GCA_004375885.1	SAMN11124395	PRJNA485648	doi.org/10.1038/s41467-019-09747-0
PaGeD_01441	GCA_004375895.1	SAMN11124411	PRJNA485648	doi.org/10.1038/s41467-019-09747-0
PaGeD_01442	GCA_004375905.1	SAMN11124385	PRJNA485648	doi.org/10.1038/s41467-019-09747-0
PaGeD_01443	GCA_004375965.1	SAMN11124381	PRJNA485648	doi.org/10.1038/s41467-019-09747-0
PaGeD_01444	GCA_004375975.1	SAMN11124361	PRJNA485648	doi.org/10.1038/s41467-019-09747-0
PaGeD_01445	GCA_004376075.1	SAMN11124405	PRJNA485648	doi.org/10.1038/s41467-019-09747-0
PaGeD_01446	GCA_004376105.1	SAMN11124415	PRJNA485648	doi.org/10.1038/s41467-019-09747-0
PaGeD_01447	GCA_004376115.1	SAMN11124398	PRJNA485648	doi.org/10.1038/s41467-019-09747-0
PaGeD_01448	GCA_004376185.1	SAMN11124399	PRJNA485648	doi.org/10.1038/s41467-019-09747-0
PaGeD_01449	GCA_004376205.1	SAMN11124421	PRJNA485648	doi.org/10.1038/s41467-019-09747-0
PaGeD_01450	GCA_004376215.1	SAMN11124423	PRJNA485648	doi.org/10.1038/s41467-019-09747-0
PaGeD_01451	GCA_004376225.1	SAMN11124424	PRJNA485648	doi.org/10.1038/s41467-019-09747-0
PaGeD_01452	GCA_004376265.1	SAMN11124426	PRJNA485648	doi.org/10.1038/s41467-019-09747-0
PaGeD_01453	GCA_004376295.1	SAMN11124414	PRJNA485648	doi.org/10.1038/s41467-019-09747-0
PaGeD_01454	GCA_004376305.1	SAMN11124418	PRJNA485648	doi.org/10.1038/s41467-019-09747-0
PaGeD_01455	GCA_004376325.1	SAMN11124417	PRJNA485648	doi.org/10.1038/s41467-019-09747-0
PaGeD_01456	GCA_004376345.1	SAMN11124416	PRJNA485648	doi.org/10.1038/s41467-019-09747-0
PaGeD_01457	GCA_004376375.1	SAMN11124412	PRJNA485648	doi.org/10.1038/s41467-019-09747-0
PaGeD_01458	GCA_004376385.1	SAMN11124413	PRJNA485648	doi.org/10.1038/s41467-019-09747-0
PaGeD_01459	GCA_004376425.1	SAMN11124422	PRJNA485648	doi.org/10.1038/s41467-019-09747-0
PaGeD_01460	GCA_004376435.1	SAMN11124407	PRJNA485648	doi.org/10.1038/s41467-019-09747-0
PaGeD_01461	GCA_004376455.1	SAMN11124410	PRJNA485648	doi.org/10.1038/s41467-019-09747-0
PaGeD_01462	GCA_004376465.1	SAMN11124409	PRJNA485648	doi.org/10.1038/s41467-019-09747-0
PaGeD_01463	GCA_004376485.1	SAMN11124408	PRJNA485648	doi.org/10.1038/s41467-019-09747-0
PaGeD_01464	GCA_004376495.1	SAMN11124406	PRJNA485648	doi.org/10.1038/s41467-019-09747-0
PaGeD_01465	GCA_004376535.1	SAMN11124401	PRJNA485648	doi.org/10.1038/s41467-019-09747-0
PaGeD_01466	GCA_004376545.1	SAMN11124400	PRJNA485648	doi.org/10.1038/s41467-019-09747-0
PaGeD_01467	GCA_004376575.1	SAMN11124402	PRJNA485648	doi.org/10.1038/s41467-019-09747-0
PaGeD_01468	GCA_004376595.1	SAMN11124396	PRJNA485648	doi.org/10.1038/s41467-019-09747-0
PaGeD_01469	GCA_004376605.1	SAMN11124403	PRJNA485648	doi.org/10.1038/s41467-019-09747-0
PaGeD_01470	GCA_004376625.1	SAMN11124394	PRJNA485648	doi.org/10.1038/s41467-019-09747-0
PaGeD_01471	GCA_004376645.1	SAMN11124391	PRJNA485648	doi.org/10.1038/s41467-019-09747-0
PaGeD_01472	GCA_004376685.1	SAMN11124393	PRJNA485648	doi.org/10.1038/s41467-019-09747-0
PaGeD_01473	GCA_004376695.1	SAMN11124390	PRJNA485648	doi.org/10.1038/s41467-019-09747-0
PaGeD_01474	GCA_004376705.1	SAMN11124392	PRJNA485648	doi.org/10.1038/s41467-019-09747-0
PaGeD_01475	GCA_004376735.1	SAMN11124383	PRJNA485648	doi.org/10.1038/s41467-019-09747-0
PaGeD_01476	GCA_004376755.1	SAMN11124354	PRJNA485648	doi.org/10.1038/s41467-019-09747-0
PaGeD_01477	GCA_004376765.1	SAMN11124368	PRJNA485648	doi.org/10.1038/s41467-019-09747-0
PaGeD_01478	GCA_004376775.1	SAMN11124372	PRJNA485648	doi.org/10.1038/s41467-019-09747-0
PaGeD_01479	GCA_004376785.1	SAMN11124387	PRJNA485648	doi.org/10.1038/s41467-019-09747-0
PaGeD_01480	GCA_004376885.1	SAMN11124388	PRJNA485648	doi.org/10.1038/s41467-019-09747-0
PaGeD_01481	GCA_004376895.1	SAMN11124370	PRJNA485648	doi.org/10.1038/s41467-019-09747-0
PaGeD_01482	GCA_004376965.1	SAMN11124386	PRJNA485648	doi.org/10.1038/s41467-019-09747-0
PaGeD_01483	GCA_004376975.1	SAMN11124389	PRJNA485648	doi.org/10.1038/s41467-019-09747-0
PaGeD_01484	GCA_004376985.1	SAMN11124382	PRJNA485648	doi.org/10.1038/s41467-019-09747-0
PaGeD_01485	GCA_004376995.1	SAMN11124380	PRJNA485648	doi.org/10.1038/s41467-019-09747-0
PaGeD_01486	GCA_004377005.1	SAMN11124384	PRJNA485648	doi.org/10.1038/s41467-019-09747-0
PaGeD_01487	GCA_004377065.1	SAMN11124371	PRJNA485648	doi.org/10.1038/s41467-019-09747-0
PaGeD_01488	GCA_004377085.1	SAMN11124379	PRJNA485648	doi.org/10.1038/s41467-019-09747-0
PaGeD_01489	GCA_004377095.1	SAMN11124378	PRJNA485648	doi.org/10.1038/s41467-019-09747-0
PaGeD_01490	GCA_004377125.1	SAMN11124377	PRJNA485648	doi.org/10.1038/s41467-019-09747-0
PaGeD_01491	GCA_004377135.1	SAMN11124355	PRJNA485648	doi.org/10.1038/s41467-019-09747-0
PaGeD_01492	GCA_004377185.1	SAMN11124375	PRJNA485648	doi.org/10.1038/s41467-019-09747-0
PaGeD_01493	GCA_004377195.1	SAMN11124376	PRJNA485648	doi.org/10.1038/s41467-019-09747-0
PaGeD_01494	GCA_004377205.1	SAMN11124374	PRJNA485648	doi.org/10.1038/s41467-019-09747-0
PaGeD_01495	GCA_004377235.1	SAMN11124369	PRJNA485648	doi.org/10.1038/s41467-019-09747-0
PaGeD_01496	GCA_004377245.1	SAMN11124373	PRJNA485648	doi.org/10.1038/s41467-019-09747-0
PaGeD_01497	GCA_004377265.1	SAMN11124366	PRJNA485648	doi.org/10.1038/s41467-019-09747-0
PaGeD_01498	GCA_004377275.1	SAMN11124365	PRJNA485648	doi.org/10.1038/s41467-019-09747-0
PaGeD_01499	GCA_004377305.1	SAMN11124367	PRJNA485648	doi.org/10.1038/s41467-019-09747-0
PaGeD_01500	GCA_004377325.1	SAMN11124358	PRJNA485648	doi.org/10.1038/s41467-019-09747-0
PaGeD_01501	GCA_004377355.1	SAMN11124364	PRJNA485648	doi.org/10.1038/s41467-019-09747-0
PaGeD_01502	GCA_004377365.1	SAMN11124362	PRJNA485648	doi.org/10.1038/s41467-019-09747-0
PaGeD_01503	GCA_004377395.1	SAMN11124360	PRJNA485648	doi.org/10.1038/s41467-019-09747-0
PaGeD_01504	GCA_004377405.1	SAMN11124357	PRJNA485648	doi.org/10.1038/s41467-019-09747-0
PaGeD_01505	GCA_004377415.1	SAMN11124359	PRJNA485648	doi.org/10.1038/s41467-019-09747-0
PaGeD_01506	GCA_004377445.1	SAMN11124356	PRJNA485648	doi.org/10.1038/s41467-019-09747-0
PaGeD_01507	GCA_004378645.1	SAMN11124435	PRJNA485648	doi.org/10.1038/s41467-019-09747-0
PaGeD_01508	GCA_004378665.1	SAMN11124363	PRJNA485648	doi.org/10.1038/s41467-019-09747-0
PaGeD_01509	GCA_004563595.1	SAMN05179569	PRJNA320927	doi.org/10.1073/pnas.1703424114
PaGeD_01510	GCA_005191415.1	SAMN09406154	PRJNA362212	doi.org/10.1186/s40168-017-0322-2
PaGeD_01511	GCA_005191425.1	SAMN09406172	PRJNA362212	doi.org/10.1186/s40168-017-0322-2
PaGeD_01512	GCA_002162375.1	SAMN06234459	PRJNA362330	doi.org/10.1007/978-3-030-14796-9_23
PaGeD_01513	NA	NA	NA	doi.org/10.1128/msystems.00245-21
PaGeD_01514	NA	NA	NA	doi.org/10.1128/msystems.00245-21
PaGeD_01515	NA	NA	NA	doi.org/10.1128/msystems.00245-21
PaGeD_01516	NA	NA	NA	doi.org/10.1128/msystems.00245-21
PaGeD_01517	NA	NA	NA	doi.org/10.1128/msystems.00245-21
PaGeD_01518	NA	NA	NA	doi.org/10.1128/msystems.00245-21
PaGeD_01519	NA	NA	NA	doi.org/10.1128/msystems.00245-21
PaGeD_01520	NA	NA	NA	doi.org/10.1128/msystems.00245-21
PaGeD_01521	NA	NA	NA	doi.org/10.1128/msystems.00245-21
PaGeD_01522	NA	NA	NA	doi.org/10.1128/msystems.00245-21
PaGeD_01523	NA	NA	NA	doi.org/10.1128/msystems.00245-21
PaGeD_01524	NA	NA	NA	doi.org/10.1128/msystems.00245-21
PaGeD_01525	NA	NA	NA	doi.org/10.1128/msystems.00245-21
PaGeD_01526	NA	NA	NA	doi.org/10.1128/msystems.00245-21
PaGeD_01527	NA	NA	NA	doi.org/10.1128/msystems.00245-21
PaGeD_01528	NA	NA	NA	doi.org/10.1128/msystems.00245-21
PaGeD_01529	NA	NA	NA	doi.org/10.1128/msystems.00245-21
PaGeD_01530	NA	NA	NA	doi.org/10.1128/msystems.00245-21
PaGeD_01531	NA	NA	NA	doi.org/10.1128/msystems.00245-21
PaGeD_01532	NA	NA	NA	doi.org/10.1128/msystems.00245-21
PaGeD_01533	NA	NA	NA	doi.org/10.1128/msystems.00245-21
PaGeD_01534	NA	NA	NA	doi.org/10.1128/msystems.00245-21
PaGeD_01535	NA	NA	NA	doi.org/10.1111/1462-2920.16251
PaGeD_01536	NA	NA	NA	doi.org/10.1111/1462-2920.16251
PaGeD_01537	GCA_000015745.1	SAMN02603899	PRJNA18655	doi.org/10.1073/pnas.0609650104
PaGeD_01538	GCA_000016785.1	SAMN02598377	PRJNA17089	doi.org/10.1073/pnas.0901260106
PaGeD_01539	GCA_000018605.1	SAMN00623056	PRJNA17679	Unpublished
PaGeD_01540	GCA_000021285.1	SAMN02603170	PRJNA27767	doi.org/10.1128/JB.01448-08
PaGeD_01541	GCA_000143985.1	SAMN00017394	PRJNA32637	doi.org/10.1128/mbio.01669-15
PaGeD_01542	GCA_000147875.1	SAMN00017400	PRJNA40773	doi.org/10.4056/sigs.1183143
PaGeD_01543	GCA_000192745.1	SAMN02603150	PRJNA63293	doi.org/10.1371/journal.pone.0031261
PaGeD_01544	GCA_000214705.1	SAMN00713629	PRJNA48313	doi.org/10.1128/mbio.01669-15
PaGeD_01545	GCA_000220645.1	SAMN02603718	PRJNA68579	doi.org/10.1128/JB.05835-11
PaGeD_01546	GCA_000224695.2	SAMN02470954	PRJNA71691	doi.org/10.1371/journal.pone.0010018
PaGeD_01547	GCA_000256505.1	SAMN02470971	PRJNA82321	doi.org/10.1128/jb.00555-12
PaGeD_01548	GCA_000283055.1	SAMN02470947	PRJNA170819	doi.org/10.1128/jb.01499-12
PaGeD_01549	GCA_000287815.2	SAMN00996515	PRJNA167366	doi.org/10.1016/j.ygeno.2014.12.006
PaGeD_01550	GCA_000300005.1	SAMN02603961	PRJNA60443	doi.org/10.1128/jb.01813-12
PaGeD_01551	GCA_000300515.1	SAMN02471165	PRJNA175132	doi.org/10.1128/jb.01917-12
PaGeD_01552	GCA_000300995.1	SAMN02471206	PRJNA161091	doi.org/10.1128/jb.01849-12
PaGeD_01553	GCA_000325625.1	SAMN00998637	PRJNA167644	doi.org/10.1128/AEM.01117-09
PaGeD_01554	GCA_000379485.1	SAMN02256455	PRJNA165257	doi.org/10.4056/sigs.5601028
PaGeD_01555	GCA_000428885.1	SAMN02441206	PRJNA185357	Unpublished
PaGeD_01556	GCA_000442595.1	SAMN02603046	PRJNA201013	doi.org/10.1016/j.margen.2015.10.006
PaGeD_01557	GCA_000444805.1	SAMN02471694	PRJNA209569	doi.org/10.1128/genomea.00707-13
PaGeD_01558	GCA_000444935.1	SAMN02469787	PRJNA200548	doi.org/10.1128/genomea.00536-13
PaGeD_01559	GCA_000445185.1	SAMN02212367	PRJNA209289	doi.org/10.1128/genomeA.00701-13
PaGeD_01560	GCA_000445205.1	SAMN02212367	PRJNA210020	Unpublished
PaGeD_01561	GCA_000495415.1	SAMN02303524	PRJNA213885	doi.org/10.1038/ismej.2013.187
PaGeD_01562	GCA_000498575.1	SAMN02470138	PRJNA217843	doi.org/10.1128/genomeA.00818-13
PaGeD_01563	GCA_000503775.1	SAMN02378363	PRJNA223198	doi.org/10.1128/genomea.01215-13
PaGeD_01564	GCA_000503935.1	SAMN02641589	PRJNA227487	doi.org/10.1128/genomea.01274-13
PaGeD_01565	GCA_000505825.1	SAMN02469585	PRJNA222564	doi.org/10.1128/genomeA.00002-14
PaGeD_01566	GCA_000506985.1	SAMN02404614	PRJNA228954	doi.org/10.1128/genomea.00003-14
PaGeD_01567	GCA_000524665.1	SAMN02641499	PRJNA231302	doi.org/10.1128/genomeA.01277-14
PaGeD_01568	GCA_000585625.1	SAMN02643445	PRJNA238382	doi.org/10.1128/genomea.00984-15
PaGeD_01569	GCA_000585655.1	SAMN02644454	PRJNA238403	doi.org/10.1128/genomea.00867-15
PaGeD_01570	GCA_000612125.1	SAMN02585235	PRJNA233552	doi.org/10.1016/j.margen.2014.08.006
PaGeD_01571	GCA_000612165.1	SAMN02585215	PRJNA233555	doi.org/10.1016/j.margen.2014.09.007
PaGeD_01572	GCA_000612205.1	SAMN02592616	PRJNA233558	doi.org/10.1186/1944-3277-10-9
PaGeD_01573	GCA_000612225.1	SAMN02592617	PRJNA233560	doi.org/10.1186/s40793-015-0125-7
PaGeD_01574	GCA_000612245.1	SAMN02592615	PRJNA233556	doi.org/10.1631/jzus.B1500029
PaGeD_01575	GCA_000612265.1	SAMN02592613	PRJNA233553	doi.org/10.1016/j.margen.2014.09.005
PaGeD_01576	GCA_000715185.1	SAMN02786784	PRJNA246604	doi.org/10.1128/genomea.00642-14
PaGeD_01577	GCA_000734035.1	SAMN03081472	PRJNA208006	doi.org/10.1186/s40793-017-0296-5
PaGeD_01578	GCA_000761445.1	SAMN03024267	PRJNA260595	doi.org/10.1128/genomea.00469-15
PaGeD_01579	GCA_000768065.1	SAMN03075592	PRJNA258596	doi.org/10.1128/genomea.01271-14
PaGeD_01580	GCA_000769515.1	SAMN03083512	PRJNA262507	doi.org/10.1128/genomea.01163-14
PaGeD_01581	GCA_000784785.1	SAMN03143095	PRJNA176019	doi.org/10.1038/ismej.2014.238
PaGeD_01582	GCA_000787655.1	SAMD00020208	PRJDB2892	doi.org/10.1128/genomeA.00766-14
PaGeD_01583	GCA_000789415.1	SAMN03140276	PRJNA245339	doi.org/10.1128/genomeA.01336-14
PaGeD_01584	GCA_000803285.1	SAMN02712087	PRJNA243021	doi.org/10.1128/genomeA.01430-14
PaGeD_01585	GCA_000812065.1	SAMN02980920	PRJNA257946	doi.org/10.1128/genomeA.00013-15
PaGeD_01586	GCA_001010305.1	SAMD00029743	PRJDB2892	doi.org/10.1128/genomeA.01430-14
PaGeD_01587	GCA_001010485.1	SAMD00018699	PRJDB2892	doi.org/10.1128/genomeA.00643-15
PaGeD_01588	GCA_001010505.1	SAMD00018424	PRJDB2892	doi.org/10.1128/genomeA.00643-15
PaGeD_01589	GCA_001038645.1	SAMN03765687	PRJNA286160	doi.org/10.1016/j.jbiotec.2015.06.421
PaGeD_01590	GCA_001077855.1	SAMN03733603	PRJNA284217	doi.org/10.1016/j.ygeno.2017.06.002
PaGeD_01591	GCA_001278715.1	SAMN04008121	PRJNA293585	doi.org/10.1016/j.jbiotec.2016.03.018
PaGeD_01592	GCA_001439585.2	SAMN03777308	PRJNA287204	doi.org/10.1016/j.jbiotec.2016.03.056
PaGeD_01593	GCA_001454985.1	SAMN04281197	PRJNA302833	Unpublished
PaGeD_01594	GCA_001483235.1	SAMN04325380	PRJNA305457	Unpublished
PaGeD_01595	GCA_001518015.1	SAMN04324894	PRJNA305382	doi.org/10.1186/s40793-016-0201-7
PaGeD_01596	GCA_001575025.2	SAMN04334590	PRJNA305687	doi.org/10.1128/genomea.00116-17
PaGeD_01597	GCA_001575035.2	SAMN04331779	PRJNA305687	doi.org/10.1128/genomea.00116-17
PaGeD_01598	GCA_001593645.1	SAMN04532519	PRJNA313000	doi.org/10.1016/j.micres.2021.126882
PaGeD_01599	GCA_001602235.1	SAMD00048769	PRJDB2892	doi.org/10.1128/genomeA.01430-14
PaGeD_01600	GCA_001602255.1	SAMD00048770	PRJDB2892	doi.org/10.1128/genomeA.00643-15
PaGeD_01601	GCA_001620265.1	SAMN03956960	PRJNA291966	doi.org/10.1016/j.jbiotec.2016.09.017
PaGeD_01602	GCA_001629795.1	SAMN04521049	PRJNA313406	doi.org/10.1128/genomea.00500-16
PaGeD_01603	GCA_001632595.1	SAMN04633529	PRJNA318163	doi.org/10.1128/genomea.00782-16
PaGeD_01604	GCA_001655645.1	SAMN04915186	PRJNA320062	doi.org/10.1128/genomea.00793-16
PaGeD_01605	GCA_001658045.1	SAMN04437166	PRJNA309628	Unpublished
PaGeD_01606	GCA_001683555.1	SAMN05258748	PRJNA309130	doi.org/10.1128/genomea.00899-16
PaGeD_01607	GCA_001722005.2	SAMN05717682	PRJNA341318	doi.org/10.1016/j.genrep.2017.04.001
PaGeD_01608	GCA_001730715.1	SAMN05730905	PRJNA341965	doi.org/10.1128/AEM.02659-16
PaGeD_01609	GCA_001865835.1	SAMN05933030	PRJNA349792	Unpublished
PaGeD_01610	GCA_001886715.1	SAMN06019995	PRJNA353759	doi.org/10.1016/j.ygeno.2018.02.010
PaGeD_01611	GCA_001889625.1	SAMN05231882	PRJNA326460	doi.org/10.1007/s10142-018-0604-1
PaGeD_01612	GCA_002024505.1	SAMN06229853	PRJNA361268	Unpublished
PaGeD_01613	GCA_002024885.1	SAMN06392749	PRJNA361268	Unpublished
PaGeD_01614	GCA_002056295.1	SAMN06197296	PRJNA359732	doi.org/10.1099/ijsem.0.003763
PaGeD_01615	GCA_002072815.1	SAMN03965495	PRJNA161089	doi.org/10.1016/j.margen.2017.05.010
PaGeD_01616	GCA_002093045.2	SAMN06644890	PRJNA380483	doi.org/10.1128/genomea.00589-17
PaGeD_01617	GCA_002119765.1	SAMN06886414	PRJNA385308	doi.org/10.1099/ijsem.0.000643
PaGeD_01618	GCA_002155045.1	SAMN06298242	PRJNA371364	doi.org/10.1128/genomea.00969-17
PaGeD_01619	GCA_002197985.1	SAMN06688252	PRJNA381708	doi.org/10.1128/genomea.00765-17
PaGeD_01620	GCA_002205435.1	SAMN07187745	PRJNA388844	Unpublished
PaGeD_01621	GCA_002213105.1	SAMN06607610	PRJNA379431	Unpublished
PaGeD_01622	GCA_002216165.1	SAMN07256639	PRJNA391029	Unpublished
PaGeD_01623	GCA_002254385.1	SAMN06647974	PRJNA362212	doi.org/10.1186/s40168-017-0322-2
PaGeD_01624	GCA_002254395.1	SAMN06647975	PRJNA362212	doi.org/10.1186/s40168-017-0322-2
PaGeD_01625	GCA_002254405.1	SAMN06647981	PRJNA362212	doi.org/10.1186/s40168-017-0322-2
PaGeD_01626	GCA_002254415.1	SAMN06647971	PRJNA362212	doi.org/10.1186/s40168-017-0322-2
PaGeD_01627	GCA_002254465.1	SAMN06647969	PRJNA362212	doi.org/10.1186/s40168-017-0322-2
PaGeD_01628	GCA_002254475.1	SAMN06647968	PRJNA362212	doi.org/10.1186/s40168-017-0322-2
PaGeD_01629	GCA_002254485.1	SAMN06647965	PRJNA362212	doi.org/10.1186/s40168-017-0322-2
PaGeD_01630	GCA_002254495.1	SAMN06647964	PRJNA362212	doi.org/10.1186/s40168-017-0322-2
PaGeD_01631	GCA_002254545.1	SAMN06647962	PRJNA362212	doi.org/10.1186/s40168-017-0322-2
PaGeD_01632	GCA_002254565.1	SAMN06647956	PRJNA362212	doi.org/10.1186/s40168-017-0322-2
PaGeD_01633	GCA_002254595.1	SAMN06647953	PRJNA362212	doi.org/10.1186/s40168-017-0322-2
PaGeD_01634	GCA_002254645.1	SAMN06647978	PRJNA362212	doi.org/10.1186/s40168-017-0322-2
PaGeD_01635	GCA_002254665.1	SAMN06647973	PRJNA362212	doi.org/10.1186/s40168-017-0322-2
PaGeD_01636	GCA_002254685.1	SAMN06647972	PRJNA362212	doi.org/10.1186/s40168-017-0322-2
PaGeD_01637	GCA_002254705.1	SAMN06647977	PRJNA362212	doi.org/10.1186/s40168-017-0322-2
PaGeD_01638	GCA_002254745.1	SAMN06647959	PRJNA362212	doi.org/10.1186/s40168-017-0322-2
PaGeD_01639	GCA_002254765.1	SAMN06647967	PRJNA362212	doi.org/10.1186/s40168-017-0322-2
PaGeD_01640	GCA_002254785.1	SAMN06647984	PRJNA362212	doi.org/10.1186/s40168-017-0322-2
PaGeD_01641	GCA_002254805.1	SAMN06647966	PRJNA362212	doi.org/10.1186/s40168-017-0322-2
PaGeD_01642	GCA_002254825.2	SAMN06647985	PRJNA362212	doi.org/10.1186/s40168-017-0322-2
PaGeD_01643	GCA_002254885.1	SAMN06647982	PRJNA362212	doi.org/10.1186/s40168-017-0322-2
PaGeD_01644	GCA_002254895.1	SAMN06647986	PRJNA362212	doi.org/10.1186/s40168-017-0322-2
PaGeD_01645	GCA_002254905.1	SAMN06647979	PRJNA362212	doi.org/10.1186/s40168-017-0322-2
PaGeD_01646	GCA_002254945.1	SAMN06647970	PRJNA362212	doi.org/10.1186/s40168-017-0322-2
PaGeD_01647	GCA_002254965.1	SAMN06647963	PRJNA362212	doi.org/10.1186/s40168-017-0322-2
PaGeD_01648	GCA_002254975.1	SAMN06647961	PRJNA362212	doi.org/10.1186/s40168-017-0322-2
PaGeD_01649	GCA_002254985.1	SAMN06647960	PRJNA362212	doi.org/10.1186/s40168-017-0322-2
PaGeD_01650	GCA_002255025.1	SAMN06647950	PRJNA362212	doi.org/10.1186/s40168-017-0322-2
PaGeD_01651	GCA_002255045.1	SAMN06647958	PRJNA362212	doi.org/10.1186/s40168-017-0322-2
PaGeD_01652	GCA_002255055.1	SAMN06647952	PRJNA362212	doi.org/10.1186/s40168-017-0322-2
PaGeD_01653	GCA_002255065.1	SAMN06647957	PRJNA362212	doi.org/10.1186/s40168-017-0322-2
PaGeD_01654	GCA_002255105.1	SAMN06647949	PRJNA362212	doi.org/10.1186/s40168-017-0322-2
PaGeD_01655	GCA_002255125.1	SAMN06647954	PRJNA362212	doi.org/10.1186/s40168-017-0322-2
PaGeD_01656	GCA_002255135.1	SAMN06647951	PRJNA362212	doi.org/10.1186/s40168-017-0322-2
PaGeD_01657	GCA_002255165.1	SAMN06647955	PRJNA362212	doi.org/10.1186/s40168-017-0322-2
PaGeD_01658	GCA_002278075.1	SAMN07510739	PRJNA398462	doi.org/10.1038/s41598-018-36165-x
PaGeD_01659	GCA_002289575.1	SAMN07270680	PRJNA391560	Unpublished
PaGeD_01660	GCA_002354895.1	SAMN07178247	PRJNA388505	Unpublished
PaGeD_01661	GCA_002370525.1	SAMD00018975	PRJDB2892	doi.org/10.1128/genomeA.00643-15
PaGeD_01662	GCA_002370525.2	SAMD00018975	PRJDB2892	doi.org/10.1128/genomeA.01430-14
PaGeD_01663	GCA_002724055.1	SAMD00097891	PRJDB6440	doi.org/10.1128/genomea.01308-17
PaGeD_01664	GCA_002760435.1	SAMN02221881	PRJNA210019	Unpublished
PaGeD_01665	GCA_002837115.1	SAMN08124306	PRJNA231306	Unpublished
PaGeD_01666	GCA_002849615.1	SAMN07786958	PRJNA414362	Unpublished
PaGeD_01667	GCA_002869785.1	SAMN04157994	PRJNA298288	doi.org/10.1016/j.jbiotec.2017.12.013
PaGeD_01668	GCA_002880735.1	SAMN07787122	PRJNA414386	doi.org/10.1128/MRA.00856-18
PaGeD_01669	GCA_002895605.1	SAMN07817522	PRJNA230893	Unpublished
PaGeD_01670	GCA_002917905.1	SAMN08443948	PRJNA432330	doi.org/10.1128/genomeA.00301-18
PaGeD_01671	GCA_002934525.1	SAMN06295946	PRJNA369869	doi.org/10.3389/fmicb.2018.02646
PaGeD_01672	GCA_002973515.1	SAMN06296050	PRJNA370003	doi.org/10.1111/1462-2920.14467
PaGeD_01673	GCA_002993285.1	SAMN08634400	PRJNA436863	doi.org/10.1002/mbo3.754
PaGeD_01674	GCA_003008495.1	SAMN08643206	PRJNA437196	Unpublished
PaGeD_01675	GCA_003050615.1	SAMN07601762	PRJNA401265	Unpublished
PaGeD_01676	GCA_003076515.1	SAMN06948887	PRJNA386470	doi.org/10.1371/journal.pone.0221574
PaGeD_01677	GCA_003076535.1	SAMN07622372	PRJNA403940	Unpublished
PaGeD_01678	GCA_003205235.1	SAMN09280936	PRJNA473658	Unpublished
PaGeD_01679	GCA_003267925.1	SAMN04858689	PRJNA318620	doi.org/10.3389/fmicb.2017.01507
PaGeD_01680	GCA_003290465.1	SAMN09041722	PRJNA454794	doi.org/10.1016/j.syapm.2018.08.013
PaGeD_01681	GCA_003314795.2	SAMN09521592	PRJNA478628	doi.org/10.1038/s41597-019-0289-x
PaGeD_01682	GCA_003327425.1	SAMN09209487	PRJNA454794	doi.org/10.1016/j.syapm.2018.08.013
PaGeD_01683	GCA_003327435.1	SAMN09209462	PRJNA454794	doi.org/10.1016/j.syapm.2018.08.013
PaGeD_01684	GCA_003327455.1	SAMN09209427	PRJNA454794	doi.org/10.1016/j.syapm.2018.08.013
PaGeD_01685	GCA_003351125.1	SAMN02902607	PRJNA221344	Unpublished
PaGeD_01686	GCA_003413715.1	SAMN09767475	PRJNA485672	Unpublished
PaGeD_01687	GCA_003413835.1	SAMN09767472	PRJNA484258	Unpublished
PaGeD_01688	GCA_003426165.1	SAMN09760163	PRJNA454794	doi.org/10.1016/j.syapm.2018.08.013
PaGeD_01689	GCA_003429665.1	SAMN09781802	PRJNA485058	doi.org/10.1099/ijsem.0.004340
PaGeD_01690	GCA_003444685.1	SAMN03941568	PRJNA291326	doi.org/10.1016/j.syapm.2018.03.008
PaGeD_01691	GCA_003586265.1	SAMN08389690	PRJNA431365	doi.org/10.1007/s00284-019-01798-2
PaGeD_01692	GCA_003661605.2	SAMN09214986	PRJNA362212	doi.org/10.1186/s40168-017-0322-2
PaGeD_01693	GCA_003697785.1	SAMN08783551	PRJNA445385	doi.org/10.1099/ijsem.0.004036
PaGeD_01694	GCA_003800565.1	SAMN03112823	PRJNA193530	Unpublished
PaGeD_01695	GCA_003993775.1	SAMN10373676	PRJNA503788	doi.org/10.1099/ijsem.0.004294
PaGeD_01696	GCA_004000605.1	SAMN02442382	PRJNA230771	Unpublished
PaGeD_01697	GCA_004011905.1	SAMN08565628	PRJNA434635	Unpublished
PaGeD_01698	GCA_004028775.1	SAMN10531977	PRJNA414521	doi.org/10.3389/fmicb.2020.572252
PaGeD_01699	GCA_004102645.1	SAMN10641986	PRJNA414521	doi.org/10.3389/fmicb.2020.572252
PaGeD_01700	GCA_004153435.1	SAMN10824119	PRJNA517285	doi.org/10.1128/mra.00237-19
PaGeD_01701	GCA_004153505.1	SAMN10824117	PRJNA517285	doi.org/10.1128/mra.00237-19
PaGeD_01702	GCA_004153515.1	SAMN10824115	PRJNA517285	doi.org/10.1128/mra.00237-19
PaGeD_01703	GCA_004153525.1	SAMN10824116	PRJNA517285	doi.org/10.1128/mra.00237-19
PaGeD_01704	GCA_004153665.1	SAMN10824118	PRJNA517285	doi.org/10.1128/mra.00237-19
PaGeD_01705	GCA_004353525.2	SAMN10977731	PRJNA523471	doi.org/10.1099/ijsem.0.004178
PaGeD_01706	GCA_004684055.1	SAMN11286712	PRJNA529817	doi.org/10.3390/microorganisms8121967
PaGeD_01707	GCA_004768445.1	SAMN11295181	PRJNA530105	Unpublished
PaGeD_01708	GCA_005281675.1	SAMN04537382	PRJNA314549	Unpublished
PaGeD_01709	GCA_006704225.1	SAMN12129020	PRJNA550434	doi.org/10.1016/j.cbpc.2022.109268
PaGeD_01710	GCA_006802095.1	SAMN10839112	PRJNA517612	doi.org/10.3389/fmars.2019.00572
PaGeD_01711	GCA_006980705.1	SAMN10716029	PRJNA513900	doi.org/10.1099/ijsem.0.004297
PaGeD_01712	GCA_006980715.1	SAMN10716008	PRJNA513897	doi.org/10.1099/ijsem.0.004200
PaGeD_01713	GCA_008033725.1	SAMN08915618	PRJNA449643	doi.org/10.3389/fmicb.2020.00519
PaGeD_01714	GCA_008033745.1	SAMN08918338	PRJNA449809	doi.org/10.3389/fmicb.2020.00519
PaGeD_01715	GCA_008033765.1	SAMN08915456	PRJNA449629	doi.org/10.3389/fmicb.2020.00519
PaGeD_01716	GCA_008360935.1	SAMN11338201	PRJNA530854	doi.org/10.1007/s10482-021-01516-8
PaGeD_01717	GCA_008364845.1	SAMN12662246	PRJNA563088	doi.org/10.3390/microorganisms10020378
PaGeD_01718	GCA_008638305.1	SAMN12645869	PRJNA562605	doi.org/10.1007/s00284-020-01986-5
PaGeD_01719	GCA_008638345.1	SAMN11954203	PRJNA546223	doi.org/10.1007/s00284-020-01986-5
PaGeD_01720	GCA_009772895.1	SAMN10737522	PRJNA363633	doi.org/10.1111/1462-2920.14467
PaGeD_01721	GCA_009823595.1	SAMN13678812	PRJNA597581	doi.org/10.1099/ijsem.0.004340
PaGeD_01722	GCA_009883775.1	SAMN10395144	PRJNA482764	doi.org/10.1111/1462-2920.14894
PaGeD_01723	GCA_009936135.1	SAMN13865274	PRJNA414521	doi.org/10.3389/fmicb.2020.572252
PaGeD_01724	GCA_010993675.1	SAMN13339014	PRJNA545514	doi.org/10.1038/s41598-021-86196-0
PaGeD_01725	GCA_011058205.1	SAMN14119779	PRJNA607008	doi.org/10.1007/s00284-020-02134-9
PaGeD_01726	GCA_011106835.1	SAMN13198336	PRJNA587689	doi.org/10.1128/mra.00584-20
PaGeD_01727	GCA_011611865.1	SAMN14351466	PRJNA611840	doi.org/10.1021/acs.est.0c02071
PaGeD_01728	GCA_011620045.1	SAMN13475833	PRJNA592873	doi.org/10.1128/mra.00333-20
PaGeD_01729	GCA_011620055.1	SAMN13475832	PRJNA592873	doi.org/10.1128/mra.00333-20
PaGeD_01730	GCA_011620085.1	SAMN13475831	PRJNA592873	doi.org/10.1128/mra.00333-20
PaGeD_01731	GCA_011620105.1	SAMN13475830	PRJNA592873	doi.org/10.1128/mra.00333-20
PaGeD_01732	GCA_011620125.1	SAMN13475829	PRJNA592873	doi.org/10.1128/mra.00333-20
PaGeD_01733	GCA_011620135.1	SAMN13475827	PRJNA592873	doi.org/10.1128/mra.00333-20
PaGeD_01734	GCA_011620145.1	SAMN13475828	PRJNA592873	doi.org/10.1128/mra.00333-20
PaGeD_01735	GCA_011620185.1	SAMN13475826	PRJNA592873	doi.org/10.1128/mra.00333-20
PaGeD_01736	GCA_011620205.1	SAMN13475825	PRJNA592873	doi.org/10.1128/mra.00333-20
PaGeD_01737	GCA_011620215.1	SAMN13475824	PRJNA592873	doi.org/10.1128/mra.00333-20
PaGeD_01738	GCA_011620245.1	SAMN13475822	PRJNA592873	doi.org/10.1128/mra.00333-20
PaGeD_01739	GCA_011620265.1	SAMN13475821	PRJNA592873	doi.org/10.1128/mra.00333-20
PaGeD_01740	GCA_011620275.1	SAMN13475819	PRJNA592873	doi.org/10.1128/mra.00333-20
PaGeD_01741	GCA_011620305.1	SAMN13475820	PRJNA592873	doi.org/10.1128/mra.00333-20
PaGeD_01742	GCA_011620315.1	SAMN13475823	PRJNA592873	doi.org/10.1128/mra.00333-20
PaGeD_01743	GCA_011620345.1	SAMN13475818	PRJNA592873	doi.org/10.1128/mra.00333-20
PaGeD_01744	GCA_011620365.1	SAMN13475817	PRJNA592873	doi.org/10.1128/mra.00333-20
PaGeD_01745	GCA_011620375.1	SAMN13475816	PRJNA592873	doi.org/10.1128/mra.00333-20
PaGeD_01746	GCA_011620385.1	SAMN13475815	PRJNA592873	doi.org/10.1128/mra.00333-20
PaGeD_01747	GCA_011620425.1	SAMN13475814	PRJNA592873	doi.org/10.1128/mra.00333-20
PaGeD_01748	GCA_011620445.1	SAMN13475810	PRJNA592873	doi.org/10.1128/mra.00333-20
PaGeD_01749	GCA_011620455.1	SAMN13475813	PRJNA592873	doi.org/10.1128/mra.00333-20
PaGeD_01750	GCA_011620465.1	SAMN13475811	PRJNA592873	doi.org/10.1128/mra.00333-20
PaGeD_01751	GCA_011620495.1	SAMN13475812	PRJNA592873	doi.org/10.1128/mra.00333-20
PaGeD_01752	GCA_011620505.1	SAMN13475809	PRJNA592873	doi.org/10.1128/mra.00333-20
PaGeD_01753	GCA_011620545.1	SAMN13475808	PRJNA592873	doi.org/10.1128/mra.00333-20
PaGeD_01754	GCA_011620555.1	SAMN13475807	PRJNA592873	doi.org/10.1128/mra.00333-20
PaGeD_01755	GCA_011620585.1	SAMN13475804	PRJNA592873	doi.org/10.1128/mra.00333-20
PaGeD_01756	GCA_011620595.1	SAMN13475806	PRJNA592873	doi.org/10.1128/mra.00333-20
PaGeD_01757	GCA_011620605.1	SAMN13475805	PRJNA592873	doi.org/10.1128/mra.00333-20
PaGeD_01758	GCA_011620645.1	SAMN13475801	PRJNA592873	doi.org/10.1128/mra.00333-20
PaGeD_01759	GCA_011620665.1	SAMN13475799	PRJNA592873	doi.org/10.1128/mra.00333-20
PaGeD_01760	GCA_011620685.1	SAMN13475803	PRJNA592873	doi.org/10.1128/mra.00333-20
PaGeD_01761	GCA_011620695.1	SAMN13475802	PRJNA592873	doi.org/10.1128/mra.00333-20
PaGeD_01762	GCA_011620705.1	SAMN13475800	PRJNA592873	doi.org/10.1128/mra.00333-20
PaGeD_01763	GCA_011620715.1	SAMN13475798	PRJNA592873	doi.org/10.1128/mra.00333-20
PaGeD_01764	GCA_011620765.1	SAMN13475797	PRJNA592873	doi.org/10.1128/mra.00333-20
PaGeD_01765	GCA_011620785.1	SAMN13475795	PRJNA592873	doi.org/10.1128/mra.00333-20
PaGeD_01766	GCA_011620795.1	SAMN13475794	PRJNA592873	doi.org/10.1128/mra.00333-20
PaGeD_01767	GCA_011620825.1	SAMN13475796	PRJNA592873	doi.org/10.1128/mra.00333-20
PaGeD_01768	GCA_011620845.1	SAMN13475792	PRJNA592873	doi.org/10.1128/mra.00333-20
PaGeD_01769	GCA_011620885.1	SAMN13475793	PRJNA592873	doi.org/10.1128/mra.00333-20
PaGeD_01770	GCA_011682075.1	SAMN12575755	PRJNA560332	doi.org/10.1099/ijsem.0.004618
PaGeD_01771	GCA_012911495.1	SAMN13865277	PRJNA601298	doi.org/10.1007/s00284-020-01983-8
PaGeD_01772	GCA_013116605.1	SAMN14860160	PRJNA631412	doi.org/10.1007/s00284-021-02380-5
PaGeD_01773	GCA_013177795.1	SAMN14896044	PRJNA414521	doi.org/10.3389/fmicb.2020.572252
PaGeD_01774	GCA_013177805.1	SAMN14896028	PRJNA414521	doi.org/10.3389/fmicb.2020.572252
PaGeD_01775	GCA_013177815.1	SAMN14896053	PRJNA414521	doi.org/10.3389/fmicb.2020.572252
PaGeD_01776	GCA_013177825.1	SAMN14896042	PRJNA414521	doi.org/10.3389/fmicb.2020.572252
PaGeD_01777	GCA_013177855.1	SAMN14896034	PRJNA414521	doi.org/10.3389/fmicb.2020.572252
PaGeD_01778	GCA_013177895.1	SAMN14896030	PRJNA414521	doi.org/10.3389/fmicb.2020.572252
PaGeD_01779	GCA_013177915.1	SAMN14896065	PRJNA414521	doi.org/10.3389/fmicb.2020.572252
PaGeD_01780	GCA_013177925.1	SAMN14896064	PRJNA414521	doi.org/10.3389/fmicb.2020.572252
PaGeD_01781	GCA_013177935.1	SAMN14896063	PRJNA414521	doi.org/10.3389/fmicb.2020.572252
PaGeD_01782	GCA_013177945.1	SAMN14896035	PRJNA414521	doi.org/10.3389/fmicb.2020.572252
PaGeD_01783	GCA_013177995.1	SAMN14896055	PRJNA414521	doi.org/10.3389/fmicb.2020.572252
PaGeD_01784	GCA_013178005.1	SAMN14896052	PRJNA414521	doi.org/10.3389/fmicb.2020.572252
PaGeD_01785	GCA_013178015.1	SAMN14896060	PRJNA414521	doi.org/10.3389/fmicb.2020.572252
PaGeD_01786	GCA_013178045.1	SAMN14896058	PRJNA414521	doi.org/10.3389/fmicb.2020.572252
PaGeD_01787	GCA_013178055.1	SAMN14896057	PRJNA414521	doi.org/10.3389/fmicb.2020.572252
PaGeD_01788	GCA_013178095.1	SAMN14896049	PRJNA414521	doi.org/10.3389/fmicb.2020.572252
PaGeD_01789	GCA_013178105.1	SAMN14896047	PRJNA414521	doi.org/10.3389/fmicb.2020.572252
PaGeD_01790	GCA_013178125.1	SAMN14896048	PRJNA414521	doi.org/10.3389/fmicb.2020.572252
PaGeD_01791	GCA_013178155.1	SAMN14896046	PRJNA414521	doi.org/10.3389/fmicb.2020.572252
PaGeD_01792	GCA_013178165.1	SAMN14896041	PRJNA414521	doi.org/10.3389/fmicb.2020.572252
PaGeD_01793	GCA_013178175.1	SAMN14896040	PRJNA414521	doi.org/10.3389/fmicb.2020.572252
PaGeD_01794	GCA_013178185.1	SAMN14896036	PRJNA414521	doi.org/10.3389/fmicb.2020.572252
PaGeD_01795	GCA_013178225.1	SAMN14896038	PRJNA414521	doi.org/10.3389/fmicb.2020.572252
PaGeD_01796	GCA_013178255.1	SAMN14896026	PRJNA414521	doi.org/10.3389/fmicb.2020.572252
PaGeD_01797	GCA_013178275.1	SAMN14896027	PRJNA414521	doi.org/10.3389/fmicb.2020.572252
PaGeD_01798	GCA_013178285.1	SAMN14896037	PRJNA414521	doi.org/10.3389/fmicb.2020.572252
PaGeD_01799	GCA_013178295.1	SAMN14896021	PRJNA414521	doi.org/10.3389/fmicb.2020.572252
PaGeD_01800	GCA_013178305.1	SAMN14896032	PRJNA414521	doi.org/10.3389/fmicb.2020.572252
PaGeD_01801	GCA_013178315.1	SAMN14896022	PRJNA414521	doi.org/10.3389/fmicb.2020.572252
PaGeD_01802	GCA_013178375.1	SAMN14896059	PRJNA414521	doi.org/10.3389/fmicb.2020.572252
PaGeD_01803	GCA_013178385.1	SAMN14896066	PRJNA414521	doi.org/10.3389/fmicb.2020.572252
PaGeD_01804	GCA_013178415.1	SAMN14896029	PRJNA414521	doi.org/10.3389/fmicb.2020.572252
PaGeD_01805	GCA_013309705.1	SAMN13744945	PRJNA599323	doi.org/10.1016/j.ecoenv.2020.111087
PaGeD_01806	GCA_013314715.1	SAMN14896056	PRJNA414521	doi.org/10.3389/fmicb.2020.572252
PaGeD_01807	GCA_013314735.1	SAMN14896062	PRJNA414521	doi.org/10.3389/fmicb.2020.572252
PaGeD_01808	GCA_013314755.1	SAMN14896031	PRJNA414521	doi.org/10.3389/fmicb.2020.572252
PaGeD_01809	GCA_013314775.1	SAMN14896020	PRJNA414521	doi.org/10.3389/fmicb.2020.572252
PaGeD_01810	GCA_013314795.1	SAMN14896045	PRJNA414521	doi.org/10.3389/fmicb.2020.572252
PaGeD_01811	GCA_013314815.1	SAMN14896061	PRJNA414521	doi.org/10.3389/fmicb.2020.572252
PaGeD_01812	GCA_013314835.1	SAMN14896067	PRJNA414521	doi.org/10.3389/fmicb.2020.572252
PaGeD_01813	GCA_013314855.1	SAMN14896051	PRJNA414521	doi.org/10.3389/fmicb.2020.572252
PaGeD_01814	GCA_013314865.1	SAMN14896039	PRJNA414521	doi.org/10.3389/fmicb.2020.572252
PaGeD_01815	GCA_013348845.1	SAMN14896033	PRJNA414521	doi.org/10.3389/fmicb.2020.572252
PaGeD_01816	GCA_013371465.1	SAMN15146833	PRJNA637586	Unpublished
PaGeD_01817	GCA_013371485.1	SAMN15149561	PRJNA637646	doi.org/10.1128/mra.01255-20
PaGeD_01818	GCA_013374835.1	SAMN14896024	PRJNA414521	doi.org/10.3389/fmicb.2020.572252
PaGeD_01819	GCA_013374855.1	SAMN14896023	PRJNA414521	doi.org/10.3389/fmicb.2020.572252
PaGeD_01820	GCA_013402945.1	SAMN15297292	PRJNA414521	doi.org/10.3389/fmicb.2020.572252
PaGeD_01821	GCA_013403005.1	SAMN15297293	PRJNA414521	doi.org/10.3389/fmicb.2020.572252
PaGeD_01822	GCA_013414795.1	SAMN14896054	PRJNA414521	doi.org/10.3389/fmicb.2020.572252
PaGeD_01823	GCA_013415865.1	SAMN14896050	PRJNA414521	doi.org/10.3389/fmicb.2020.572252
PaGeD_01824	GCA_013423485.1	SAMN14851918	PRJNA631096	doi.org/10.1016/j.syapm.2020.126171
PaGeD_01825	GCA_013423495.1	SAMN14852288	PRJNA631096	doi.org/10.1016/j.syapm.2020.126171
PaGeD_01826	GCA_013426185.1	SAMN14896025	PRJNA414521	doi.org/10.3389/fmicb.2020.572252
PaGeD_01827	GCA_013432195.1	SAMN15473270	PRJNA644777	doi.org/10.1128/mra.00796-20
PaGeD_01828	GCA_013540605.1	SAMN14896043	PRJNA414521	doi.org/10.3389/fmicb.2020.572252
PaGeD_01829	GCA_014236665.1	SAMN15496526	PRJNA578106	doi.org/10.1038/s41598-020-64904-6
PaGeD_01830	GCA_014236675.1	SAMN15496524	PRJNA578106	doi.org/10.1038/s41598-020-64904-6
PaGeD_01831	GCA_014236685.1	SAMN15496525	PRJNA578106	doi.org/10.1038/s41598-020-64904-6
PaGeD_01832	GCA_014236755.1	SAMN15496523	PRJNA578106	doi.org/10.1038/s41598-020-64904-6
PaGeD_01833	GCA_014357975.1	SAMN15637577	PRJNA635524	doi.org/10.1021/acs.est.0c02071
PaGeD_01834	GCA_014359265.1	SAMN15637571	PRJNA635524	doi.org/10.1021/acs.est.0c02071
PaGeD_01835	GCA_014359305.1	SAMN15637658	PRJNA635524	doi.org/10.1021/acs.est.0c02071
PaGeD_01836	GCA_014359315.1	SAMN15637660	PRJNA635524	doi.org/10.1021/acs.est.0c02071
PaGeD_01837	GCA_014359345.1	SAMN15637659	PRJNA635524	doi.org/10.1021/acs.est.0c02071
PaGeD_01838	GCA_014359355.1	SAMN15637657	PRJNA635524	doi.org/10.1021/acs.est.0c02071
PaGeD_01839	GCA_014359385.1	SAMN15637656	PRJNA635524	doi.org/10.1021/acs.est.0c02071
PaGeD_01840	GCA_014359405.1	SAMN15637655	PRJNA635524	doi.org/10.1021/acs.est.0c02071
PaGeD_01841	GCA_014359425.1	SAMN15637651	PRJNA635524	doi.org/10.1021/acs.est.0c02071
PaGeD_01842	GCA_014359455.1	SAMN15637653	PRJNA635524	doi.org/10.1021/acs.est.0c02071
PaGeD_01843	GCA_014359465.1	SAMN15637652	PRJNA635524	doi.org/10.1021/acs.est.0c02071
PaGeD_01844	GCA_014359475.1	SAMN15637650	PRJNA635524	doi.org/10.1021/acs.est.0c02071
PaGeD_01845	GCA_014359525.1	SAMN15637649	PRJNA635524	doi.org/10.1021/acs.est.0c02071
PaGeD_01846	GCA_014359545.1	SAMN15637647	PRJNA635524	doi.org/10.1021/acs.est.0c02071
PaGeD_01847	GCA_014359555.1	SAMN15637648	PRJNA635524	doi.org/10.1021/acs.est.0c02071
PaGeD_01848	GCA_014359565.1	SAMN15637645	PRJNA635524	doi.org/10.1021/acs.est.0c02071
PaGeD_01849	GCA_014359585.1	SAMN15637646	PRJNA635524	doi.org/10.1021/acs.est.0c02071
PaGeD_01850	GCA_014359625.1	SAMN15637643	PRJNA635524	doi.org/10.1021/acs.est.0c02071
PaGeD_01851	GCA_014359645.1	SAMN15637644	PRJNA635524	doi.org/10.1021/acs.est.0c02071
PaGeD_01852	GCA_014359665.1	SAMN15637641	PRJNA635524	doi.org/10.1021/acs.est.0c02071
PaGeD_01853	GCA_014359675.1	SAMN15637642	PRJNA635524	doi.org/10.1021/acs.est.0c02071
PaGeD_01854	GCA_014359685.1	SAMN15637640	PRJNA635524	doi.org/10.1021/acs.est.0c02071
PaGeD_01855	GCA_014359725.1	SAMN15637639	PRJNA635524	doi.org/10.1021/acs.est.0c02071
PaGeD_01856	GCA_014359745.1	SAMN15637638	PRJNA635524	doi.org/10.1021/acs.est.0c02071
PaGeD_01857	GCA_014359755.1	SAMN15637636	PRJNA635524	doi.org/10.1021/acs.est.0c02071
PaGeD_01858	GCA_014359765.1	SAMN15637635	PRJNA635524	doi.org/10.1021/acs.est.0c02071
PaGeD_01859	GCA_014359785.1	SAMN15637637	PRJNA635524	doi.org/10.1021/acs.est.0c02071
PaGeD_01860	GCA_014359815.1	SAMN15637634	PRJNA635524	doi.org/10.1021/acs.est.0c02071
PaGeD_01861	GCA_014359845.1	SAMN15637633	PRJNA635524	doi.org/10.1021/acs.est.0c02071
PaGeD_01862	GCA_014359855.1	SAMN15637632	PRJNA635524	doi.org/10.1021/acs.est.0c02071
PaGeD_01863	GCA_014359885.1	SAMN15637629	PRJNA635524	doi.org/10.1021/acs.est.0c02071
PaGeD_01864	GCA_014359895.1	SAMN15637630	PRJNA635524	doi.org/10.1021/acs.est.0c02071
PaGeD_01865	GCA_014359905.1	SAMN15637631	PRJNA635524	doi.org/10.1021/acs.est.0c02071
PaGeD_01866	GCA_014359945.1	SAMN15637628	PRJNA635524	doi.org/10.1021/acs.est.0c02071
PaGeD_01867	GCA_014359955.1	SAMN15637627	PRJNA635524	doi.org/10.1021/acs.est.0c02071
PaGeD_01868	GCA_014359965.1	SAMN15637626	PRJNA635524	doi.org/10.1021/acs.est.0c02071
PaGeD_01869	GCA_014360005.1	SAMN15637624	PRJNA635524	doi.org/10.1021/acs.est.0c02071
PaGeD_01870	GCA_014360015.1	SAMN15637625	PRJNA635524	doi.org/10.1021/acs.est.0c02071
PaGeD_01871	GCA_014360045.1	SAMN15637622	PRJNA635524	doi.org/10.1021/acs.est.0c02071
PaGeD_01872	GCA_014360055.1	SAMN15637623	PRJNA635524	doi.org/10.1021/acs.est.0c02071
PaGeD_01873	GCA_014360065.1	SAMN15637621	PRJNA635524	doi.org/10.1021/acs.est.0c02071
PaGeD_01874	GCA_014360105.1	SAMN15637619	PRJNA635524	doi.org/10.1021/acs.est.0c02071
PaGeD_01875	GCA_014360155.1	SAMN15637617	PRJNA635524	doi.org/10.1021/acs.est.0c02071
PaGeD_01876	GCA_014360185.1	SAMN15637616	PRJNA635524	doi.org/10.1021/acs.est.0c02071
PaGeD_01877	GCA_014360195.1	SAMN15637614	PRJNA635524	doi.org/10.1021/acs.est.0c02071
PaGeD_01878	GCA_014360205.1	SAMN15637615	PRJNA635524	doi.org/10.1021/acs.est.0c02071
PaGeD_01879	GCA_014360245.1	SAMN15637612	PRJNA635524	doi.org/10.1021/acs.est.0c02071
PaGeD_01880	GCA_014360265.1	SAMN15637613	PRJNA635524	doi.org/10.1021/acs.est.0c02071
PaGeD_01881	GCA_014360285.1	SAMN15637611	PRJNA635524	doi.org/10.1021/acs.est.0c02071
PaGeD_01882	GCA_014360295.1	SAMN15637610	PRJNA635524	doi.org/10.1021/acs.est.0c02071
PaGeD_01883	GCA_014360325.1	SAMN15637609	PRJNA635524	doi.org/10.1021/acs.est.0c02071
PaGeD_01884	GCA_014360335.1	SAMN15637608	PRJNA635524	doi.org/10.1021/acs.est.0c02071
PaGeD_01885	GCA_014360365.1	SAMN15637605	PRJNA635524	doi.org/10.1021/acs.est.0c02071
PaGeD_01886	GCA_014360375.1	SAMN15637603	PRJNA635524	doi.org/10.1021/acs.est.0c02071
PaGeD_01887	GCA_014360385.1	SAMN15637604	PRJNA635524	doi.org/10.1021/acs.est.0c02071
PaGeD_01888	GCA_014360395.1	SAMN15637602	PRJNA635524	doi.org/10.1021/acs.est.0c02071
PaGeD_01889	GCA_014360445.1	SAMN15637601	PRJNA635524	doi.org/10.1021/acs.est.0c02071
PaGeD_01890	GCA_014360465.1	SAMN15637606	PRJNA635524	doi.org/10.1021/acs.est.0c02071
PaGeD_01891	GCA_014360485.1	SAMN15637600	PRJNA635524	doi.org/10.1021/acs.est.0c02071
PaGeD_01892	GCA_014360495.1	SAMN15637607	PRJNA635524	doi.org/10.1021/acs.est.0c02071
PaGeD_01893	GCA_014360525.1	SAMN15637598	PRJNA635524	doi.org/10.1021/acs.est.0c02071
PaGeD_01894	GCA_014360565.1	SAMN15637597	PRJNA635524	doi.org/10.1021/acs.est.0c02071
PaGeD_01895	GCA_014360585.1	SAMN15637596	PRJNA635524	doi.org/10.1021/acs.est.0c02071
PaGeD_01896	GCA_014360605.1	SAMN15637594	PRJNA635524	doi.org/10.1021/acs.est.0c02071
PaGeD_01897	GCA_014360625.1	SAMN15637595	PRJNA635524	doi.org/10.1021/acs.est.0c02071
PaGeD_01898	GCA_014360645.1	SAMN15637593	PRJNA635524	doi.org/10.1021/acs.est.0c02071
PaGeD_01899	GCA_014360655.1	SAMN15637592	PRJNA635524	doi.org/10.1021/acs.est.0c02071
PaGeD_01900	GCA_014360685.1	SAMN15637591	PRJNA635524	doi.org/10.1021/acs.est.0c02071
PaGeD_01901	GCA_014360705.1	SAMN15637590	PRJNA635524	doi.org/10.1021/acs.est.0c02071
PaGeD_01902	GCA_014360715.1	SAMN15637589	PRJNA635524	doi.org/10.1021/acs.est.0c02071
PaGeD_01903	GCA_014360745.1	SAMN15637588	PRJNA635524	doi.org/10.1021/acs.est.0c02071
PaGeD_01904	GCA_014360755.1	SAMN15637587	PRJNA635524	doi.org/10.1021/acs.est.0c02071
PaGeD_01905	GCA_014360785.1	SAMN15637585	PRJNA635524	doi.org/10.1021/acs.est.0c02071
PaGeD_01906	GCA_014360805.1	SAMN15637584	PRJNA635524	doi.org/10.1021/acs.est.0c02071
PaGeD_01907	GCA_014360825.1	SAMN15637583	PRJNA635524	doi.org/10.1021/acs.est.0c02071
PaGeD_01908	GCA_014360845.1	SAMN15637581	PRJNA635524	doi.org/10.1021/acs.est.0c02071
PaGeD_01909	GCA_014360855.1	SAMN15637579	PRJNA635524	doi.org/10.1021/acs.est.0c02071
PaGeD_01910	GCA_014360885.1	SAMN15637582	PRJNA635524	doi.org/10.1021/acs.est.0c02071
PaGeD_01911	GCA_014360895.1	SAMN15637580	PRJNA635524	doi.org/10.1021/acs.est.0c02071
PaGeD_01912	GCA_014360905.1	SAMN15637586	PRJNA635524	doi.org/10.1021/acs.est.0c02071
PaGeD_01913	GCA_014360945.1	SAMN15637576	PRJNA635524	doi.org/10.1021/acs.est.0c02071
PaGeD_01914	GCA_014360965.1	SAMN15637578	PRJNA635524	doi.org/10.1021/acs.est.0c02071
PaGeD_01915	GCA_014360985.1	SAMN15637574	PRJNA635524	doi.org/10.1021/acs.est.0c02071
PaGeD_01916	GCA_014360995.1	SAMN15637575	PRJNA635524	doi.org/10.1021/acs.est.0c02071
PaGeD_01917	GCA_014361015.1	SAMN15637573	PRJNA635524	doi.org/10.1021/acs.est.0c02071
PaGeD_01918	GCA_014361045.1	SAMN15637570	PRJNA635524	doi.org/10.1021/acs.est.0c02071
PaGeD_01919	GCA_014361055.1	SAMN15637572	PRJNA635524	doi.org/10.1021/acs.est.0c02071
PaGeD_01920	GCA_014361085.1	SAMN15637569	PRJNA635524	doi.org/10.1021/acs.est.0c02071
PaGeD_01921	GCA_014361095.1	SAMN15637568	PRJNA635524	doi.org/10.1021/acs.est.0c02071
PaGeD_01922	GCA_014361105.1	SAMN15637567	PRJNA635524	doi.org/10.1021/acs.est.0c02071
PaGeD_01923	GCA_014361165.1	SAMN15637566	PRJNA635524	doi.org/10.1021/acs.est.0c02071
PaGeD_01924	GCA_014361185.1	SAMN15637565	PRJNA635524	doi.org/10.1021/acs.est.0c02071
PaGeD_01925	GCA_014361195.1	SAMN15637563	PRJNA635524	doi.org/10.1021/acs.est.0c02071
PaGeD_01926	GCA_014361205.1	SAMN15637562	PRJNA635524	doi.org/10.1021/acs.est.0c02071
PaGeD_01927	GCA_014361245.1	SAMN15637564	PRJNA635524	doi.org/10.1021/acs.est.0c02071
PaGeD_01928	GCA_014361255.1	SAMN15637561	PRJNA635524	doi.org/10.1021/acs.est.0c02071
PaGeD_01929	GCA_014361295.1	SAMN15637560	PRJNA635524	doi.org/10.1021/acs.est.0c02071
PaGeD_01930	GCA_014361305.1	SAMN15637558	PRJNA635524	doi.org/10.1021/acs.est.0c02071
PaGeD_01931	GCA_014361315.1	SAMN15637559	PRJNA635524	doi.org/10.1021/acs.est.0c02071
PaGeD_01932	GCA_014361335.1	SAMN15637557	PRJNA635524	doi.org/10.1021/acs.est.0c02071
PaGeD_01933	GCA_014361345.1	SAMN15637556	PRJNA635524	doi.org/10.1021/acs.est.0c02071
PaGeD_01934	GCA_014361405.1	SAMN15637555	PRJNA635524	doi.org/10.1021/acs.est.0c02071
PaGeD_01935	GCA_014361425.1	SAMN15637551	PRJNA635524	doi.org/10.1021/acs.est.0c02071
PaGeD_01936	GCA_014361435.1	SAMN15637554	PRJNA635524	doi.org/10.1021/acs.est.0c02071
PaGeD_01937	GCA_014361445.1	SAMN15637553	PRJNA635524	doi.org/10.1021/acs.est.0c02071
PaGeD_01938	GCA_014361455.1	SAMN15637552	PRJNA635524	doi.org/10.1021/acs.est.0c02071
PaGeD_01939	GCA_014673045.1	SAMN16123993	PRJNA663229	doi.org/10.1016/j.micres.2021.126882
PaGeD_01940	GCA_015356725.1	SAMN16387356	PRJNA667862	doi.org/10.1128/mra.01341-20
PaGeD_01941	GCA_015690345.1	SAMN16810907	PRJNA678718	doi.org/10.3390/d14110947
PaGeD_01942	GCA_015709205.1	SAMN15518728	PRJNA644413	doi.org/10.1128/AEM.01819-20
PaGeD_01943	GCA_015709215.1	SAMN15518727	PRJNA644413	doi.org/10.1128/AEM.01819-20
PaGeD_01944	GCA_015709285.1	SAMN15518726	PRJNA644413	doi.org/10.1128/AEM.01819-20
PaGeD_01945	GCA_015709315.1	SAMN15518722	PRJNA644413	doi.org/10.1128/AEM.01819-20
PaGeD_01946	GCA_015709325.1	SAMN15518724	PRJNA644413	doi.org/10.1128/AEM.01819-20
PaGeD_01947	GCA_015709365.1	SAMN15518723	PRJNA644413	doi.org/10.1128/AEM.01819-20
PaGeD_01948	GCA_015709395.1	SAMN15518720	PRJNA644413	doi.org/10.1128/AEM.01819-20
PaGeD_01949	GCA_015709405.1	SAMN15518719	PRJNA644413	doi.org/10.1128/AEM.01819-20
PaGeD_01950	GCA_015731765.1	SAMN12575754	PRJNA560330	doi.org/10.1099/ijsem.0.004618
PaGeD_01951	GCA_015978185.1	SAMN16453240	PRJNA669418	doi.org/10.1093/g3journal/jkab210
PaGeD_01952	GCA_015978205.1	SAMN16451875	PRJNA669418	doi.org/10.1093/g3journal/jkab210
PaGeD_01953	GCA_016756725.1	SAMN17274762	PRJNA691030	Unpublished
PaGeD_01954	GCA_016756745.1	SAMN17274761	PRJNA691030	Unpublished
PaGeD_01955	GCA_016756815.1	SAMN17274760	PRJNA691030	Unpublished
PaGeD_01956	GCA_016906305.1	SAMN16453395	PRJNA669433	doi.org/10.1016/j.margen.2021.100875
PaGeD_01957	GCA_016925655.1	SAMN16125023	PRJNA663285	doi.org/10.1128/mra.00216-21
PaGeD_01958	GCA_017301615.1	SAMN15502970	PRJNA645406	doi.org/10.1016/j.syapm.2020.126154
PaGeD_01959	GCA_018066705.1	SAMN18649355	PRJNA720409	Unpublished
PaGeD_01960	GCA_018066715.1	SAMN18558030	PRJNA686385	doi.org/10.1128/AEM.00800-21
PaGeD_01961	GCA_018066765.1	SAMN18558028	PRJNA686385	doi.org/10.1128/AEM.00800-21
PaGeD_01962	GCA_018066785.1	SAMN18558038	PRJNA686385	doi.org/10.1128/AEM.00800-21
PaGeD_01963	GCA_018066805.1	SAMN18558019	PRJNA686385	doi.org/10.1128/AEM.00800-21
PaGeD_01964	GCA_018066825.1	SAMN18558013	PRJNA686385	doi.org/10.1128/AEM.00800-21
PaGeD_01965	GCA_018066845.1	SAMN18558041	PRJNA686385	doi.org/10.1128/AEM.00800-21
PaGeD_01966	GCA_018066865.1	SAMN18558026	PRJNA686385	doi.org/10.1128/AEM.00800-21
PaGeD_01967	GCA_018066875.1	SAMN18558043	PRJNA686385	doi.org/10.1128/AEM.00800-21
PaGeD_01968	GCA_018066905.1	SAMN18558018	PRJNA686385	doi.org/10.1128/AEM.00800-21
PaGeD_01969	GCA_018066915.1	SAMN18558035	PRJNA686385	doi.org/10.1128/AEM.00800-21
PaGeD_01970	GCA_018066935.1	SAMN18558033	PRJNA686385	doi.org/10.1128/AEM.00800-21
PaGeD_01971	GCA_018066965.1	SAMN18558046	PRJNA686385	doi.org/10.1128/AEM.00800-21
PaGeD_01972	GCA_018066985.1	SAMN18558021	PRJNA686385	doi.org/10.1128/AEM.00800-21
PaGeD_01973	GCA_018066995.1	SAMN18558023	PRJNA686385	doi.org/10.1128/AEM.00800-21
PaGeD_01974	GCA_018067025.1	SAMN18558037	PRJNA686385	doi.org/10.1128/AEM.00800-21
PaGeD_01975	GCA_018067045.1	SAMN18558011	PRJNA686385	doi.org/10.1128/AEM.00800-21
PaGeD_01976	GCA_018067055.1	SAMN18558044	PRJNA686385	doi.org/10.1128/AEM.00800-21
PaGeD_01977	GCA_018067085.1	SAMN18558042	PRJNA686385	doi.org/10.1128/AEM.00800-21
PaGeD_01978	GCA_018067105.1	SAMN18558032	PRJNA686385	doi.org/10.1128/AEM.00800-21
PaGeD_01979	GCA_018067115.1	SAMN18558014	PRJNA686385	doi.org/10.1128/AEM.00800-21
PaGeD_01980	GCA_018067145.1	SAMN18558016	PRJNA686385	doi.org/10.1128/AEM.00800-21
PaGeD_01981	GCA_018067155.1	SAMN18558010	PRJNA686385	doi.org/10.1128/AEM.00800-21
PaGeD_01982	GCA_018067185.1	SAMN18558036	PRJNA686385	doi.org/10.1128/AEM.00800-21
PaGeD_01983	GCA_018067195.1	SAMN18558045	PRJNA686385	doi.org/10.1128/AEM.00800-21
PaGeD_01984	GCA_018067225.1	SAMN18558025	PRJNA686385	doi.org/10.1128/AEM.00800-21
PaGeD_01985	GCA_018067245.1	SAMN18558039	PRJNA686385	doi.org/10.1128/AEM.00800-21
PaGeD_01986	GCA_018067265.1	SAMN18558015	PRJNA686385	doi.org/10.1128/AEM.00800-21
PaGeD_01987	GCA_018067285.1	SAMN18558029	PRJNA686385	doi.org/10.1128/AEM.00800-21
PaGeD_01988	GCA_018067295.1	SAMN18558012	PRJNA686385	doi.org/10.1128/AEM.00800-21
PaGeD_01989	GCA_018067325.1	SAMN18558020	PRJNA686385	doi.org/10.1128/AEM.00800-21
PaGeD_01990	GCA_018067345.1	SAMN18558017	PRJNA686385	doi.org/10.1128/AEM.00800-21
PaGeD_01991	GCA_018069425.1	SAMN18558024	PRJNA686385	doi.org/10.1128/AEM.00800-21
PaGeD_01992	GCA_018069465.1	SAMN18558027	PRJNA686385	doi.org/10.1128/AEM.00800-21
PaGeD_01993	GCA_018069475.1	SAMN18558022	PRJNA686385	doi.org/10.1128/AEM.00800-21
PaGeD_01994	GCA_018069485.1	SAMN18558040	PRJNA686385	doi.org/10.1128/AEM.00800-21
PaGeD_01995	GCA_018069525.1	SAMN18558031	PRJNA686385	doi.org/10.1128/AEM.00800-21
PaGeD_01996	GCA_018069545.1	SAMN18558034	PRJNA686385	doi.org/10.1128/AEM.00800-21
PaGeD_01997	GCA_018132775.1	SAMN18738553	PRJNA721783	doi.org/10.1016/j.bbrc.2021.10.069
PaGeD_01998	GCA_018138125.1	SAMN18740301	PRJNA721848	doi.org/10.1016/j.btre.2021.e00678
[truncated: 1,336 more rows]

## Sheet: Table S2
Table S2. Habitat and isolation source categories
hab_id	Habitat name	iso_id	Isolation source name
hab_001	Oil field	iso_001	Oil reservoir
hab_001	Oil field	iso_002	Oil field
hab_001	Oil field	iso_003	Oil reservoir offshore
hab_001	Oil field	iso_010	Oil refinery
hab_001	Oil field	iso_021	Crude oil
hab_001	Oil field	iso_024	Formation water
hab_001	Oil field	iso_035	Produced water
hab_001	Oil field	iso_036	Injection water
hab_001	Oil field	iso_039	Water-oil
hab_002	Engineered	iso_004	Activated Sludge, Bioreactor
hab_002	Engineered	iso_009	Lab experiment
hab_002	Engineered	iso_014	Fracturing fluids
hab_002	Engineered	iso_019	MIC
hab_002	Engineered	iso_020	Tailing pond
hab_002	Engineered	iso_022	Machinery Facilities
hab_002	Engineered	iso_023	Wastewater
hab_002	Engineered	iso_040	MIC-biofilm
hab_003	Aquatic	iso_005	Oil polluted sediment
hab_003	Aquatic	iso_025	Water
hab_003	Aquatic	iso_026	Hot springs
hab_003	Aquatic	iso_029	Groundwater
hab_003	Aquatic	iso_033	Oil polluted mangrove
hab_003	Aquatic	iso_037	Oil polluted water
hab_003	Aquatic	iso_038	Sediment
hab_004	Not reported	iso_006	Not reported
hab_004	Not reported	iso_049	gas seeps
hab_005	Terrestrial	iso_005	Oil polluted sediment
hab_005	Terrestrial	iso_007	Oil polluted soil
hab_005	Terrestrial	iso_011	Bioremediation
hab_005	Terrestrial	iso_012	Soil
hab_005	Terrestrial	iso_032	Tar
hab_005	Terrestrial	iso_043	Vulcano
hab_005	Terrestrial	iso_045	Biofuel polluted soil
hab_006	Host-associated	iso_008	Host-associated
hab_007	Marine	iso_005	Oil polluted sediment
hab_007	Marine	iso_013	Oil spill offshore
hab_007	Marine	iso_015	Sea water
hab_007	Marine	iso_016	Hydrothermal vent sediments
hab_007	Marine	iso_018	Oil polluted sea water
hab_007	Marine	iso_028	Deep sea sediments seepage
hab_007	Marine	iso_031	Deep sea water
hab_007	Marine	iso_034	Marine sediment
hab_007	Marine	iso_038	Sediment
hab_007	Marine	iso_046	Unpolluted samples
hab_008	Microcosms	iso_017	Sea water microcosms
hab_008	Microcosms	iso_027	Crude oil microcosms
hab_008	Microcosms	iso_030	Microcosms
hab_008	Microcosms	iso_041	Sediment microcosms
hab_008	Microcosms	iso_042	Soil enriched microcosms
hab_008	Microcosms	iso_044	in-situ microcosms
hab_008	Microcosms	iso_047	Deep sea sediment microcosms
hab_008	Microcosms	iso_048	Sediment enriched microcosms

## Sheet: Table S3
Table S3. Hydrocarbon Degradation Gene Dataset
Pathway	KO	Gene name
Toluene degradation, toluene => benzoate	K15760	tmoA, tbuA1, touA; toluene monooxygenase system protein A
Toluene degradation, toluene => benzoate	K15761	tmoB, tbuU, touB; toluene monooxygenase system protein B
Toluene degradation, toluene => benzoate	K15762	tmoC, tbuB, touC; toluene monooxygenase system ferredoxin subunit
Toluene degradation, toluene => benzoate	K15763	tmoD, tbuV, touD; toluene monooxygenase system protein D
Toluene degradation, toluene => benzoate	K15764	tmoE, tbuA2, touE; toluene monooxygenase system protein E
Toluene degradation, toluene => benzoate	K15765	tmoF, tbuC, touF; toluene monooxygenase electron transfer component
Toluene degradation, toluene => benzoate	K00141	xylC; benzaldehyde dehydrogenase (NAD)
Xylene degrdation, xylene => methylbenzoate	K15757	xylM; xylene monooxygenase subunit XylM
Xylene degrdation, xylene => methylbenzoate	K15758	xylA; xylene monooxygenase electron transfer component
Xylene degrdation, xylene => methylbenzoate	K00141	xylC; benzaldehyde dehydrogenase (NAD)
Cymene degradation, p-cymene => p-cumate	K10616	cymAa; p-cymene monooxygenase
Cymene degradation, p-cymene => p-cumate	K18293	cymAb; p-cymene monooxygenase electron transfer component
Cymene degradation, p-cymene => p-cumate	K10617	cymB; p-cumic alcohol dehydrogenase
Cymene degradation, p-cymene => p-cumate	K10618	cymC; p-cumic aldehyde dehydrogenase
Benzene/Toluene degradation, benzene => catechol/toluene => 3-methylcatechol	K03268	todC1, bedC1, tcbAa; benzene/toluene/chlorobenzene dioxygenase subunit alpha
Benzene/Toluene degradation, benzene => catechol/toluene => 3-methylcatechol	K16268	todC2, bedC2, tcbAb; benzene/toluene/chlorobenzene dioxygenase subunit beta
Benzene/Toluene degradation, benzene => catechol/toluene => 3-methylcatechol	K18089	todB, tcbAc; benzene/toluene/chlorobenzene dioxygenase ferredoxin component
Benzene/Toluene degradation, benzene => catechol/toluene => 3-methylcatechol	K18090	todA, tcbAd; benzene/toluene/chlorobenzene dioxygenase ferredoxin reductase component
Benzene/Toluene degradation, benzene => catechol/toluene => 3-methylcatechol	K16269	todD, tcbB; cis-1,2-dihydrobenzene-1,2-diol dehydrogenase
Benzene degradation, benzene => catechol	K16249	dmpK, poxA; phenol hydroxylase P0 protein
Benzene degradation, benzene => catechol	K16243	dmpL, poxC; Phenol hydroxylase P1 protein
Benzene degradation, benzene => catechol	K16244	dmpM, poxB; phenol hydroxylase P2 protein
Benzene degradation, benzene => catechol	K16242	dmpN, poxD; phenol hydroxylase P3 protein
Benzene degradation, benzene => catechol	K16245	dmpO, poxE; phenol hydroxylase P4 protein
Benzene degradation, benzene => catechol	K16246	dmpP, poxF; phenol hydroxylase P5 protein
Benzoate degradation, benzoate => catechol / methylbenzoate => methlycatechol	K05549	benA-xylX; benzoate/toluate 1,2-dioxygenase subunit alpha
Benzoate degradation, benzoate => catechol / methylbenzoate => methlycatechol	K05550	benB-xylY; benzoate/toluate 1,2-dioxygenase subunit beta
Benzoate degradation, benzoate => catechol / methylbenzoate => methlycatechol	K05784	benC-xylZ; benzoate/toluate 1,2-dioxygenase reductase component
Benzoate degradation, benzoate => catechol / methylbenzoate => methlycatechol	K05783	benD-xylL; dihydroxycyclohexadiene carboxylate dehydrogenase
Catechol orto-cleavage, catechol => 3-oxoadipate	K03381	catA; catechol 1,2-dioxygenase
Catechol orto-cleavage, catechol => 3-oxoadipate	K01856	catB; muconate cycloisomerase
Catechol orto-cleavage, catechol => 3-oxoadipate	K03464	catC; muconolactone D-isomerase
Catechol orto-cleavage, catechol => 3-oxoadipate	K01055	pcaD; 3-oxoadipate enol-lactonase
Catechol orto-cleavage, catechol => 3-oxoadipate	K14727	pcaL; 3-oxoadipate enol-lactonase / 4-carboxymuconolactone decarboxylase
Catechol meta-cleavage, catechol => acetyl-CoA/4-methylcatechol => propanoyl-CoA	K00446	dmpB, xylE; catechol 2,3-dioxygenase
Catechol meta-cleavage, catechol => acetyl-CoA/4-methylcatechol => propanoyl-CoA	K07104	catE; catechol 2,3-dioxygenase
Catechol meta-cleavage, catechol => acetyl-CoA/4-methylcatechol => propanoyl-CoA	K10217	dmpC, xylG, praB; aminomuconate-semialdehyde/2-hydroxymuconate-6-semialdehyde dehydrogenase
Catechol meta-cleavage, catechol => acetyl-CoA/4-methylcatechol => propanoyl-CoA	K01821	praC, xylH; 4-oxalocrotonate tautomerase
Catechol meta-cleavage, catechol => acetyl-CoA/4-methylcatechol => propanoyl-CoA	K01617	dmpH, xylI, nahK; 2-oxo-3-hexenedioate decarboxylase
Catechol meta-cleavage, catechol => acetyl-CoA/4-methylcatechol => propanoyl-CoA	K10216	dmpD, xylF; 2-hydroxymuconate-semialdehyde hydrolase
Catechol meta-cleavage, catechol => acetyl-CoA/4-methylcatechol => propanoyl-CoA	K18364	bphH, xylJ, tesE; 2-oxopent-4-enoate/cis-2-oxohex-4-enoate hydratase
Catechol meta-cleavage, catechol => acetyl-CoA/4-methylcatechol => propanoyl-CoA	K02554	mhpD; 2-keto-4-pentenoate hydratase
Catechol meta-cleavage, catechol => acetyl-CoA/4-methylcatechol => propanoyl-CoA	K18365	bphI, xylK, nahM, tesG; 4-hydroxy-2-oxovalerate/4-hydroxy-2-oxohexanoate aldolase
Catechol meta-cleavage, catechol => acetyl-CoA/4-methylcatechol => propanoyl-CoA	K01666	mhpE; 4-hydroxy 2-oxovalerate aldolase
Cumate degradation, p-cumate => 2-oxopent-4-enoate + 2-methylproponate	K10619	cmtAb; p-cumate 2,3-dioxygenase subunit alpha
Cumate degradation, p-cumate => 2-oxopent-4-enoate + 2-methylproponate	K16303	cmtAc; p-cumate 2,3-dioxygenase subunit beta
Cumate degradation, p-cumate => 2-oxopent-4-enoate + 2-methylproponate	K18227	cmtAa; p-cumate 2,3-dioxygenase ferredoxin reductase component
Cumate degradation, p-cumate => 2-oxopent-4-enoate + 2-methylproponate	K10620	cmtB; 2,3-dihydroxy-2,3-dihydro-p-cumate dehydrogenase
Cumate degradation, p-cumate => 2-oxopent-4-enoate + 2-methylproponate	K10621	cmtC, dhbA; 2,3-dihydroxy-p-cumate/2,3-dihydroxybenzoate 3,4-dioxygenase
Cumate degradation, p-cumate => 2-oxopent-4-enoate + 2-methylproponate	K10622	cmtD, dhbB; HCOMODA/2-hydroxy-3-carboxy-muconic semialdehyde decarboxylase
Cumate degradation, p-cumate => 2-oxopent-4-enoate + 2-methylproponate	K10623	cmtE; HOMODA hydrolase
Biphenyl degradation, biphenyl => 2-oxopent-4-enoate + benzoate	K08689	bphAa, bphA1, bphA; biphenyl 2,3-dioxygenase subunit alpha
Biphenyl degradation, biphenyl => 2-oxopent-4-enoate + benzoate	K15750	bphAb, bphA2, bphE; biphenyl 2,3-dioxygenase subunit beta
Biphenyl degradation, biphenyl => 2-oxopent-4-enoate + benzoate	K18087	bphAc, bphA3, bphF; biphenyl 2,3-dioxygenase ferredoxin component
Biphenyl degradation, biphenyl => 2-oxopent-4-enoate + benzoate	K18088	bphAd, bphA4, bphG; biphenyl 2,3-dioxygenase ferredoxin reductase component
Biphenyl degradation, biphenyl => 2-oxopent-4-enoate + benzoate	K08690	bphB; cis-2,3-dihydrobiphenyl-2,3-diol dehydrogenase
Biphenyl degradation, biphenyl => 2-oxopent-4-enoate + benzoate	K00462	bphC; biphenyl-2,3-diol 1,2-dioxygenase
Biphenyl degradation, biphenyl => 2-oxopent-4-enoate + benzoate	K10222	bphD; 2,6-dioxo-6-phenylhexa-3-enoate hydrolase
Toluene degradation, anaerobic, toluene => benzoyl-CoA	K07540	E4.1.99.11; benzylsuccinate synthase
Toluene degradation, anaerobic, toluene => benzoyl-CoA	K07543	bbsE; benzylsuccinate CoA-transferase BbsE subunit
Toluene degradation, anaerobic, toluene => benzoyl-CoA	K07544	bbsF; benzylsuccinate CoA-transferase BbsF subunit
Toluene degradation, anaerobic, toluene => benzoyl-CoA	K07545	bbsG; (R)-benzylsuccinyl-CoA dehydrogenase
Toluene degradation, anaerobic, toluene => benzoyl-CoA	K07546	bbsH; E-phenylitaconyl-CoA hydratase
Toluene degradation, anaerobic, toluene => benzoyl-CoA	K07547	bbsC; 2-[hydroxy(phenyl)methyl]-succinyl-CoA dehydrogenase BbsC subunit
Toluene degradation, anaerobic, toluene => benzoyl-CoA	K07548	bbsD; 2-[hydroxy(phenyl)methyl]-succinyl-CoA dehydrogenase BbsD subunit
Toluene degradation, anaerobic, toluene => benzoyl-CoA	K07549	bbsA; benzoylsuccinyl-CoA thiolase BbsA subunit
Toluene degradation, anaerobic, toluene => benzoyl-CoA	K07550	bbsB; benzoylsuccinyl-CoA thiolase BbsB subunit
Benzoyl-CoA degradation, benzoyl-CoA => 3-hydroxypimeloyl-CoA	K04112	bcrC, badD; benzoyl-CoA reductase subunit C
Benzoyl-CoA degradation, benzoyl-CoA => 3-hydroxypimeloyl-CoA	K04113	bcrB, badE; benzoyl-CoA reductase subunit B
Benzoyl-CoA degradation, benzoyl-CoA => 3-hydroxypimeloyl-CoA	K04114	bcrA, badF; benzoyl-CoA reductase subunit A
Benzoyl-CoA degradation, benzoyl-CoA => 3-hydroxypimeloyl-CoA	K04115	bcrD, badG; benzoyl-CoA reductase subunit D
Benzoyl-CoA degradation, benzoyl-CoA => 3-hydroxypimeloyl-CoA	K19515	bamB; benzoyl-CoA reductase subunit BamB
Benzoyl-CoA degradation, benzoyl-CoA => 3-hydroxypimeloyl-CoA	K19516	bamC; benzoyl-CoA reductase subunit BamC
Benzoyl-CoA degradation, benzoyl-CoA => 3-hydroxypimeloyl-CoA	K07537	dch; cyclohexa-1,5-dienecarbonyl-CoA hydratase
Benzoyl-CoA degradation, benzoyl-CoA => 3-hydroxypimeloyl-CoA	K07538	had; 6-hydroxycyclohex-1-ene-1-carbonyl-CoA dehydrogenase
Benzoyl-CoA degradation, benzoyl-CoA => 3-hydroxypimeloyl-CoA	K07539	oah; 6-oxocyclohex-1-ene-carbonyl-CoA hydrolase
Benzoate degradation, cyclohexanecarboxylic acid => pimeloyl-CoA	K04116	aliA; cyclohexanecarboxylate-CoA ligase
Benzoate degradation, cyclohexanecarboxylic acid => pimeloyl-CoA	K04117	aliB; cyclohexanecarboxyl-CoA dehydrogenase
Benzoate degradation, cyclohexanecarboxylic acid => pimeloyl-CoA	K07534	badK; cyclohex-1-ene-1-carboxyl-CoA hydratase
Benzoate degradation, cyclohexanecarboxylic acid => pimeloyl-CoA	K07535	badH; 2-hydroxycyclohexanecarboxyl-CoA dehydrogenase
Benzoate degradation, cyclohexanecarboxylic acid => pimeloyl-CoA	K07536	badI; 2-ketocyclohexanecarboxyl-CoA hydrolase
Naphthalene degradation, naphthalene => salicylate	K14579	nahAc, ndoB, nbzAc, dntAc; naphthalene 1,2-dioxygenase subunit alpha
Naphthalene degradation, naphthalene => salicylate	K14580	nahAd, ndoC, nbzAd, dntAd; naphthalene 1,2-dioxygenase subunit beta
Naphthalene degradation, naphthalene => salicylate	K14578	nahAb, nagAb, ndoA, nbzAb, dntAb; naphthalene 1,2-dioxygenase ferredoxin component
Naphthalene degradation, naphthalene => salicylate	K14581	nahAa, nagAa, ndoR, nbzAa, dntAa; naphthalene 1,2-dioxygenase ferredoxin reductase component
Naphthalene degradation, naphthalene => salicylate	K14582	nahB, doxE; cis-1,2-dihydro-1,2-dihydroxynaphthalene/dibenzothiophene dihydrodiol dehydrogenase
Naphthalene degradation, naphthalene => salicylate	K14583	nahC; 1,2-dihydroxynaphthalene dioxygenase
Naphthalene degradation, naphthalene => salicylate	K14584	nahD; 2-hydroxychromene-2-carboxylate isomerase
Naphthalene degradation, naphthalene => salicylate	K14585	nahE; trans-o-hydroxybenzylidenepyruvate hydratase-aldolase
Naphthalene degradation, naphthalene => salicylate	K00152	nahF; salicylaldehyde dehydrogenase
Terephthalate degradation, terephthalate => 3,4-dihydroxybenzoate	K18074	tphA2; terephthalate 1,2-dioxygenase oxygenase component alpha subunit
Terephthalate degradation, terephthalate => 3,4-dihydroxybenzoate	K18075	tphA3; terephthalate 1,2-dioxygenase oxygenase component beta subunit
Terephthalate degradation, terephthalate => 3,4-dihydroxybenzoate	K18077	tphA1; terephthalate 1,2-dioxygenase reductase component
Terephthalate degradation, terephthalate => 3,4-dihydroxybenzoate	K18076	tphB; 1,2-dihydroxy-3,5-cyclohexadiene-1,4-dicarboxylate dehydrogenase
Phthalate degradation, phthalate => protocatechuate	K18068	pht3; phthalate 4,5-dioxygenase
Phthalate degradation, phthalate => protocatechuate	K18069	pht2; phthalate 4,5-dioxygenase reductase component
Phthalate degradation, phthalate => protocatechuate	K18067	pht4; phthalate 4,5-cis-dihydrodiol dehydrogenase
Phthalate degradation, phthalate => protocatechuate	K04102	pht5; 4,5-dihydroxyphthalate decarboxylase
Phthalate degradation, phthalate => protocatechuate	K18251	phtAa; phthalate 3,4-dioxygenase subunit alpha
Phthalate degradation, phthalate => protocatechuate	K18252	phtAb; phthalate 3,4-dioxygenase subunit beta
Phthalate degradation, phthalate => protocatechuate	K18253	phtAc; phthalate 3,4-dioxygenase ferredoxin component
Phthalate degradation, phthalate => protocatechuate	K18254	phtAd; phthalate 3,4-dioxygenase ferredoxin reductase component
Phthalate degradation, phthalate => protocatechuate	K18255	phtB; phthalate 3,4-cis-dihydrodiol dehydrogenase
Phthalate degradation, phthalate => protocatechuate	K18256	phtC; 3,4-dihydroxyphthalate decarboxylase
Ethylbenzene degradation, ethylbenzene => 3-ethlycatechol	K14748	etbAa; ethylbenzene dioxygenase subunit alpha
Ethylbenzene degradation, ethylbenzene => 3-ethlycatechol	K14749	etbAb; ethylbenzene dioxygenase subunit beta
Ethylbenzene degradation, ethylbenzene => 3-ethlycatechol	K14750	etbAc; ethylbenzene dioxygenase ferredoxin component
Phenanthrene degradation, phenanthrene => 1-hydroxy-2-naphtoate	K11943	nidA; PAH dioxygenase large subunit
Phenanthrene degradation, phenanthrene => 1-hydroxy-2-naphtoate	K11944	nidB; PAH dioxygenase small subunit
Phenanthrene degradation, phenanthrene => 1-hydroxy-2-naphtoate	K18257	phdE; cis-3,4-dihydrophenanthrene-3,4-diol dehydrogenase
Phenanthrene degradation, phenanthrene => 1-hydroxy-2-naphtoate	K11945	phdF; extradiol dioxygenase
Phenanthrene degradation, phenanthrene => 1-hydroxy-2-naphtoate	K11946	phdG; hydratase-aldolase
Phenanthrene degradation, phenanthrene => 1-hydroxy-2-naphtoate	K11947	nidD; aldehyde dehydrogenase
2-Methylnaphthalene degradation, 2-methylnaphthalene => 2-naphthoyl-CoA	K01670	nmsA; naphthyl-2-methylsuccinate synthase alpha subunit
2-Methylnaphthalene degradation, 2-methylnaphthalene => 2-naphthoyl-CoA	K15567	nmsB; naphthyl-2-methylsuccinate synthase beta subunit
2-Methylnaphthalene degradation, 2-methylnaphthalene => 2-naphthoyl-CoA	K15568	nmsC; naphthyl-2-methylsuccinate synthase gamma subunit
2-Methylnaphthalene degradation, 2-methylnaphthalene => 2-naphthoyl-CoA	K15569	bnsE; naphthyl-2-methylsuccinate CoA transferase subunit
2-Methylnaphthalene degradation, 2-methylnaphthalene => 2-naphthoyl-CoA	K15570	bnsF; naphthyl-2-methylsuccinate CoA transferase subunit
2-Methylnaphthalene degradation, 2-methylnaphthalene => 2-naphthoyl-CoA	K15571	bnsG; naphthyl-2-methylsuccinyl-CoA dehydrogenase
2-Methylnaphthalene degradation, 2-methylnaphthalene => 2-naphthoyl-CoA	K15572	bnsH; naphthyl-2-hydroxymethylsuccinyl-CoA hydratase
2-Methylnaphthalene degradation, 2-methylnaphthalene => 2-naphthoyl-CoA	K15573	bnsC; naphthyl-2-hydroxymethylsuccinyl-CoA dehydrogenase BnsC subunit
2-Methylnaphthalene degradation, 2-methylnaphthalene => 2-naphthoyl-CoA	K19958	bnsD; naphthyl-2-hydroxymethylsuccinyl-CoA dehydrogenase BnsD subunit
2-Methylnaphthalene degradation, 2-methylnaphthalene => 2-naphthoyl-CoA	K15574	bnsA; naphthyl-2-oxomethyl-succinyl-CoA thiolase subunit
2-Methylnaphthalene degradation, 2-methylnaphthalene => 2-naphthoyl-CoA	K14586	nmoAB; 2-naphthoate monooxygenase
2-Methylnaphthalene degradation, 2-methylnaphthalene => 2-naphthoyl-CoA	K15575	bnsB; naphthyl-2-oxomethyl-succinyl-CoA thiolase subunit
alkane degradation	K00496	alkB1_2, alkM; alkane 1-monooxygenase
alkane degradation	K20938	ladA; long-chain alkane monooxygenase
alkane degradation	K10944	pmoA-amoA; methane/ammonia monooxygenase subunit A
alkane degradation	K10945	pmoB-amoB; methane/ammonia monooxygenase subunit B
alkane degradation	K10946	pmoC-amoC; methane/ammonia monooxygenase subunit C
styrene degradation	K14481	styA; styrene monooxygenase
styrene degradation	K14482	styB; styrene monooxygenase reductase component
Phenol degradation, phenol => benzoyl-CoA	K01612	bsdC; vanillate/4-hydroxybenzoate decarboxylase subunit C
Phenol degradation, phenol => benzoyl-CoA	K21759	bsdD; vanillate/4-hydroxybenzoate decarboxylase subunit D
Phenol degradation, phenol => benzoyl-CoA	K04105	hbaA; 4-hydroxybenzoate-CoA ligase
Phenol degradation, phenol => benzoyl-CoA	K04107	hcrC, hbaB; 4-hydroxybenzoyl-CoA reductase subunit gamma
Phenol degradation, phenol => benzoyl-CoA	K04108	hcrA, hbaC; 4-hydroxybenzoyl-CoA reductase subunit alpha
Phenol degradation, phenol => benzoyl-CoA	K04109	hcrB, hbaD; 4-hydroxybenzoyl-CoA reductase subunit beta
Ethylbenzene degradation, anaerobic, ethylbenzene => benzoyl-CoA	K10700	ebdA; ethylbenzene hydroxylase subunit alpha
Ethylbenzene degradation, anaerobic, ethylbenzene => benzoyl-CoA	K17048	ebdB; ethylbenzene hydroxylase subunit beta
Ethylbenzene degradation, anaerobic, ethylbenzene => benzoyl-CoA	K17049	ebdC; ethylbenzene hydroxylase subunit gamma
Ethylbenzene degradation, anaerobic, ethylbenzene => benzoyl-CoA	K14746	ped; (S)-1-phenylethanol dehydrogenase
Ethylbenzene degradation, anaerobic, ethylbenzene => benzoyl-CoA	K10701	apc; acetophenone carboxylase
Ethylbenzene degradation, anaerobic, ethylbenzene => benzoyl-CoA	K14747	bal; benzoylacetate-CoA ligase

## Sheet: tab_total
Essa tabela não vai no trabalho
Genome	Completeness	Contamination	Length	Numero_contigs	N50	GC	16S_rRNA	16S rRNA copies	23S rRNA copies	5S rRNA copies	Quality	Type	Kingdom	Phylum	Class	Order	Family	Genus	Species	Cluster_Number	Representative_genome
2501533205	100	0.62	2576359	3	2567436	43.9	Yes	5	5	5	High-Quality	Isolate	Bacteria	Synergistota	Synergistia	Synergistales	Dethiosulfovibrionaceae	Dethiosulfovibrio	Dethiosulfovibrio peptidovorans	2497	Yes
2503508009	97.98	1.48	3135972	1	3135972	38.9	Yes	3	3	3	High-Quality	Isolate	Bacteria	Bacillota_A	Clostridia	Mahellales	Mahellaceae	Mahella	Mahella australiensis	998	Yes
2505119043	100	0	1999646	2	1967774	42.2	Yes	3	3	3	High-Quality	Isolate	Bacteria	Synergistota	Synergistia	Synergistales	Thermovirgaceae	Thermovirga	Thermovirga lienii	655	Yes
2506520025	98.98	0.13	3307499	133	79798	38.5	Yes	1	1	1	High-Quality	Isolate	Bacteria	Bacillota_B	Moorellia	Moorellales	Moorellaceae	Moorella	Moorella stamsii	1229	Yes
2516653025	99.82	0.61	5866715	122	110945	36.3	Yes	1	1	2	High-Quality	Isolate	Bacteria	Pseudomonadota	Gammaproteobacteria	Pseudomonadales	Pseudomonadaceae	Pseudomonas_E	Pseudomonas_E asiatica	1622	No
2516653026	99.87	0.61	5817558	117	109525	36.3	Yes	1	1	2	High-Quality	Isolate	Bacteria	Pseudomonadota	Gammaproteobacteria	Pseudomonadales	Pseudomonadaceae	Pseudomonas_E	Pseudomonas_E asiatica	1622	Yes
2516653027	99.08	0	5164718	63	344568	33.7	Yes	1	1	1	High-Quality	Isolate	Bacteria	Actinomycetota	Actinomycetia	Mycobacteriales	Mycobacteriaceae	Rhodococcus	Rhodococcus pyridinivorans	1478	Yes
2516653088	100	0.03	1523554	32	173775	42	Yes	1	1	1	High-Quality	Isolate	Archaea	Halobacteriota	Methanosarcinia_A	Methanosarcinales_A	Methermicoccaceae	Methermicoccus	Methermicoccus shengliensis	2014	No
2517572015	100	0	1749971	1	1749971	42.3	Yes	1	1	1	High-Quality	Isolate	Bacteria	Thermotogota	Thermotogae	Thermotogales	Thermotogaceae	Thermotoga	Thermotoga petrophila	713	Yes
2517572020	100	0	1739444	20	136685	42.3	Yes	1	1	1	High-Quality	Isolate	Bacteria	Thermotogota	Thermotogae	Thermotogales	Thermotogaceae	Thermotoga	Thermotoga petrophila	713	No
2517572083	100	0	1736569	19	243875	42.3	Yes	1	1	1	High-Quality	Isolate	Bacteria	Thermotogota	Thermotogae	Thermotogales	Thermotogaceae	Thermotoga	Thermotoga petrophila	713	No
2518285546	98.71	1.29	3959719	521	24168	39.9	Yes	4	2	3	High-Quality	Isolate	Bacteria	Desulfobacterota_F	Desulfuromonadia	Desulfuromonadales	Syntrophotaleaceae	Syntrophotalea	Genus_Syntrophotalea	1325	Yes
2518285547	98.71	1.61	4005806	423	22581	39.8	Yes	1	1	1	High-Quality	Isolate	Bacteria	Desulfobacterota_F	Desulfuromonadia	Desulfuromonadales	Syntrophotaleaceae	Syntrophotalea	Genus_Syntrophotalea	1325	No
2519899679	99.3	0.89	3962581	49	161256	36.4	Yes	4	2	2	High-Quality	Isolate	Bacteria	Pseudomonadota	Gammaproteobacteria	Nitrococcales	Nitrococcaceae	Arhodomonas	Arhodomonas aquaeolei	859	Yes
2522572039	99.94	3.58	5722743	322	81720	36.1	Yes	1	1	1	High-Quality	Isolate	Bacteria	Pseudomonadota	Gammaproteobacteria	Methylococcales	Methylomonadaceae	Methylicorpusculum	Methylicorpusculum oleiharenae	1332	Yes
2523533522	100	0.2	3707427	20	399957	39.1	Yes	2	2	3	High-Quality	Isolate	Bacteria	Desulfobacterota	Desulfovibrionia	Desulfovibrionales	Desulfovibrionaceae	Paucidesulfovibrio	Paucidesulfovibrio longus	1537	Yes
2523533600	99.83	0	2990149	5	743713	34.7	Yes	1	2	1	High-Quality	Isolate	Bacteria	Actinomycetota	Actinomycetia	Propionibacteriales	Propionibacteriaceae	Aestuariimicrobium	Aestuariimicrobium kwangyangense	1469	Yes
2523533618	99.17	1.65	1787382	46	108852	42.6	Yes	1	1	1	High-Quality	Isolate	Bacteria	Desulfobacterota	Thermodesulfobacteria	Thermodesulfobacteriales	Thermodesulfobacteriaceae	Thermodesulfobacterium	Thermodesulfobacterium thermophilum	2414	No
2524023191	99.45	0.74	2136465	33	168149	36.2	Yes	1	0	3	High-Quality	Isolate	Bacteria	Bacillota	Bacilli	Lactobacillales	Carnobacteriaceae	Lacticigenium	Lacticigenium naphthae	1034	Yes
2528311093	100	0	3559690	27	343091	36.9	Yes	2	3	2	High-Quality	Isolate	Bacteria	Desulfobacterota	Desulfovibrionia	Desulfovibrionales	Desulfovibrionaceae	Oleidesulfovibrio	Oleidesulfovibrio alaskensis	1304	No
2546825528	100	0.34	4067239	25	383958	33.9	No	0	1	2	High-Quality	Isolate	Bacteria	Pseudomonadota	Gammaproteobacteria	Enterobacterales_A	Alteromonadaceae	Pseudoalteromonas	Pseudoalteromonas tetraodonis	498	No
2546825529	99.73	0.54	4739352	57	189368	36.7	No	0	0	6	High-Quality	Isolate	Bacteria	Pseudomonadota	Gammaproteobacteria	Enterobacterales_A	Shewanellaceae	Shewanella	Shewanella algae	431	Yes
2546825530	100	0.86	5371776	34	306750	35.4	No	0	0	2	High-Quality	Isolate	Bacteria	Pseudomonadota	Gammaproteobacteria	Pseudomonadales	Halomonadaceae	Halomonas	Halomonas titanicae	511	No
2546825531	100	0.19	4743861	49	360389	37.2	Yes	2	1	2	High-Quality	Isolate	Bacteria	Pseudomonadota	Gammaproteobacteria	Pseudomonadales	Alcanivoracaceae	Alcanivorax	Alcanivorax xenomutans	1394	Yes
2547132518	98.71	0.17	2897856	11	718028	36.6	Yes	1	1	2	High-Quality	Isolate	Bacteria	Bacteroidota	Bacteroidia	Flavobacteriales	Flavobacteriaceae	Tenacibaculum	Tenacibaculum lutimaris	2310	Yes
2556921016	100	0.43	5365945	35	306398	35.4	No	0	0	3	High-Quality	Isolate	Bacteria	Pseudomonadota	Gammaproteobacteria	Pseudomonadales	Halomonadaceae	Halomonas	Halomonas titanicae	511	Yes
2556921044	100	0.34	4065653	27	407412	34	No	0	1	3	High-Quality	Isolate	Bacteria	Pseudomonadota	Gammaproteobacteria	Enterobacterales_A	Alteromonadaceae	Pseudoalteromonas	Pseudoalteromonas tetraodonis	498	Yes
2556921091	99.68	0	4740410	23	551655	34.4	Yes	2	2	2	High-Quality	Isolate	Bacteria	Pseudomonadota	Alphaproteobacteria	Rhodobacterales	Rhodobacteraceae	Pseudosulfitobacter	Pseudosulfitobacter sp000620505	1721	Yes
2556921675	99.61	0.85	3405955	14	458143	34.9	Yes	1	2	1	High-Quality	Isolate	Bacteria	Pseudomonadota	Alphaproteobacteria	Rhizobiales	Rhizobiaceae	Ahrensia	Ahrensia kielensis	1853	Yes
2558309103	100	0	2156227	2	1228899	40.1	Yes	1	1	1	High-Quality	Isolate	Bacteria	Thermotogota	Thermotogae	Thermotogales	DSM-5069	Pseudothermotoga_B	Pseudothermotoga_B elfii	714	Yes
2558309119	100	0	2165166	2	2165165	39.3	No	0	0	0	High-Quality	Isolate	Bacteria	Thermotogota	Thermotogae	Thermotogales	DSM-5069	Pseudothermotoga_A	Pseudothermotoga_A hypogea	719	Yes
2563366724	100	0.21	2656730	46	139887	40.7	Yes	2	1	4	High-Quality	Isolate	Bacteria	Bacillota_B	Desulfotomaculia	Desulfotomaculales	Desulfovirgulaceae	Desulfofundulus	Desulfofundulus australicus	917	Yes
2565956510	100	0	1513583	15	287535	42	Yes	1	1	1	High-Quality	Isolate	Archaea	Halobacteriota	Methanosarcinia_A	Methanosarcinales_A	Methermicoccaceae	Methermicoccus	Methermicoccus shengliensis	2014	Yes
2565956526	100	0	2149654	12	351769	39.2	Yes	1	1	1	High-Quality	Isolate	Bacteria	Thermotogota	Thermotogae	Thermotogales	DSM-5069	Pseudothermotoga_A	Pseudothermotoga_A hypogea	719	No
2565956541	99.89	0.34	4130813	62	159193	34	No	0	0	2	High-Quality	Isolate	Bacteria	Pseudomonadota	Gammaproteobacteria	Enterobacterales_A	Alteromonadaceae	Pseudoalteromonas	Pseudoalteromonas tetraodonis	498	No
2568526006	99.65	2.1	2163332	26	143239	42.5	Yes	1	1	6	High-Quality	Isolate	Bacteria	Bacillota_A	Clostridia	Eubacteriales	Garciellaceae	Garciella	Garciella nitratireducens	1038	Yes
2568526008	100	0	3179481	53	156304	39.3	Yes	1	1	1	High-Quality	Isolate	Bacteria	Desulfobacterota	Desulfovibrionia	Desulfovibrionales	Desulfovibrionaceae	Paucidesulfovibrio	Paucidesulfovibrio gracilis	1538	Yes
2571042868	92.76	1.82	4916599	252	38414	35.2	Yes	1	1	1	High-Quality	Isolate	Bacteria	Pseudomonadota	Alphaproteobacteria	Sphingomonadales	Sphingomonadaceae	Sphingobium	Sphingobium fuliginis	1762	Yes
2571042918	99.55	1.82	3653213	1	3653213	34.3	Yes	2	2	2	High-Quality	Isolate	Bacteria	Pseudomonadota	Gammaproteobacteria	Nevskiales	Nevskiaceae	Polycyclovorans	Polycyclovorans algicola	1632	Yes
2574179776	98.82	1.36	3805681	2	3800396	35	Yes	1	1	1	High-Quality	Isolate	Bacteria	Pseudomonadota	Gammaproteobacteria	Nevskiales	Algiphilaceae	Algiphilus	Algiphilus aromaticivorans	1595	Yes
2574179777	99.67	1.42	5550230	3	3191249	39.1	Yes	3	3	3	High-Quality	Isolate	Bacteria	Bacteroidota	Bacteroidia	Flavobacteriales	Flavobacteriaceae	Arenibacter	Arenibacter algicola	7	Yes
2574179780	99.42	1.31	4449396	14	726769	37	Yes	3	3	3	High-Quality	Isolate	Bacteria	Pseudomonadota	Gammaproteobacteria	Pseudomonadales	Oleiphilaceae	Marinobacter	Marinobacter salarius	1342	Yes
2576861398	99.26	0.86	2474654	1	2474654	37.4	Yes	1	1	1	High-Quality	Isolate	Bacteria	Pseudomonadota	Gammaproteobacteria	Pseudomonadales	Porticoccaceae	Porticoccus	Porticoccus hydrocarbonoclasticus	1336	Yes
2576861799	84.31	4.95	2305041	542	5778	39	Yes	1	1	2	Medium-Quality	MAG	Bacteria	Bacillota_B	Desulfotomaculia	Desulfotomaculales	Nap2-2B	SCADC1-2-3	SCADC1-2-3 sp000681355	536	No
2576861823	99.9	1	5113782	8	4012167	35.3	Yes	3	3	3	High-Quality	Isolate	Bacteria	Pseudomonadota	Alphaproteobacteria	Rhodobacterales	Rhodobacteraceae	Roseovarius	Genus_Roseovarius	1732	Yes
2579779161	100	0.86	4979193	2	4011492	35	Yes	6	7	7	High-Quality	Isolate	Bacteria	Pseudomonadota	Gammaproteobacteria	Pseudomonadales	Halomonadaceae	Halomonas	Halomonas ventosae_B	511	Yes
2579779169	100	0.3	3881122	5	3541844	34.8	Yes	2	2	2	High-Quality	Isolate	Bacteria	Pseudomonadota	Alphaproteobacteria	Rhodobacterales	Rhodobacteraceae	Actibacterium_C	Genus_Actibacterium_C	1744	Yes
2582580750	100	1.45	4239823	81	96871	39.4	Yes	2	1	2	High-Quality	Isolate	Bacteria	Desulfobacterota	Syntrophobacteria	Syntrophobacterales	DSM-9756	Desulfacinum	Desulfacinum infernum	929	Yes
2593339207	99.35	2.15	3717645	2	3475523	39.3	Yes	3	3	3	High-Quality	Isolate	Bacteria	Desulfobacterota_F	Desulfuromonadia	Desulfuromonadales	Geoalkalibacteraceae	Geoalkalibacter_A	Geoalkalibacter_A subterraneus	1320	Yes
2599185294	70.7	0.34	1573380	56	54175	36.7	Yes	2	1	1	Medium-Quality	MAG	Bacteria	Pseudomonadota	Gammaproteobacteria	Methylococcales	Cycloclasticaceae	Cycloclasticus	Genus_Cycloclasticus	528	Yes
2609460166	90.97	5.16	3198701	245	23029	38.9	Yes	1	2	0	Medium-Quality	Isolate	Bacteria	Desulfobacterota	Syntrophia	Syntrophales	Smithellaceae	Smithella	Smithella sp000747625	1829	No
2648501484	97.53	0.45	4126170	310	25653	33.4	Yes	1	2	2	High-Quality	Isolate	Bacteria	Actinomycetota	Actinomycetia	Mycobacteriales	Mycobacteriaceae	Gordonia	Gordonia sihwensis	1473	Yes
2651870327	99.46	0.52	4840015	8	1229895	32.9	Yes	1	1	3	High-Quality	Isolate	Bacteria	Actinomycetota	Actinomycetia	Mycobacteriales	Mycobacteriaceae	Tsukamurella	Tsukamurella tyrosinosolvens	1475	No
2654587794	98.7	1.47	5677552	397	24367	33.9	Yes	1	1	1	High-Quality	Isolate	Bacteria	Actinomycetota	Actinomycetia	Propionibacteriales	Nocardioidaceae	Nocardioides	Nocardioides luteus_A	1466	Yes
2700988731	91.59	0	1267584	83	20171	42.4	Yes	1	1	0	High-Quality	MAG	Archaea	Thermoproteota	Methanomethylicia	Methanomethylicales	Methanomethylicaceae	Methanosuratincola	Methanosuratincola petrocarbonis	619	No
2700988733	99.07	0.93	1373621	85	24139	40.7	Yes	1	1	1	High-Quality	MAG	Archaea	Thermoproteota	Methanomethylicia	Methanomethylicales	Methanomethylicaceae	Methanomethylicus	Methanomethylicus oleisabuli	624	Yes
2700988734	53.61	0	707181	260	3050	42.4	No	0	0	0	Medium-Quality	MAG	Archaea	Thermoproteota	Methanomethylicia	Methanomethylicales	Methanomethylicaceae	Methanosuratincola	Methanosuratincola petrocarbonis	619	No
2700988735	90.34	0.93	1427070	87	34148	40.5	Yes	1	1	1	High-Quality	MAG	Archaea	Thermoproteota	Methanomethylicia	Methanomethylicales	Methanomethylicaceae	Methanomethylicus	Methanomethylicus mesodigestus	623	No
2700988736	99.07	0.93	1637224	11	256139	40.5	Yes	1	1	1	High-Quality	MAG	Archaea	Thermoproteota	Methanomethylicia	Methanomethylicales	Methanomethylicaceae	Methanomethylicus	Methanomethylicus mesodigestus	623	Yes
2718218328	98.96	0	4162101	1	4162101	37.5	Yes	8	8	8	High-Quality	Isolate	Bacteria	Bacillota	Bacilli	Bacillales	Bacillaceae	Bacillus	Bacillus licheniformis	1042	No
2718218502	99.34	0.04	6057430	38	478444	38.2	Yes	1	1	4	High-Quality	Isolate	Bacteria	Bacillota	Bacilli	Bacillales	Bacillaceae_G	Bacillus_A	Bacillus_A thuringiensis	1039	Yes
2724679046	99.48	0.37	4035104	95	80460	33.4	Yes	1	1	1	High-Quality	Isolate	Bacteria	Pseudomonadota	Alphaproteobacteria	Sphingomonadales	Sphingomonadaceae	Sphingomonas	Sphingomonas sp000282895	1766	Yes
2731639223	99.46	2.96	4727966	36	416125	38.5	Yes	1	1	4	High-Quality	Isolate	Bacteria	Bacteroidota	Bacteroidia	Bacteroidales	Prolixibacteraceae	Prolixibacter	Prolixibacter denitrificans	91	Yes
2731957587	99.49	1.02	2975997	20	165628	32.1	Yes	1	1	1	High-Quality	Isolate	Bacteria	Actinomycetota	Actinomycetia	Actinomycetales	Microbacteriaceae	Microbacterium	Microbacterium oleivorans	1463	Yes
2734482291	99.6	2.06	5331589	21	403143	34.7	Yes	1	1	1	High-Quality	Isolate	Bacteria	Pseudomonadota	Alphaproteobacteria	Rhizobiales	Stappiaceae	Breoghania	Breoghania corrubedonensis	1779	Yes
2740891832	99.34	0.22	4050949	31	278781	36.5	Yes	1	1	9	High-Quality	Isolate	Bacteria	Bacillota	Bacilli	Bacillales	Planococcaceae	Ureibacillus	Ureibacillus xyleni	1059	Yes
2740892189	100	0.07	3958670	70	212596	36.4	Yes	1	1	0	High-Quality	Isolate	Bacteria	Pseudomonadota	Gammaproteobacteria	Pseudomonadales	Oleiphilaceae	Marinobacter	Marinobacter nauticus	1343	No
2754412609	99.59	1.71	5532633	1	5532633	34.6	Yes	4	4	4	High-Quality	Isolate	Bacteria	Pseudomonadota	Alphaproteobacteria	Sphingomonadales	Sphingomonadaceae	Sphingobium	Sphingobium yanoikuyae	1761	No
2756170166	98.28	0	2065517	36	108922	40.7	Yes	1	2	0	High-Quality	Isolate	Bacteria	Thermotogota	Thermotogae	Petrotogales	Petrotogaceae	Petrotoga	Petrotoga sibirica	715	Yes
2756170248	100	1.72	2793031	45	144861	41.3	Yes	1	1	0	High-Quality	Isolate	Bacteria	Thermotogota	Thermotogae	Petrotogales	Petrotogaceae	Oceanotoga	Oceanotoga teriensis	2067	Yes
2757320361	98.28	0	2031923	19	186398	40.7	Yes	1	1	0	High-Quality	Isolate	Bacteria	Thermotogota	Thermotogae	Petrotogales	Petrotogaceae	Petrotoga	Petrotoga olearia	715	No
2767802236	98.96	0	4166290	1	4166290	37.6	Yes	8	8	8	High-Quality	Isolate	Bacteria	Bacillota	Bacilli	Bacillales	Bacillaceae	Bacillus	Bacillus licheniformis	1042	Yes
2770939442	100	0.07	4298724	32	351081	36.5	Yes	1	1	4	High-Quality	Isolate	Bacteria	Pseudomonadota	Gammaproteobacteria	Pseudomonadales	Oleiphilaceae	Marinobacter	Marinobacter nauticus	1343	No
2772190779	100	0	3343428	2	3301026	33.2	Yes	1	1	1	High-Quality	Isolate	Bacteria	Pseudomonadota	Gammaproteobacteria	Burkholderiales	Burkholderiaceae_B	Thiomonas	Thiomonas intermedia	1579	Yes
2778260950	100	1.79	1885773	8	323628	42.3	Yes	1	1	1	High-Quality	Isolate	Bacteria	Thermotogota	Thermotogae	Thermotogales	Thermotogaceae	Thermotoga	Thermotoga petrophila	713	No
2791354853	100	0	1159797	1	1159797	39.3	Yes	1	1	1	High-Quality	MAG	Bacteria	Patescibacteria	Paceibacteria	Paceibacterales	UBA5738	UBA5738	UBA5738 sp022530585	1188	Yes
2795385393	97.58	8.39	3300546	1	3300546	41.2	Yes	1	1	1	Medium-Quality	MAG	Bacteria	Desulfobacterota_F	WTBG01	JAGOGO01	JAGOGO01	Family_JAGOGO01	Family_JAGOGO01	914	Yes
2799112206	99.67	0.66	2174862	1	2174862	39.2	Yes	1	1	1	High-Quality	MAG	Archaea	Halobacteriota	Methanomicrobia	Methanomicrobiales	Methanoregulaceae	MVRE01	Genus_MVRE01	254	Yes
2802428857	98.98	0.67	2575920	79	82592	40.7	Yes	1	1	2	High-Quality	Isolate	Bacteria	Bacillota_A	Thermoanaerobacteria	Thermoanaerobacterales	Thermoanaerobacteraceae	Caldanaerobacter	Caldanaerobacter subterraneus	2440	Yes
2806310715	97.83	0.45	4278779	23	314419	34.9	Yes	2	1	2	High-Quality	Isolate	Bacteria	Pseudomonadota	Alphaproteobacteria	Rhodobacterales	Rhodobacteraceae	Wenxinia	Wenxinia marina	1746	No
2816332323	98.99	0.02	4027302	118	94173	37.6	Yes	1	1	6	High-Quality	Isolate	Bacteria	Bacillota	Bacilli	Bacillales	Bacillaceae	Bacillus	Bacillus paralicheniformis	1042	Yes
2828614168	100	1.09	3845430	45	179655	39	Yes	1	1	1	High-Quality	Isolate	Bacteria	Bacteroidota	Bacteroidia	Bacteroidales	Dysgonomonadaceae	Petrimonas	Petrimonas sp002356435	680	Yes
2833391513	100	1.01	4780028	33	267537	34	Yes	1	1	2	High-Quality	Isolate	Bacteria	Pseudomonadota	Alphaproteobacteria	Rhizobiales	Stappiaceae	Pannonibacter	Pannonibacter carbonis	1780	Yes
2844586914	100	0.54	3584069	43	180819	35.2	Yes	1	1	1	High-Quality	Isolate	Bacteria	Pseudomonadota	Gammaproteobacteria	Pseudomonadales	Halomonadaceae	Modicisalibacter	Modicisalibacter tunisiensis	1614	No
2881906619	99.43	2.2	5345954	188	60530	34.8	Yes	1	1	1	High-Quality	Isolate	Bacteria	Pseudomonadota	Alphaproteobacteria	Rhizobiales	Rhizobiaceae	Aquibium	Aquibium carbonis	1781	Yes
2902743475	99.95	1.94	4701666	80	106214	36.5	Yes	1	1	1	High-Quality	Isolate	Bacteria	Pseudomonadota	Gammaproteobacteria	Pseudomonadales	Halomonadaceae	Halomonas	Halomonas bachuensis	1616	Yes
2939866076	100	1.31	2438126	1	2438126	42	Yes	3	3	4	High-Quality	Isolate	Archaea	Halobacteriota	Methanomicrobia	Methanomicrobiales	Methanomicrobiaceae	Methanomicrobium	Genus_Methanomicrobium	100	Yes
2945865373	100	0.25	4265502	11	3153741	37.8	Yes	1	1	3	High-Quality	Isolate	Bacteria	Bacteroidota	Bacteroidia	Flavobacteriales	Weeksellaceae	Chryseobacterium	Chryseobacterium oranimense	193	Yes
2965873108	99.33	0.11	6349902	1	6349902	37.3	Yes	3	3	3	High-Quality	Isolate	Bacteria	Pseudomonadota	Gammaproteobacteria	Pseudomonadales	Pseudomonadaceae	Pseudomonas	Pseudomonas aeruginosa	1621	No
2965879112	98.78	0.11	6401521	1	6401521	37.3	Yes	3	3	3	High-Quality	Isolate	Bacteria	Pseudomonadota	Gammaproteobacteria	Pseudomonadales	Pseudomonadaceae	Pseudomonas	Pseudomonas aeruginosa	1621	No
2987194425	98.28	0	2072934	43	80526	40.7	Yes	1	3	0	High-Quality	Isolate	Bacteria	Thermotogota	Thermotogae	Petrotogales	Petrotogaceae	Petrotoga	Petrotoga sibirica	715	No
2987196469	98.28	0	2031766	22	255428	40.7	Yes	1	1	0	High-Quality	Isolate	Bacteria	Thermotogota	Thermotogae	Petrotogales	Petrotogaceae	Petrotoga	Petrotoga olearia	715	Yes
2996234726	100	1.8	4420996	97	120548	36.7	Yes	1	2	3	High-Quality	Isolate	Bacteria	Pseudomonadota	Gammaproteobacteria	Pseudomonadales	Halomonadaceae	Halomonas	Halomonas kenyensis	1617	Yes
2998784146	99.57	0	2974161	43	161298	35.8	Yes	1	1	1	High-Quality	Isolate	Bacteria	Pseudomonadota	Alphaproteobacteria	Sphingomonadales	Rhodothalassiaceae	Iodidimonas	Iodidimonas sp000710935	1262	Yes
3007338929	99.17	0.11	6368297	1	6368297	37.3	Yes	4	4	4	High-Quality	Isolate	Bacteria	Pseudomonadota	Gammaproteobacteria	Pseudomonadales	Pseudomonadaceae	Pseudomonas	Pseudomonas aeruginosa	1621	No
3008042202	99.45	1.1	2635899	5	2344483	35.9	No	0	0	5	High-Quality	Isolate	Bacteria	Bacillota	Bacilli	Staphylococcales	Staphylococcaceae	Staphylococcus	Staphylococcus kloosii	2172	Yes
637000095	100	0	3730232	1	3730232	37	Yes	4	4	4	High-Quality	Isolate	Bacteria	Desulfobacterota	Desulfovibrionia	Desulfovibrionales	Desulfovibrionaceae	Oleidesulfovibrio	Oleidesulfovibrio alaskensis	1304	Yes
639633037	100	0.5	4779762	3	4326849	36.2	Yes	3	3	3	High-Quality	Isolate	Bacteria	Pseudomonadota	Gammaproteobacteria	Pseudomonadales	Oleiphilaceae	Marinobacter	Marinobacter nauticus	1343	No
643348514	98.95	0.61	5506207	3	5214195	37.9	Yes	13	13	13	High-Quality	Isolate	Bacteria	Bacillota	Bacilli	Bacillales	Bacillaceae_G	Bacillus_A	Bacillus_A paranthracis	1039	No
646564527	98.22	0.86	3222077	1	3222077	38.8	Yes	2	2	2	High-Quality	Isolate	Bacteria	Deferribacterota	Deferribacteres	Deferribacterales	Denitrovibrionaceae	Denitrovibrio	Denitrovibrio acetiphilus	162	Yes
650716078	100	0	3924810	2	3883605	35.1	Yes	2	2	2	High-Quality	Isolate	Bacteria	Pseudomonadota	Gammaproteobacteria	Burkholderiales	Burkholderiaceae_C	Pusillimonas_C	Pusillimonas_C sp000209655	1049	Yes
8019462135	100	1.31	2438126	1	2438126	42	Yes	3	3	4	High-Quality	Isolate	Archaea	Halobacteriota	Methanomicrobia	Methanomicrobiales	Methanomicrobiaceae	Methanomicrobium	Genus_Methanomicrobium	100	No
ArcobacterL32A.gbk_genome_assembly	71.19	0.71	1594013	690	2636	38.2	No	0	0	0	Medium-Quality	MAG	Bacteria	Campylobacterota	Campylobacteria	Campylobacterales	Arcobacteraceae	Arcobacter	Genus_Arcobacter	2230	Yes
asm_GCA_000009365_1.LargeContigs	100	0	3120143	1	3120143	36.7	Yes	3	3	1	High-Quality	Isolate	Bacteria	Pseudomonadota	Gammaproteobacteria	Pseudomonadales	Alcanivoracaceae	Alcanivorax	Alcanivorax borkumensis	1397	Yes
asm_GCA_000475175_1.LargeContigs	100	0.19	4697326	104	125004	37.2	Yes	1	1	0	High-Quality	Isolate	Bacteria	Pseudomonadota	Gammaproteobacteria	Pseudomonadales	Alcanivoracaceae	Alcanivorax	Alcanivorax xenomutans	1394	No
asm_GCA_000475255_1.LargeContigs	100	0.09	3559739	117	86139	36.8	Yes	1	1	1	High-Quality	Isolate	Bacteria	Pseudomonadota	Gammaproteobacteria	Pseudomonadales	Oleiphilaceae	Marinobacter	Marinobacter vinifirmus	1344	No
asm_GCA_000475275_1.LargeContigs	99.37	0.47	6831407	70	478574	35.5	Yes	1	1	1	High-Quality	Isolate	Bacteria	Pseudomonadota	Alphaproteobacteria	Rhizobiales	Stappiaceae	Roseibium	Roseibium aggregatum_A	1676	Yes
asm_GCA_000475295_1.LargeContigs	100	0.37	3636972	76	181484	36.9	Yes	1	1	0	High-Quality	Isolate	Bacteria	Pseudomonadota	Gammaproteobacteria	Pseudomonadales	Alcanivoracaceae	Alcanivorax	Alcanivorax profundi	1414	Yes
asm_GCA_000475315_1.LargeContigs	100	0.07	3979725	106	212596	36.4	Yes	1	1	1	High-Quality	Isolate	Bacteria	Pseudomonadota	Gammaproteobacteria	Pseudomonadales	Oleiphilaceae	Marinobacter	Marinobacter nauticus	1343	No
asm_GCA_000475335_1.LargeContigs	100	0.05	3440295	80	159063	34.7	Yes	1	1	0	High-Quality	Isolate	Bacteria	Pseudomonadota	Gammaproteobacteria	Pseudomonadales	Moraxellaceae	Acinetobacter	Acinetobacter venetianus	468	Yes
asm_GCA_000475355_1.LargeContigs	100	0	4126405	105	150583	36.4	Yes	1	1	1	High-Quality	Isolate	Bacteria	Pseudomonadota	Gammaproteobacteria	Pseudomonadales	Oleiphilaceae	Marinobacter	Marinobacter nauticus	1343	Yes
asm_GCA_000475375_1.LargeContigs	100	0.79	4301017	71	273738	36.5	Yes	1	1	1	High-Quality	Isolate	Bacteria	Pseudomonadota	Gammaproteobacteria	Pseudomonadales	Oleiphilaceae	Marinobacter	Marinobacter nauticus	1343	No
asm_GCA_000475395_1.LargeContigs	99.37	0.47	6831462	63	478574	35.5	Yes	1	1	0	High-Quality	Isolate	Bacteria	Pseudomonadota	Alphaproteobacteria	Rhizobiales	Stappiaceae	Roseibium	Roseibium aggregatum_A	1676	No
asm_GCA_000475415_1.LargeContigs	99.95	0.43	3668536	228	46654	35.6	Yes	1	1	0	High-Quality	Isolate	Bacteria	Pseudomonadota	Gammaproteobacteria	Pseudomonadales	Halomonadaceae	Halomonas	Halomonas shengliensis	1615	Yes
asm_GCA_001507855_1.LargeContigs	99.57	0.43	3564665	90	81585	34.5	No	0	0	1	High-Quality	MAG	Bacteria	Pseudomonadota	Gammaproteobacteria	Pseudomonadales	Halomonadaceae	Halomonas	Halomonas sp001507855	512	Yes
asm_GCA_001507915_1.LargeContigs	98.81	0.62	2133833	107	28629	41.5	Yes	1	1	0	High-Quality	MAG	Bacteria	Desulfobacterota	Desulfovibrionia	Desulfovibrionales	Desulfonauticaceae	Desulfonauticus	Desulfonauticus sp001507915	250	No
asm_GCA_001507935_1.LargeContigs	77.53	2.02	1695123	272	7931	40.7	No	0	1	1	Medium-Quality	MAG	Archaea	Methanobacteriota_B	Thermococci	Thermococcales	Thermococcaceae	Thermococcus_A	Thermococcus_A sp001507935	1907	No
asm_GCA_001507955_1.LargeContigs	98.93	0.84	1356511	169	10921	41.6	No	0	1	1	High-Quality	MAG	Archaea	Methanobacteriota	Methanobacteria	Methanobacteriales	Methanothermobacteraceae_A	Methanothermobacter_A	Methanothermobacter_A sp001507955	2097	Yes
asm_GCA_001507975_1.LargeContigs	96.51	0.65	1293648	42	57160	42.1	Yes	1	1	1	High-Quality	MAG	Archaea	Halobacteriota	Methanosarcinia_A	Methanosarcinales_A	Methermicoccaceae	Methermicoccus	Methermicoccus shengliensis	2014	No
asm_GCA_001507995_1.LargeContigs	94.43	0.85	2060924	168	17729	40.8	No	0	0	1	High-Quality	MAG	Bacteria	Bacillota_A	Thermoanaerobacteria	Thermoanaerobacterales	Thermoanaerobacteraceae	Caldanaerobacter	Caldanaerobacter subterraneus	2440	No
asm_GCA_001508005_1.LargeContigs	91.24	0.95	1673988	30	83500	42.2	No	0	0	0	High-Quality	MAG	Bacteria	Bacillota_B	Moorellia	DTU086	DTU086	41-269	41-269 sp001508005	568	Yes
asm_GCA_001508035_1.LargeContigs	74.37	0.4	1374049	99	20317	40.7	No	0	0	0	Medium-Quality	MAG	Bacteria	Bacillota_B	Moorellia	Moorellales	Moorellaceae	UBA12545	UBA12545 sp003509545	899	Yes
asm_GCA_001508055_1.LargeContigs	87.07	0.16	1804169	267	8697	40.8	No	0	0	0	Medium-Quality	MAG	Bacteria	Thermotogota	Thermotogae	Petrotogales	Petrotogaceae	Petrotoga	Petrotoga olearia	715	No
asm_GCA_001508065_1.LargeContigs	91.58	3.47	1890359	107	37539	41.1	No	0	0	0	High-Quality	MAG	Archaea	Methanobacteriota_B	Thermococci	Thermococcales	Thermococcaceae	Thermococcus_A	Thermococcus_A sibiricus	1910	No
asm_GCA_001508095_1.LargeContigs	77.92	1.67	1134876	157	9749	42.8	Yes	1	1	1	Medium-Quality	MAG	Bacteria	Desulfobacterota	Thermodesulfobacteria	Thermodesulfobacteriales	Thermodesulfobacteriaceae	Thermodesulfobacterium	Thermodesulfobacterium commune	2414	No
asm_GCA_001508115_1.LargeContigs	98.28	0.86	2025630	203	14087	40.1	No	0	0	0	High-Quality	MAG	Bacteria	Thermotogota	Thermotogae	Thermotogales	DSM-5069	Pseudothermotoga_B	Pseudothermotoga_B elfii	714	No
asm_GCA_001508125_1.LargeContigs	80.21	1.79	1654406	269	8044	42.4	Yes	1	2	1	Medium-Quality	MAG	Bacteria	Thermotogota	Thermotogae	Thermotogales	Thermotogaceae	Thermotoga	Thermotoga petrophila	713	No
asm_GCA_001508155_1.LargeContigs	89.83	0.15	1810203	33	97673	41.7	Yes	1	1	10	Medium-Quality	MAG	Bacteria	Bipolaricaulota	Bipolaricaulia	Bipolaricaulales	Bipolaricaulaceae	64-32	64-32 sp001508155	891	Yes
asm_GCA_001508175_1.LargeContigs	82.67	0.5	1481501	102	23584	40.8	Yes	1	1	1	Medium-Quality	MAG	Archaea	Methanobacteriota_B	Thermococci	Thermococcales	Thermococcaceae	Thermococcus_A	Thermococcus_A sibiricus	1910	No
asm_GCA_001508185_1.LargeContigs	97.82	0	1340747	59	34303	42	Yes	1	1	0	High-Quality	MAG	Archaea	Halobacteriota	Methanosarcinia_A	Methanosarcinales_A	Methermicoccaceae	Methermicoccus	Methermicoccus shengliensis	2014	No
asm_GCA_001508215_1.LargeContigs	73.64	1.79	1497637	301	5611	42.4	No	0	0	3	Medium-Quality	MAG	Bacteria	Bacillota_B	DSM-12270	Thermacetogeniales	Thermacetogeniaceae	Thermacetogenium	Thermacetogenium phaeum	656	Yes
asm_GCA_001508235_1.LargeContigs	50.31	0.23	1298250	218	6992	37.8	No	0	1	2	Medium-Quality	MAG	Bacteria	Bacillota_B	Desulfotomaculia	Ammonifexales	UBA12532	UBA12532	UBA12532 sp003445475	923	Yes
asm_GCA_001508275_1.LargeContigs	94.17	2.78	2228088	133	29600	35.5	Yes	2	2	3	High-Quality	MAG	Bacteria	Actinomycetota	Coriobacteriia	OPB41	UBA2279	UBA7930	UBA7930 sp003453535	1444	Yes
asm_GCA_001508295_1.LargeContigs	96.55	3.45	2119081	106	46853	39.4	Yes	1	1	2	High-Quality	MAG	Bacteria	Thermotogota	Thermotogae	Thermotogales	DSM-5069	Pseudothermotoga_A	Pseudothermotoga_A sp003510135	719	No
asm_GCA_001508335_1.LargeContigs	94.51	0	1861827	25	139749	44.6	Yes	1	1	3	High-Quality	MAG	Bacteria	WOR-3	32-111	32-111	32-111	32-111	32-111 sp001508335	663	Yes
asm_GCA_001508355_1.LargeContigs	72.89	0.1	1629409	246	7656	39.3	Yes	1	0	3	Medium-Quality	MAG	Bacteria	Marinisomatota	AB16	AB16	46-47	46-47	46-47 sp001509335	2447	No
asm_GCA_001508375_1.LargeContigs	91.54	9.02	2328136	136	28135	41	No	0	0	2	Medium-Quality	MAG	Bacteria	Bacillota_B	Desulfotomaculia	Desulfotomaculales	Nap2-2B	46-80	46-80 sp003485325	1134	Yes
asm_GCA_001508395_1.LargeContigs	91.53	4.24	1772227	296	8062	41.7	No	0	0	1	High-Quality	MAG	Bacteria	Synergistota	Synergistia	Synergistales	Thermovirgaceae	UBA1876	UBA1876 sp003446665	639	No
asm_GCA_001508435_1.LargeContigs	63.79	0.86	1225111	267	5097	41.4	No	0	0	0	Medium-Quality	MAG	Bacteria	Thermotogota	Thermotogae	Petrotogales	Kosmotogaceae	Mesotoga	Mesotoga sp003228205	724	No
asm_GCA_001508455_1.LargeContigs	82.71	4.58	1973787	224	12444	39.8	Yes	1	0	4	Medium-Quality	MAG	Archaea	Halobacteriota	Methanomicrobia	Methanomicrobiales	Methanocorpusculaceae	Methanocalculus	Methanocalculus sp9912u	341	No
asm_GCA_001508475_1.LargeContigs	69.55	8.28	1023183	134	11699	35.1	No	0	0	2	Medium-Quality	MAG	Bacteria	Chloroflexota	Anaerolineae	Anaerolineales	Anaerolineaceae	49-20	49-20 sp003445715	938	Yes
asm_GCA_001508485_1.LargeContigs	56.68	3.6	1716233	436	4205	38.3	No	0	0	2	Medium-Quality	MAG	Bacteria	Bacteroidota	Bacteroidia	Bacteroidales	Dysgonomonadaceae	Proteiniphilum	Proteiniphilum sp003517675	686	No
asm_GCA_001508515_1.LargeContigs	64.84	0.86	1712609	440	3996	41.1	No	0	0	1	Medium-Quality	MAG	Bacteria	Thermotogota	Thermotogae	Petrotogales	Kosmotogaceae	Mesotoga	Mesotoga sp002752635	723	No
asm_GCA_001508535_1.LargeContigs	74.42	9.3	708389	104	8759	36.3	No	0	1	4	Medium-Quality	MAG	Bacteria	Patescibacteria	Microgenomatia	UBA1400	PJMF01	Family_PJMF01	Family_PJMF01	74	Yes
asm_GCA_001508575_1.LargeContigs	93.02	3.3	2118879	65	86489	44.3	Yes	1	1	1	High-Quality	MAG	Bacteria	WOR-3	32-111	32-111	32-111	32-111	32-111 sp001508335	663	No
asm_GCA_001508595_1.LargeContigs	75.91	0.91	1452568	228	7839	37.7	Yes	1	0	2	Medium-Quality	MAG	Bacteria	Chloroflexota	Anaerolineae	Anaerolineales	Anaerolineaceae	Brevefilum	Brevefilum sp001508595	939	Yes
asm_GCA_001508615_1.LargeContigs	96.05	0	2259086	67	45646	42.2	No	0	0	1	High-Quality	MAG	Archaea	Halobacteriota	Methanosarcinia	Methanotrichales	Methanotrichaceae	Methanothrix_A	Methanothrix_A harundinacea_D	2036	No
asm_GCA_001508665_1.LargeContigs	87.63	1.47	1825960	342	6135	38.7	No	0	1	1	Medium-Quality	MAG	Archaea	Halobacteriota	Methanomicrobia	Methanomicrobiales	Methanoculleaceae	Methanoculleus	Methanoculleus marisnigri_B	345	No
asm_GCA_001508735_1.LargeContigs	96.75	0	2111309	105	42414	40.7	No	0	0	2	High-Quality	MAG	Bacteria	Bacillota_A	Thermoanaerobacteria	Thermoanaerobacterales	Thermoanaerobacteraceae	Thermoanaerobacter	Thermoanaerobacter pseudethanolicus	2441	Yes
asm_GCA_001508745_1.LargeContigs	95.59	0.65	2037571	99	34454	41.2	Yes	2	1	0	High-Quality	MAG	Archaea	Halobacteriota	Archaeoglobi	Archaeoglobales	Archaeoglobaceae	Archaeoglobus	Archaeoglobus fulgidus	1	No
asm_GCA_001508775_1.LargeContigs	92.08	0.62	1293238	129	14695	42.8	Yes	1	1	1	High-Quality	MAG	Bacteria	Desulfobacterota	Thermodesulfobacteria	Thermodesulfobacteriales	Thermodesulfobacteriaceae	Thermodesulfobacterium	Thermodesulfobacterium commune	2414	No
asm_GCA_001508795_1.LargeContigs	96.55	3.45	1972267	77	64063	39.5	Yes	1	2	0	High-Quality	MAG	Bacteria	Thermotogota	Thermotogae	Thermotogales	DSM-5069	Pseudothermotoga_A	Pseudothermotoga_A sp003510135	719	No
asm_GCA_001508815_1.LargeContigs	96.73	0.65	2017823	153	19697	41.1	Yes	1	1	1	High-Quality	MAG	Archaea	Halobacteriota	Archaeoglobi	Archaeoglobales	Archaeoglobaceae	Archaeoglobus	Archaeoglobus fulgidus	1	No
asm_GCA_001508835_1.LargeContigs	84.1	0.15	1407079	245	7071	44.9	No	0	0	11	Medium-Quality	MAG	Bacteria	Synergistota	GBS-1	GBS-1	GBS-1	42-11	42-11 sp001508835	951	No
asm_GCA_001508855_1.LargeContigs	93.62	0.63	1774841	121	22930	42.1	No	0	0	3	High-Quality	MAG	Bacteria	Bacillota_B	DSM-12270	Thermacetogeniales	Thermacetogeniaceae	50-218	50-218 sp001508855	1441	Yes
asm_GCA_001508875_1.LargeContigs	68.81	0	1253740	213	8058	42.2	Yes	1	1	4	Medium-Quality	MAG	Bacteria	Thermotogota	Thermotogae	Thermotogales	Thermotogaceae	Thermotoga	Thermotoga petrophila	713	No
asm_GCA_001508895_1.LargeContigs	62.51	0.96	1275041	284	4863	40.7	No	0	0	1	Medium-Quality	MAG	Bacteria	Bacillota_A	Thermoanaerobacteria	Thermoanaerobacterales	Thermoanaerobacteraceae	Thermoanaerobacter	Thermoanaerobacter pseudethanolicus	2441	No
asm_GCA_001508915_1.LargeContigs	92.92	0.97	1391929	89	23726	42.6	Yes	1	1	1	High-Quality	MAG	Bacteria	Desulfobacterota	Thermodesulfobacteria	Thermodesulfobacteriales	Thermodesulfobacteriaceae	Thermodesulfobacterium	Thermodesulfobacterium commune	2414	No
asm_GCA_001508935_1.LargeContigs	94.92	0	1651366	152	16571	41	No	0	0	1	High-Quality	MAG	Bacteria	Synergistota	Synergistia	Synergistales	Thermosynergistaceae	Thermosynergistes	Thermosynergistes sp001508935	621	No
asm_GCA_001508975_1.LargeContigs	90.83	1.85	1255134	161	12395	44.1	No	0	0	1	High-Quality	MAG	Bacteria	Synergistota	Synergistia	Synergistales	Thermovirgaceae	58-81	58-81 sp001509095	651	No
asm_GCA_001508995_1.LargeContigs	83.49	2.53	2251381	107	35230	40.9	No	0	0	0	Medium-Quality	MAG	Bacteria	Bacillota_B	Desulfotomaculia	Desulfotomaculales	Nap2-2B	46-80	46-80 sp003513005	1133	Yes
asm_GCA_001509005_1.LargeContigs	97.6	0	2173293	219	13369	41.4	No	0	0	0	High-Quality	MAG	Archaea	Methanobacteriota	Methanobacteria	Methanobacteriales	Methanobacteriaceae	Methanobacterium	Methanobacterium formicicum	2102	Yes
asm_GCA_001509055_1.LargeContigs	60.47	4.65	543380	105	5798	39	No	0	0	1	Medium-Quality	MAG	Bacteria	Patescibacteria	Microgenomatia	0-14-0-10-38-17	0-14-0-10-38-17	Family_0-14-0-10-38-17	Family_0-14-0-10-38-17	86	Yes
asm_GCA_001509095_1.LargeContigs	95.76	0	1333167	148	16394	44	No	0	0	1	High-Quality	MAG	Bacteria	Synergistota	Synergistia	Synergistales	Thermovirgaceae	58-81	58-81 sp001509095	651	Yes
asm_GCA_001509115_1.LargeContigs	72.81	0.16	1622264	264	8308	41.7	Yes	1	1	2	Medium-Quality	MAG	Bacteria	Thermotogota	Thermotogae	Petrotogales	Kosmotogaceae	Mesotoga	Mesotoga sp003228205	724	No
asm_GCA_001509135_1.LargeContigs	93.97	3.92	2038846	288	9487	40	No	0	0	2	High-Quality	MAG	Bacteria	Thermotogota	Thermotogae	Petrotogales	Kosmotogaceae	UBA9910	UBA9910 sp003444085	726	Yes
asm_GCA_001509155_1.LargeContigs	95.2	5.08	1535045	241	8139	42.1	No	0	0	0	Medium-Quality	MAG	Bacteria	Synergistota	Synergistia	Synergistales	Thermovirgaceae	UBA1876	UBA1876 sp003446665	639	No
asm_GCA_001509175_1.LargeContigs	60.66	0.27	1123127	292	4073	38.1	No	0	0	1	Medium-Quality	MAG	Bacteria	Bacteroidota	Bacteroidia	Bacteroidales	Dysgonomonadaceae	Proteiniphilum	Proteiniphilum sp003517675	686	Yes
asm_GCA_001509255_1.LargeContigs	72.12	0.98	1592820	304	6071	38.7	No	0	0	1	Medium-Quality	MAG	Archaea	Halobacteriota	Methanomicrobia	Methanomicrobiales	Methanoculleaceae	Methanoculleus	Methanoculleus marisnigri_B	345	No
asm_GCA_001509275_1.LargeContigs	80.02	2.69	2137321	379	6933	38.6	No	0	0	2	Medium-Quality	MAG	Bacteria	Bacteroidota	Bacteroidia	Bacteroidales	TTA-H9	TTA-H9	TTA-H9 sp002418865	2316	No
asm_GCA_001509285_1.LargeContigs	64.41	5.08	894916	86	17295	42.1	No	0	0	7	Medium-Quality	MAG	Bacteria	Atribacterota	JS1	SB-45	34-128	34-128	34-128 sp003451675	2192	Yes
asm_GCA_001509335_1.LargeContigs	86.81	1.28	2030215	271	9680	39.2	Yes	1	1	1	Medium-Quality	MAG	Bacteria	Marinisomatota	AB16	AB16	46-47	46-47	46-47 sp001509335	2447	Yes
asm_GCA_001509345_1.LargeContigs	94.41	0.25	1882878	156	19503	41	No	0	0	2	High-Quality	MAG	Bacteria	Bacillota_A	Clostridia	Tissierellales	Dethiosulfatibacteraceae	38-11	38-11 sp001509345	1035	Yes
asm_GCA_001509375_1.LargeContigs	100	0	2382964	118	34660	42.1	Yes	1	1	0	High-Quality	MAG	Archaea	Halobacteriota	Methanosarcinia	Methanotrichales	Methanotrichaceae	Methanothrix_A	Methanothrix_A harundinacea_D	2036	Yes
asm_GCA_001509385_1.LargeContigs	88.87	4.11	1601429	316	6296	40.7	Yes	1	1	7	Medium-Quality	MAG	Bacteria	Thermotogota	Thermotogae	Petrotogales	Petrotogaceae	Petrotoga	Petrotoga sibirica	715	No
asm_GCA_001566785_1.LargeContigs	83.87	1.24	2704258	110	33913	37.1	No	0	0	2	Medium-Quality	MAG	Bacteria	Pseudomonadota	Gammaproteobacteria	Pseudomonadales	Alcanivoracaceae	Alcanivorax	Alcanivorax venustensis	1395	Yes
asm_GCA_001566805_1.LargeContigs	91.73	0.26	4229149	301	17989	36	No	0	0	1	High-Quality	MAG	Bacteria	Pseudomonadota	Alphaproteobacteria	Rhodospirillales_A	Thalassospiraceae	Thalassospira	Thalassospira tepidiphila	811	Yes
asm_GCA_001566815_1.LargeContigs	95.12	1.18	4466715	95	63875	37	No	0	0	1	High-Quality	MAG	Bacteria	Pseudomonadota	Gammaproteobacteria	Pseudomonadales	Oleiphilaceae	Marinobacter	Marinobacter salarius	1342	No
asm_GCA_001566825_1.LargeContigs	51.61	0	1333246	126	12131	37	No	0	0	3	Medium-Quality	MAG	Bacteria	Pseudomonadota	Gammaproteobacteria	Methylococcales	Cycloclasticaceae	Cycloclasticus	Cycloclasticus sp001566825	519	No
asm_GCA_001566885_1.LargeContigs	85.55	3.05	3130987	265	14501	35.8	No	0	0	4	Medium-Quality	MAG	Bacteria	Pseudomonadota	Gammaproteobacteria	Pseudomonadales	Nitrincolaceae	Neptuniibacter	Neptuniibacter pectenicola	502	Yes
asm_GCA_001566895_1.LargeContigs	69.55	5.05	3063290	332	10360	33.8	No	0	0	9	Medium-Quality	MAG	Bacteria	Pseudomonadota	Gammaproteobacteria	Enterobacterales_A	Alteromonadaceae	Cognaticolwellia	Cognaticolwellia aestuarii	488	Yes
asm_GCA_001577545_1.LargeContigs	96.37	3.12	2826786	392	16586	37.7	No	0	0	7	High-Quality	MAG	Bacteria	Bacillota_F	Halanaerobiia	Halanaerobiales	Halanaerobiaceae	Halanaerobium	Halanaerobium congolense	2438	Yes
asm_GCA_001577555_1.LargeContigs	93.95	1.63	1952418	260	10742	41.2	No	0	0	11	High-Quality	MAG	Archaea	Halobacteriota	Methanosarcinia	Methanosarcinales	Methanosarcinaceae	Methanohalophilus	Methanohalophilus euhalobius	2030	No
asm_GCA_001577565_1.LargeContigs	97.34	0.68	2654040	145	23796	40.3	Yes	1	1	7	High-Quality	MAG	Archaea	Halobacteriota	Methanosarcinia	Methanosarcinales	Methanosarcinaceae	Methanolobus	Methanolobus zinderi	2026	Yes
asm_GCA_001577625_1.LargeContigs	78.01	1.03	2210664	198	12196	40.4	No	0	0	4	Medium-Quality	MAG	Bacteria	Bacillota_F	Halanaerobiia	Halobacteroidales	Acetohalobiaceae	Frackibacter	Frackibacter sp900114655	2356	No
asm_GCA_001577635_1.LargeContigs	100	0.54	3421069	55	105047	35.1	No	0	0	1	High-Quality	MAG	Bacteria	Pseudomonadota	Gammaproteobacteria	Pseudomonadales	Halomonadaceae	Modicisalibacter	Modicisalibacter sp001577635	1614	Yes
asm_GCA_001577655_1.LargeContigs	100	0	2723656	38	127204	34.7	No	0	0	1	High-Quality	MAG	Bacteria	Pseudomonadota	Gammaproteobacteria	Enterobacterales_A	Alteromonadaceae	Idiomarina	Idiomarina baltica	805	Yes
asm_GCA_001634835_1.LargeContigs	99.63	4.93	3659598	509	20669	36.9	Yes	2	3	1	High-Quality	Isolate	Bacteria	Pseudomonadota	Gammaproteobacteria	Pseudomonadales	Alcanivoracaceae	Alcanivorax	Alcanivorax sp900107995	1398	No
asm_GCA_001635515_1.LargeContigs	99.63	2.62	3635447	378	25724	37	Yes	1	1	7	High-Quality	Isolate	Bacteria	Pseudomonadota	Gammaproteobacteria	Pseudomonadales	Alcanivoracaceae	Alcanivorax	Alcanivorax sp900107995	1398	No
asm_GCA_001635525_1.LargeContigs	99.63	1.3	3620498	286	46304	36.9	Yes	2	2	2	High-Quality	Isolate	Bacteria	Pseudomonadota	Gammaproteobacteria	Pseudomonadales	Alcanivoracaceae	Alcanivorax	Alcanivorax sp900107995	1398	No
asm_GCA_001723995_1.LargeContigs	75.36	1.96	1473446	157	9741	37.9	Yes	1	0	1	Medium-Quality	MAG	Bacteria	Bacillota_F	Halanaerobiia	Halanaerobiales	Halanaerobiaceae	Halanaerobium	Halanaerobium congolense	2438	No
asm_GCA_001726015_1.LargeContigs	99.18	0	1885778	23	194616	41.3	No	0	0	2	High-Quality	MAG	Archaea	Halobacteriota	Methanosarcinia	Methanosarcinales	Methanosarcinaceae	Methanohalophilus	Methanohalophilus euhalobius	2030	No
asm_GCA_002049785_1.LargeContigs	58.91	1.1	1330663	136	9849	42.9	No	0	1	5	Medium-Quality	MAG	Bacteria	WOR-3	WOR-3	SM23-42	SM23-42	4484-100	4484-100 sp002049785	1074	Yes
asm_GCA_002049795_1.LargeContigs	93.88	7.28	2653461	181	21068	38.5	No	0	0	9	Medium-Quality	MAG	Bacteria	Desulfobacterota	Desulfobaccia	Desulfobaccales	Desulfobaccaceae	Desulfobacca_B	Desulfobacca_B sp002049795	252	No
asm_GCA_002049825_1.LargeContigs	61.44	0	1736815	213	8395	39.1	No	0	0	1	Medium-Quality	MAG	Bacteria	Calditrichota	Calditrichia	RBG-13-44-9	RBG-13-44-9	4484-188	4484-188 sp002049825	2452	Yes
asm_GCA_002049835_1.LargeContigs	58.99	6.59	1484297	193	7494	38.8	No	0	0	1	Medium-Quality	MAG	Bacteria	Cloacimonadota	Cloacimonadia	Cloacimonadales	TCS61	B137-G9	B137-G9 sp003647825	152	No
asm_GCA_002049845_1.LargeContigs	65.38	3.36	1669944	170	10648	40.4	No	0	0	1	Medium-Quality	MAG	Bacteria	Fermentibacterota	Fermentibacteria	Fermentibacterales	Fermentibacteraceae	Sabulitectum	Sabulitectum sp003646025	812	No
asm_GCA_002049885_1.LargeContigs	52.84	0	1459809	170	8606	37.3	No	0	0	4	Medium-Quality	MAG	Bacteria	Planctomycetota	Phycisphaerae	SM23-33	SM23-33	MVCS01	MVCS01 sp002049885	1420	Yes
asm_GCA_002049895_1.LargeContigs	74.55	1.61	1267843	108	14054	42.3	No	0	1	0	Medium-Quality	MAG	Bacteria	Omnitrophota	Koll11	Duberdicusellales	4484-171	4484-171	4484-171 sp002049895	2289	Yes
asm_GCA_002049905_1.LargeContigs	71.59	7.31	2951864	363	8250	42.9	No	0	0	9	Medium-Quality	MAG	Bacteria	Desulfobacterota	DSM-4660	Desulfatiglandales	Desulfatiglandaceae	JAGGXA01	JAGGXA01 sp021163285	2153	Yes
asm_GCA_002049945_1.LargeContigs	64.38	0.55	1105728	125	9297	39.4	No	0	0	4	Medium-Quality	MAG	Bacteria	Cloacimonadota	Cloacimonadia	JGIOTU-2	JGIOTU-2	JGIOTU-2	JGIOTU-2 sp002049945	2142	Yes
asm_GCA_002049955_1.LargeContigs	72.7	5.76	910875	38	30303	37.8	No	0	0	10	Medium-Quality	MAG	Bacteria	Campylobacterota	Campylobacteria	Campylobacterales	Arcobacteraceae	B24-G6	Genus_B24-G6	1985	Yes
asm_GCA_002049985_1.LargeContigs	54.03	0	995193	102	10121	42	No	0	0	2	Medium-Quality	MAG	Bacteria	Latescibacterota	MVCY01	MVCY01	MVCY01	MVCY01	MVCY01 sp002049985	325	No
asm_GCA_002050005_1.LargeContigs	65.26	9.16	2915744	327	8776	42.3	Yes	1	0	2	Medium-Quality	MAG	Bacteria	Desulfobacterota	DSM-4660	Desulfatiglandales	Desulfatiglandaceae	B46-G9	B46-G9 sp003646815	289	No
asm_GCA_002050025_1.LargeContigs	64.43	2.58	2372750	232	10997	42	Yes	1	0	3	Medium-Quality	MAG	Bacteria	Desulfobacterota	DSM-4660	Desulfatiglandales	Desulfatiglandaceae	4484-190-2	4484-190-2 sp002050025	276	Yes
asm_GCA_002050035_1.LargeContigs	76.64	0.85	1543928	122	16221	37.7	No	0	1	2	Medium-Quality	MAG	Bacteria	4484-113	4484-113	4484-113	4484-113	4484-113	4484-113 sp002050035	684	Yes
asm_GCA_002059205_1.LargeContigs	76.68	0	1596965	192	8182	40.4	No	0	0	1	Medium-Quality	MAG	Bacteria	Latescibacterota	4484-107	4484-107	4484-107	4484-107	4484-107 sp002059205	154	Yes
asm_GCA_002084345_1.LargeContigs	59.7	8.18	2439481	264	9375	36.2	No	0	0	1	Medium-Quality	MAG	Bacteria	Chloroflexota	Anaerolineae	JAFGEY01	JAFGEY01	Family_JAFGEY01	Family_JAFGEY01	593	Yes
asm_GCA_002084355_1.LargeContigs	79.28	0	2605891	151	21166	40.7	No	0	0	7	Medium-Quality	MAG	Bacteria	Bacteroidota	Bacteroidia	Bacteroidales	4572-128	4572-128	4572-128 sp002084355	2388	Yes
asm_GCA_002084375_1.LargeContigs	52.13	9.94	2096262	221	9562	40.8	No	0	0	1	Medium-Quality	MAG	Bacteria	Desulfobacterota	Desulfobacteria	Desulfobacterales	UBA11574	S5133MH16	Genus_S5133MH16	287	No
asm_GCA_002084385_1.LargeContigs	61.77	0	1167285	119	9533	39.2	Yes	1	1	10	Medium-Quality	MAG	Bacteria	Desulfobacterota	Desulfobacteria	Desulfobacterales	NBLS01	NBLS01	NBLS01 sp002084385	2273	Yes
asm_GCA_002084425_1.LargeContigs	80.65	0	1943540	24	118521	40.9	No	0	0	1	Medium-Quality	MAG	Bacteria	Desulfobacterota	Desulfobacteria	Desulfobacterales	Desulfobacteraceae	4572-130	4572-130 sp002084425	2509	Yes
asm_GCA_002084435_1.LargeContigs	70.18	2.63	979420	54	33401	38.3	No	0	0	6	Medium-Quality	MAG	Bacteria	Bacillota	Bacilli	Izemoplasmatales	UBA5603	4572-104	4572-104 sp002084435	2076	Yes
asm_GCA_002084445_1.LargeContigs	54.09	1.12	1347050	147	9901	42.3	No	0	0	0	Medium-Quality	MAG	Bacteria	Fusobacteriota	Fusobacteriia	Fusobacteriales	Order_Fusobacteriales	Order_Fusobacteriales	Order_Fusobacteriales	2087	Yes
asm_GCA_002084455_1.LargeContigs	83.95	1.23	606867	46	17749	41.5	Yes	1	0	1	Medium-Quality	MAG	Bacteria	Pseudomonadota	Gammaproteobacteria	Enterobacterales	Enterobacteriaceae	Buchnera	Buchnera aphidicola_I	2125	Yes
asm_GCA_002084505_1.LargeContigs	58.95	0	662122	49	16506	39	No	0	0	0	Medium-Quality	MAG	Bacteria	Pseudomonadota	Alphaproteobacteria	Rs-D84	NBLK01	NBLK01	NBLK01 sp002084505	2402	Yes
asm_GCA_002084525_1.LargeContigs	51.72	0	3377579	294	12943	38.4	No	0	0	0	Medium-Quality	MAG	Bacteria	Bacteroidota	Bacteroidia	Bacteroidales	NBLH01	NBLH01	NBLH01 sp002084525	2328	Yes
asm_GCA_002084535_1.LargeContigs	58.13	1.1	2260459	254	8998	40	No	0	0	1	Medium-Quality	MAG	Bacteria	KSB1	UBA2214	AABM5-25-91	AABM5-25-91	NBLI01	NBLI01 sp002084535	208	Yes
asm_GCA_002084545_1.LargeContigs	80.59	4.52	3181930	168	20517	40	No	0	0	1	Medium-Quality	MAG	Bacteria	Desulfobacterota	Desulfobacteria	Desulfobacterales	4572-123	4572-123	4572-123 sp002084545	234	Yes
asm_GCA_002084585_1.LargeContigs	89.77	1.14	1814332	119	18989	37.6	Yes	1	1	0	Medium-Quality	MAG	Bacteria	Planctomycetota	Phycisphaerae	Sedimentisphaerales	Anaerohalosphaeraceae	4572-13	4572-13 sp002084585	2507	Yes
asm_GCA_002084605_1.LargeContigs	64.77	0	1706845	160	11082	35.7	No	0	0	1	Medium-Quality	MAG	Bacteria	Actinomycetota	Actinomycetia	Propionibacteriales	Propionibacteriaceae	Cutibacterium	Cutibacterium acnes	293	Yes
asm_GCA_002084615_1.LargeContigs	55.26	3.51	1031651	104	9649	40	No	0	0	1	Medium-Quality	MAG	Bacteria	Thermotogota	Thermotogae	Petrotogales	Petrotogaceae	Marinitoga	Genus_Marinitoga	710	Yes
asm_GCA_002084625_1.LargeContigs	77.09	7.27	3496831	283	15007	36.3	No	0	0	1	Medium-Quality	MAG	Bacteria	Chloroflexota	Anaerolineae	B4-G1	B4-G1	B4-G1	B4-G1 sp003648025	592	No
asm_GCA_002084665_1.LargeContigs	81.21	0.32	1895117	129	19791	38.2	No	0	0	1	Medium-Quality	MAG	Bacteria	Desulfobacterota_F	Desulfuromonadia	Desulfuromonadales	Desulfuromonadaceae	Desulfuromonas	Desulfuromonas sp002084665	618	Yes
asm_GCA_002084685_1.LargeContigs	63.05	3.23	1813724	170	11271	41.6	No	0	0	1	Medium-Quality	MAG	Bacteria	Desulfobacterota	DSM-4660	Desulfatiglandales	B25-G16	B33-G16	B33-G16 sp003646875	280	No
asm_GCA_002084705_1.LargeContigs	90.32	4.52	2328692	166	18456	38.2	No	0	0	1	High-Quality	MAG	Bacteria	Desulfobacterota_F	Desulfuromonadia	Desulfuromonadales	Desulfuromonadaceae	Desulfuromonas	Desulfuromonas sp002084705	1904	Yes
asm_GCA_002084715_1.LargeContigs	50.88	8.67	2550588	274	10028	35.6	No	0	0	2	Medium-Quality	MAG	Bacteria	Chloroflexota	Anaerolineae	Anaerolineales	UBA11858	B10-G9	Genus_B10-G9	615	No
asm_GCA_002084745_1.LargeContigs	59.7	9.85	2814170	311	9156	34.7	No	0	0	0	Medium-Quality	MAG	Bacteria	Chloroflexota	Anaerolineae	Anaerolineales	UBA11858	Family_UBA11858	Family_UBA11858	616	Yes
asm_GCA_002084765_1.LargeContigs	98.77	0	4085200	110	66716	39.6	Yes	1	1	0	High-Quality	MAG	Bacteria	4572-55	4572-55	4572-55	4572-55	4572-55	4572-55 sp002084765	768	Yes
asm_GCA_002084785_1.LargeContigs	71.8	8.13	2016626	193	10925	40.2	No	0	0	0	Medium-Quality	MAG	Bacteria	Spirochaetota	Spirochaetia	Spirochaetales_E	DSM-19205	Family_DSM-19205	Family_DSM-19205	2235	Yes
asm_GCA_002084805_1.LargeContigs	99.2	1.2	3287989	93	56323	41.1	No	0	0	1	High-Quality	MAG	Bacteria	Spirochaetota	Spirochaetia	Spirochaetales_E	Spirochaetaceae_B	Oceanispirochaeta	Oceanispirochaeta sp002084805	146	Yes
asm_GCA_002084825_1.LargeContigs	74.34	0	1368484	77	25019	43.5	Yes	1	0	1	Medium-Quality	MAG	Bacteria	Fusobacteriota	Fusobacteriia	Fusobacteriales	Fusobacteriaceae	Psychrilyobacter	Psychrilyobacter sp002084825	569	Yes
asm_GCA_002084835_1.LargeContigs	50.91	4.13	1369572	145	10121	38	No	0	0	1	Medium-Quality	MAG	Bacteria	Cloacimonadota	Cloacimonadia	Cloacimonadales	JAFGVF01	JAEKNW01	Genus_JAEKNW01	2234	Yes
asm_GCA_002084865_1.LargeContigs	53.39	0	1069080	116	10195	42.3	No	0	0	0	Medium-Quality	MAG	Bacteria	Atribacterota	JS1	SB-45	34-128	34-128	34-128 sp002084865	2190	Yes
asm_GCA_002084875_1.LargeContigs	77.27	0	4104200	252	22165	35.7	Yes	2	1	0	Medium-Quality	MAG	Bacteria	Chloroflexota	Anaerolineae	4572-78	4572-78	4572-78	4572-78 sp002084875	523	Yes
asm_GCA_002084905_1.LargeContigs	58.88	8.48	984449	122	7988	36.5	No	0	0	1	Medium-Quality	MAG	Bacteria	Campylobacterota	Campylobacteria	Campylobacterales	Sulfurovaceae	Sulfurovum	Genus_Sulfurovum	2245	Yes
asm_GCA_002084915_1.LargeContigs	70.07	7.69	2421345	272	8957	42.3	No	0	1	0	Medium-Quality	MAG	Bacteria	WOR-3	E44-bin80	E44-bin80	E44-bin80	Family_E44-bin80	Family_E44-bin80	2281	Yes
asm_GCA_002084945_1.LargeContigs	55.17	3.45	3008664	330	9120	41.5	No	0	0	0	Medium-Quality	MAG	Bacteria	Desulfobacterota	DSM-4660	Desulfatiglandales	Desulfatiglandaceae	NaphS2	Genus_NaphS2	1527	Yes
asm_GCA_002084955_1.LargeContigs	100	0	826021	39	29935	40.3	Yes	1	0	1	High-Quality	MAG	Bacteria	Patescibacteria	4484-211	4484-211	4484-211	4484-211	4484-211 sp002084955	1879	Yes
asm_GCA_002084985_1.LargeContigs	63.73	0	974182	109	9777	44.2	No	0	0	0	Medium-Quality	MAG	Bacteria	Thermotogota	Thermotogae	Thermotogales	Thermotogaceae	4484-232	4484-232 sp002084985	699	No
asm_GCA_002085025_1.LargeContigs	78.36	4.84	932608	53	23494	42.6	Yes	1	0	0	Medium-Quality	MAG	Bacteria	Omnitrophota	4484-213	4484-213	4484-213	4484-213	4484-213 sp002085025	682	Yes
asm_GCA_002085035_1.LargeContigs	64.6	1.1	1433169	154	9752	39.4	Yes	2	1	2	Medium-Quality	MAG	Bacteria	JdFR-76	JdFR-76	JdFR-76	4484-219	4484-219	4484-219 sp002085035	331	No
asm_GCA_002085065_1.LargeContigs	53.5	8.94	1955540	300	6466	35.9	Yes	1	0	1	Medium-Quality	MAG	Bacteria	Chloroflexota	Anaerolineae	Anaerolineales	EnvOPS12	Desulfolinea	Genus_Desulfolinea	615	No
asm_GCA_002085085_1.LargeContigs	65.77	0	1577185	141	12709	37.4	No	0	0	0	Medium-Quality	MAG	Bacteria	Campylobacterota	Campylobacteria	Campylobacterales	Sulfurimonadaceae	4484-230	4484-230 sp002085085	98	Yes
asm_GCA_002085095_1.LargeContigs	62.31	7.42	1936194	239	7976	41.5	No	0	0	1	Medium-Quality	MAG	Bacteria	Desulfobacterota	DSM-4660	Desulfatiglandales	Desulfatiglandaceae	Desulfacyla	Desulfacyla sp021159525	228	Yes
asm_GCA_002085115_1.LargeContigs	89.68	1.11	2336261	128	23741	40.7	No	0	0	0	Medium-Quality	MAG	Bacteria	Desulfobacterota	Desulfobacteria	Desulfobacterales	Desulfosudaceae	Desulfosudis	Desulfosudis sp002085115	230	Yes
asm_GCA_002085145_1.LargeContigs	88.37	4.65	726962	53	18899	40.8	Yes	1	1	1	Medium-Quality	MAG	Bacteria	Patescibacteria	ABY1	UBA2591	UBA6264	JAIPGN01	Genus_JAIPGN01	2188	Yes
asm_GCA_002085165_1.LargeContigs	56.03	8.62	3470413	385	9376	40.5	Yes	1	0	0	Medium-Quality	MAG	Bacteria	Bacteroidota	Bacteroidia	Bacteroidales	JAADJA01	JAADJA01	Genus_JAADJA01	785	Yes
asm_GCA_002085205_1.LargeContigs	62.29	0	972117	113	8657	39.7	No	0	0	0	Medium-Quality	MAG	Bacteria	Cloacimonadota	Cloacimonadia	Cloacimonadales	TCS61	4484-275	4484-275 sp002085205	871	No
asm_GCA_002085215_1.LargeContigs	62.37	1.34	3321047	342	10384	40.7	No	0	0	2	Medium-Quality	MAG	Bacteria	Bacteroidota	Bacteroidia	Bacteroidales	4484-276	4484-276	4484-276 sp002254335	759	Yes
asm_GCA_002085225_1.LargeContigs	70.53	8.61	1619325	76	26020	37	No	0	0	0	Medium-Quality	MAG	Bacteria	Campylobacterota	Campylobacteria	Campylobacterales	QNZT01	Family_QNZT01	Family_QNZT01	2247	Yes
asm_GCA_002085265_1.LargeContigs	62.93	0	891312	85	10225	44.6	No	0	0	7	Medium-Quality	MAG	Bacteria	Omnitrophota	Koll11	4484-49	4484-49	4484-49	4484-49 sp002085265	1129	Yes
asm_GCA_002085285_1.LargeContigs	69.78	2.2	1531283	161	9626	41.7	Yes	1	0	7	Medium-Quality	MAG	Bacteria	Krumholzibacteriota	Krumholzibacteria	Krumholzibacteriales	Krumholzibacteriaceae	4484-7	4484-7 sp002085285	1878	Yes
asm_GCA_002085305_1.LargeContigs	65.53	0.82	1127112	124	9332	36.5	No	0	0	15	Medium-Quality	MAG	Bacteria	Campylobacterota	Campylobacteria	Campylobacterales	Sulfurovaceae	Sulfurovum	Sulfurovum sp002085305	2241	Yes
asm_GCA_002085315_1.LargeContigs	68.97	5.17	1701160	76	31220	44.8	Yes	3	1	1	Medium-Quality	MAG	Bacteria	Omnitrophota	Koll11	Duberdicusellales	4484-171	Family_4484-171	Family_4484-171	1075	Yes
asm_GCA_002085345_1.LargeContigs	75.27	7.53	1650317	142	13215	45.3	No	0	0	1	Medium-Quality	MAG	Bacteria	Omnitrophota	Koll11	Duberdicusellales	4484-171	Family_4484-171	Family_4484-171	1077	Yes
asm_GCA_002085355_1.LargeContigs	72.53	1.16	2720207	274	10413	38.7	No	0	0	1	Medium-Quality	MAG	Bacteria	KSB1	UBA2214	AABM5-25-91	AABM5-25-91	4484-87	4484-87 sp002085355	334	Yes
asm_GCA_002085375_1.LargeContigs	79.67	3.91	2174732	159	16619	42	No	0	0	2	Medium-Quality	MAG	Bacteria	Zixibacteria	MSB-5A5	UBA10806	4484-95	4484-95	4484-95 sp002085375	2177	No
asm_GCA_002085385_1.LargeContigs	71.98	2.2	1290791	129	10175	41.3	No	0	0	8	Medium-Quality	MAG	Bacteria	UBP14	UBA6098	4484-93	4484-93	4484-93	4484-93 sp002085385	1173	Yes
asm_GCA_002085425_1.LargeContigs	59.77	3.37	955968	109	8708	44.6	No	0	0	0	Medium-Quality	MAG	Bacteria	RBG-13-66-14	B26-G2	B26-G2	B26-G2	B26-G2	B26-G2 sp003647715	18	No
asm_GCA_002085445_1.LargeContigs	85.52	2.3	8451742	406	31406	34.7	No	0	0	5	Medium-Quality	MAG	Bacteria	Pseudomonadota	Gammaproteobacteria	Beggiatoales	Beggiatoaceae	UBA10656	UBA10656 sp002085445	310	No
asm_GCA_002085455_1.LargeContigs	81.99	9.52	5126500	434	13785	39.6	No	0	0	0	Medium-Quality	MAG	Bacteria	Desulfobacterota	Desulfobacteria	Desulfobacterales	4be13	Family_4be13	Family_4be13	991	Yes
asm_GCA_002085465_1.LargeContigs	54.79	0	1695517	98	18162	40.8	No	0	0	1	Medium-Quality	MAG	Bacteria	Desulfobacterota	Desulfobacteria	Desulfobacterales	Desulfobacteraceae	NBML01	NBML01 sp002085465	2514	Yes
asm_GCA_002101205_1.LargeContigs	91.27	1.72	1916434	77	99813	36.9	Yes	1	1	4	High-Quality	MAG	Bacteria	Pseudomonadota	Gammaproteobacteria	Methylococcales	Cycloclasticaceae	Cycloclasticus	Cycloclasticus sp002101205	530	Yes
asm_GCA_002101225_1.LargeContigs	96.75	1.05	2321044	244	27724	37.9	Yes	1	1	4	High-Quality	MAG	Bacteria	Pseudomonadota	Gammaproteobacteria	Methylococcales	Cycloclasticaceae	Cycloclasticus	Cycloclasticus sp002101225	524	Yes
asm_GCA_002101235_1.LargeContigs	97.13	2.07	2130426	123	82558	36.9	Yes	1	1	1	High-Quality	MAG	Bacteria	Pseudomonadota	Gammaproteobacteria	Methylococcales	Cycloclasticaceae	Cycloclasticus	Cycloclasticus sp002101235	531	Yes
asm_GCA_002162675_1.LargeContigs	94.94	1.38	4011205	72	112000	33.8	No	0	0	1	High-Quality	MAG	Bacteria	Pseudomonadota	Gammaproteobacteria	Enterobacterales_A	Alteromonadaceae	Colwellia	Colwellia sp002162675	483	Yes
asm_GCA_002162685_1.LargeContigs	99.67	5.45	3752198	23	312216	36.2	No	0	0	9	Medium-Quality	MAG	Bacteria	Bacteroidota	Bacteroidia	Flavobacteriales	Flavobacteriaceae	Psychroserpens	Psychroserpens sp002162685	2305	Yes
asm_GCA_002162695_1.LargeContigs	97.59	0.36	2210308	15	263020	36	No	0	0	1	High-Quality	MAG	Bacteria	Pseudomonadota	Gammaproteobacteria	Methylococcales	Cycloclasticaceae	Cycloclasticus	Cycloclasticus sp002162695	527	Yes
asm_GCA_002162705_1.LargeContigs	83.36	1.35	1803240	192	12739	37	No	0	0	2	Medium-Quality	MAG	Bacteria	Pseudomonadota	Gammaproteobacteria	Methylococcales	Cycloclasticaceae	Cycloclasticus	Cycloclasticus sp002162705	529	Yes
asm_GCA_002162755_1.LargeContigs	97.45	0.43	3054255	31	159009	36.8	No	0	0	1	High-Quality	MAG	Bacteria	Pseudomonadota	Gammaproteobacteria	Pseudomonadales	Porticoccaceae	50-400-T64	50-400-T64 sp002162755	506	Yes
asm_GCA_002162765_1.LargeContigs	94.55	0.17	3156390	19	288632	36.7	No	0	0	3	High-Quality	MAG	Bacteria	Bacteroidota	Bacteroidia	Flavobacteriales	Flavobacteriaceae	MAAR01	MAAR01 sp002162765	2313	Yes
asm_GCA_002162795_1.LargeContigs	98.5	0.89	4335868	111	63335	35.9	No	0	0	3	High-Quality	MAG	Bacteria	Pseudomonadota	Alphaproteobacteria	Rhodobacterales	Rhodobacteraceae	Parasedimentitalea	Parasedimentitalea sp002162795	510	Yes
asm_GCA_002162815_1.LargeContigs	94.75	0.49	2949125	76	74532	36.6	No	0	0	1	High-Quality	MAG	Bacteria	Pseudomonadota	Gammaproteobacteria	Pseudomonadales	Porticoccaceae	50-400-T64	50-400-T64 sp002162815	1404	Yes
asm_GCA_002162825_1.LargeContigs	84.73	0.99	2276691	98	40198	36.9	Yes	1	0	1	Medium-Quality	MAG	Bacteria	Pseudomonadota	Gammaproteobacteria	Pseudomonadales	Porticoccaceae	50-400-T64	50-400-T64 sp002162825	1405	Yes
asm_GCA_002162835_1.LargeContigs	91.9	1.28	3038145	214	23606	36	Yes	1	0	1	High-Quality	MAG	Bacteria	Bacteroidota	Bacteroidia	Flavobacteriales	Flavobacteriaceae	Nonlabens	Nonlabens dokdonensis_B	2307	Yes
asm_GCA_002162875_1.LargeContigs	98.26	1.87	3417319	26	264280	36	No	0	0	0	High-Quality	MAG	Bacteria	Pseudomonadota	Alphaproteobacteria	Rhodobacterales	Rhodobacteraceae	UBA3077	UBA3077 sp002162875	509	Yes
asm_GCA_002162885_1.LargeContigs	98.83	0	3567932	23	992746	34.6	No	0	0	0	High-Quality	MAG	Bacteria	Pseudomonadota	Alphaproteobacteria	Rhodobacterales	Rhodobacteraceae	Litorivita	Litorivita pollutaquae	1723	Yes
asm_GCA_002162915_1.LargeContigs	75.11	0.43	1476473	134	14744	37.5	No	0	0	1	Medium-Quality	MAG	Bacteria	Pseudomonadota	Alphaproteobacteria	Kiloniellales	Kiloniellaceae	Kiloniella	Kiloniella sp002162915	964	Yes
asm_GCA_002162925_1.LargeContigs	92.42	1.23	3618190	94	48427	35.4	No	0	0	6	High-Quality	MAG	Bacteria	Pseudomonadota	Gammaproteobacteria	Enterobacterales_A	Alteromonadaceae	Thalassotalea_A	Thalassotalea_A sp002162925	493	Yes
asm_GCA_002162955_1.LargeContigs	96.79	1.39	6486279	58	152970	37.2	No	0	0	1	High-Quality	MAG	Bacteria	Pseudomonadota	Gammaproteobacteria	Pseudomonadales	Ketobacteraceae	42-54-T18	42-54-T18 sp002162955	494	Yes
asm_GCA_002162965_1.LargeContigs	66	2.13	2518157	753	4789	35.6	No	0	0	1	Medium-Quality	MAG	Bacteria	Pseudomonadota	Gammaproteobacteria	Pseudomonadales	DSM-6294	Oleispira	Genus_Oleispira	422	Yes
asm_GCA_002162985_1.LargeContigs	80.2	3.06	2540546	350	9916	36.6	Yes	1	0	1	Medium-Quality	MAG	Bacteria	Pseudomonadota	Gammaproteobacteria	Pseudomonadales	DSM-6294	Bermanella	Bermanella sp002162985	1354	Yes
asm_GCA_002163005_1.LargeContigs	91.25	3.41	4614230	121	65097	34.8	No	0	0	1	High-Quality	MAG	Bacteria	Pseudomonadota	Gammaproteobacteria	Enterobacterales_A	Alteromonadaceae	Colwellia	Colwellia psychrerythraea_C	484	Yes
asm_GCA_002163025_1.LargeContigs	89.84	1.38	4021833	365	19390	35.4	No	0	0	0	Medium-Quality	MAG	Bacteria	Pseudomonadota	Gammaproteobacteria	Pseudomonadales	Nitrincolaceae	Rs1	Rs1 sp002163025	501	Yes
asm_GCA_002163055_1.LargeContigs	63.73	3.37	2338601	628	4738	35.7	No	0	0	1	Medium-Quality	MAG	Bacteria	Pseudomonadota	Gammaproteobacteria	Pseudomonadales	Marinomonadaceae	Marinomonas	Genus_Marinomonas	2065	Yes
asm_GCA_002163065_1.LargeContigs	93.63	2.44	1955517	198	17759	35.9	No	0	0	1	High-Quality	MAG	Bacteria	Campylobacterota	Campylobacteria	Campylobacterales	Arcobacteraceae	MAAG01	MAAG01 sp002163065	2228	Yes
asm_GCA_002163085_1.LargeContigs	92.61	0.18	2137961	15	530857	34.9	Yes	1	0	4	High-Quality	MAG	Bacteria	Pseudomonadota	Gammaproteobacteria	Nitrosococcales	Methylophagaceae	41-12-T18	41-12-T18 sp002163085	443	Yes
asm_GCA_002163115_1.LargeContigs	93.13	1.08	2429248	94	81673	33.9	No	0	0	1	High-Quality	MAG	Bacteria	Pseudomonadota	Gammaproteobacteria	Nitrosococcales	Methylophagaceae	41-12-T18	41-12-T18 sp002163115	444	Yes
asm_GCA_002163135_1.LargeContigs	99.57	1.52	4002346	41	139412	37.3	Yes	1	0	1	High-Quality	MAG	Bacteria	Pseudomonadota	Alphaproteobacteria	Sneathiellales	Sneathiellaceae	Sneathiella	Sneathiella sp002163135	2486	Yes
asm_GCA_002163155_1.LargeContigs	94.2	3.12	4547261	16	587193	39.8	Yes	1	1	0	High-Quality	MAG	Bacteria	Bdellovibrionota	Bacteriovoracia	Bacteriovoracales	Bacteriovoracaceae	Halobacteriovorax	Halobacteriovorax marinus_A	2365	Yes
asm_GCA_002163175_1.LargeContigs	78.57	7.39	1564908	134	18917	34.8	No	0	0	0	Medium-Quality	MAG	Bacteria	Pseudomonadota	Gammaproteobacteria	Nitrosococcales	Methylophagaceae	41-12-T18	41-12-T18 sp002163085	443	No
asm_GCA_002163215_1.LargeContigs	84.79	0.18	1591573	123	22119	36	No	0	0	1	Medium-Quality	MAG	Bacteria	Pseudomonadota	Gammaproteobacteria	Methylococcales	Cycloclasticaceae	Cycloclasticus	Cycloclasticus sp002162695	527	No
asm_GCA_002163245_1.LargeContigs	97.04	1.64	6664629	199	88620	36.9	No	0	0	1	High-Quality	MAG	Bacteria	Pseudomonadota	Gammaproteobacteria	Pseudomonadales	Ketobacteraceae	42-54-T18	42-54-T18 sp002163245	517	Yes
asm_GCA_002215665_1.LargeContigs	89.64	0.4	1623433	73	44724	45.6	Yes	1	1	1	Medium-Quality	MAG	Bacteria	WOR-3	UBA3072	UBA3072	UBA3072	UBA3072	UBA3072 sp002215665	105	Yes
asm_GCA_002245405_1.LargeContigs	95.6	8.39	2484955	230	18319	45.2	Yes	1	1	5	Medium-Quality	MAG	Bacteria	WOR-3	UBA3073	UBA3073	UBA3073	UBA3073	UBA3073 sp002366725	106	Yes
asm_GCA_002245415_1.LargeContigs	93.55	3.71	2084090	190	17763	40.9	Yes	1	1	1	High-Quality	MAG	Bacteria	WOR-3	WOR-3	UBA2258	UBA2258	UBA3079	UBA3079 sp002366635	2189	Yes
asm_GCA_002254285_1.LargeContigs	69.51	1.34	2227754	191	13690	37.7	No	0	0	0	Medium-Quality	MAG	Bacteria	Bacteroidota	Bacteroidia	Bacteroidales	UBA1556	4572-112	4572-112 sp002254285	198	Yes
asm_GCA_002254295_1.LargeContigs	90.86	9.68	4094135	300	19025	38.2	No	0	0	1	Medium-Quality	MAG	Bacteria	Bacteroidota	Bacteroidia	Bacteroidales	UBA12170	UBA12170	Genus_UBA12170	1855	Yes
asm_GCA_002254335_1.LargeContigs	58.06	1.08	2652601	244	12235	41.5	No	0	0	3	Medium-Quality	MAG	Bacteria	Bacteroidota	Bacteroidia	Bacteroidales	4484-276	4484-276	4484-276 sp002254335	759	No
asm_GCA_002256535_1.LargeContigs	53.3	0.55	886404	78	13585	41.2	Yes	2	0	7	Medium-Quality	MAG	Bacteria	WOR-3	UBA3073	NMUJ01	NMUJ01	NMUJ01	NMUJ01 sp002256535	733	Yes
asm_GCA_002298825_1.LargeContigs	100	0	3053661	26	162710	35.3	No	0	0	0	High-Quality	MAG	Bacteria	Pseudomonadota	Gammaproteobacteria	Pseudomonadales	Moraxellaceae	Acinetobacter	Acinetobacter radioresistens	464	Yes
asm_GCA_002304835_1.LargeContigs	83.6	0	1455888	30	90566	41.6	No	0	0	4	Medium-Quality	MAG	Bacteria	Bacillota_A	Clostridia	Peptostreptococcales	Anaerovoracaceae	UBA1422	UBA1422 sp002304835	355	Yes
asm_GCA_002304845_1.LargeContigs	88.37	2.33	513459	53	12665	37.7	Yes	1	0	4	Medium-Quality	MAG	Bacteria	Patescibacteria	Microgenomatia	UBA12405	UBA12405	UBA12158	UBA12158 sp002304845	60	Yes
asm_GCA_002304855_1.LargeContigs	56.74	0	408231	19	32244	38.4	No	0	0	4	Medium-Quality	MAG	Bacteria	Bacillota	Bacilli	RF39	UBA660	UBA660	UBA660 sp002304855	691	Yes
asm_GCA_002304865_1.LargeContigs	98.66	0.31	2987545	68	73443	35.3	No	0	0	4	High-Quality	MAG	Bacteria	Pseudomonadota	Gammaproteobacteria	Pseudomonadales	Moraxellaceae	Acinetobacter	Acinetobacter radioresistens	464	No
asm_GCA_002304915_1.LargeContigs	83.61	2.06	2108534	134	21959	34.1	No	0	0	1	Medium-Quality	MAG	Bacteria	Verrucomicrobiota	Kiritimatiellia	LD1-PB3_B	Lenti-01	Lenti-01	Lenti-01 sp002304915	704	Yes
asm_GCA_002304925_1.LargeContigs	96.24	1.08	3378305	32	159742	40.2	No	0	0	1	High-Quality	MAG	Bacteria	Bacteroidota	Bacteroidia	Bacteroidales	Prolixibacteraceae	UBA1413	UBA1413 sp002304925	296	Yes
asm_GCA_002304935_1.LargeContigs	95.81	2.73	1709222	58	60140	42.4	No	0	0	2	High-Quality	MAG	Bacteria	Actinomycetota	Humimicrobiia	Humimicrobiales	Humimicrobiaceae	Humimicrobium	Humimicrobium oleiphilum	667	Yes
asm_GCA_002304945_1.LargeContigs	89.53	0.56	2979416	157	34523	33.2	No	0	0	0	Medium-Quality	MAG	Bacteria	Actinomycetota	Actinomycetia	Actinomycetales	Actinomycetaceae	UBA1383	UBA1383 sp002304945	1445	Yes
asm_GCA_002304995_1.LargeContigs	92.58	3.37	3423250	148	42465	37.2	No	0	0	1	High-Quality	MAG	Bacteria	Desulfobacterota	Syntrophia	Syntrophales	Smithellaceae	UBA8904	UBA8904 sp002304995	1834	Yes
asm_GCA_002305015_1.LargeContigs	91.8	0.55	2198060	48	77792	38.9	No	0	0	4	High-Quality	MAG	Bacteria	Bacteroidota	Bacteroidia	Bacteroidales	Dysgonomonadaceae	UBA4179	UBA4179 sp002305015	681	Yes
asm_GCA_002305035_1.LargeContigs	96.04	0	2477004	73	58403	35.9	No	0	0	4	High-Quality	MAG	Bacteria	Actinomycetota	Coriobacteriia	Coriobacteriales	Coriobacteriaceae	Collinsella	Collinsella sp002305035	583	Yes
asm_GCA_002305045_1.LargeContigs	96.64	1.68	1737792	22	107495	43	No	0	0	1	High-Quality	MAG	Bacteria	Bacillota_A	Clostridia	Oscillospirales	Ruminococcaceae	Faeciplasma	Faeciplasma avium	653	Yes
asm_GCA_002305075_1.LargeContigs	97.32	2.07	1734203	26	79771	38.1	No	0	0	1	High-Quality	MAG	Bacteria	Bacillota_A	Clostridia	Oscillospirales	Ruminococcaceae	UBA1404	UBA1404 sp002305075	1220	Yes
asm_GCA_002305085_1.LargeContigs	98.39	0	2650327	26	144225	40	No	0	0	8	High-Quality	MAG	Bacteria	Bacteroidota	Bacteroidia	Bacteroidales	UBA1402	UBA1402	UBA1402 sp002305085	750	Yes
asm_GCA_002305115_1.LargeContigs	90.7	2.33	846488	6	544424	34.9	Yes	1	1	9	High-Quality	MAG	Bacteria	Patescibacteria	WWE3	UBA101185	UBA10185	UBA1401	UBA1401 sp002305115	317	Yes
asm_GCA_002305125_1.LargeContigs	86.05	2.33	1027614	52	32770	39	Yes	1	1	5	Medium-Quality	MAG	Bacteria	Patescibacteria	Microgenomatia	UBA1400	UBA1400	UBA1400	UBA1400 sp002305125	685	Yes
asm_GCA_002305155_1.LargeContigs	74.66	0.34	1597197	151	14539	39.4	No	0	0	0	Medium-Quality	MAG	Bacteria	Bacillota_A	Clostridia	UBA1381	UBA1381	UBA1381	Genus_UBA1381	1191	Yes
asm_GCA_002305165_1.LargeContigs	93.52	0.93	4127996	66	120169	38.5	Yes	1	0	1	High-Quality	MAG	Bacteria	Armatimonadota	UBA5377	UBA1398	UBA1398	UBA1398	UBA1398 sp002305165	860	Yes
asm_GCA_002305205_1.LargeContigs	90.7	0	728200	27	46086	41.4	Yes	2	0	0	High-Quality	MAG	Bacteria	Patescibacteria	WWE3	UBA101185	UBA10185	UBA1397	UBA1397 sp002305205	75	Yes
asm_GCA_002305235_1.LargeContigs	80.67	0.62	2585657	235	14970	38	No	0	0	0	Medium-Quality	MAG	Bacteria	Bacteroidota	Bacteroidia	Bacteroidales	Bacteroidaceae	Prevotella	Prevotella sp002305235	1105	Yes
asm_GCA_002305255_1.LargeContigs	86.17	1.69	2253718	99	43520	36.9	No	0	0	1	Medium-Quality	MAG	Bacteria	Bacillota_G	SHA-98	DTUO25	DTU025	UBA1393	UBA1393 sp002305255	109	Yes
asm_GCA_002305265_1.LargeContigs	57.29	0	1570524	22	139068	35.5	No	0	0	0	Medium-Quality	MAG	Bacteria	Bacteroidota	Bacteroidia	Bacteroidales	Bacteroidaceae	UBA3839	UBA3839 sp002305265	1292	Yes
asm_GCA_002305275_1.LargeContigs	90.21	0.95	1888294	48	67724	39.3	Yes	1	0	0	High-Quality	MAG	Bacteria	Bacteroidota	Bacteroidia	Bacteroidales	UBA932	Bact-11	Bact-11 sp002305275	1081	Yes
asm_GCA_002305315_1.LargeContigs	95.97	1.45	2817651	61	70756	40.5	No	0	0	0	High-Quality	MAG	Bacteria	Bacillota_A	Clostridia	Lachnospirales	Bianqueaceae	Faecimorpha	Faecimorpha stercoravium	180	Yes
asm_GCA_002305335_1.LargeContigs	92.71	0.56	1833410	56	58890	40.7	Yes	1	0	0	High-Quality	MAG	Bacteria	Bacillota_A	Clostridia	Oscillospirales	CAG-382	UBA1206	UBA1206 sp002305335	2204	Yes
asm_GCA_002305345_1.LargeContigs	81.82	3.64	2786785	173	25018	39.2	No	0	0	0	Medium-Quality	MAG	Bacteria	Chloroflexota	Anaerolineae	Anaerolineales	Anaerolineaceae	Flexilinea	Flexilinea flocculi	2154	Yes
asm_GCA_002305355_1.LargeContigs	93.02	0	938716	38	49837	33.8	No	0	0	1	High-Quality	MAG	Bacteria	Patescibacteria	Microgenomatia	UBA1400	PJMF01	UBA1388	UBA1388 sp002305355	364	Yes
asm_GCA_002305395_1.LargeContigs	93.02	0	647046	43	20015	35.7	Yes	2	0	0	High-Quality	MAG	Bacteria	Patescibacteria	UBA1384	UBA1384	UBA1384	UBA1384	UBA1384 sp002305395	2208	Yes
asm_GCA_002305415_1.LargeContigs	97.08	2.78	3057583	141	38636	33.1	No	0	0	1	High-Quality	MAG	Bacteria	Actinomycetota	Actinomycetia	Actinomycetales	Actinomycetaceae	UBA1383	UBA1383 sp002305415	1446	Yes
asm_GCA_002305435_1.LargeContigs	86.81	3.47	1892067	145	19194	39.3	No	0	0	0	Medium-Quality	MAG	Bacteria	Bacillota_A	Clostridia	UBA1381	UBA1381	UBA1381	UBA1381 sp002305435	1192	Yes
asm_GCA_002305445_1.LargeContigs	70.89	0	1687318	73	36463	36.5	No	0	0	0	Medium-Quality	MAG	Bacteria	Bacillota_A	Clostridia	Oscillospirales	CAG-272	UBA1380	UBA1380 sp002305445	112	Yes
asm_GCA_002305475_1.LargeContigs	97.67	2.33	942601	19	126837	37.7	No	0	0	1	High-Quality	MAG	Bacteria	Patescibacteria	WWE3	UBA101185	UBA10185	UBA1379	UBA1379 sp002305475	76	Yes
asm_GCA_002305495_1.LargeContigs	98.08	0.59	2561623	56	68370	35.5	No	0	0	1	High-Quality	MAG	Bacteria	Desulfobacterota	Desulfovibrionia	Desulfovibrionales	Desulfovibrionaceae	Desulfovibrio	Desulfovibrio legallii_A	1433	Yes
asm_GCA_002305505_1.LargeContigs	80.12	0.09	2740146	83	46799	39.4	No	0	0	0	Medium-Quality	MAG	Bacteria	Bacteroidota	Bacteroidia	Bacteroidales	Bacteroidaceae	Prevotella	Prevotella sp002305505	2464	Yes
asm_GCA_002305535_1.LargeContigs	90.01	0.72	2317525	126	27840	39.4	No	0	0	0	High-Quality	MAG	Bacteria	Bacillota_B	Syntrophomonadia	Syntrophomonadales	Syntrophomonadaceae	DTU018	DTU018 sp002305535	2072	Yes
asm_GCA_002305545_1.LargeContigs	92.05	1.43	2151692	23	161761	39.2	No	0	1	0	High-Quality	MAG	Bacteria	Bacteroidota	Bacteroidia	Bacteroidales	UBA932	DMER64	DMER64 sp002305545	1318	Yes
asm_GCA_002305575_1.LargeContigs	94.02	5.52	2343266	48	62822	37.2	No	0	0	0	Medium-Quality	MAG	Bacteria	Bacillota_A	Clostridia	Oscillospirales	Acutalibacteraceae	UBA1417	UBA1417 sp002305575	352	Yes
asm_GCA_002305585_1.LargeContigs	89.76	0	1683311	60	57531	36.8	No	0	0	0	Medium-Quality	MAG	Bacteria	Actinomycetota	Coriobacteriia	Coriobacteriales	UBA8131	UBA1419	UBA1419 sp002305585	2357	Yes
asm_GCA_002305615_1.LargeContigs	62.56	0.68	1833442	123	22127	39.5	No	0	0	1	Medium-Quality	MAG	Bacteria	Verrucomicrobiota	Verrucomicrobiae	Pedosphaerales	UBA1412	UBA1412	UBA1412 sp002305615	2494	Yes
asm_GCA_002305635_1.LargeContigs	77.88	0.91	1651866	31	95072	36.7	No	0	0	0	Medium-Quality	MAG	Bacteria	Chloroflexota	Anaerolineae	Anaerolineales	Anaerolineaceae	T78	T78 sp002305635	607	Yes
asm_GCA_002305655_1.LargeContigs	84.46	2.06	4205380	137	46793	39.9	No	0	0	1	Medium-Quality	MAG	Bacteria	Verrucomicrobiota	Lentisphaeria	UBA1407	UBA1407	UBA1407	UBA1407 sp002305655	1522	Yes
asm_GCA_002305675_1.LargeContigs	97.67	0	936345	7	249005	37.7	No	0	0	1	High-Quality	MAG	Bacteria	Patescibacteria	Microgenomatia	UBA1406	UBA1406	UBA1406	UBA1406 sp002305675	2060	Yes
asm_GCA_002305685_1.LargeContigs	87.92	0	2612635	71	59338	40.4	No	0	0	1	Medium-Quality	MAG	Bacteria	Bacillota_A	Clostridia	Oscillospirales	Ruminococcaceae	UBA1405	UBA1405 sp002305685	1165	Yes
asm_GCA_002305715_1.LargeContigs	97.61	0	2756763	74	65807	38.1	No	0	0	1	High-Quality	MAG	Bacteria	Bacteroidota	Bacteroidia	Bacteroidales	Dysgonomonadaceae	Proteiniphilum	Proteiniphilum sp002305715	689	Yes
asm_GCA_002305725_1.LargeContigs	92.28	0	2355996	60	70720	39.9	No	0	0	1	High-Quality	MAG	Bacteria	Bacillota_A	Clostridia	Oscillospirales	Ruminococcaceae	UBA1394	UBA1394 sp002305725	2374	Yes
asm_GCA_002305755_1.LargeContigs	84.15	2	2028704	72	49421	38.9	No	0	0	0	Medium-Quality	MAG	Bacteria	Bacillota_A	Clostridia	Christensenellales	CAG-74	UBA1038	UBA1038 sp002305755	705	Yes
asm_GCA_002305765_1.LargeContigs	88.17	2.9	3568523	121	51342	40.5	Yes	1	0	1	Medium-Quality	MAG	Bacteria	Desulfobacterota_G	Syntrophorhabdia	Syntrophorhabdales	Syntrophorhabdaceae	Delta-02	Delta-02 sp002305765	1822	Yes
asm_GCA_002305795_1.LargeContigs	76.51	0	1505340	23	104186	40.1	No	0	0	0	Medium-Quality	MAG	Bacteria	Bacillota_A	Clostridia	Oscillospirales	Ruminococcaceae	Egerieicola	Egerieicola faecale	1166	Yes
asm_GCA_002305805_1.LargeContigs	98.92	0	1994908	23	138878	36.9	No	0	0	0	High-Quality	MAG	Bacteria	Actinomycetota	Coriobacteriia	Coriobacteriales	Atopobiaceae	Thermophilibacter	Thermophilibacter excrementavium	581	Yes
asm_GCA_002305915_1.LargeContigs	75.44	0	2434819	70	66186	41.6	No	0	0	1	Medium-Quality	MAG	Bacteria	Bacillota_B	Desulfotomaculia	Desulfotomaculales	Pelotomaculaceae	DTU098	DTU098 sp002305915	960	Yes
asm_GCA_002305925_1.LargeContigs	97.67	0	1130278	19	140675	36.4	Yes	1	2	0	High-Quality	MAG	Bacteria	Patescibacteria	Gracilibacteria	UBA1369	UBA1369	UBA1369	UBA1369 sp002305925	402	Yes
asm_GCA_002305955_1.LargeContigs	98.12	0.47	2483455	84	55952	41.7	No	0	0	1	High-Quality	MAG	Bacteria	Thermotogota	Thermotogae	Petrotogales	Kosmotogaceae	Mesotoga	Mesotoga sp002305955	729	Yes
asm_GCA_002305965_1.LargeContigs	85.74	0.85	2004244	86	47401	39.3	No	0	0	0	Medium-Quality	MAG	Bacteria	Bacillota_B	Syntrophomonadia	Syntrophomonadales	Syntrophomonadaceae	UBA1368	UBA1368 sp002305965	22	Yes
asm_GCA_002305995_1.LargeContigs	96.77	0	2178534	19	234829	38.1	No	0	2	2	High-Quality	MAG	Bacteria	Actinomycetota	Coriobacteriia	Coriobacteriales	Atopobiaceae	UBA1367	UBA1367 sp002305995	582	Yes
asm_GCA_002306005_1.LargeContigs	77.05	0	1778978	133	19510	36.6	No	0	0	0	Medium-Quality	MAG	Bacteria	Bacillota_A	Clostridia	Oscillospirales	Ruminococcaceae	UBA1366	UBA1366 sp002306005	2375	Yes
asm_GCA_002306015_1.LargeContigs	94.25	0	2449870	107	33088	39.2	No	0	0	0	High-Quality	MAG	Bacteria	Spirochaetota	Spirochaetia	Sphaerochaetales	Sphaerochaetaceae	Spiro-02	Spiro-02 sp001604275	865	Yes
asm_GCA_002306055_1.LargeContigs	92.73	2	2157371	49	68638	36.4	No	0	0	0	High-Quality	MAG	Bacteria	Chloroflexota	Anaerolineae	Anaerolineales	Anaerolineaceae	T78	T78 sp002306055	673	Yes
asm_GCA_002306075_1.LargeContigs	93.07	0	1522848	78	26954	41.8	No	0	0	4	High-Quality	MAG	Bacteria	Synergistota	Synergistia	Synergistales	Synergistaceae	Syner-03	Syner-03 sp002306075	762	Yes
asm_GCA_002306085_1.LargeContigs	95.35	0	911010	24	51399	40.5	Yes	1	1	0	High-Quality	MAG	Bacteria	Patescibacteria	Paceibacteria	Moranbacterales	GWC2-37-73	UBA1362	UBA1362 sp002306085	237	Yes
asm_GCA_002306095_1.LargeContigs	72.09	0	439456	40	16201	43.9	Yes	1	1	1	Medium-Quality	MAG	Bacteria	Patescibacteria	Paceibacteria	Paceibacterales	UBA5633	UBA2558	UBA2558 sp002340425	2206	Yes
asm_GCA_002306295_1.LargeContigs	60.47	2.33	675389	28	48268	39.2	Yes	1	0	1	Medium-Quality	MAG	Bacteria	Patescibacteria	Microgenomatia	UBA12405	UBA12405	UBA1372	UBA1372 sp002306295	54	Yes
asm_GCA_002306315_1.LargeContigs	100	0	822578	35	37369	34.2	Yes	2	2	1	High-Quality	MAG	Bacteria	Patescibacteria	Microgenomatia	UBA1400	PJMF01	UBA1370	UBA1370 sp002306315	1247	Yes
asm_GCA_002306335_1.LargeContigs	95.51	0	1069851	42	35873	34.1	Yes	1	2	1	High-Quality	MAG	Bacteria	Bacillota	Bacilli	RFN20	CAG-826	UBA1361	UBA1361 sp002306335	2341	Yes
asm_GCA_002306345_1.LargeContigs	95.35	2.33	759019	11	207631	33.3	Yes	1	1	0	High-Quality	MAG	Bacteria	Patescibacteria	Microgenomatia	UBA1400	PJMF01	UBA1364	UBA1364 sp002306345	73	Yes
asm_GCA_002306375_1.LargeContigs	82.54	0.02	2163218	120	32172	37	No	0	0	1	Medium-Quality	MAG	Bacteria	Bacillota_A	Clostridia	Oscillospirales	Ruminococcaceae	Gemmiger	Gemmiger sp002306375	1516	Yes
asm_GCA_002306385_1.LargeContigs	100	0	699865	5	141056	37.8	Yes	1	1	1	High-Quality	MAG	Bacteria	Patescibacteria	ABY1	BM507	UBA917	UBA1359	UBA1359 sp002306385	160	Yes
asm_GCA_002307975_1.LargeContigs	98.02	0	3000624	33	171371	35.3	No	0	0	2	High-Quality	MAG	Bacteria	Pseudomonadota	Gammaproteobacteria	Pseudomonadales	Moraxellaceae	Acinetobacter	Acinetobacter radioresistens	464	No
asm_GCA_002320955_1.LargeContigs	92.43	0.37	2802364	59	97865	35.2	No	0	0	0	High-Quality	MAG	Bacteria	Pseudomonadota	Gammaproteobacteria	Pseudomonadales	Moraxellaceae	Acinetobacter	Acinetobacter radioresistens	464	No
asm_GCA_002325085_1.LargeContigs	96.51	0.27	2636394	125	34482	35.4	No	0	0	1	High-Quality	MAG	Bacteria	Pseudomonadota	Gammaproteobacteria	Pseudomonadales	Moraxellaceae	Acinetobacter	Acinetobacter radioresistens	464	No
asm_GCA_002327225_1.LargeContigs	58.77	1.75	2455673	214	16589	38.5	No	0	0	2	Medium-Quality	MAG	Bacteria	Desulfobacterota	Desulfobulbia	Desulfobulbales	Desulfocapsaceae	UBA2270	UBA2270 sp002327225	238	Yes
asm_GCA_002327235_1.LargeContigs	90.03	0	2210221	55	70643	39	No	0	0	0	High-Quality	MAG	Bacteria	Bacillota_B	Desulfotomaculia	Desulfotomaculales	Nap2-2B	SCADC1-2-3	SCADC1-2-3 sp002327235	535	Yes
asm_GCA_002327245_1.LargeContigs	77.48	0	1579256	100	24566	41.8	No	0	0	1	Medium-Quality	MAG	Bacteria	Bacillota_A	Clostridia	Tissierellales	Tissierellaceae_C	Gudongella	Gudongella oleilytica	1218	No
asm_GCA_002327255_1.LargeContigs	89.56	2.75	4200013	259	25707	36.7	No	0	0	1	Medium-Quality	MAG	Bacteria	KSB1	UBA2214	UBA2214	UBA2214	UBA2214	UBA2214 sp002327255	1317	Yes
asm_GCA_002327305_1.LargeContigs	91.99	1.71	3646212	121	47853	37.9	No	0	0	2	High-Quality	MAG	Bacteria	Acidobacteriota	Thermoanaerobaculia	UBA2201	UBA2201	UBA2201	UBA2201 sp002327305	880	No
asm_GCA_002327315_1.LargeContigs	91.29	3.71	3656972	227	25278	39.5	No	0	0	0	High-Quality	MAG	Bacteria	Desulfobacterota	Syntrophia	Syntrophales	UBA4778	UBA2192	UBA2192 sp002327315	1814	Yes
asm_GCA_002327325_1.LargeContigs	79.94	1.94	2058525	162	23114	37	No	0	0	1	Medium-Quality	MAG	Bacteria	Desulfobacterota_F	Desulfuromonadia	Desulfuromonadales	UBA2197	UBA2197	UBA2197 sp002424625	1233	No
asm_GCA_002327335_1.LargeContigs	83.72	0	748501	99	10488	42.7	No	0	1	1	Medium-Quality	MAG	Bacteria	Patescibacteria	Paceibacteria	Moranbacterales	UBA2193	UBA2193	UBA2193 sp002327335	2155	Yes
asm_GCA_002327385_1.LargeContigs	80.36	0	1086095	27	63331	41.6	Yes	2	1	3	Medium-Quality	MAG	Bacteria	Caldisericota	Caldisericia	Caldisericales	Caldisericaceae	UBA4770	UBA4770 sp002403335	2176	No
asm_GCA_002327405_1.LargeContigs	86.33	2.65	2513969	189	20411	35.7	No	0	0	1	Medium-Quality	MAG	Bacteria	Pseudomonadota	Gammaproteobacteria	Burkholderiales	Thiobacillaceae	UBA6918	UBA6918 sp002327405	1508	Yes
asm_GCA_002327415_1.LargeContigs	76.96	2.58	1748770	189	11724	38.9	No	0	0	2	Medium-Quality	MAG	Bacteria	Desulfobacterota	Syntrophia	Syntrophales	Smithellaceae	Smithella	Smithella sp002327415	1830	Yes
asm_GCA_002327445_1.LargeContigs	96.13	1.94	3857986	47	117314	37.3	Yes	1	1	1	High-Quality	MAG	Bacteria	Desulfobacterota	Desulfobacteria	Desulfobacterales	UBA2174	UBA2174	UBA2174 sp002327445	1513	Yes
asm_GCA_002327465_1.LargeContigs	98.78	0.61	2013458	15	169074	35.9	No	0	0	1	High-Quality	MAG	Bacteria	Campylobacterota	Campylobacteria	Campylobacterales	Sulfurimonadaceae	Sulfuricurvum	Sulfuricurvum sp002327465	2484	Yes
asm_GCA_002327475_1.LargeContigs	73.29	0	2099616	259	10188	37.9	No	0	0	2	Medium-Quality	MAG	Bacteria	Krumholzibacteriota	Krumholzibacteria	Krumholzibacteriales	Krumholzibacteriaceae	SSS58A	SSS58A sp002403295	1427	Yes
asm_GCA_002327745_1.LargeContigs	50	0	1501371	117	16948	37.1	No	0	0	2	Medium-Quality	MAG	Bacteria	Edwardsbacteria	AC1	AC1	UBA2255	UBA2255	UBA2255 sp002347565	879	Yes
asm_GCA_002327765_1.LargeContigs	86.81	3.41	2775661	142	31237	39.5	No	0	0	2	Medium-Quality	MAG	Bacteria	Desulfobacterota_E	Deferrimicrobia	Deferrimicrobiales	Deferrimicrobiaceae	UBA2219	UBA2219 sp002327765	841	Yes
asm_GCA_002327785_1.LargeContigs	89.25	5.38	6321081	342	29767	39.2	No	0	0	1	Medium-Quality	MAG	Bacteria	Planctomycetota	Phycisphaerae	Sedimentisphaerales	SG8-4	PLanc-01	PLanc-01 sp002327785	830	Yes
asm_GCA_002327805_1.LargeContigs	90.11	2.2	2341532	28	163879	37	No	0	0	1	High-Quality	MAG	Bacteria	Marinisomatota	UBA2242	UBA2242	UBA2242	UBA2242	UBA2242 sp002347855	1987	Yes
asm_GCA_002327825_1.LargeContigs	74.98	0.61	1517457	10	204756	36.6	No	0	0	2	Medium-Quality	MAG	Bacteria	Campylobacterota	Campylobacteria	Campylobacterales	Sulfurovaceae	Sulfurovum	Sulfurovum sp002742845	2239	No
asm_GCA_002327845_1.LargeContigs	95.35	2.33	526355	11	145980	43.2	Yes	2	0	1	High-Quality	MAG	Bacteria	Patescibacteria	Paceibacteria	Paceibacterales	UBA5633	UBA2211	UBA2211 sp002327845	2203	No
asm_GCA_002327865_1.LargeContigs	89.65	2.58	2207031	60	71064	41.9	No	0	0	1	Medium-Quality	MAG	Bacteria	Desulfobacterota	Syntrophia	Syntrophales	UBA2210	UBA2210	UBA2210 sp002327865	1804	Yes
asm_GCA_002327885_1.LargeContigs	87.94	3.23	3576697	248	20392	44	No	0	0	3	Medium-Quality	MAG	Bacteria	Desulfobacterota_F	BSN033	BSN033	UBA1163	UBA1163	UBA1163 sp002327885	909	Yes
asm_GCA_002327905_1.LargeContigs	92.31	0	2035886	123	24685	39.8	No	0	0	0	High-Quality	MAG	Bacteria	WOR-3	32-111	32-111	32-111	UBA2202	UBA2202 sp002327905	82	Yes
asm_GCA_002327925_1.LargeContigs	77.98	0.18	2805782	54	82841	36.8	No	0	0	2	Medium-Quality	MAG	Bacteria	Chloroflexota	Anaerolineae	UBA2200	UBA2200	UBA2200	UBA2200 sp002327925	1892	Yes
asm_GCA_002327945_1.LargeContigs	72.68	2.28	2403546	265	12477	33.8	No	0	0	1	Medium-Quality	MAG	Bacteria	Pseudomonadota	Gammaproteobacteria	Burkholderiales	Burkholderiaceae_B	Acidovorax	Acidovorax delafieldii_C	1574	Yes
asm_GCA_002327965_1.LargeContigs	76.27	0.85	2513533	130	32986	38.5	No	0	0	2	Medium-Quality	MAG	Bacteria	Acidobacteriota	Aminicenantia	UBA2199	UBA2199	UBA2199	UBA2199 sp002327965	886	Yes
asm_GCA_002327985_1.LargeContigs	93.23	1.29	3982062	186	43338	43.6	No	0	0	1	High-Quality	MAG	Bacteria	Desulfobacterota_F	BSN033	BSN033	UBA1163	UBA1163	UBA1163 sp002327985	908	Yes
asm_GCA_002328025_1.LargeContigs	95.35	0	754364	18	81408	37.7	Yes	1	1	1	High-Quality	MAG	Bacteria	Patescibacteria	ABY1	UBA2196	UBA2196	UBA2196	UBA2196 sp002328025	2061	Yes
asm_GCA_002328035_1.LargeContigs	95.81	0.22	3161092	67	86368	37.8	No	0	0	0	High-Quality	MAG	Bacteria	Desulfobacterota_F	Desulfuromonadia	Geobacterales	Pseudopelobacteraceae	Trichlorobacter	Trichlorobacter sp002328035	2446	Yes
asm_GCA_002328065_1.LargeContigs	76.9	2.38	3022641	20	189561	38.5	Yes	1	0	0	Medium-Quality	MAG	Bacteria	Bacteroidota	Bacteroidia	Bacteroidales	VadinHA17	SR-FBR-E99	SR-FBR-E99 sp002403305	95	No
asm_GCA_002328075_1.LargeContigs	89.55	4.73	4656008	62	128475	36.8	Yes	1	0	9	Medium-Quality	MAG	Bacteria	Chloroflexota	Anaerolineae	Promineofilales	UBA4811	UBA4811	UBA4811 sp002328075	1186	Yes
asm_GCA_002328085_1.LargeContigs	100	2.55	3189340	7	792978	33.8	No	0	0	3	High-Quality	MAG	Bacteria	Pseudomonadota	Gammaproteobacteria	Burkholderiales	Thiobacillaceae	Thiobacillus	Thiobacillus denitrificans_E	1505	No
asm_GCA_002328145_1.LargeContigs	93.23	1.94	1814167	87	29758	40.7	Yes	1	0	0	High-Quality	MAG	Bacteria	Desulfobacterota	Syntrophia	Syntrophales	UBA4767	UBA4767	UBA4767 sp002403385	1837	No
asm_GCA_002328435_1.LargeContigs	81.67	2.42	2761220	281	13474	40.9	No	0	0	1	Medium-Quality	MAG	Bacteria	Bacillota_A	Clostridia	Clostridiales	Clostridiaceae	Youngiibacter	Youngiibacter sp002428605	2074	No
asm_GCA_002328465_1.LargeContigs	88.37	0	736233	78	13036	41.2	No	0	0	1	Medium-Quality	MAG	Bacteria	Patescibacteria	Dojkabacteria	SC72	SC72	UBA2259	UBA2259 sp002328465	2201	Yes
asm_GCA_002328485_1.LargeContigs	77.54	1.68	2185075	89	36063	40.9	Yes	1	0	1	Medium-Quality	MAG	Bacteria	Desulfobacterota_G	Syntrophorhabdia	Syntrophorhabdales	WCHB1-27	WCHB1-27	WCHB1-27 sp002328485	1809	Yes
asm_GCA_002328495_1.LargeContigs	97.82	0.38	2418939	13	285205	36.6	No	0	0	1	High-Quality	MAG	Bacteria	Campylobacterota	Campylobacteria	Campylobacterales	Sulfurospirillaceae	Sulfurospirillum	Sulfurospirillum sp002328495	2220	Yes
asm_GCA_002328515_1.LargeContigs	93.61	0.94	1827033	97	31045	36.6	Yes	1	0	1	High-Quality	MAG	Bacteria	Bacillota	Bacilli	Erysipelotrichales	Erysipelotrichaceae	UBA2212	UBA2212 sp002402585	2366	No
asm_GCA_002328545_1.LargeContigs	86.16	7.1	2069197	146	21769	41	No	0	0	1	Medium-Quality	MAG	Bacteria	Desulfobacterota	Syntrophia	Syntrophales	UBA4778	UBA2207	UBA2207 sp002418885	1812	No
asm_GCA_002328585_1.LargeContigs	92.07	2.25	3041216	75	80144	37.4	Yes	1	0	1	High-Quality	MAG	Bacteria	Spirochaetota	UBA4802	UBA4802	UB4802	UBA4802	UBA4802 sp002328585	2178	Yes
asm_GCA_002328605_1.LargeContigs	57.63	0	828810	44	65078	44.1	No	0	0	1	Medium-Quality	MAG	Bacteria	Synergistota	Synergistia	Synergistales	Thermovirgaceae	UBA4066	UBA4066 sp002383685	650	No
asm_GCA_002328625_1.LargeContigs	86.37	5.79	3900182	396	13757	41	No	0	0	1	Medium-Quality	MAG	Bacteria	Bacteroidota	Bacteroidia	Bacteroidales	VadinHA17	LD21	LD21 sp002328625	108	Yes
asm_GCA_002328635_1.LargeContigs	83.18	5.45	2203857	78	48611	36.7	No	0	0	1	Medium-Quality	MAG	Bacteria	Chloroflexota	Anaerolineae	Anaerolineales	Anaerolineaceae	UBA4782	UBA4782 sp002403095	611	No
asm_GCA_002328665_1.LargeContigs	95.45	2.73	2198006	132	25207	41.4	No	0	0	1	High-Quality	MAG	Bacteria	Nitrospirota	Thermodesulfovibrionia	Thermodesulfovibrionales	SM23-35	UBA2194	UBA2194 sp002328665	1808	Yes
asm_GCA_002328685_1.LargeContigs	90.49	3.42	2374313	108	33156	39.6	No	0	0	2	High-Quality	MAG	Bacteria	Acidobacteriota	Aminicenantia	Aminicenantales	Saccharicenantaceae	Saccharicenans	Saccharicenans sp002441005	1171	Yes
asm_GCA_002328705_1.LargeContigs	73.73	0	930847	36	41154	38.4	Yes	1	1	1	Medium-Quality	MAG	Bacteria	Bipolaricaulota	Bipolaricaulia	Bipolaricaulales	Bipolaricaulaceae	Bipolaricaulis	Bipolaricaulis anaerobius	901	No
asm_GCA_002328725_1.LargeContigs	69.74	3.23	2955723	297	13245	39.7	No	0	0	4	Medium-Quality	MAG	Bacteria	Desulfobacterota	Syntrophia	Syntrophales	UBA2185	UBA2185	UBA2185 sp003508565	1823	Yes
asm_GCA_002328745_1.LargeContigs	92.81	1.39	2054605	40	82329	35.1	No	0	0	4	High-Quality	MAG	Bacteria	Actinomycetota	Coriobacteriia	OPB41	UBA2279	UBA2184	UBA2184 sp002328745	1442	Yes
asm_GCA_002328755_1.LargeContigs	75.86	1.72	2320177	106	39754	33.7	No	0	0	4	Medium-Quality	MAG	Bacteria	Pseudomonadota	Gammaproteobacteria	Burkholderiales	Rhodocyclaceae	Rugosibacter	Rugosibacter sp002424865	1571	No
asm_GCA_002328785_1.LargeContigs	60.91	0.91	1924920	35	65845	36.6	Yes	1	0	3	Medium-Quality	MAG	Bacteria	Chloroflexota	Anaerolineae	Anaerolineales	Anaerolineaceae	Brevefilum	Brevefilum sp002403205	818	No
asm_GCA_002329165_1.LargeContigs	73.01	0.75	2382009	205	15928	39.1	No	0	0	1	Medium-Quality	MAG	Bacteria	Bacteroidota	Bacteroidia	Bacteroidales	Bacteroidaceae	Phocaeicola	Phocaeicola sp002161765	2163	Yes
asm_GCA_002329205_1.LargeContigs	95.35	0	1427868	2	940728	36.1	Yes	2	1	1	High-Quality	MAG	Bacteria	Patescibacteria	Microgenomatia	UBA1406	GWC2-37-13	UBA1450	UBA1450 sp002329205	2439	Yes
asm_GCA_002329225_1.LargeContigs	63.78	1.01	1607691	177	11115	39.1	No	0	0	0	Medium-Quality	MAG	Bacteria	Bacillota_A	Clostridia	Oscillospirales	Acutalibacteraceae	UBA1447	UBA1447 sp002329225	360	Yes
asm_GCA_002329245_1.LargeContigs	86.08	2.57	2340272	232	14250	39.6	No	0	0	0	Medium-Quality	MAG	Bacteria	Bacillota_A	Clostridia	Oscillospirales	Oscillospiraceae	UBA1446	UBA1446 sp002329245	1147	Yes
asm_GCA_002329255_1.LargeContigs	81.4	0	409872	19	37499	39.5	Yes	1	0	1	Medium-Quality	MAG	Bacteria	Patescibacteria	Paceibacteria	Paceibacterales	UBA1441	UBA1441	UBA1441 sp002329255	2090	Yes
asm_GCA_002329285_1.LargeContigs	87.63	1.57	1750439	122	22355	39.2	No	0	0	0	Medium-Quality	MAG	Bacteria	Bacillota_A	Clostridia	Oscillospirales	Acutalibacteraceae	Eubacterium_R	Eubacterium_R sp002329285	2407	Yes
asm_GCA_002329295_1.LargeContigs	95.02	0.04	1605154	27	170024	37.2	No	0	0	2	High-Quality	MAG	Bacteria	Bacillota_A	Clostridia	Eubacteriales	UBA1433	UBA1433	UBA1433 sp002329295	1322	Yes
asm_GCA_002329325_1.LargeContigs	95.28	4.67	3282820	95	47900	36	No	0	0	1	High-Quality	MAG	Bacteria	Chloroflexota	Anaerolineae	UBA1429	UBA1429	UBA1429	UBA1429 sp002329325	1526	Yes
asm_GCA_002329335_1.LargeContigs	90.66	2.55	2577954	76	63612	37.5	No	0	0	1	High-Quality	MAG	Bacteria	Bacillota_A	Clostridia	Christensenellales	UBA1750	UBA1428	UBA1428 sp002329335	629	Yes
asm_GCA_002329365_1.LargeContigs	86.54	0.34	2288288	62	55574	40.8	Yes	1	0	3	Medium-Quality	MAG	Bacteria	Bacillota_A	Clostridia	Oscillospirales	Acutalibacteraceae	UBA1425	UBA1425 sp002329365	390	Yes
asm_GCA_002329385_1.LargeContigs	88.37	0	799308	48	26623	40.2	No	0	2	1	Medium-Quality	MAG	Bacteria	Patescibacteria	Microgenomatia	UBA12405	UBA12405	UBA1435	UBA1435 sp002329385	51	Yes
asm_GCA_002329395_1.LargeContigs	90.81	1.12	1455743	109	15797	35.1	No	0	0	0	High-Quality	MAG	Bacteria	Elusimicrobiota	Elusimicrobia	Elusimicrobiales	Elusimicrobiaceae	UBA1436	UBA1436 sp002329395	1988	Yes
asm_GCA_002329405_1.LargeContigs	73.89	0.67	2331951	227	15397	40.9	No	0	0	2	Medium-Quality	MAG	Bacteria	Bacillota_A	Clostridia	Oscillospirales	Ruminococcaceae	Faecivivens	Faecivivens sp002329405	1167	Yes
asm_GCA_002329445_1.LargeContigs	78.92	0.21	3880862	464	10824	39	No	0	0	1	Medium-Quality	MAG	Bacteria	Eremiobacterota	Xenobia	Xenobiales	Xenobiaceae	Xenobium	Xenobium purgamenti	1130	Yes
asm_GCA_002329465_1.LargeContigs	90.7	0	594111	11	67450	38.9	No	0	0	1	High-Quality	MAG	Bacteria	Patescibacteria	Microgenomatia	GWA2-44-7	UBA8517	UBA1430	UBA1430 sp002329465	1068	Yes
asm_GCA_002329485_1.LargeContigs	97.33	0	1501428	43	58161	37.3	No	0	0	0	High-Quality	MAG	Bacteria	Bacillota	Bacilli	ML615J-28	CAG-313	UBA1427	UBA1427 sp002329485	2373	Yes
asm_GCA_002329495_1.LargeContigs	86.56	4.72	2279885	259	11845	40.9	No	0	0	1	Medium-Quality	MAG	Bacteria	Bacillota_B	Syntrophomonadia	Syntrophomonadales	DTU052	DTU052	DTU052 sp002329495	997	Yes
asm_GCA_002329525_1.LargeContigs	78.97	1.92	2870116	275	14311	37.4	No	0	0	1	Medium-Quality	MAG	Bacteria	Bacillota_C	Negativicutes	UBA1444	UBA1444	UBA1444	UBA1444 sp002329525	1319	Yes
asm_GCA_002329545_1.LargeContigs	87.63	0.6	1715667	105	25195	39.5	No	0	0	1	Medium-Quality	MAG	Bacteria	Omnitrophota	Omnitrophia	Omnitrophales	Aquincolibacteriaceae	UBA1443	UBA1443 sp002329545	1164	Yes
asm_GCA_002329565_1.LargeContigs	95.27	1.68	1480088	68	39190	38.4	No	0	0	1	High-Quality	MAG	Bacteria	Bacillota_A	Clostridia	Peptostreptococcales	Anaerovoracaceae	UBA1440	UBA1440 sp002329565	1022	Yes
asm_GCA_002329575_1.LargeContigs	79.62	0	1601338	126	18723	35.2	No	0	0	0	Medium-Quality	MAG	Bacteria	Pseudomonadota	Gammaproteobacteria	Burkholderiales	Burkholderiaceae_A	Aphodousia	Aphodousia sp002329575	1562	Yes
asm_GCA_002329605_1.LargeContigs	84.97	4.7	2414713	211	16271	38.8	No	0	0	0	Medium-Quality	MAG	Bacteria	UBA1439	UBA1439	UBA1439	UBA1439	UBA1439	UBA1439 sp002329605	1019	Yes
asm_GCA_002329625_1.LargeContigs	74.61	2	2003742	151	18340	38.9	No	0	0	0	Medium-Quality	MAG	Bacteria	Chloroflexota	Anaerolineae	Anaerolineales	Anaerolineaceae	Flexilinea	Flexilinea sp002329625	366	Yes
asm_GCA_002329645_1.LargeContigs	94.22	4.64	2907130	115	37887	40	No	0	0	1	High-Quality	MAG	Bacteria	Bacillota_A	Clostridia	Lachnospirales	Lachnospiraceae	Mobilitalea	Mobilitalea sp002329645	823	Yes
asm_GCA_002329665_1.LargeContigs	71.48	1.61	1532835	78	26634	39.5	No	0	0	0	Medium-Quality	MAG	Bacteria	Bacillota_A	Clostridia	Christensenellales	UBA1431	UBA1431	UBA1431 sp002329665	756	Yes
asm_GCA_002329675_1.LargeContigs	81.74	0.71	2228566	236	12589	40.6	No	0	0	0	Medium-Quality	MAG	Bacteria	Bacillota_A	Clostridia	Peptostreptococcales	Anaerovoracaceae	UBA1426	UBA1426 sp002329675	1021	Yes
asm_GCA_002329705_1.LargeContigs	91.01	0	983821	76	20309	36.9	No	0	0	0	High-Quality	MAG	Bacteria	Bacillota	Bacilli	RFN20	CAG-826	UBA1424	UBA1424 sp002329705	1890	Yes
asm_GCA_002331905_1.LargeContigs	81.07	0.27	2434246	152	21911	35.2	No	0	0	0	Medium-Quality	MAG	Bacteria	Pseudomonadota	Gammaproteobacteria	Pseudomonadales	Moraxellaceae	Acinetobacter	Acinetobacter radioresistens	464	No
asm_GCA_002335355_1.LargeContigs	95.35	2.33	1192622	113	14695	35.5	No	0	0	1	High-Quality	MAG	Bacteria	Patescibacteria	Microgenomatia	UBA1400	UBA1449	UBA1449	UBA1449 sp002335355	452	Yes
asm_GCA_002335385_1.LargeContigs	87.92	1.71	2953209	72	63971	38.6	No	0	0	1	Medium-Quality	MAG	Bacteria	Acidobacteriota	Aminicenantia	UBA2199	UBA2199	UBA2199	UBA2199 sp002335385	886	Yes
asm_GCA_002338095_1.LargeContigs	92.37	0	1539412	108	23850	42.3	No	0	0	1	High-Quality	MAG	Bacteria	Synergistota	Synergistia	Synergistales	Thermovirgaceae	UBA1876	UBA1876 sp003446665	639	Yes
asm_GCA_002338125_1.LargeContigs	93.02	0	621413	16	60026	38.5	No	0	3	2	High-Quality	MAG	Bacteria	Patescibacteria	CPR2	UBA1875	UBA1875	UBA1875	UBA1875 sp002338125	2284	Yes
asm_GCA_002338145_1.LargeContigs	93.91	2.59	2047374	100	41048	40.3	No	0	0	2	High-Quality	MAG	Bacteria	Deferribacterota	Deferribacteres	Deferribacterales	Flexistipitaceae	Flexistipes	Flexistipes sp002338145	2279	Yes
asm_GCA_002343685_1.LargeContigs	90.53	0.48	3203029	44	143150	34	No	0	0	0	High-Quality	MAG	Bacteria	Pseudomonadota	Gammaproteobacteria	Burkholderiales	Thiobacillaceae	Thiobacillus	Thiobacillus denitrificans_A	1506	Yes
asm_GCA_002347965_1.LargeContigs	89.54	0.81	1890242	59	53435	40.7	No	0	0	1	Medium-Quality	MAG	Bacteria	UBA2233	UBA2233	UBA2233	UBA2233	UBA2233	UBA2233 sp002347965	578	Yes
asm_GCA_002348005_1.LargeContigs	53.43	0	2399408	262	12617	37.6	No	0	0	2	Medium-Quality	MAG	Bacteria	Desulfobacterota	Desulfobacteria	Desulfobacterales	Desulfosarcinaceae	UBA2230	UBA2230 sp002348005	1520	Yes
asm_GCA_002348025_1.LargeContigs	68.36	0.73	1939582	218	11895	38.3	No	0	0	2	Medium-Quality	MAG	Bacteria	Desulfobacterota	Desulfobulbia	Desulfobulbales	Desulfurivibrionaceae	UBA2262	UBA2262 sp002347185	1421	Yes
asm_GCA_002348045_1.LargeContigs	88.23	4.77	3612627	322	17846	36.8	No	0	0	0	Medium-Quality	MAG	Bacteria	Chloroflexota	Anaerolineae	UBA2200	UBA2200	UBA2232	UBA2232 sp002348045	433	Yes
asm_GCA_002348085_1.LargeContigs	70.21	2.25	2513022	212	18906	36.9	No	0	0	1	Medium-Quality	MAG	Bacteria	Elusimicrobiota	Elusimicrobia	Elusimicrobiales	UBA9959	UBA2231	UBA2231 sp003500765	1289	Yes
asm_GCA_002348095_1.LargeContigs	99.69	2.34	2001606	71	41921	37.7	No	0	0	1	High-Quality	MAG	Bacteria	Bacillota	Bacilli	Erysipelotrichales	Erysipelotrichaceae	UBA2227	UBA2227 sp002348095	2405	Yes
asm_GCA_002348105_1.LargeContigs	92.2	5.93	3774844	377	14292	41	No	0	0	0	Medium-Quality	MAG	Bacteria	Deferribacterota	Deferribacteres	Deferribacterales	UBA228	UBA228	UBA228 sp002402635	2445	Yes
asm_GCA_002348145_1.LargeContigs	80.35	4.4	2108099	139	21117	40.1	No	0	0	1	Medium-Quality	MAG	Bacteria	Edwardsbacteria	AC1	AC1	EtOH8	UBA2226	UBA2226 sp001777915	877	No
asm_GCA_002348185_1.LargeContigs	92.12	4.5	5071787	218	36921	37.1	No	0	0	0	High-Quality	MAG	Bacteria	Hydrogenedentota	Hydrogenedentia	Hydrogenedentiales	SLHB01	UBA2224	UBA2224 sp002348185	564	Yes
asm_GCA_002348205_1.LargeContigs	95.86	1.29	3820231	352	14228	38.6	No	0	0	1	High-Quality	MAG	Bacteria	Desulfobacterota	Desulfobacteria	Desulfobacterales	Desulfobacteraceae	Desulfobacter	Desulfobacter postgatei	430	Yes
asm_GCA_002352345_1.LargeContigs	99.06	1.05	2374728	25	137343	38.6	No	0	0	3	High-Quality	MAG	Bacteria	Pseudomonadota	Gammaproteobacteria	Methylococcales	UBA2780	UBA2780	UBA2780 sp002352345	1365	Yes
asm_GCA_002352365_1.LargeContigs	89.77	1.98	1823052	175	14838	42.4	No	0	0	1	Medium-Quality	MAG	Bacteria	Chloroflexota	Dehalococcoidia	UBA2777	UBA2777	UBA2777	UBA2777 sp002352365	30	Yes
asm_GCA_002352375_1.LargeContigs	76.05	0.8	3093659	278	16653	40.8	No	0	0	0	Medium-Quality	MAG	Bacteria	Spirochaetota	Spirochaetia	Spirochaetales_E	Spirochaetaceae_B	UBA2779	UBA2779 sp002352375	144	Yes
asm_GCA_002352385_1.LargeContigs	95.52	3.6	3932915	253	25745	37	No	0	0	0	High-Quality	MAG	Bacteria	Pseudomonadota	Gammaproteobacteria	Methylococcales	UBA2778	UBA2778	UBA2778 sp002352385	836	Yes
asm_GCA_002352425_1.LargeContigs	96.64	2.24	3197922	133	37791	35.4	No	0	0	1	High-Quality	MAG	Bacteria	Pseudomonadota	Alphaproteobacteria	Rhodobacterales	Rhodobacteraceae	Profundibacter	Profundibacter sp002352425	1261	Yes
asm_GCA_002352445_1.LargeContigs	89.47	2.68	4214536	331	21380	40.5	Yes	1	0	2	Medium-Quality	MAG	Bacteria	Desulfobacterota	Desulfobulbia	Desulfobulbales	Desulfocapsaceae	Desulfomarina	Desulfomarina sp002352445	393	Yes
asm_GCA_002352465_1.LargeContigs	93.02	0	886769	17	128607	41.5	Yes	1	2	2	High-Quality	MAG	Bacteria	Patescibacteria	Paceibacteria	Moranbacterales	UBA2193	UBA2773	UBA2773 sp002352465	2158	Yes
asm_GCA_002352485_1.LargeContigs	86.41	2.52	2481553	250	12794	41.1	No	0	0	0	Medium-Quality	MAG	Bacteria	Desulfobacterota_D	UBA1144	UBA2774	UBA2774	UBA2774	UBA2774 sp002352485	955	Yes
asm_GCA_002352545_1.LargeContigs	97.67	6.98	1201707	31	134080	40.7	Yes	1	1	1	Medium-Quality	MAG	Bacteria	Patescibacteria	Paceibacteria	Moranbacterales	DUUL01	UBA2772	UBA2772 sp002352545	2159	Yes
asm_GCA_002352555_1.LargeContigs	99.4	0	3148310	26	220241	32.8	Yes	1	1	0	High-Quality	MAG	Bacteria	Pseudomonadota	Gammaproteobacteria	Pseudomonadales	Moraxellaceae	Psychrobacter	Psychrobacter maritimus	1339	Yes
asm_GCA_002352565_1.LargeContigs	88.22	1.06	2247404	129	24457	38.8	No	0	0	1	Medium-Quality	MAG	Bacteria	Pseudomonadota	Gammaproteobacteria	UBA2770	UBA2770	UBA2770	UBA2770 sp002352565	858	Yes
asm_GCA_002352605_1.LargeContigs	89.19	0.65	3032252	196	27366	38.3	No	0	0	0	Medium-Quality	MAG	Bacteria	Desulfobacterota	Desulfobacteria	Desulfobacterales	Desulfosarcinaceae	Desulfosarcina	Desulfosarcina sp002352605	2151	Yes
asm_GCA_002352625_1.LargeContigs	84.32	0	1177748	88	17458	45.4	Yes	1	1	1	Medium-Quality	MAG	Bacteria	Chloroflexota	Dehalococcoidia	UBA3088	UBA3088	UBA3088	UBA3088 sp002367275	31	Yes
asm_GCA_002352635_1.LargeContigs	87.51	2.74	4101605	256	23230	36.8	No	0	0	0	Medium-Quality	MAG	Bacteria	Pseudomonadota	Alphaproteobacteria	Rhizobiales	Methyloligellaceae	UBA2767	UBA2767 sp002352635	1656	Yes
asm_GCA_002352645_1.LargeContigs	95.73	2.14	3778022	109	58153	37.2	Yes	1	1	1	High-Quality	MAG	Bacteria	Actinomycetota	Acidimicrobiia	UBA2766	UBA2766	UBA2766	UBA2766 sp002352645	980	Yes
asm_GCA_002352665_1.LargeContigs	97.82	4.03	3981292	155	42164	37.2	No	0	0	1	High-Quality	MAG	Bacteria	Bacteroidota	Bacteroidia	Flavobacteriales	Flavobacteriaceae	Aureibaculum	Aureibaculum sp002352665	2311	Yes
asm_GCA_002352935_1.LargeContigs	85.94	0.85	1579730	103	24250	42.4	No	0	0	3	Medium-Quality	MAG	Bacteria	Bacillota_B	Moorellia	UBA1874	UBA1874	UBA1874	UBA1874 sp002352935	1028	Yes
asm_GCA_002352945_1.LargeContigs	86.19	0.9	1943928	121	24022	37.3	No	0	0	1	Medium-Quality	MAG	Bacteria	Campylobacterota	Campylobacteria	Campylobacterales	UBA1877	UBA1877	UBA1877 sp002352945	2221	Yes
asm_GCA_002353005_1.LargeContigs	97.06	1.33	5152032	39	216134	36.3	Yes	1	1	1	High-Quality	MAG	Bacteria	Pseudomonadota	Gammaproteobacteria	Pseudomonadales	Pseudomonadaceae	Pseudomonas_E	Pseudomonas_E hydrolytica	1625	Yes
asm_GCA_002367075_1.LargeContigs	91.55	0	2702979	112	34972	35.3	No	0	0	1	High-Quality	MAG	Bacteria	Pseudomonadota	Gammaproteobacteria	Pseudomonadales	Moraxellaceae	Acinetobacter	Acinetobacter radioresistens	464	No
asm_GCA_002376585_1.LargeContigs	94.9	0.37	2832504	101	42293	35.3	No	0	0	1	High-Quality	MAG	Bacteria	Pseudomonadota	Gammaproteobacteria	Pseudomonadales	Moraxellaceae	Acinetobacter	Acinetobacter radioresistens	464	No
asm_GCA_002377855_1.LargeContigs	95.14	0	3963843	44	169000	33.1	No	0	0	1	High-Quality	MAG	Bacteria	Pseudomonadota	Gammaproteobacteria	Burkholderiales	Burkholderiaceae_B	Acidovorax	Acidovorax delafieldii_A	1576	Yes
asm_GCA_002381745_1.LargeContigs	93.38	0.27	2665468	56	71418	35.2	No	0	0	1	High-Quality	MAG	Bacteria	Pseudomonadota	Gammaproteobacteria	Pseudomonadales	Moraxellaceae	Acinetobacter	Acinetobacter radioresistens	464	No
asm_GCA_002381765_1.LargeContigs	83.33	2.73	3545154	122	62309	38.7	No	0	0	0	Medium-Quality	MAG	Bacteria	Bdellovibrionota	Bacteriovoracia	Bacteriovoracales	Bacteriovoracaceae	UBA4096	UBA4096 sp002381765	2116	Yes
asm_GCA_002381805_1.LargeContigs	99.1	0	3331637	14	267135	37	No	0	0	0	High-Quality	MAG	Bacteria	Bdellovibrionota	Bdellovibrionia	Bdellovibrionales	Bdellovibrionaceae	Bdellovibrio	Bdellovibrio sp002381805	560	Yes
asm_GCA_002381825_1.LargeContigs	88.61	0.46	1462807	18	138683	38.3	No	0	0	0	Medium-Quality	MAG	Bacteria	Bacillota_B	Dehalobacteriia	UBA4068	UBA5755	UBA5755	UBA5755 sp002419005	999	No
asm_GCA_002381865_1.LargeContigs	96.64	0.34	2239074	76	48345	38.5	No	0	0	1	High-Quality	MAG	Bacteria	Bacillota_A	Clostridia	Lachnospirales	Vallitaleaceae	UBA4080	UBA4080 sp002381865	1860	Yes
asm_GCA_002381885_1.LargeContigs	62.93	0	3393988	344	12799	33.2	No	0	0	2	Medium-Quality	MAG	Bacteria	Pseudomonadota	Gammaproteobacteria	Enterobacterales_A	Alteromonadaceae	Pararheinheimera	Pararheinheimera sp003543135	2066	Yes
asm_GCA_002381895_1.LargeContigs	94.37	6.45	3488303	138	38445	39.5	No	0	0	0	Medium-Quality	MAG	Bacteria	Desulfobacterota_F	Desulfuromonadia	Geobacterales	Geobacteraceae	RPRC01	RPRC01 sp002419385	1521	No
asm_GCA_002381925_1.LargeContigs	81.4	0	615197	5	145413	41.6	Yes	2	0	1	Medium-Quality	MAG	Bacteria	Patescibacteria	Dojkabacteria	SC72	SC72	UBA2259	UBA2259 sp002347605	2199	Yes
asm_GCA_002381945_1.LargeContigs	86.98	5.95	3690365	67	97544	38.8	No	0	0	1	Medium-Quality	MAG	Bacteria	Bdellovibrionota	Bacteriovoracia	Bacteriovoracales	Bacteriovoracaceae	UBA4096	UBA4096 sp002381945	2115	Yes
asm_GCA_002381965_1.LargeContigs	91.45	2.82	2723914	117	34902	37.9	Yes	1	0	1	High-Quality	MAG	Bacteria	Desulfobacterota	Syntrophia	Syntrophales	UBA2251	UBA2251	UBA2251 sp002347815	928	Yes
asm_GCA_002381985_1.LargeContigs	70.76	1.09	2274170	206	15929	38.7	No	0	0	1	Medium-Quality	MAG	Bacteria	Chloroflexota	Anaerolineae	Anaerolineales	Anaerolineaceae	UBA6170	UBA6170 sp002840735	2470	Yes
asm_GCA_002382005_1.LargeContigs	91.05	4.52	2780819	254	15366	39.3	No	0	0	1	High-Quality	MAG	Bacteria	Desulfobacterota	Desulfobacteria	Desulfobacterales	UBA2245	UBA2245	UBA2245 sp002347265	1323	Yes
asm_GCA_002382025_1.LargeContigs	90.7	0	592661	73	10701	43.9	Yes	1	0	1	High-Quality	MAG	Bacteria	Patescibacteria	Paceibacteria	Paceibacterales	UBA5633	UBA5633	UBA5633 sp002382025	211	Yes
asm_GCA_002382045_1.LargeContigs	92.58	2.58	2952923	229	18867	37.7	Yes	1	0	0	High-Quality	MAG	Bacteria	Desulfobacterota	Syntrophia	Syntrophales	Smithellaceae	UBA8904	UBA8904 sp002382045	1833	Yes
asm_GCA_002382065_1.LargeContigs	97.42	0.32	4771987	300	24730	39.6	No	0	0	0	High-Quality	MAG	Bacteria	Desulfobacterota	Desulfobacteria	Desulfobacterales	Desulfatirhabdiaceae	UBA4064	UBA4064 sp002382065	232	Yes
asm_GCA_002382075_1.LargeContigs	86.05	0	598270	69	11336	38.2	Yes	1	0	1	Medium-Quality	MAG	Bacteria	Patescibacteria	Microgenomatia	UBA12405	UBA12405	UBA5615	UBA5615 sp002382075	52	Yes
asm_GCA_002382085_1.LargeContigs	95.14	0.65	2604078	15	296754	35.3	No	0	0	0	High-Quality	MAG	Bacteria	Campylobacterota	Campylobacteria	Campylobacterales	Sulfurospirillaceae	Sulfurospirillum	Sulfurospirillum sp002382085	2219	Yes
asm_GCA_002382125_1.LargeContigs	58.32	0.32	1231282	106	17979	41.2	Yes	1	0	1	Medium-Quality	MAG	Bacteria	Bacillota_B	Desulfotomaculia	Desulfotomaculales	Nap2-2B	UBA4053	UBA4053 sp003457075	1136	Yes
asm_GCA_002382135_1.LargeContigs	95.16	1.29	2751569	118	36734	39	Yes	1	1	1	High-Quality	MAG	Bacteria	Desulfobacterota	Syntrophia	Syntrophales	Smithellaceae	Smithella	Smithella sp000747625	1829	Yes
asm_GCA_002382165_1.LargeContigs	85.29	1.59	2885096	218	21308	34.5	No	0	0	0	Medium-Quality	MAG	Bacteria	Pseudomonadota	Gammaproteobacteria	Burkholderiales	Rhodocyclaceae	Thauera	Thauera chlorobenzoica	1556	Yes
asm_GCA_002382185_1.LargeContigs	94.52	0.65	2267977	105	32046	37.5	No	0	0	0	High-Quality	MAG	Bacteria	Desulfobacterota_F	Desulfuromonadia	Geobacterales	Pseudopelobacteraceae	Trichlorobacter	Trichlorobacter sp002419465	1311	No
asm_GCA_002382205_1.LargeContigs	83.43	3.49	3313445	110	51546	41	No	0	0	1	Medium-Quality	MAG	Bacteria	Bacillota_A	Clostridia	Clostridiales	Clostridiaceae	Youngiibacter	Youngiibacter fragilis	2073	Yes
asm_GCA_002382245_1.LargeContigs	99.18	0	2841742	45	90869	35.4	No	0	0	2	High-Quality	MAG	Bacteria	Pseudomonadota	Gammaproteobacteria	Pseudomonadales	Moraxellaceae	Acinetobacter	Acinetobacter radioresistens	464	No
asm_GCA_002382285_1.LargeContigs	55.19	0.49	1866706	136	21818	35	No	0	0	1	Medium-Quality	MAG	Bacteria	Pseudomonadota	Gammaproteobacteria	Burkholderiales	Rhodocyclaceae	Thauera	Thauera sp000310145	1557	Yes
asm_GCA_002382495_1.LargeContigs	86.5	1.25	2023127	43	93082	35.8	No	0	0	0	Medium-Quality	MAG	Bacteria	Bacteroidota	Bacteroidia	Flavobacteriales	Flavobacteriaceae	Flavobacterium	Flavobacterium sp002382495	2300	Yes
asm_GCA_002382525_1.LargeContigs	85.3	0.73	3947076	346	15769	33.3	No	0	0	1	Medium-Quality	MAG	Bacteria	Verrucomicrobiota	Verrucomicrobiae	Opitutales	Opitutaceae	Rariglobus	Rariglobus sp002382525	821	Yes
asm_GCA_002382535_1.LargeContigs	88.89	2.56	3824564	63	108178	35.2	No	0	2	2	Medium-Quality	MAG	Bacteria	Cyanobacteriota	Sericytochromatia	S15B-MN24	UBA4093	UBA4093	UBA4093 sp002083825	1155	Yes
asm_GCA_002382565_1.LargeContigs	78.98	1.96	1868711	150	17791	41	No	0	0	1	Medium-Quality	MAG	Bacteria	Desulfobacterota	Syntrophia	Syntrophales	UBA4778	UBA2207	UBA2207 sp002418885	1812	No
asm_GCA_002382585_1.LargeContigs	86.52	2.25	3362641	308	15412	40.7	No	0	0	3	Medium-Quality	MAG	Bacteria	UBP4	UBA4092	UBA4092	UBA4092	UBA4092	UBA4092 sp002428325	363	No
asm_GCA_002382605_1.LargeContigs	84.28	0	1846378	185	14542	43	No	0	0	1	Medium-Quality	MAG	Bacteria	Synergistota	Synergistia	Synergistales	Thermovirgaceae	UBA2252	UBA2252 sp002382605	649	No
asm_GCA_002382615_1.LargeContigs	94.52	0.99	962248	29	45117	40.4	No	0	0	0	High-Quality	MAG	Bacteria	Chloroflexota	Dehalococcoidia	Dehalococcoidales	UBA4087	UBA4087	UBA4087 sp002382615	59	Yes
asm_GCA_002382645_1.LargeContigs	90.88	0.59	2862623	208	20808	38.1	No	0	0	1	High-Quality	MAG	Bacteria	Desulfobacterota	Desulfovibrionia	Desulfovibrionales	Desulfovibrionaceae	Aminidesulfovibrio	Aminidesulfovibrio sp002382645	1549	Yes
asm_GCA_002382665_1.LargeContigs	91.23	0.27	2043844	19	226347	38.1	No	0	0	1	High-Quality	MAG	Bacteria	Bacillota_B	Dehalobacteriia	UBA4068	UBA4068	UBA4068	UBA4068 sp002382665	448	Yes
asm_GCA_002382685_1.LargeContigs	84.18	1.74	1798995	205	12496	39.4	No	0	0	1	Medium-Quality	MAG	Bacteria	Bacillota_B	Desulfotomaculia	Desulfotomaculales	Nap2-2B	SCADC1-2-3	SCADC1-2-3 sp000681355	536	No
asm_GCA_002382705_1.LargeContigs	98.28	0	2343366	61	60109	39.7	Yes	1	1	0	High-Quality	MAG	Bacteria	Desulfobacterota_F	Desulfuromonadia	Geobacterales	Pseudopelobacteraceae	UBA4057	UBA4057 sp002382705	1612	Yes
asm_GCA_002382725_1.LargeContigs	71.93	1.75	3283190	91	66048	38.8	No	0	0	1	Medium-Quality	MAG	Bacteria	Desulfobacterota	Desulfobulbia	Desulfobulbales	Desulfocapsaceae	Desulfoprunum	Desulfoprunum sp000769715	1543	No
asm_GCA_002382735_1.LargeContigs	96.7	1.1	2507553	73	56107	40.8	Yes	1	1	0	High-Quality	MAG	Bacteria	Delongbacteria	UBA4055	UBA4055	UBA4055	UBA4055	UBA4055 sp002382735	199	Yes
asm_GCA_002382755_1.LargeContigs	85.03	0	1815055	101	27603	41.6	Yes	1	1	1	Medium-Quality	MAG	Bacteria	Bacillota_B	Desulfotomaculia	Desulfotomaculales	Nap2-2B	46-80	46-80 sp002382755	1135	Yes
asm_GCA_002382785_1.LargeContigs	90.14	1.32	2486276	56	80350	39.4	No	0	0	1	High-Quality	MAG	Bacteria	Bacillota_B	Desulfitobacteriia	Desulfitobacteriales	Desulfitobacteriaceae	Desulfosporosinus	Desulfosporosinus sp000770645	1006	Yes
asm_GCA_002383285_1.LargeContigs	74.56	0.18	3243128	115	39170	38	No	0	0	10	Medium-Quality	MAG	Bacteria	Bacillota	Bacilli	Paenibacillales	UBA4045	UBA4045	UBA4045 sp002383285	1001	Yes
asm_GCA_002383305_1.LargeContigs	96.8	1.12	1210179	59	32218	35.8	No	0	0	1	High-Quality	MAG	Bacteria	Bacillota	Bacilli	RFN20	CAG-826	UBA6120	UBA6120 sp002422535	368	No
asm_GCA_002383325_1.LargeContigs	85.35	3.85	3491420	155	33460	37.6	No	0	0	3	Medium-Quality	MAG	Bacteria	Acidobacteriota	Aminicenantia	Aminicenantales	UBA4085	UBA4085	UBA4085 sp002383325	930	Yes
asm_GCA_002383345_1.LargeContigs	90.76	0	1323269	157	10879	39	No	0	0	0	High-Quality	MAG	Bacteria	Chloroflexota	Dehalococcoidia	UBA2247	UBA2247	UBA2247	UBA2247 sp002347295	2171	Yes
asm_GCA_002383355_1.LargeContigs	98.31	4.24	1682140	78	35787	42.3	No	0	0	0	High-Quality	MAG	Bacteria	Atribacterota	JS1	SB-45	34-128	UBA4082	UBA4082 sp002383355	2194	Yes
asm_GCA_002383375_1.LargeContigs	93.52	2.3	2247739	84	37427	38.4	Yes	1	0	0	High-Quality	MAG	Bacteria	Spirochaetota	Spirochaetia	Treponematales	Rectinemataceae	UBA2256	UBA2256 sp002383375	140	Yes
asm_GCA_002383405_1.LargeContigs	75.09	1.57	2012268	177	16609	37.1	No	0	0	0	Medium-Quality	MAG	Bacteria	Bacillota_B	Moorellia	Moorellales	Moorellaceae	Moorella	Moorella sp002383405	1230	Yes
asm_GCA_002383415_1.LargeContigs	93.87	4.65	2505889	162	22657	36.9	No	0	0	0	High-Quality	MAG	Bacteria	Desulfobacterota_F	Desulfuromonadia	Geobacterales	Pseudopelobacteraceae	Trichlorobacter	Trichlorobacter sp002383415	1312	Yes
asm_GCA_002383425_1.LargeContigs	84.52	0.95	2642304	195	17364	37.7	No	0	0	1	Medium-Quality	MAG	Bacteria	Bacteroidota	Bacteroidia	Bacteroidales	Tenuifilaceae	Tenuifilum	Tenuifilum sp002383425	88	Yes
asm_GCA_002383435_1.LargeContigs	95.16	3.49	3319370	286	18401	37.5	No	0	0	0	High-Quality	MAG	Bacteria	Bacteroidota	Bacteroidia	Bacteroidales	Paludibacteraceae	Paludibacter	Paludibacter sp002427615	749	No
asm_GCA_002383485_1.LargeContigs	99.05	2.62	3430571	56	118145	38.4	Yes	1	0	0	High-Quality	MAG	Bacteria	Bacteroidota	Bacteroidia	Bacteroidales	VadinHA17	SR-FBR-E99	SR-FBR-E99 sp002383485	96	Yes
asm_GCA_002383495_1.LargeContigs	93.55	1.29	2656228	67	63893	40.9	Yes	1	1	5	High-Quality	MAG	Bacteria	Desulfobacterota	Syntrophia	Syntrophales	UBA4778	UBA4054	UBA4054 sp002383495	1813	No
asm_GCA_002383505_1.LargeContigs	98.55	0.97	2592771	33	111920	35.8	No	0	0	1	High-Quality	MAG	Bacteria	Campylobacterota	Campylobacteria	Campylobacterales	Sulfurospirillaceae	Sulfurospirillum	Sulfurospirillum sp000743525	2218	No
asm_GCA_002383565_1.LargeContigs	91.6	1.05	1775607	201	11690	42.1	No	0	0	2	High-Quality	MAG	Bacteria	Bacillota_A	Clostridia	Tissierellales	Tissierellaceae_C	Gudongella	Gudongella oleilytica	1218	No
asm_GCA_002383605_1.LargeContigs	96.72	1.09	2855839	138	30913	38.7	No	0	0	1	High-Quality	MAG	Bacteria	Bacteroidota	Bacteroidia	Bacteroidales	Dysgonomonadaceae	Proteiniphilum	Proteiniphilum sp002383605	687	Yes
asm_GCA_002383615_1.LargeContigs	67.27	1.82	1678382	183	11773	35.8	No	0	0	1	Medium-Quality	MAG	Bacteria	Chloroflexota	Anaerolineae	Anaerolineales	Anaerolineaceae	UBA4081	UBA4081 sp002383615	817	Yes
asm_GCA_002383625_1.LargeContigs	69	3.23	2344476	165	20324	40.1	No	0	0	0	Medium-Quality	MAG	Bacteria	Desulfobacterota_G	Syntrophorhabdia	Syntrophorhabdales	Syntrophorhabdaceae	Delta-02	Delta-02 sp002418985	1821	No
asm_GCA_002383665_1.LargeContigs	87.21	0	1452311	110	18979	39.6	No	0	1	1	Medium-Quality	MAG	Bacteria	Chloroflexota	Dehalococcoidia	GIF9	UBA5629	UBA6808	UBA6808 sp002383665	1999	Yes
asm_GCA_002383685_1.LargeContigs	98.31	0	1977963	63	56127	43.9	No	0	1	1	High-Quality	MAG	Bacteria	Synergistota	Synergistia	Synergistales	Thermovirgaceae	UBA4066	UBA4066 sp002383685	650	Yes
asm_GCA_002383695_1.LargeContigs	97.98	0	5252276	114	76294	37.6	No	0	0	3	High-Quality	MAG	Bacteria	Bacillota	Bacilli	Paenibacillales	UBA4045	UBA4045	UBA4045 sp002383695	1002	Yes
asm_GCA_002383805_1.LargeContigs	87.88	2.74	3954176	381	14133	33.2	No	0	0	1	Medium-Quality	MAG	Bacteria	Verrucomicrobiota	Verrucomicrobiae	Opitutales	Opitutaceae	Rariglobus	Rariglobus sp002382525	821	No
asm_GCA_002386545_1.LargeContigs	99.45	0	2977348	41	162001	35.4	No	0	0	1	High-Quality	MAG	Bacteria	Pseudomonadota	Gammaproteobacteria	Pseudomonadales	Moraxellaceae	Acinetobacter	Acinetobacter radioresistens	464	No
asm_GCA_002387345_1.LargeContigs	89.35	0	2492064	254	12438	35.3	No	0	0	0	Medium-Quality	MAG	Bacteria	Pseudomonadota	Gammaproteobacteria	Pseudomonadales	Moraxellaceae	Acinetobacter	Acinetobacter radioresistens	464	No
asm_GCA_002400405_1.LargeContigs	95.35	2.33	979487	77	19004	40.1	No	0	0	1	High-Quality	MAG	Bacteria	Patescibacteria	Paceibacteria	Moranbacterales	UBA2206	UBA2206	UBA2206 sp002400405	2157	Yes
asm_GCA_002402275_1.LargeContigs	71.06	3.82	2483461	265	13247	38.2	No	0	0	0	Medium-Quality	MAG	Bacteria	Chloroflexota	Anaerolineae	Anaerolineales	UBA4823	UBA4823	UBA4823 sp002402275	2495	Yes
asm_GCA_002402295_1.LargeContigs	78.57	0	1003466	65	33918	37.1	No	0	0	1	Medium-Quality	MAG	Bacteria	Caldisericota	Caldisericia	Cryosericales	Cryosericaceae	Cryosericum	Cryosericum sp002402295	2104	Yes
asm_GCA_002402305_1.LargeContigs	76.15	0.56	2788961	270	14778	40.7	No	0	0	2	Medium-Quality	MAG	Bacteria	Bacillota_A	Clostridia	Clostridiales	Clostridiaceae	Youngiibacter	Youngiibacter sp002428605	2074	Yes
asm_GCA_002402315_1.LargeContigs	90.89	4.08	2982092	271	17721	40.6	No	0	0	2	High-Quality	MAG	Bacteria	Bacillota_A	Clostridia	UBA4821	UBA4821	UBA4821	UBA4821 sp002402315	2490	Yes
asm_GCA_002402325_1.LargeContigs	91.83	3.42	2124892	175	15647	43.6	No	0	0	0	High-Quality	MAG	Bacteria	Acidobacteriota	UBA4820	UBA4820	UBA4820	UBA4820	UBA4820 sp002402325	266	Yes
asm_GCA_002402375_1.LargeContigs	89.82	1.12	1544881	59	34970	39.6	No	0	0	0	Medium-Quality	MAG	Bacteria	Elusimicrobiota	UBA8919	UBA8919	UBA8919	UBA8919	UBA8919 sp002402375	2252	Yes
asm_GCA_002402385_1.LargeContigs	83.87	1.29	3918018	212	28666	43.6	No	0	0	0	Medium-Quality	MAG	Bacteria	Desulfobacterota_F	BSN033	BSN033	UBA1163	UBA1163	UBA1163 sp002327985	908	No
asm_GCA_002402395_1.LargeContigs	76.24	0.82	2224070	151	20319	39.5	No	0	0	0	Medium-Quality	MAG	Bacteria	Bacteroidota	Bacteroidia	Bacteroidales	Prolixibacteraceae	UBA1413	UBA1413 sp002419285	150	No
asm_GCA_002402405_1.LargeContigs	96.09	3.27	4122483	114	61535	33.5	No	0	0	1	High-Quality	MAG	Bacteria	Pseudomonadota	Alphaproteobacteria	Sphingomonadales	Sphingomonadaceae	Sphingomonas	Sphingomonas paucimobilis	1764	No
asm_GCA_002402455_1.LargeContigs	97.67	2.33	654552	31	37428	40.6	No	0	0	0	High-Quality	MAG	Bacteria	Patescibacteria	Dojkabacteria	SC72	SC72	UBA2177	UBA2177 sp002402455	2198	Yes
asm_GCA_002402465_1.LargeContigs	90.32	1.08	2849641	55	67672	38.7	No	0	0	0	High-Quality	MAG	Bacteria	Bacteroidota	Bacteroidia	Bacteroidales	UBA7960	UBA7960	UBA7960 sp002402465	761	Yes
asm_GCA_002402475_1.LargeContigs	89.09	6.36	4688798	91	90027	36.9	No	0	0	0	Medium-Quality	MAG	Bacteria	Chloroflexota	Anaerolineae	Promineofilales	UBA4811	UBA4811	UBA4811 sp002328075	1186	No
asm_GCA_002402485_1.LargeContigs	84.4	0	3513415	155	34032	37.9	No	0	0	0	Medium-Quality	MAG	Bacteria	Acidobacteriota	Thermoanaerobaculia	UBA2201	UBA2201	UBA2201	UBA2201 sp002327305	880	No
asm_GCA_002402535_1.LargeContigs	86.05	0	555024	67	12312	39.3	No	0	1	0	Medium-Quality	MAG	Bacteria	Patescibacteria	Microgenomatia	UBA12405	UBA12405	UBA12158	UBA12158 sp002402535	53	Yes
asm_GCA_002402545_1.LargeContigs	81.84	0	2311654	109	34664	38.5	No	0	0	0	Medium-Quality	MAG	Bacteria	Desulfobacterota	Syntrophia	Syntrophales	Smithellaceae	UBA4810	UBA4810 sp002402545	1826	Yes
asm_GCA_002402575_1.LargeContigs	83.5	4.24	2142375	170	22730	39.4	No	0	0	0	Medium-Quality	MAG	Bacteria	Bacillota_B	Syntrophomonadia	Syntrophomonadales	Syntrophomonadaceae	DTU019	DTU019 sp002402575	2000	Yes
asm_GCA_002402585_1.LargeContigs	96.25	0.47	1857832	109	27219	36.5	Yes	2	0	1	High-Quality	MAG	Bacteria	Bacillota	Bacilli	Erysipelotrichales	Erysipelotrichaceae	UBA2212	UBA2212 sp002402585	2366	Yes
asm_GCA_002402615_1.LargeContigs	91.29	1.29	3124547	64	70868	38.9	No	0	0	1	High-Quality	MAG	Bacteria	Desulfobacterota	Desulfobaccia	Desulfobaccales	Desulfobaccaceae	Desulfobacca	Desulfobacca acetoxidans	842	Yes
asm_GCA_002402635_1.LargeContigs	61.33	0	2112283	187	20082	41.2	No	0	0	0	Medium-Quality	MAG	Bacteria	Deferribacterota	Deferribacteres	Deferribacterales	UBA228	UBA228	UBA228 sp002402635	2445	No
asm_GCA_002402645_1.LargeContigs	98.2	5.25	3833239	202	34684	40.4	Yes	1	0	0	Medium-Quality	MAG	Bacteria	Bacteroidota	Bacteroidia	Bacteroidales	VadinHA17	LD21	LD21 sp002428385	103	No
asm_GCA_002402655_1.LargeContigs	93.1	7.55	2206146	152	19841	42.1	No	0	0	1	Medium-Quality	MAG	Bacteria	Desulfobacterota	Syntrophia	Syntrophales	UBA2210	UBA2210	UBA2210 sp002327865	1804	No
asm_GCA_002402695_1.LargeContigs	93.19	2.81	3043072	98	58323	37.4	Yes	1	0	2	High-Quality	MAG	Bacteria	Spirochaetota	UBA4802	UBA4802	UB4802	UBA4802	UBA4802 sp002328585	2178	No
asm_GCA_002402715_1.LargeContigs	83.05	0	1727801	125	23675	38.3	Yes	2	0	0	Medium-Quality	MAG	Bacteria	Bipolaricaulota	Bipolaricaulia	Bipolaricaulales	Bipolaricaulaceae	Bipolaricaulis	Bipolaricaulis sp020062805	900	No
asm_GCA_002402725_1.LargeContigs	54.9	0.18	1344617	48	51427	36.4	No	0	0	0	Medium-Quality	MAG	Bacteria	Chloroflexota	Anaerolineae	Anaerolineales	Anaerolineaceae	UBA6107	UBA6107 sp002402725	612	Yes
asm_GCA_002402755_1.LargeContigs	86.02	2.69	5028331	413	17438	36	No	0	0	1	Medium-Quality	MAG	Bacteria	Planctomycetota	UBA8108	UBA8890	UBA8898	UBA8898	UBA8898 sp002402755	1470	Yes
asm_GCA_002402775_1.LargeContigs	70.56	0.7	1511842	84	28674	42.3	No	0	0	1	Medium-Quality	MAG	Bacteria	Bacillota_A	Clostridia	Tissierellales	Tissierellaceae_C	Gudongella	Gudongella oleilytica	1218	No
asm_GCA_002402795_1.LargeContigs	89.86	1.33	2178436	183	17742	42.2	Yes	1	0	1	Medium-Quality	MAG	Bacteria	Desulfobacterota_G	Syntrophorhabdia	Syntrophorhabdales	Syntrophorhabdaceae	UBA8905	UBA8905 sp002402795	260	Yes
asm_GCA_002402815_1.LargeContigs	87.2	6.13	3557741	246	22296	39.6	No	0	0	0	Medium-Quality	MAG	Bacteria	Desulfobacterota	Syntrophia	Syntrophales	UBA4778	UBA2192	UBA2192 sp002327315	1814	No
asm_GCA_002402825_1.LargeContigs	85.46	0.32	1821946	44	87076	38.8	No	0	0	3	Medium-Quality	MAG	Bacteria	Bacillota_B	Desulfotomaculia	Desulfotomaculales	Nap2-2B	SCADC1-2-3	SCADC1-2-3 sp002402825	536	Yes
asm_GCA_002402855_1.LargeContigs	71.19	0	1752214	49	74480	43.8	No	0	0	0	Medium-Quality	MAG	Bacteria	Synergistota	Synergistia	Synergistales	Thermovirgaceae	UBA4066	UBA4066 sp002383685	650	No
asm_GCA_002402875_1.LargeContigs	82.84	1.94	1826501	155	15484	41	No	0	0	0	Medium-Quality	MAG	Bacteria	Desulfobacterota	Syntrophia	Syntrophales	UBA4778	UBA2207	UBA2207 sp002418885	1812	No
asm_GCA_002402885_1.LargeContigs	97.67	2.33	615851	10	180769	42.6	No	0	0	4	High-Quality	MAG	Bacteria	Patescibacteria	Paceibacteria	Paceibacterales	UBA5633	UBA2211	UBA2211 sp002327845	2203	Yes
asm_GCA_002402905_1.LargeContigs	74.09	2.9	4004481	165	46955	37.6	No	0	0	0	Medium-Quality	MAG	Bacteria	Desulfobacterota	Desulfobacteria	Desulfobacterales	Desulfosarcinaceae	Desulfatitalea	Desulfatitalea sp002402905	1545	Yes
asm_GCA_002402935_1.LargeContigs	98.77	0.61	1781574	13	140928	36.5	No	0	0	0	High-Quality	MAG	Bacteria	Campylobacterota	Campylobacteria	Campylobacterales	Sulfurovaceae	Sulfurovum	Sulfurovum sp002742845	2239	Yes
asm_GCA_002402945_1.LargeContigs	91.48	2.31	1934053	122	23551	39.9	No	0	0	3	High-Quality	MAG	Bacteria	Bacillota_B	Desulfotomaculia	Desulfotomaculales	Pelotomaculaceae	Syntrophopropionicum	Syntrophopropionicum sp002402945	1183	Yes
asm_GCA_002402965_1.LargeContigs	93.1	3.62	3097023	95	52132	38.7	Yes	1	0	10	High-Quality	MAG	Bacteria	Bacteroidota	Bacteroidia	Bacteroidales	VadinHA17	SR-FBR-E99	SR-FBR-E99 sp002402965	97	Yes
asm_GCA_002402995_1.LargeContigs	100	0	765527	4	215760	40.1	Yes	1	1	5	High-Quality	MAG	Bacteria	Patescibacteria	ABY1	UBA2591	UBA4787	UBA4787	UBA4787 sp002402995	668	Yes
asm_GCA_002403015_1.LargeContigs	85.71	2.2	2375953	26	182141	37.1	No	0	0	1	Medium-Quality	MAG	Bacteria	Marinisomatota	UBA2242	UBA2242	UBA2242	UBA2242	UBA2242 sp002347855	1987	No
asm_GCA_002403025_1.LargeContigs	68.91	1.15	1146709	140	10572	36.1	Yes	1	0	2	Medium-Quality	MAG	Bacteria	Spirochaetota	Spirochaetia	Treponematales	Rectinemataceae	Rectinema	Rectinema subterraneum	132	No
asm_GCA_002403055_1.LargeContigs	61.29	0.91	2066437	214	13158	37.2	Yes	1	0	0	Medium-Quality	MAG	Bacteria	Chloroflexota	Anaerolineae	Anaerolineales	Anaerolineaceae	Brevefilum	Brevefilum sp002436005	816	No
asm_GCA_002403075_1.LargeContigs	89.91	1.2	2479552	102	41710	38.1	No	0	0	2	Medium-Quality	MAG	Bacteria	Krumholzibacteriota	Krumholzibacteria	Krumholzibacteriales	Krumholzibacteriaceae	SSS58A	SSS58A sp002403075	1428	Yes
asm_GCA_002403095_1.LargeContigs	80.45	4.73	2255585	55	67030	36.8	Yes	1	0	3	Medium-Quality	MAG	Bacteria	Chloroflexota	Anaerolineae	Anaerolineales	Anaerolineaceae	UBA4782	UBA4782 sp002403095	611	Yes
asm_GCA_002403105_1.LargeContigs	70.22	1.82	1916756	111	28871	37.2	No	0	0	1	Medium-Quality	MAG	Bacteria	Chloroflexota	Anaerolineae	Anaerolineales	Anaerolineaceae	UBA4781	UBA4781 sp002403105	608	Yes
asm_GCA_002403115_1.LargeContigs	82.74	1.1	2273823	239	12087	40.3	No	0	0	2	Medium-Quality	MAG	Bacteria	Edwardsbacteria	AC1	AC1	UBA8901	UBA8901	UBA8901 sp002403115	878	Yes
asm_GCA_002403155_1.LargeContigs	98.77	1.02	1862692	14	254469	36.3	No	0	0	1	High-Quality	MAG	Bacteria	Campylobacterota	Campylobacteria	Campylobacterales	Sulfurovaceae	Sulfurovum	Sulfurovum sp002403155	2240	Yes
asm_GCA_002403175_1.LargeContigs	84.7	5.65	3438370	342	14613	40.6	No	0	0	0	Medium-Quality	MAG	Bacteria	Desulfobacterota	Syntrophia	Syntrophales	UBA4778	UBA4778	UBA4778 sp002403175	1824	Yes
asm_GCA_002403185_1.LargeContigs	82.2	0	1150656	70	24321	38.5	Yes	2	1	1	Medium-Quality	MAG	Bacteria	Bipolaricaulota	Bipolaricaulia	Bipolaricaulales	Bipolaricaulaceae	Bipolaricaulis	Bipolaricaulis anaerobius	901	Yes
asm_GCA_002403205_1.LargeContigs	67.58	1.82	1908376	36	71109	36.6	Yes	1	0	1	Medium-Quality	MAG	Bacteria	Chloroflexota	Anaerolineae	Anaerolineales	Anaerolineaceae	Brevefilum	Brevefilum sp002403205	818	Yes
asm_GCA_002403255_1.LargeContigs	91.66	1.1	2065301	137	27505	39.8	No	0	2	1	High-Quality	MAG	Bacteria	WOR-3	32-111	32-111	32-111	UBA2202	UBA2202 sp002327905	82	No
asm_GCA_002403265_1.LargeContigs	90.03	2.02	2183232	44	83999	39	No	0	0	0	High-Quality	MAG	Bacteria	Bacillota_B	Desulfotomaculia	Desulfotomaculales	Nap2-2B	SCADC1-2-3	SCADC1-2-3 sp002327235	535	No
asm_GCA_002403295_1.LargeContigs	75.01	3.4	2177835	227	11511	37.7	No	0	0	3	Medium-Quality	MAG	Bacteria	Krumholzibacteriota	Krumholzibacteria	Krumholzibacteriales	Krumholzibacteriaceae	SSS58A	SSS58A sp002403295	1427	No
asm_GCA_002403305_1.LargeContigs	97.14	2.38	3427989	24	237246	38.3	Yes	1	0	1	High-Quality	MAG	Bacteria	Bacteroidota	Bacteroidia	Bacteroidales	VadinHA17	SR-FBR-E99	SR-FBR-E99 sp002403305	95	Yes
asm_GCA_002403335_1.LargeContigs	96.43	0	1380542	23	89985	41.5	Yes	1	1	0	High-Quality	MAG	Bacteria	Caldisericota	Caldisericia	Caldisericales	Caldisericaceae	UBA4770	UBA4770 sp002403335	2176	Yes
asm_GCA_002403345_1.LargeContigs	95.48	1.94	3803100	93	56827	37.3	No	0	0	0	High-Quality	MAG	Bacteria	Desulfobacterota	Desulfobacteria	Desulfobacterales	UBA2174	UBA2174	UBA2174 sp002327445	1513	No
asm_GCA_002403375_1.LargeContigs	96.66	1.42	2968347	27	192907	33.8	No	0	0	0	High-Quality	MAG	Bacteria	Pseudomonadota	Gammaproteobacteria	Burkholderiales	Thiobacillaceae	Thiobacillus	Thiobacillus denitrificans_E	1505	Yes
asm_GCA_002403385_1.LargeContigs	92.58	1.29	1832146	82	41564	40.6	Yes	1	1	1	High-Quality	MAG	Bacteria	Desulfobacterota	Syntrophia	Syntrophales	UBA4767	UBA4767	UBA4767 sp002403385	1837	Yes
asm_GCA_002412205_1.LargeContigs	63.32	5.61	1338836	107	17463	42.5	No	0	0	0	Medium-Quality	MAG	Archaea	Thermoproteota	Nitrososphaeria	Geothermarchaeales	JDFR-13	Family_JDFR-13	Family_JDFR-13	1884	Yes
asm_GCA_002416185_1.LargeContigs	88.77	0	2704466	25	171063	35.3	No	0	0	0	Medium-Quality	MAG	Bacteria	Pseudomonadota	Gammaproteobacteria	Pseudomonadales	Moraxellaceae	Acinetobacter	Acinetobacter radioresistens	464	No
asm_GCA_002418585_1.LargeContigs	84.28	2.73	2546399	234	15830	40	No	0	0	0	Medium-Quality	MAG	Bacteria	Bacillota_B	Desulfitobacteriia	Desulfitobacteriales	Desulfitobacteriaceae	Desulfosporosinus	Desulfosporosinus sp000770645	1006	No
asm_GCA_002418595_1.LargeContigs	84.46	1.08	1397877	131	14279	42.3	No	0	0	0	Medium-Quality	MAG	Bacteria	Omnitrophota	Koll11	GIF10	Profunditerraquicolaceae	Undivivens	Undivivens industriae	1146	Yes
asm_GCA_002418625_1.LargeContigs	96.45	1.65	2535298	75	51680	40	No	0	0	0	High-Quality	MAG	Bacteria	Bacillota_A	Clostridia	Peptostreptococcales	Anaerovoracaceae	UBA5774	UBA5774 sp002418625	832	Yes
asm_GCA_002418645_1.LargeContigs	93.26	3.1	3319672	281	16106	40.7	No	0	0	1	High-Quality	MAG	Bacteria	Bacteroidota	Bacteroidia	Bacteroidales	VadinHA17	LD21	LD21 sp002428385	103	Yes
asm_GCA_002418655_1.LargeContigs	94.54	4.49	1504156	129	17478	42.4	No	0	0	0	High-Quality	MAG	Bacteria	Atribacterota	JS1	SB-45	34-128	UBA4082	UBA4082 sp002383355	2194	No
asm_GCA_002418685_1.LargeContigs	84.71	2.51	2038026	157	17967	37.7	No	0	0	1	Medium-Quality	MAG	Bacteria	Bacteroidota	Kapabacteria	Kapabacteriales	UBA2268	UBA2268	UBA2268 sp002418685	2473	Yes
asm_GCA_002418705_1.LargeContigs	81.56	2.54	3216168	141	41247	38.3	No	0	0	0	Medium-Quality	MAG	Bacteria	Bacillota_A	Clostridia	Saccharofermentanales	Saccharofermentanaceae	Firm-13	Firm-13 sp002418705	391	Yes
asm_GCA_002418725_1.LargeContigs	97.33	0.89	1760184	48	68745	36.3	No	0	0	0	High-Quality	MAG	Bacteria	Bacillota	Bacilli	Acholeplasmatales	Acholeplasmataceae	UBA2284	UBA2284 sp002418725	2501	Yes
asm_GCA_002418745_1.LargeContigs	84.36	0.68	1815876	155	15793	43.2	No	0	0	3	Medium-Quality	MAG	Bacteria	Synergistota	Synergistia	Synergistales	Thermovirgaceae	UBA2252	UBA2252 sp002382605	649	No
asm_GCA_002418765_1.LargeContigs	76.78	2.11	2146242	47	69908	40.3	No	0	0	0	Medium-Quality	MAG	Bacteria	Bacillota_B	TC1	TC1	UBA5767	UBA5767	UBA5767 sp002418765	1412	Yes
asm_GCA_002418775_1.LargeContigs	89.21	0.63	2099990	80	41632	41	No	0	0	0	Medium-Quality	MAG	Bacteria	Bacillota_B	Desulfotomaculia	Desulfotomaculales	Nap2-2B	46-80	46-80 sp002418775	1133	Yes
asm_GCA_002418805_1.LargeContigs	85.37	1.72	2284655	183	19021	39.3	No	0	0	0	Medium-Quality	MAG	Bacteria	Spirochaetota	Spirochaetia	Treponematales	Rectinemataceae	UBA2256	UBA2256 sp001603165	141	Yes
asm_GCA_002418825_1.LargeContigs	77.42	3.23	2115907	98	37661	38.8	No	0	0	0	Medium-Quality	MAG	Bacteria	Desulfobacterota	Syntrophia	Syntrophales	Smithellaceae	UBA4810	UBA4810 sp002418825	1827	Yes
asm_GCA_002418835_1.LargeContigs	83.15	1.12	4444444	34	246426	40.5	No	0	0	0	Medium-Quality	MAG	Bacteria	Spirochaetota	UBA4802	UBA4802	UBA5550	UBA5550	UBA5550 sp002418835	743	Yes
asm_GCA_002418865_1.LargeContigs	91.28	1.61	2796932	102	62615	39	Yes	1	0	1	High-Quality	MAG	Bacteria	Bacteroidota	Bacteroidia	Bacteroidales	TTA-H9	TTA-H9	TTA-H9 sp002418865	2316	Yes
asm_GCA_002418885_1.LargeContigs	80.42	1.29	2026494	89	36652	41	No	0	0	1	Medium-Quality	MAG	Bacteria	Desulfobacterota	Syntrophia	Syntrophales	UBA4778	UBA2207	UBA2207 sp002418885	1812	Yes
asm_GCA_002418895_1.LargeContigs	72.88	0.99	1205762	26	80514	40.6	No	0	0	3	Medium-Quality	MAG	Bacteria	Chloroflexota	Dehalococcoidia	Dehalococcoidales	UBA5760	UBA5760	UBA5760 sp002418895	718	Yes
asm_GCA_002418925_1.LargeContigs	95.59	0	1945070	141	24327	41.8	No	0	0	1	High-Quality	MAG	Bacteria	Bacillota_A	Clostridia	Tissierellales	Tissierellaceae_C	Gudongella	Gudongella oleilytica	1218	Yes
asm_GCA_002418945_1.LargeContigs	92.26	4.52	3021561	92	44609	41.5	No	0	0	3	High-Quality	MAG	Bacteria	Desulfobacterota_G	Syntrophorhabdia	Syntrophorhabdales	Syntrophorhabdaceae	UBA5609	UBA5609 sp002418945	1819	Yes
asm_GCA_002418965_1.LargeContigs	89.12	0.95	1937085	25	318767	38.5	Yes	1	0	6	Medium-Quality	MAG	Bacteria	Bacillota_B	Dehalobacteriia	UBA4068	UBA4068	UBA5757	UBA5757 sp002418965	2508	Yes
asm_GCA_002418985_1.LargeContigs	95.38	3.23	3423753	166	34236	40.3	No	0	0	3	High-Quality	MAG	Bacteria	Desulfobacterota_G	Syntrophorhabdia	Syntrophorhabdales	Syntrophorhabdaceae	Delta-02	Delta-02 sp002418985	1821	Yes
asm_GCA_002419005_1.LargeContigs	90.9	0.46	1510170	16	162774	38.3	No	0	0	1	High-Quality	MAG	Bacteria	Bacillota_B	Dehalobacteriia	UBA4068	UBA5755	UBA5755	UBA5755 sp002419005	999	Yes
asm_GCA_002419025_1.LargeContigs	80.36	0.6	1885320	100	29999	40.5	Yes	1	0	1	Medium-Quality	MAG	Bacteria	Desulfobacterota	Dissulfuribacteria	Dissulfuribacterales	UBA5754	UBA5754	UBA5754 sp002419025	861	Yes
asm_GCA_002419045_1.LargeContigs	93.76	2.26	2588094	88	44473	41	No	0	0	2	High-Quality	MAG	Bacteria	Desulfobacterota	Syntrophia	Syntrophales	UBA4778	UBA4054	UBA4054 sp002383495	1813	No
asm_GCA_002419055_1.LargeContigs	91.94	0.7	2057705	22	246492	38	No	0	0	1	High-Quality	MAG	Bacteria	Bacillota_B	Dehalobacteriia	UBA4068	UBA4068	UBA4068	UBA4068 sp002419055	449	Yes
asm_GCA_002419085_1.LargeContigs	75.44	1.75	3163913	212	21281	39.2	No	0	0	0	Medium-Quality	MAG	Bacteria	Desulfobacterota	Desulfobulbia	Desulfobulbales	Desulfocapsaceae	Desulfoprunum	Desulfoprunum sp000769715	1543	Yes
asm_GCA_002419125_1.LargeContigs	90.7	0	635623	58	16347	41.9	No	0	0	1	High-Quality	MAG	Bacteria	Patescibacteria	Dojkabacteria	SC72	SC72	UBA2259	UBA2259 sp002419125	2200	Yes
asm_GCA_002419135_1.LargeContigs	90.26	0	1308437	49	40731	40	No	0	1	0	High-Quality	MAG	Bacteria	Chloroflexota	Dehalococcoidia	Dehalococcoidales	UBA5627	UBA5627	UBA5627 sp002419135	63	Yes
asm_GCA_002419145_1.LargeContigs	95.74	0.71	2311552	93	42221	35.2	No	0	0	1	High-Quality	MAG	Bacteria	Bacillota_A	Clostridia	Saccharofermentanales	UBA5734	UBA5734	UBA5734 sp002419145	388	Yes
asm_GCA_002419185_1.LargeContigs	61.65	1.48	1268758	128	13461	36.9	No	0	0	0	Medium-Quality	MAG	Bacteria	Spirochaetota	Spirochaetia	Treponematales	Rectinemataceae	Rectinema	Rectinema sp002435985	135	No
asm_GCA_002419195_1.LargeContigs	83.54	1.71	2185264	73	53837	39	No	0	0	0	Medium-Quality	MAG	Bacteria	Bacillota_B	Peptococcia	DRI-13	UBA5745	UBA5745	UBA5745 sp002435905	2338	No
asm_GCA_002419205_1.LargeContigs	79.36	4.03	3164175	115	45142	41	No	0	0	0	Medium-Quality	MAG	Bacteria	Bacillota_A	Clostridia	Clostridiales	Clostridiaceae	Youngiibacter	Youngiibacter fragilis	2073	No
asm_GCA_002419215_1.LargeContigs	86.27	2.1	3466480	154	37622	39.6	No	0	0	3	Medium-Quality	MAG	Bacteria	Desulfobacterota	Syntrophia	Syntrophales	UBA4778	UBA2192	UBA2192 sp002419215	1815	Yes
asm_GCA_002419265_1.LargeContigs	97.67	2.33	551908	14	46406	42.7	No	0	1	0	High-Quality	MAG	Bacteria	Patescibacteria	Paceibacteria	Paceibacterales	UBA5633	UBA5633	UBA5633 sp002452735	210	No
asm_GCA_002419285_1.LargeContigs	81.79	1.88	2538597	160	28050	39.3	No	0	0	0	Medium-Quality	MAG	Bacteria	Bacteroidota	Bacteroidia	Bacteroidales	Prolixibacteraceae	UBA1413	UBA1413 sp002419285	150	Yes
asm_GCA_002419295_1.LargeContigs	95.35	4.65	850401	36	53347	39.2	Yes	1	0	1	High-Quality	MAG	Bacteria	Patescibacteria	Paceibacteria	Paceibacterales	UBA5738	UBA5738	UBA5738 sp002419295	1189	Yes
asm_GCA_002419305_1.LargeContigs	84.49	0.55	2741364	167	30632	38.7	No	0	0	0	Medium-Quality	MAG	Bacteria	Bacteroidota	Bacteroidia	Bacteroidales	Dysgonomonadaceae	Proteiniphilum	Proteiniphilum sp002383605	687	No
asm_GCA_002419345_1.LargeContigs	93.81	2.38	3323426	26	179593	38.4	Yes	1	0	0	High-Quality	MAG	Bacteria	Bacteroidota	Bacteroidia	Bacteroidales	VadinHA17	SR-FBR-E99	SR-FBR-E99 sp002403305	95	No
asm_GCA_002419365_1.LargeContigs	95.04	2.48	2697096	124	30739	35.5	Yes	1	0	1	High-Quality	MAG	Bacteria	Bacillota_A	Clostridia	Saccharofermentanales	UBA5734	UBA5734	UBA5734 sp002419365	389	Yes
asm_GCA_002419375_1.LargeContigs	90.6	0	2074900	22	174839	38.4	Yes	1	0	1	High-Quality	MAG	Bacteria	Bacillota_A	Clostridia	Lachnospirales	Vallitaleaceae	UBA4080	UBA4080 sp002381865	1860	No
asm_GCA_002419385_1.LargeContigs	84.19	1.94	3077684	70	68069	39.5	No	0	1	0	Medium-Quality	MAG	Bacteria	Desulfobacterota_F	Desulfuromonadia	Geobacterales	Geobacteraceae	RPRC01	RPRC01 sp002419385	1521	Yes
asm_GCA_002419425_1.LargeContigs	97.81	0	2405020	53	94095	38.4	No	0	0	1	High-Quality	MAG	Bacteria	Bacteroidota	Bacteroidia	Bacteroidales	Dysgonomonadaceae	Seramator	Seramator thermalis	690	Yes
asm_GCA_002419445_1.LargeContigs	90.67	0	1242301	125	13748	37.5	No	0	0	0	High-Quality	MAG	Bacteria	Bacillota	Bacilli	Izemoplasmatales	UBA5603	UBA2289	UBA2289 sp002419445	2350	Yes
asm_GCA_002419455_1.LargeContigs	94.92	0	1883261	94	31534	44	No	0	0	0	High-Quality	MAG	Bacteria	Synergistota	Synergistia	Synergistales	Thermovirgaceae	UBA4066	UBA4066 sp002383685	650	No
asm_GCA_002419465_1.LargeContigs	97.42	0.65	2626593	19	236909	37.3	No	0	0	6	High-Quality	MAG	Bacteria	Desulfobacterota_F	Desulfuromonadia	Geobacterales	Pseudopelobacteraceae	Trichlorobacter	Trichlorobacter sp002419465	1311	Yes
asm_GCA_002419505_1.LargeContigs	90.67	0	1592682	38	78613	37.3	No	0	0	3	High-Quality	MAG	Bacteria	Bacillota	Bacilli	Izemoplasmatales	UBA5603	UBA2289	UBA2289 sp002419505	2352	Yes
asm_GCA_002419525_1.LargeContigs	83.82	1.94	2563339	91	46182	40.1	No	0	0	9	Medium-Quality	MAG	Bacteria	Desulfobacterota	Syntrophia	Syntrophales	Syntrophaceae	Syntrophus	Syntrophus aciditrophicus	1180	Yes
asm_GCA_002419535_1.LargeContigs	100	0.97	2634850	32	106317	35.8	Yes	1	0	3	High-Quality	MAG	Bacteria	Campylobacterota	Campylobacteria	Campylobacterales	Sulfurospirillaceae	Sulfurospirillum	Sulfurospirillum sp000743525	2218	Yes
asm_GCA_002419545_1.LargeContigs	59.75	0	1747653	203	11537	38.8	No	0	1	3	Medium-Quality	MAG	Bacteria	Chloroflexota	Anaerolineae	Anaerolineales	Anaerolineaceae	UBA6170	UBA6170 sp002840735	2470	No
asm_GCA_002419585_1.LargeContigs	88.59	0.89	3752786	41	153131	39	No	0	0	1	Medium-Quality	MAG	Bacteria	Bacillota_A	Clostridia	Lachnospirales	Lachnospiraceae	Velocimicrobium	Velocimicrobium sp002419585	68	Yes
asm_GCA_002421025_1.LargeContigs	96.56	0.49	2800208	142	28870	35.2	No	0	0	3	High-Quality	MAG	Bacteria	Pseudomonadota	Gammaproteobacteria	Pseudomonadales	Moraxellaceae	Acinetobacter	Acinetobacter radioresistens	464	No
asm_GCA_002421365_1.LargeContigs	96.97	0.89	1595630	83	30556	36.2	No	0	0	0	High-Quality	MAG	Bacteria	Bacillota	Bacilli	Acholeplasmatales	Acholeplasmataceae	UBA2284	UBA2284 sp002418725	2501	No
asm_GCA_002421385_1.LargeContigs	88.77	0	2773920	16	269483	35.3	No	0	0	6	Medium-Quality	MAG	Bacteria	Pseudomonadota	Gammaproteobacteria	Pseudomonadales	Moraxellaceae	Acinetobacter	Acinetobacter radioresistens	464	No
asm_GCA_002421405_1.LargeContigs	70.82	1.33	1212919	139	13507	36.5	No	0	0	3	Medium-Quality	MAG	Bacteria	Bacillota	Bacilli	Izemoplasmatales	UBA5603	UBA5603	UBA5603 sp002421405	2369	Yes
asm_GCA_002421425_1.LargeContigs	96.61	1.69	1622116	26	110925	42.3	No	0	0	4	High-Quality	MAG	Bacteria	WOR-3	Hydrothermia	UBA1063	UBA1063	UBA1063	UBA1063 sp002421425	2181	Yes
asm_GCA_002421445_1.LargeContigs	76.4	0	1272501	159	10091	38	No	0	0	3	Medium-Quality	MAG	Bacteria	Chloroflexota	Dehalococcoidia	GIF9	UBA5629	UBA5629	UBA5629 sp002421445	1825	Yes
asm_GCA_002421465_1.LargeContigs	93.02	0	536270	49	13325	43.2	No	0	0	4	High-Quality	MAG	Bacteria	Patescibacteria	Paceibacteria	Paceibacterales	UBA5633	UBA5633	UBA5633 sp002452735	210	Yes
asm_GCA_002421475_1.LargeContigs	76.72	3.45	2007832	235	10930	34.3	No	0	0	9	Medium-Quality	MAG	Bacteria	Pseudomonadota	Gammaproteobacteria	Thiomicrospirales	Thiomicrospiraceae	Thiomicrospira	Thiomicrospira sp002421475	788	Yes
asm_GCA_002421505_1.LargeContigs	81.59	1.39	2483492	173	22800	41	No	0	0	1	Medium-Quality	MAG	Bacteria	Bacillota_B	Desulfotomaculia	Desulfotomaculales	Nap2-2B	46-80	46-80 sp002418775	1133	No
asm_GCA_002421525_1.LargeContigs	86.05	0	861952	102	12803	42.1	No	0	1	3	Medium-Quality	MAG	Bacteria	Patescibacteria	Paceibacteria	Moranbacterales	UBA2193	UBA2193	UBA2193 sp002327335	2155	No
asm_GCA_002421565_1.LargeContigs	53.42	0	1795864	197	11730	37	No	0	0	4	Medium-Quality	MAG	Bacteria	Desulfobacterota	Desulfobulbia	Desulfobulbales	Desulfurivibrionaceae	UBA5628	UBA5628 sp002421565	1198	Yes
asm_GCA_002421585_1.LargeContigs	86.95	0	1234695	123	13270	39.7	No	0	0	5	Medium-Quality	MAG	Bacteria	Chloroflexota	Dehalococcoidia	Dehalococcoidales	UBA5627	UBA5627	UBA5627 sp002421585	64	Yes
asm_GCA_002421625_1.LargeContigs	83.07	0.09	1714493	127	18523	36.4	No	0	0	2	Medium-Quality	MAG	Bacteria	Bacillota	Bacilli	Erysipelotrichales	Erysipelotrichaceae	UBA2212	UBA2212 sp002402585	2366	No
asm_GCA_002422045_1.LargeContigs	84.53	0.44	1670151	142	15105	36.4	No	0	0	0	Medium-Quality	MAG	Bacteria	Bacillota	Bacilli	Acholeplasmatales	Acholeplasmataceae	UBA2284	UBA2284 sp002422045	202	Yes
asm_GCA_002422065_1.LargeContigs	96.89	5.7	2490275	290	10740	36.3	No	0	0	1	Medium-Quality	MAG	Bacteria	Bacillota	Bacilli	Erysipelotrichales	Erysipelotrichaceae	UBA6182	UBA6182 sp002422065	2437	Yes
asm_GCA_002422125_1.LargeContigs	82.74	0.1	3372680	385	12021	39	No	0	1	0	Medium-Quality	MAG	Bacteria	UBP17	UBA6191	UBA6191	UBA6191	UBA6191	UBA6191 sp002422125	2456	Yes
asm_GCA_002422165_1.LargeContigs	95.35	0	991356	11	142300	34.1	No	0	1	0	High-Quality	MAG	Bacteria	Patescibacteria	Microgenomatia	UBA1400	PJMF01	UBA1364	UBA1364 sp002422165	71	Yes
asm_GCA_002422175_1.LargeContigs	83.64	2.36	2161144	210	14725	34.9	No	0	0	1	Medium-Quality	MAG	Bacteria	Pseudomonadota	Gammaproteobacteria	Burkholderiales	Burkholderiaceae_C	Algicoccus	Algicoccus sp002422175	185	Yes
asm_GCA_002422205_1.LargeContigs	95.99	2.15	2178574	52	70395	34.1	No	0	0	0	High-Quality	MAG	Bacteria	Pseudomonadota	Alphaproteobacteria	Rickettsiales	UBA3002	UBA6178	UBA6178 sp002422205	1263	Yes
asm_GCA_002422225_1.LargeContigs	63.68	0	2637683	216	18323	34.9	No	0	0	1	Medium-Quality	MAG	Bacteria	Pseudomonadota	Gammaproteobacteria	Pseudomonadales	Pseudohongiellaceae	Pseudohongiella	Pseudohongiella sp002422225	515	Yes
asm_GCA_002422245_1.LargeContigs	68.86	2	2090923	188	17858	38.7	No	0	0	0	Medium-Quality	MAG	Bacteria	Chloroflexota	Anaerolineae	Anaerolineales	Anaerolineaceae	UBA6170	UBA6170 sp002840735	2470	No
asm_GCA_002422265_1.LargeContigs	73.68	0	2832988	226	18036	36.5	No	0	0	1	Medium-Quality	MAG	Bacteria	Desulfobacterota_F	Desulfuromonadia	Geobacterales	Pseudopelobacteraceae	Trichlorobacter	Trichlorobacter sp002422265	1314	Yes
asm_GCA_002422285_1.LargeContigs	51.72	0	1987215	124	22851	38.4	No	0	0	0	Medium-Quality	MAG	Bacteria	Bacteroidota	Bacteroidia	Flavobacteriales	Crocinitomicaceae	UBA6165	UBA6165 sp002422285	2455	Yes
asm_GCA_002422305_1.LargeContigs	100	0	1446069	76	27021	27.6	No	0	0	0	High-Quality	MAG	Bacteria	Patescibacteria	JAEDAM01	BD1-5	UBA6164	UBA6164	UBA6164 sp002422305	2399	No
asm_GCA_002422315_1.LargeContigs	91.26	0.55	2989533	87	68577	38.8	No	0	0	0	High-Quality	MAG	Bacteria	Bacteroidota	Bacteroidia	NS11-12g	UBA955	UBA6161	UBA6161 sp002422315	1882	Yes
asm_GCA_002422345_1.LargeContigs	71.74	0.5	4628166	235	36370	34.5	No	0	0	1	Medium-Quality	MAG	Bacteria	Pseudomonadota	Alphaproteobacteria	Acetobacterales	Acetobacteraceae	UBA6159	UBA6159 sp002422345	1703	Yes
asm_GCA_002422365_1.LargeContigs	81	0.84	1273710	47	47278	32.6	Yes	1	0	0	Medium-Quality	MAG	Bacteria	Pseudomonadota	Alphaproteobacteria	UBA1280	UBA6156	UBA6156	UBA6156 sp002422365	385	Yes
asm_GCA_002422375_1.LargeContigs	51.72	0	822813	57	22017	34.4	No	0	0	0	Medium-Quality	MAG	Bacteria	Actinomycetota	Actinomycetia	Nanopelagicales	S36-B12	UBA6154	UBA6154 sp002422375	1200	Yes
asm_GCA_002422395_1.LargeContigs	99.56	0.66	3187624	30	222530	35.6	No	0	0	2	High-Quality	MAG	Bacteria	Pseudomonadota	Gammaproteobacteria	Methylococcales	Methylomonadaceae	Methylovulum	Methylovulum sp002422395	1331	Yes
asm_GCA_002422425_1.LargeContigs	97.62	0.68	4248597	92	74105	37.9	No	0	0	2	High-Quality	MAG	Bacteria	Verrucomicrobiota	Verrucomicrobiae	Verrucomicrobiales	DEV007	Arctic95D-9	Arctic95D-9 sp002422425	116	Yes
asm_GCA_002422445_1.LargeContigs	66.38	0	2132517	98	38614	33.4	No	0	0	0	Medium-Quality	MAG	Bacteria	Pseudomonadota	Gammaproteobacteria	Burkholderiales	Rhodocyclaceae	Rugosibacter	Rugosibacter sp002424865	1571	No
asm_GCA_002422455_1.LargeContigs	51.72	0	1834214	119	27204	34.6	No	0	0	0	Medium-Quality	MAG	Bacteria	Pseudomonadota	Gammaproteobacteria	Burkholderiales	Burkholderiaceae_B	Rhodoferax	Rhodoferax sp002422455	748	Yes
asm_GCA_002422465_1.LargeContigs	91.96	4.94	2796886	154	27001	39.3	No	0	0	0	High-Quality	MAG	Bacteria	Bacillota_B	Peptococcia	DRI-13	DRI-13	UBA6129	UBA6129 sp002422465	1005	Yes
asm_GCA_002422505_1.LargeContigs	86.93	2.07	3175417	178	27978	36.9	No	0	0	1	Medium-Quality	MAG	Bacteria	Desulfobacterota	Desulfovibrionia	Desulfovibrionales	Desulfovibrionaceae	Humidesulfovibrio	Humidesulfovibrio sp002422505	1552	Yes
asm_GCA_002422525_1.LargeContigs	98.9	1.1	4508844	94	93665	35.7	No	0	0	0	High-Quality	MAG	Bacteria	Hydrogenedentota	Hydrogenedentia	Hydrogenedentiales	SLHB01	UBA6118	UBA6118 sp002422525	840	Yes
asm_GCA_002422535_1.LargeContigs	98.88	0	1359924	31	62814	36.1	No	0	0	0	High-Quality	MAG	Bacteria	Bacillota	Bacilli	RFN20	CAG-826	UBA6120	UBA6120 sp002422535	368	Yes
asm_GCA_002422545_1.LargeContigs	96.13	0.7	3583449	40	151109	40.1	No	0	0	0	High-Quality	MAG	Bacteria	Bacillota_A	Clostridia	Tissierellales	Sedimentibacteraceae	Sedimentibacter	Sedimentibacter sp002422545	2358	Yes
asm_GCA_002422585_1.LargeContigs	92.26	3.23	2546758	30	112636	37.2	No	0	0	0	High-Quality	MAG	Bacteria	Desulfobacterota_F	Desulfuromonadia	Geobacterales	Pseudopelobacteraceae	Trichlorobacter	Trichlorobacter sp002419465	1311	No
asm_GCA_002422725_1.LargeContigs	93.01	4.84	3688382	119	53475	38.9	No	0	0	1	High-Quality	MAG	Bacteria	Bacteroidota	Bacteroidia	Bacteroidales	F082	UBA6192	UBA6192 sp002422725	129	Yes
asm_GCA_002422745_1.LargeContigs	80.53	1.1	1763087	209	10769	32.9	No	0	0	1	Medium-Quality	MAG	Bacteria	Pseudomonadota	Alphaproteobacteria	Rickettsiales	UBA3002	UBA6189	UBA6189 sp002422745	1643	Yes
asm_GCA_002422765_1.LargeContigs	79.07	0	776431	66	16193	34.7	No	0	0	1	Medium-Quality	MAG	Bacteria	Patescibacteria	Microgenomatia	UBA1400	PJMF01	UBA1364	UBA1364 sp002422765	72	Yes
asm_GCA_002422785_1.LargeContigs	78.56	2.03	1312246	58	39250	35.7	No	0	0	0	Medium-Quality	MAG	Bacteria	Pseudomonadota	Gammaproteobacteria	UBA6186	UBA6186	UBA6186	UBA6186 sp002422785	2283	Yes
asm_GCA_002422795_1.LargeContigs	96.7	0	2365046	115	34614	37.5	No	0	0	2	High-Quality	MAG	Bacteria	Pseudomonadota	Alphaproteobacteria	Rickettsiales	UBA6187	UBA6187	UBA6187 sp002422795	2063	Yes
asm_GCA_002422825_1.LargeContigs	92.24	1.75	1953749	159	21349	41.7	No	0	0	1	High-Quality	MAG	Bacteria	Bacillota_A	Clostridia	Tissierellales	Tissierellaceae_C	Gudongella	Gudongella oleilytica	1218	No
asm_GCA_002422845_1.LargeContigs	89.78	1.61	1465155	103	24862	35.1	No	0	0	0	Medium-Quality	MAG	Bacteria	Pseudomonadota	Alphaproteobacteria	UBA6184	UBA6184	UBA6184	UBA6184 sp002422845	2382	Yes
asm_GCA_002422865_1.LargeContigs	96.4	1.59	3263409	105	57834	35.8	No	0	0	1	High-Quality	MAG	Bacteria	Bacteroidota	Bacteroidia	NS11-12g	UKL13-3	UBA6183	UBA6183 sp002422865	2469	Yes
asm_GCA_002422875_1.LargeContigs	84.6	1.42	1073326	34	55981	35.1	No	0	0	1	Medium-Quality	MAG	Bacteria	Pseudomonadota	Alphaproteobacteria	Rickettsiales	UBA6177	UBA6177	UBA6177 sp002422875	62	Yes
asm_GCA_002422905_1.LargeContigs	89.32	4.08	5403117	176	49806	38.7	No	0	0	0	Medium-Quality	MAG	Bacteria	Verrucomicrobiota	Verrucomicrobiae	Pedosphaerales	UBA9464	UBA6176	UBA6176 sp002422905	824	Yes
asm_GCA_002422915_1.LargeContigs	97.67	6.98	717764	4	240078	31.9	No	0	0	0	Medium-Quality	MAG	Bacteria	Patescibacteria	Saccharimonadia	Saccharimonadales	UBA1547	Microsaccharimonas	Microsaccharimonas sp002422915	90	Yes
asm_GCA_002422945_1.LargeContigs	82.75	0.43	2426797	99	45040	35	No	0	0	1	Medium-Quality	MAG	Bacteria	Pseudomonadota	Alphaproteobacteria	Sphingomonadales	Sphingomonadaceae	Aquisediminimonas_A	Aquisediminimonas_A sp002422945	1770	Yes
asm_GCA_002422955_1.LargeContigs	94.42	0	5196061	347	23151	36.5	Yes	1	0	0	High-Quality	MAG	Bacteria	Planctomycetota	Planctomycetia	Pirellulales	Pirellulaceae	UBA6163	UBA6163 sp002422955	117	Yes
asm_GCA_002422985_1.LargeContigs	79.43	2.83	1960687	118	26821	33.6	No	0	0	1	Medium-Quality	MAG	Bacteria	Pseudomonadota	Alphaproteobacteria	Sphingomonadales	Sphingomonadaceae	Sandaracinobacteroides	Sandaracinobacteroides sp002422985	887	Yes
asm_GCA_002422995_1.LargeContigs	63.77	0.22	1749802	165	13598	33.7	No	0	0	1	Medium-Quality	MAG	Bacteria	Pseudomonadota	Gammaproteobacteria	Burkholderiales	Rhodocyclaceae	Rugosibacter	Rugosibacter sp002422995	1572	Yes
asm_GCA_002423025_1.LargeContigs	89.94	1.74	3016302	51	98873	33.5	No	0	0	1	Medium-Quality	MAG	Bacteria	Pseudomonadota	Alphaproteobacteria	Sphingomonadales	Sphingomonadaceae	Polymorphobacter	Polymorphobacter sp002423025	1698	Yes
asm_GCA_002423035_1.LargeContigs	94.29	1.21	4245855	140	52089	35.7	No	0	0	0	High-Quality	MAG	Bacteria	Pseudomonadota	Gammaproteobacteria	Chromatiales	Chromatiaceae	Thiocapsa	Thiocapsa sp002423035	1524	Yes
asm_GCA_002423065_1.LargeContigs	88.68	0.63	2237978	91	48633	39	No	0	0	2	Medium-Quality	MAG	Bacteria	Bacillota_B	Desulfotomaculia	Desulfotomaculales	Nap2-2B	SCADC1-2-3	SCADC1-2-3 sp000681355	536	Yes
asm_GCA_002423075_1.LargeContigs	71.57	1.26	1877557	153	19229	31.7	Yes	1	0	1	Medium-Quality	MAG	Bacteria	Actinomycetota	Actinomycetia	Actinomycetales	Microbacteriaceae	Chryseoglobus	Chryseoglobus sp002423075	1459	Yes
asm_GCA_002423105_1.LargeContigs	79.82	0	3551233	68	89286	37	No	0	0	0	Medium-Quality	MAG	Bacteria	Desulfobacterota_F	Desulfuromonadia	Geobacterales	Pseudopelobacteraceae	Trichlorobacter	Trichlorobacter sp002423105	1310	Yes
asm_GCA_002423125_1.LargeContigs	94.15	0.39	2208737	64	68962	35.1	No	0	0	0	High-Quality	MAG	Bacteria	Pseudomonadota	Gammaproteobacteria	Legionellales	Legionellaceae	UBA11403	UBA11403 sp002423125	1371	Yes
asm_GCA_002423145_1.LargeContigs	60	1.33	1285504	19	144715	35.4	No	0	0	0	Medium-Quality	MAG	Bacteria	Bacillota	Bacilli	Acholeplasmatales	UBA5453	Paracholeplasma	Paracholeplasma sp002423145	986	Yes
asm_GCA_002423155_1.LargeContigs	97.8	0	2098247	60	54803	35.5	No	0	0	0	High-Quality	MAG	Bacteria	Pseudomonadota	Alphaproteobacteria	Rickettsiales	UBA998	UBA6149	UBA6149 sp002423155	562	Yes
asm_GCA_002423185_1.LargeContigs	93.64	2.39	2687543	6	804124	34.4	No	0	0	1	High-Quality	MAG	Bacteria	Pseudomonadota	Alphaproteobacteria	Micavibrionales	Micavibrionaceae	UBA6147	UBA6147 sp002423185	2343	Yes
asm_GCA_002423205_1.LargeContigs	92.08	0.8	1939666	30	513813	33.8	No	0	0	1	High-Quality	MAG	Bacteria	Pseudomonadota	Alphaproteobacteria	Micavibrionales	Micavibrionaceae	UBA6145	UBA6145 sp002423205	1758	Yes
asm_GCA_002423225_1.LargeContigs	80	0	1570317	131	19851	36.5	No	0	0	0	Medium-Quality	MAG	Bacteria	Bacillota	Bacilli	Erysipelotrichales	Erysipelotrichaceae	UBA2212	UBA2212 sp002402585	2366	No
asm_GCA_002423245_1.LargeContigs	84.14	0	3124578	88	50470	34.4	No	0	0	0	Medium-Quality	MAG	Bacteria	Pseudomonadota	Alphaproteobacteria	Rhodobacterales	Rhodobacteraceae	Frigidibacter	Frigidibacter sp002423245	1737	Yes
asm_GCA_002423265_1.LargeContigs	83.46	0.6	1755988	147	16398	35.7	No	0	0	1	Medium-Quality	MAG	Bacteria	Pseudomonadota	Gammaproteobacteria	Burkholderiales	Methylophilaceae	UBA6140	UBA6140 sp002423265	1307	Yes
asm_GCA_002423285_1.LargeContigs	87.61	1.01	2296257	62	61895	35	Yes	1	0	0	Medium-Quality	MAG	Bacteria	Pseudomonadota	Alphaproteobacteria	Micavibrionales	Micavibrionaceae	Micavibrio	Micavibrio sp002423285	1760	Yes
asm_GCA_002423305_1.LargeContigs	80.1	0.35	2447003	250	13324	37.2	No	0	0	1	Medium-Quality	MAG	Bacteria	Pseudomonadota	Gammaproteobacteria	Methylococcales	Methylococcaceae	UBA6136	UBA6136 sp002423305	2505	Yes
asm_GCA_002423325_1.LargeContigs	76.76	2.91	3286823	242	20510	35.3	No	0	0	0	Medium-Quality	MAG	Bacteria	Chloroflexota	Anaerolineae	UBA1429	UBA1429	UBA6128	UBA6128 sp002423325	321	Yes
asm_GCA_002423365_1.LargeContigs	76.34	1.13	3368178	399	10560	38.4	No	0	0	0	Medium-Quality	MAG	Bacteria	Desulfobacterota_F	Desulfuromonadia	Desulfuromonadales	Trichloromonadaceae	Trichloromonas	Trichloromonas sp002423365	1234	Yes
asm_GCA_002423385_1.LargeContigs	95.52	2	5016015	255	28968	36.6	No	0	0	0	High-Quality	MAG	Bacteria	Wallbacteria	UBA9980	UBA9980	UBA9980	UBA9980	UBA9980 sp002423385	1199	Yes
asm_GCA_002423395_1.LargeContigs	83.84	0.7	1870031	9	303634	38.2	No	0	0	1	Medium-Quality	MAG	Bacteria	Bacillota_A	Clostridia	Eubacteriales	UBA1433	UBA1433	UBA1433 sp002423395	427	Yes
asm_GCA_002423425_1.LargeContigs	81.78	0.06	1844795	66	55852	40.4	No	0	0	1	Medium-Quality	MAG	Bacteria	Bacillota_B	Desulfitobacteriia	Desulfitobacteriales	Syntrophobotulaceae	UBA6116	UBA6116 sp002423425	181	Yes
asm_GCA_002423435_1.LargeContigs	94.63	3.19	4356900	43	156432	40.2	No	0	0	0	High-Quality	MAG	Bacteria	Bacillota_A	Clostridia	Oscillospirales	Butyricicoccaceae	UBA6114	UBA6114 sp002423435	630	Yes
asm_GCA_002423465_1.LargeContigs	83.53	3.23	3181920	87	60306	40.1	No	0	0	0	Medium-Quality	MAG	Bacteria	Desulfobacterota	Syntrophia	Syntrophales	UBA5619	UBA5619	UBA5619 sp002423465	926	Yes
asm_GCA_002423485_1.LargeContigs	86.01	4.63	4705588	88	82137	38.6	No	0	0	2	Medium-Quality	MAG	Bacteria	Eremiobacterota	Xenobia	Xenobiales	Xenobiaceae	Xenobium	Xenobium occultum	1130	Yes
asm_GCA_002423495_1.LargeContigs	86.84	4.55	2336206	103	43811	36.6	No	0	0	1	Medium-Quality	MAG	Bacteria	Chloroflexota	Anaerolineae	Anaerolineales	Anaerolineaceae	T78	T78 sp002423495	675	Yes
asm_GCA_002423525_1.LargeContigs	82.73	2.48	2148976	235	13122	38	No	0	0	1	Medium-Quality	MAG	Bacteria	Bacteroidota	Kapabacteria	Kapabacteriales	UBA2268	UBA2268	UBA2268 sp002418685	2473	No
asm_GCA_002423545_1.LargeContigs	84.97	1.58	3557814	61	90143	36.2	Yes	1	0	1	Medium-Quality	MAG	Bacteria	Actinomycetota	Thermoleophilia	UBA2241	UBA2241	UBA6103	UBA6103 sp002423545	1206	Yes
asm_GCA_002423555_1.LargeContigs	97.67	2.33	883706	67	16964	39.1	Yes	1	1	1	High-Quality	MAG	Bacteria	Patescibacteria	Paceibacteria	Paceibacterales	UBA5738	UBA5738	UBA5738 sp002423555	1190	Yes
asm_GCA_002423585_1.LargeContigs	96.67	2.5	2258343	19	191674	34.9	No	0	0	1	High-Quality	MAG	Bacteria	Actinomycetota	Coriobacteriia	OPB41	UBA2279	UBA6100	UBA6100 sp002423585	1443	Yes
asm_GCA_002423605_1.LargeContigs	86.8	0.99	1655042	34	99010	38.9	No	0	1	2	Medium-Quality	MAG	Bacteria	Chloroflexota	Dehalococcoidia	GIF9	UBA5620	UBA5620	UBA5620 sp002423605	40	Yes
asm_GCA_002423615_1.LargeContigs	93.55	2.96	3659335	121	47957	41.6	No	0	0	1	High-Quality	MAG	Bacteria	Desulfobacterota	Desulfobacteria	Desulfobacterales	UBA5616	UBA5616	UBA5616 sp002423615	1324	Yes
asm_GCA_002423645_1.LargeContigs	79.07	0	641079	66	12569	38.4	No	0	1	2	Medium-Quality	MAG	Bacteria	Patescibacteria	Microgenomatia	UBA12405	UBA12405	UBA5615	UBA5615 sp002382075	52	No
asm_GCA_002423905_1.LargeContigs	83.9	0.26	1820243	129	20622	33.3	No	0	0	1	Medium-Quality	MAG	Bacteria	Pseudomonadota	Gammaproteobacteria	Enterobacterales_A	Alteromonadaceae	Pseudidiomarina	Pseudidiomarina sp002423905	806	Yes
asm_GCA_002424475_1.LargeContigs	99.59	0	1519349	9	237811	37.3	No	0	0	1	High-Quality	MAG	Bacteria	Campylobacterota	Campylobacteria	Campylobacterales	Sulfurovaceae	BN30871	BN30871 sp002424475	2232	Yes
asm_GCA_002424495_1.LargeContigs	83.26	2.47	4020740	456	12088	41.4	No	0	0	0	Medium-Quality	MAG	Bacteria	Desulfobacterota	DSM-4660	Desulfatiglandales	Desulfatiglandaceae	UBA5623	UBA5623 sp002424495	1838	Yes
asm_GCA_002424525_1.LargeContigs	91.4	2.06	3724438	259	22853	40.7	No	0	0	1	High-Quality	MAG	Bacteria	Bacteroidota	Bacteroidia	Bacteroidales	VadinHA17	LD21	LD21 sp002424525	85	Yes
asm_GCA_002424545_1.LargeContigs	80.27	4.03	2604462	135	29723	40.1	No	0	0	2	Medium-Quality	MAG	Bacteria	Desulfobacterota	Syntrophia	Syntrophales	UBA5619	UBA5619	UBA5619 sp002424545	927	Yes
asm_GCA_002424565_1.LargeContigs	71.43	0	1467482	93	19184	39.6	Yes	1	0	2	Medium-Quality	MAG	Bacteria	WOR-3	32-111	32-111	32-111	UBA2202	UBA2202 sp002327905	82	No
asm_GCA_002424575_1.LargeContigs	86.43	0.44	1501767	131	17996	36.4	No	0	0	1	Medium-Quality	MAG	Bacteria	Bacillota	Bacilli	Acholeplasmatales	Acholeplasmataceae	UBA2284	UBA2284 sp002424575	2502	Yes
asm_GCA_002424605_1.LargeContigs	63.67	1.1	1941481	14	357456	36.9	No	0	0	1	Medium-Quality	MAG	Bacteria	Cloacimonadota	Cloacimonadia	Cloacimonadales	Cloacimonadaceae	UBA5614	UBA5614 sp002424605	1329	Yes
asm_GCA_002424625_1.LargeContigs	86.57	0	2382461	144	28770	37.1	No	0	0	1	Medium-Quality	MAG	Bacteria	Desulfobacterota_F	Desulfuromonadia	Desulfuromonadales	UBA2197	UBA2197	UBA2197 sp002424625	1233	Yes
asm_GCA_002424635_1.LargeContigs	70.18	0.88	2948531	95	61595	37	No	0	0	1	Medium-Quality	MAG	Bacteria	Desulfobacterota	Desulfobulbia	Desulfobulbales	Desulfocapsaceae	UBA2270	UBA2270 sp002424635	1182	Yes
asm_GCA_002424645_1.LargeContigs	76.63	1.54	2700802	168	29636	39.6	No	0	0	1	Medium-Quality	MAG	Bacteria	Desulfobacterota_F	Desulfuromonadia	Desulfuromonadales	Syntrophotaleaceae	Syntrophotalea	Syntrophotalea sp002424645	1328	Yes
asm_GCA_002424655_1.LargeContigs	81.76	2.46	3216914	251	18325	39.6	No	0	0	2	Medium-Quality	MAG	Bacteria	Desulfobacterota	Syntrophia	Syntrophales	UBA4778	UBA2192	UBA2192 sp002327315	1814	No
asm_GCA_002424705_1.LargeContigs	50.18	0	1520862	118	19112	36.8	No	0	0	1	Medium-Quality	MAG	Bacteria	Desulfobacterota_F	Desulfuromonadia	Geobacterales	Pseudopelobacteraceae	Trichlorobacter	Trichlorobacter sp002424705	1313	Yes
asm_GCA_002424715_1.LargeContigs	90.44	4.84	3043755	148	31391	41.3	No	0	0	0	High-Quality	MAG	Bacteria	Desulfobacterota_G	Syntrophorhabdia	Syntrophorhabdales	Syntrophorhabdaceae	UBA5609	UBA5609 sp002428485	1818	No
asm_GCA_002424725_1.LargeContigs	91.28	0	3330969	316	13563	38.1	Yes	1	0	1	High-Quality	MAG	Bacteria	Acidobacteriota	Thermoanaerobaculia	UBA2201	UBA2201	UBA2201	UBA2201 sp002327305	880	Yes
asm_GCA_002424765_1.LargeContigs	97.42	1.29	2870057	86	64426	41	Yes	1	0	0	High-Quality	MAG	Bacteria	Desulfobacterota	Syntrophia	Syntrophales	UBA4778	UBA4054	UBA4054 sp002383495	1813	Yes
asm_GCA_002424785_1.LargeContigs	91.61	0.32	4675905	270	26556	39.5	Yes	1	0	1	High-Quality	MAG	Bacteria	Desulfobacterota	Desulfobacteria	Desulfobacterales	Desulfatirhabdiaceae	UBA4064	UBA4064 sp002382065	232	No
asm_GCA_002424805_1.LargeContigs	71.93	1.75	3028440	163	31124	39.2	No	0	0	0	Medium-Quality	MAG	Bacteria	Desulfobacterota	Desulfobulbia	Desulfobulbales	Desulfocapsaceae	Desulfoprunum	Desulfoprunum sp000769715	1543	No
asm_GCA_002424815_1.LargeContigs	96	1.33	1632112	28	80678	36.7	No	0	0	1	High-Quality	MAG	Bacteria	Bacillota	Bacilli	Izemoplasmatales	UBA5603	UBA5603	UBA5603 sp002424815	2351	Yes
asm_GCA_002424845_1.LargeContigs	78.37	1.44	2022865	97	33811	34.9	No	0	0	0	Medium-Quality	MAG	Bacteria	Pseudomonadota	Gammaproteobacteria	Burkholderiales	Thiobacillaceae	Thiobacillus	Thiobacillus denitrificans_F	1507	Yes
asm_GCA_002424865_1.LargeContigs	93.73	1.35	2468744	88	46752	33.7	No	0	0	0	High-Quality	MAG	Bacteria	Pseudomonadota	Gammaproteobacteria	Burkholderiales	Rhodocyclaceae	Rugosibacter	Rugosibacter sp002424865	1571	Yes
asm_GCA_002424885_1.LargeContigs	85.71	0	2339335	13	334700	40.2	Yes	1	0	0	Medium-Quality	MAG	Bacteria	Edwardsbacteria	AC1	AC1	EtOH8	UBA2226	UBA2226 sp001777915	877	Yes
asm_GCA_002424895_1.LargeContigs	65.77	0	1168152	81	21255	37.9	No	0	0	1	Medium-Quality	MAG	Bacteria	Bacillota	Bacilli	Izemoplasmatales	UBA5603	UBA2289	UBA2289 sp002419505	2352	No
asm_GCA_002424905_1.LargeContigs	93.16	1.42	1918998	88	42175	35.7	No	0	0	1	High-Quality	MAG	Bacteria	Campylobacterota	Campylobacteria	Campylobacterales	Sulfurimonadaceae	Sulfuricurvum	Sulfuricurvum sp000747095	2485	Yes
asm_GCA_002427615_1.LargeContigs	95.7	0.81	3016762	157	34765	37.3	No	0	0	0	High-Quality	MAG	Bacteria	Bacteroidota	Bacteroidia	Bacteroidales	Paludibacteraceae	Paludibacter	Paludibacter sp002427615	749	Yes
asm_GCA_002427655_1.LargeContigs	94.84	2.37	4898182	288	25370	39.5	Yes	1	0	1	High-Quality	MAG	Bacteria	Desulfobacterota	Desulfobacteria	Desulfobacterales	Desulfatirhabdiaceae	UBA4064	UBA4064 sp002382065	232	No
asm_GCA_002427685_1.LargeContigs	87.25	0	2187016	192	16184	35.9	No	0	0	0	Medium-Quality	MAG	Bacteria	Spirochaetota	Spirochaetia	Treponematales	Rectinemataceae	Rectinema	Rectinema subterraneum	132	Yes
asm_GCA_002428205_1.LargeContigs	85.1	1.76	5408352	463	16613	36.3	Yes	1	0	0	Medium-Quality	MAG	Bacteria	Planctomycetota	Planctomycetia	Pirellulales	Pirellulaceae	UBA6163	UBA6163 sp002428205	119	Yes
asm_GCA_002428215_1.LargeContigs	67.2	1.22	1791439	144	17806	38.1	No	0	0	0	Medium-Quality	MAG	Bacteria	Bacteroidota	Bacteroidia	Bacteroidales	Prolixibacteraceae	UBA1413	UBA1413 sp002428215	298	Yes
asm_GCA_002428225_1.LargeContigs	76.54	1.28	1986904	87	36208	34.9	No	0	0	0	Medium-Quality	MAG	Bacteria	Pseudomonadota	Alphaproteobacteria	Rhodobacterales	Rhodobacteraceae	Roseovarius	Roseovarius sp002428225	1749	No
asm_GCA_002428265_1.LargeContigs	89.73	1.79	3794516	34	324765	36.6	No	0	0	0	Medium-Quality	MAG	Bacteria	Bdellovibrionota	Bacteriovoracia	Bacteriovoracales	Bacteriovoracaceae	Bacteriovorax	Bacteriovorax sp002428265	533	Yes
asm_GCA_002428285_1.LargeContigs	97.67	0	805012	78	13654	40.4	Yes	2	1	0	High-Quality	MAG	Bacteria	Patescibacteria	Microgenomatia	UBA12405	UBA6130	UBA6130	UBA6130 sp002428285	2018	Yes
asm_GCA_002428295_1.LargeContigs	80.36	4.46	1995311	120	33135	38.5	No	0	0	0	Medium-Quality	MAG	Bacteria	Caldisericota	Caldisericia	UBA6126	UBA6126	UBA6126	UBA6126 sp002428295	734	Yes
asm_GCA_002428305_1.LargeContigs	97.38	0.18	3009018	50	100283	36.5	No	0	0	0	High-Quality	MAG	Bacteria	Bacteroidota	Bacteroidia	Flavobacteriales	Flavobacteriaceae	Flavobacterium	Flavobacterium sp002428305	2433	Yes
asm_GCA_002428325_1.LargeContigs	98.81	3.37	3564165	79	67137	40.6	Yes	1	0	1	High-Quality	MAG	Bacteria	UBP4	UBA4092	UBA4092	UBA4092	UBA4092	UBA4092 sp002428325	363	Yes
asm_GCA_002428365_1.LargeContigs	87.02	1.55	2835092	52	100635	32.9	No	0	0	1	Medium-Quality	MAG	Bacteria	Actinomycetota	Actinomycetia	Propionibacteriales	Propionibacteriaceae	Propionicimonas	Propionicimonas sp002428365	1789	Yes
asm_GCA_002428385_1.LargeContigs	72.01	0.97	2142204	69	58006	40.7	Yes	1	0	0	Medium-Quality	MAG	Bacteria	Bacteroidota	Bacteroidia	Bacteroidales	VadinHA17	LD21	LD21 sp002428385	103	No
asm_GCA_002428405_1.LargeContigs	56.36	0	1590662	82	32341	39	No	0	0	0	Medium-Quality	MAG	Bacteria	Bacillota_A	Clostridia	Christensenellales	CAG-74	DTU024	DTU024 sp002428405	862	Yes
asm_GCA_002428415_1.LargeContigs	78.36	2.96	2869958	114	41605	40.8	No	0	0	0	Medium-Quality	MAG	Bacteria	Bacillota_A	Clostridia	Clostridiales	Clostridiaceae	Youngiibacter	Youngiibacter sp002428415	2075	Yes
asm_GCA_002428445_1.LargeContigs	95.81	8.63	4194649	98	82152	39.1	No	0	0	0	Medium-Quality	MAG	Bacteria	Desulfobacterota	Syntrophia	Syntrophales	UBA6109	UBA6109	UBA6109 sp002428445	273	Yes
asm_GCA_002428455_1.LargeContigs	79.39	4	2213233	93	38095	36.7	No	0	0	1	Medium-Quality	MAG	Bacteria	Chloroflexota	Anaerolineae	Anaerolineales	Anaerolineaceae	UBA6107	UBA6107 sp002428455	609	Yes
asm_GCA_002428485_1.LargeContigs	90.97	3.87	3290879	55	99421	41.2	No	0	0	0	High-Quality	MAG	Bacteria	Desulfobacterota_G	Syntrophorhabdia	Syntrophorhabdales	Syntrophorhabdaceae	UBA5609	UBA5609 sp002428485	1818	Yes
asm_GCA_002428495_1.LargeContigs	100	0	2153460	31	120058	41.5	No	0	0	0	High-Quality	MAG	Bacteria	Synergistota	Synergistia	Synergistales	Synergistaceae	Syner-03	Syner-03 sp002428495	763	Yes
asm_GCA_002428525_1.LargeContigs	94.44	0	2503486	35	120836	40.1	No	0	0	0	High-Quality	MAG	Bacteria	UBP14	UBA6098	UBA6098	UBA6098	UBA6098	UBA6098 sp002428525	362	Yes
asm_GCA_002428535_1.LargeContigs	82.95	0	2204410	111	39098	38	Yes	1	0	0	Medium-Quality	MAG	Bacteria	Spirochaetota	Spirochaetia	Sphaerochaetales	Sphaerochaetaceae	Sphaerochaeta	Sphaerochaeta sp002432715	149	Yes
asm_GCA_002428565_1.LargeContigs	84.55	2.91	4145362	78	88877	35.1	Yes	1	1	1	Medium-Quality	MAG	Bacteria	Chloroflexota	Anaerolineae	Anaerolineales	UBA4823	UBA6092	UBA6092 sp002428565	614	Yes
asm_GCA_002428575_1.LargeContigs	83.15	0.97	2815191	247	16605	40.6	No	0	0	0	Medium-Quality	MAG	Bacteria	Desulfobacterota_G	Syntrophorhabdia	Syntrophorhabdales	Syntrophorhabdaceae	Delta-02	Delta-02 sp002418985	1821	No
asm_GCA_002428605_1.LargeContigs	81.3	3.02	2740766	104	41204	40.8	No	0	0	0	Medium-Quality	MAG	Bacteria	Bacillota_A	Clostridia	Clostridiales	Clostridiaceae	Youngiibacter	Youngiibacter sp002428605	2074	No
asm_GCA_002428625_1.LargeContigs	63.64	0	3872502	36	143252	38.2	No	0	0	0	Medium-Quality	MAG	Bacteria	Spirochaetota	Spirochaetia	Sphaerochaetales	Sphaerochaetaceae	UBA6084	UBA6084 sp002428625	394	Yes
asm_GCA_002428635_1.LargeContigs	96.9	0.48	2267329	51	63374	39.8	No	0	1	2	High-Quality	MAG	Bacteria	Bacteroidota	Bacteroidia	Bacteroidales	UBA932	Bact-08	Bact-08 sp002428635	780	Yes
asm_GCA_002428665_1.LargeContigs	99.32	4.05	6891410	110	116879	37.1	Yes	1	1	0	High-Quality	MAG	Bacteria	Verrucomicrobiota	Verrucomicrobiae	Pedosphaerales	UBA8199	UBA6082	UBA6082 sp002428665	434	Yes
asm_GCA_002428685_1.LargeContigs	95.6	1.1	2714667	130	27377	37.1	Yes	1	1	0	High-Quality	MAG	Bacteria	Cloacimonadota	Cloacimonadia	Cloacimonadales	Cloacimonadaceae	Cloacimonas	Cloacimonas sp002428685	1265	Yes
asm_GCA_002428705_1.LargeContigs	100	0	4541696	72	117076	36.4	No	0	0	0	High-Quality	MAG	Bacteria	Desulfobacterota	Desulfovibrionia	Desulfovibrionales	Desulfovibrionaceae	UBA6079	UBA6079 sp002428705	1550	Yes
asm_GCA_002428725_1.LargeContigs	97.7	0	2584050	38	122730	38	No	0	0	0	High-Quality	MAG	Bacteria	Spirochaetota	Spirochaetia	Treponematales	Rectinemataceae	UBA2256	UBA2256 sp002428725	142	Yes
asm_GCA_002428735_1.LargeContigs	96.13	3.55	2999506	82	65290	40.4	No	0	0	0	High-Quality	MAG	Bacteria	Desulfobacterota	Syntrophia	Syntrophales	UBA2210	UBA6078	UBA6078 sp002428735	1810	Yes
asm_GCA_002428765_1.LargeContigs	84.52	1.42	2296984	62	62356	39.7	No	0	0	1	Medium-Quality	MAG	Bacteria	Bacillota_B	Desulfitobacteriia	Desulfitobacteriales	Desulfitobacteriaceae	Desulfosporosinus	Desulfosporosinus sp000770645	1006	No
asm_GCA_002428785_1.LargeContigs	74.44	1.9	2720511	69	90241	38.5	Yes	2	1	0	Medium-Quality	MAG	Bacteria	Bacteroidota	Bacteroidia	Bacteroidales	VadinHA17	SR-FBR-E99	SR-FBR-E99 sp002403305	95	No
asm_GCA_002435665_1.LargeContigs	87.59	0	2745741	26	154900	35.3	No	0	0	0	Medium-Quality	MAG	Bacteria	Pseudomonadota	Gammaproteobacteria	Pseudomonadales	Moraxellaceae	Acinetobacter	Acinetobacter radioresistens	464	No
asm_GCA_002435705_1.LargeContigs	64.34	0.89	2649304	130	44833	37.6	No	0	0	1	Medium-Quality	MAG	Bacteria	Bdellovibrionota	Bacteriovoracia	Bacteriovoracales	Bacteriovoracaceae	UBA6144	UBA6144 sp002435705	121	Yes
asm_GCA_002435745_1.LargeContigs	58.43	1.12	2558481	62	54341	36.9	Yes	1	2	0	Medium-Quality	MAG	Bacteria	UBP15	UBA6099	UBA6099	UBA6099	UBA6099	UBA6099 sp002435745	781	Yes
asm_GCA_002435785_1.LargeContigs	96.72	0.51	5735707	100	91931	37.9	Yes	1	0	1	High-Quality	MAG	Bacteria	Bacteroidota	Bacteroidia	Chitinophagales	Saprospiraceae	UBA6168	UBA6168 sp002435785	774	Yes
asm_GCA_002435795_1.LargeContigs	85.27	3.57	3728644	95	147191	37.8	No	0	0	0	Medium-Quality	MAG	Bacteria	Bdellovibrionota	Bacteriovoracia	Bacteriovoracales	Bacteriovoracaceae	UBA6166	UBA6166 sp002435795	126	Yes
asm_GCA_002435825_1.LargeContigs	84.55	1.09	2011597	76	42722	36.5	No	0	1	1	Medium-Quality	MAG	Bacteria	Chloroflexota	Anaerolineae	Anaerolineales	Anaerolineaceae	T78	T78 sp002435825	674	Yes
asm_GCA_002435835_1.LargeContigs	95.31	6.18	4565936	380	19020	40.9	No	0	0	1	Medium-Quality	MAG	Bacteria	Bacillota_A	Clostridia	Tissierellales	Sedimentibacteraceae	Sedimentibacter	Sedimentibacter sp002435835	2359	Yes
asm_GCA_002435865_1.LargeContigs	82.35	1.1	2138939	14	201698	37.1	No	0	0	0	Medium-Quality	MAG	Bacteria	Cloacimonadota	Cloacimonadia	Cloacimonadales	Cloacimonadaceae	UBA5614	UBA5614 sp002435865	966	Yes
asm_GCA_002435875_1.LargeContigs	83.85	2.48	2894636	286	13006	36.1	No	0	0	0	Medium-Quality	MAG	Bacteria	Chloroflexota	Anaerolineae	UBA2200	UBA2200	UBA6131	UBA6131 sp002435875	400	Yes
asm_GCA_002435905_1.LargeContigs	88.05	2.5	2537142	26	165766	38.8	No	0	0	1	Medium-Quality	MAG	Bacteria	Bacillota_B	Peptococcia	DRI-13	UBA5745	UBA5745	UBA5745 sp002435905	2338	Yes
asm_GCA_002435915_1.LargeContigs	98.39	0.83	1912466	5	522489	37.5	No	0	0	0	High-Quality	MAG	Bacteria	Bacillota_A	Clostridia	Christensenellales	UBA6094	UBA6094	UBA6094 sp002435915	115	Yes
asm_GCA_002435945_1.LargeContigs	86.91	0	2866329	91	44037	41.2	No	0	0	0	Medium-Quality	MAG	Bacteria	Thermotogota	Thermotogae	Petrotogales	Kosmotogaceae	Mesotoga	Mesotoga sp003228205	724	Yes
asm_GCA_002435955_1.LargeContigs	98.71	1.94	3387570	44	167607	39	No	0	0	1	High-Quality	MAG	Bacteria	Desulfobacterota_F	Desulfuromonadia	Desulfuromonadales	Syntrophotaleaceae	Syntrophotalea	Syntrophotalea sp002435955	1327	Yes
asm_GCA_002435985_1.LargeContigs	80.57	1.15	1723291	119	28052	36.8	Yes	1	0	0	Medium-Quality	MAG	Bacteria	Spirochaetota	Spirochaetia	Treponematales	Rectinemataceae	Rectinema	Rectinema sp002435985	135	Yes
asm_GCA_002436005_1.LargeContigs	66.21	1.82	1834552	105	34179	37	No	0	0	1	Medium-Quality	MAG	Bacteria	Chloroflexota	Anaerolineae	Anaerolineales	Anaerolineaceae	Brevefilum	Brevefilum sp002436005	816	Yes
asm_GCA_002436015_1.LargeContigs	62.71	0	1327641	16	112298	42	No	0	0	1	Medium-Quality	MAG	Bacteria	Synergistota	Synergistia	Synergistales	79-D21	79-D21	79-D21 sp002436015	648	Yes
asm_GCA_002436025_1.LargeContigs	91.76	1.1	2824933	18	259014	42.5	Yes	1	1	0	High-Quality	MAG	Bacteria	Fermentibacterota	Fermentibacteria	Fermentibacterales	Fermentibacteraceae	UBA6080	UBA6080 sp002436025	1893	Yes
asm_GCA_002436065_1.LargeContigs	98.68	2.18	5908186	119	92900	38	No	0	1	1	High-Quality	MAG	Bacteria	Chloroflexota	UBA6077	UBA6077	UBA6077	UBA6077	UBA6077 sp002436065	598	Yes
asm_GCA_002436085_1.LargeContigs	92.27	2.91	2156678	35	71776	35.4	Yes	1	1	1	High-Quality	MAG	Bacteria	Chloroflexota	Anaerolineae	Anaerolineales	Anaerolineaceae	49-20	49-20 sp002436085	1088	Yes
asm_GCA_002436105_1.LargeContigs	90.14	0.85	3116808	20	333395	38.6	Yes	1	1	1	High-Quality	MAG	Bacteria	Acidobacteriota	Aminicenantia	UBA2199	UBA2199	UBA2199	UBA2199 sp002436105	886	Yes
asm_GCA_002438375_1.LargeContigs	100	0.05	3055537	17	319112	35.3	No	0	0	0	High-Quality	MAG	Bacteria	Pseudomonadota	Gammaproteobacteria	Pseudomonadales	Moraxellaceae	Acinetobacter	Acinetobacter radioresistens	464	No
asm_GCA_002439355_1.LargeContigs	99.04	0.3	2985838	33	141347	35.2	No	0	0	0	High-Quality	MAG	Bacteria	Pseudomonadota	Gammaproteobacteria	Pseudomonadales	Moraxellaceae	Acinetobacter	Acinetobacter radioresistens	464	No
asm_GCA_002448235_1.LargeContigs	92.26	1.29	3765630	18	292145	40.5	No	0	0	0	High-Quality	MAG	Bacteria	Desulfobacterota	Desulfomonilia	UBA1062	UBA1062	UBA1062	UBA1062 sp002448235	833	Yes
asm_GCA_002454705_1.LargeContigs	94.87	1	3099693	156	31964	35.4	No	0	0	1	High-Quality	MAG	Bacteria	Pseudomonadota	Gammaproteobacteria	Pseudomonadales	Moraxellaceae	Acinetobacter	Acinetobacter radioresistens	464	No
asm_GCA_002470045_1.LargeContigs	92.06	2.37	2839190	93	50993	35.2	No	0	0	1	High-Quality	MAG	Bacteria	Pseudomonadota	Gammaproteobacteria	Pseudomonadales	Moraxellaceae	Acinetobacter	Acinetobacter radioresistens	464	No
asm_GCA_002476865_1.LargeContigs	88.37	0	573144	41	21406	40.3	Yes	1	2	1	Medium-Quality	MAG	Bacteria	Patescibacteria	CPR2	UBA1875	UBA1875	UBA7522	UBA7522 sp002476865	61	Yes
asm_GCA_002476915_1.LargeContigs	78.9	0	2481117	38	115605	35.3	No	0	0	0	Medium-Quality	MAG	Bacteria	Pseudomonadota	Gammaproteobacteria	Pseudomonadales	Moraxellaceae	Acinetobacter	Acinetobacter radioresistens	464	No
asm_GCA_002477355_1.LargeContigs	97.96	0	2963684	60	111824	35.4	No	0	0	1	High-Quality	MAG	Bacteria	Pseudomonadota	Gammaproteobacteria	Pseudomonadales	Moraxellaceae	Acinetobacter	Acinetobacter radioresistens	464	No
asm_GCA_002478225_1.LargeContigs	82.9	2.58	2668572	87	59816	41.5	No	0	0	0	Medium-Quality	MAG	Bacteria	Desulfobacterota_G	Syntrophorhabdia	Syntrophorhabdales	Syntrophorhabdaceae	UBA5609	UBA5609 sp002478225	1820	Yes
asm_GCA_002478245_1.LargeContigs	75.69	1.1	1159566	90	15676	42.9	No	0	0	0	Medium-Quality	MAG	Bacteria	UBP18	UBA7526	UBA7526	UBA7526	UBA7526	UBA7526 sp002478245	161	Yes
asm_GCA_002478265_1.LargeContigs	87.1	0.86	2344424	40	92948	38	Yes	1	0	0	Medium-Quality	MAG	Bacteria	Desulfobacterota	Syntrophia	Syntrophales	Smithellaceae	UBA4810	UBA4810 sp002478265	1828	Yes
asm_GCA_002478275_1.LargeContigs	80	2.36	1814544	60	65011	35.9	Yes	1	0	0	Medium-Quality	MAG	Bacteria	Actinomycetota	Coriobacteriia	OPB41	UBA912	UBA7524	UBA7524 sp002478275	1448	Yes
asm_GCA_002479405_1.LargeContigs	80.44	3.29	2286350	126	27638	35.8	No	0	0	1	Medium-Quality	MAG	Bacteria	Pseudomonadota	Gammaproteobacteria	Burkholderiales	Methylophilaceae	UBA6140	UBA6140 sp002479405	1308	Yes
asm_GCA_002479415_1.LargeContigs	93.64	0.85	2098518	59	52218	39	No	0	0	1	High-Quality	MAG	Bacteria	Bacillota_D	Dethiobacteria	Dethiobacterales	Dethiobacteraceae	UBA7523	UBA7523 sp002479415	500	Yes
asm_GCA_002479455_1.LargeContigs	86.44	0	1790708	68	34536	38.2	Yes	2	1	1	Medium-Quality	MAG	Bacteria	Bipolaricaulota	Bipolaricaulia	Bipolaricaulales	Bipolaricaulaceae	Bipolaricaulis	Bipolaricaulis sp002479455	900	Yes
asm_GCA_002482195_1.LargeContigs	97.85	1.23	2984004	140	33214	35.2	No	0	0	1	High-Quality	MAG	Bacteria	Pseudomonadota	Gammaproteobacteria	Pseudomonadales	Moraxellaceae	Acinetobacter	Acinetobacter radioresistens	464	No
asm_GCA_002494745_1.LargeContigs	96.95	0	1334648	14	231967	42.2	Yes	1	0	0	High-Quality	MAG	Archaea	Halobacteriota	Methanosarcinia_A	Methanosarcinales_A	Methermicoccaceae	Methermicoccus	Methermicoccus shengliensis	2014	No
asm_GCA_002494765_1.LargeContigs	92.53	3.2	1615647	115	23463	46	Yes	1	0	1	High-Quality	MAG	Archaea	Thermoplasmatota	UBA186	UBA186	UBA186	UBA186	UBA186 sp002494765	335	Yes
asm_GCA_002494785_1.LargeContigs	100	0	2183030	11	382348	41.9	Yes	1	1	1	High-Quality	MAG	Archaea	Methanobacteriota	Methanobacteria	Methanobacteriales	Methanobacteriaceae	UBA117	UBA117 sp002494785	2099	Yes
asm_GCA_002494795_1.LargeContigs	96.27	0.48	1465272	48	45510	45	No	0	2	1	High-Quality	MAG	Archaea	Methanobacteriota	Methanococci	Methanococcales	Methanococcaceae	Methanothermococcus	Methanothermococcus thermolithotrophicus	2092	No
asm_GCA_002495065_1.LargeContigs	86.56	0.65	2424220	78	48293	39.2	No	0	0	0	Medium-Quality	MAG	Archaea	Halobacteriota	Methanomicrobia	Methanomicrobiales	Methanoregulaceae	Methanoregula	Methanoregula sp002495065	336	Yes
asm_GCA_002496255_1.LargeContigs	88.43	0	2265952	267	10824	38.5	No	0	0	1	Medium-Quality	MAG	Archaea	Halobacteriota	Methanomicrobia	Methanomicrobiales	Methanoculleaceae	Methanoculleus	Methanoculleus marisnigri_B	345	No
asm_GCA_002497075_1.LargeContigs	98.39	0.97	1831976	36	132423	41.6	Yes	1	1	1	High-Quality	MAG	Archaea	Thermoplasmatota	Thermoplasmata	Methanomassiliicoccales	UBA472	UBA472	UBA472 sp002497075	1306	Yes
asm_GCA_002501695_1.LargeContigs	96.57	0.33	2306526	163	21888	40.5	No	0	0	1	High-Quality	MAG	Archaea	Halobacteriota	Methanosarcinia	Methanosarcinales	Methanosarcinaceae	Methanolobus	Methanolobus sp002501695	2038	Yes
asm_GCA_002503525_1.LargeContigs	85.49	3.27	2374334	278	10827	38.4	No	0	0	1	Medium-Quality	MAG	Archaea	Halobacteriota	Methanomicrobia	Methanomicrobiales	Methanoculleaceae	Methanoculleus	Methanoculleus marisnigri_B	345	No
asm_GCA_002503825_1.LargeContigs	99.67	1.31	2838694	17	193266	41	Yes	1	1	1	High-Quality	MAG	Archaea	Halobacteriota	Methanomicrobia	Methanomicrobiales	Methanoregulaceae	UBA467	UBA467 sp002503825	919	Yes
asm_GCA_002503885_1.LargeContigs	95.62	0.65	2582043	152	24926	38.3	No	0	0	1	High-Quality	MAG	Archaea	Halobacteriota	Methanomicrobia	Methanomicrobiales	Methanoculleaceae	Methanoculleus	Methanoculleus marisnigri_B	345	No
asm_GCA_002504725_1.LargeContigs	86.4	1.6	2007729	12	257087	41.1	No	0	0	1	Medium-Quality	MAG	Archaea	Methanobacteriota	Methanobacteria	Methanobacteriales	Methanobacteriaceae	UBA587	UBA587 sp002504725	226	Yes
asm_GCA_002505945_1.LargeContigs	69.25	0.93	1041545	86	15776	43.3	Yes	1	0	1	Medium-Quality	MAG	Archaea	Nanoarchaeota	Nanoarchaeia	Woesearchaeales	UBA119	UBA119	UBA119 sp002505945	17	Yes
asm_GCA_002508425_1.LargeContigs	95.26	2.94	2465993	182	20100	39.5	No	0	0	0	High-Quality	MAG	Archaea	Halobacteriota	Methanosarcinia	Methanosarcinales	Methanosarcinaceae	Methanomethylovorans	Methanomethylovorans sp002508425	2040	Yes
asm_GCA_002508635_1.LargeContigs	79.61	0.65	1971157	201	14272	40.2	No	0	0	0	Medium-Quality	MAG	Archaea	Halobacteriota	Methanosarcinia	Methanosarcinales	Methanosarcinaceae	Methanolobus	Methanolobus sp002508635	2026	Yes
asm_GCA_002509085_1.LargeContigs	80.55	0	1630131	171	14005	42.8	No	0	0	0	Medium-Quality	MAG	Archaea	Methanobacteriota	Methanobacteria	Methanobacteriales	Methanobacteriaceae	UBA588	UBA588 sp002509085	227	Yes
asm_GCA_002509245_1.LargeContigs	86.6	4.67	1574458	124	19508	39.5	Yes	1	0	1	Medium-Quality	MAG	Archaea	Thermoproteota	Bathyarchaeia	B26-1	BA1	BA2	BA2 sp001399795	1948	Yes
asm_GCA_002509345_1.LargeContigs	73.35	1.96	2253551	57	79282	39.1	No	0	0	0	Medium-Quality	MAG	Archaea	Halobacteriota	Methanomicrobia	Methanomicrobiales	Methanoregulaceae	Methanoregula	Methanoregula sp002495055	337	Yes
asm_GCA_002509495_1.LargeContigs	92.32	0	2197766	131	21319	41.5	No	0	0	1	High-Quality	MAG	Archaea	Halobacteriota	Methanomicrobia	Methanomicrobiales	Methanoregulaceae	Methanolinea_A	Methanolinea_A sp002509495	339	Yes
asm_GCA_002631855_1.LargeContigs	98.48	1.9	3332541	22	406995	36.4	No	0	0	1	High-Quality	MAG	Bacteria	Bacteroidota	Bacteroidia	Flavobacteriales	Flavobacteriaceae	Marixanthomonas	Marixanthomonas sp002631855	2315	Yes
asm_GCA_002631945_1.LargeContigs	53.26	1.95	1881782	313	8958	34.5	No	0	0	0	Medium-Quality	MAG	Bacteria	Pseudomonadota	Gammaproteobacteria	Enterobacterales_A	Alteromonadaceae	Cognaticolwellia	Cognaticolwellia polaris	489	Yes
asm_GCA_002631975_1.LargeContigs	67.9	5.17	3439775	579	8472	37.2	No	0	0	0	Medium-Quality	MAG	Bacteria	Pseudomonadota	Gammaproteobacteria	Pseudomonadales	Oleiphilaceae	Marinobacter	Marinobacter salarius	1342	No
asm_GCA_002632005_1.LargeContigs	56.45	6.71	3300412	958	3895	34.7	No	0	0	0	Medium-Quality	MAG	Bacteria	Pseudomonadota	Gammaproteobacteria	Enterobacterales_A	Alteromonadaceae	Colwellia	Colwellia sp913058405	485	Yes
asm_GCA_002632025_1.LargeContigs	66.02	3.55	1414307	695	2128	36.5	Yes	1	2	1	Medium-Quality	MAG	Bacteria	Pseudomonadota	Gammaproteobacteria	Methylococcales	Cycloclasticaceae	Cycloclasticus	Cycloclasticus pugetii	525	No
asm_GCA_002632055_1.LargeContigs	69.4	2.7	2090195	947	2398	36.7	No	0	0	1	Medium-Quality	MAG	Bacteria	Pseudomonadota	Gammaproteobacteria	Pseudomonadales	Alcanivoracaceae	Alcanivorax	Alcanivorax borkumensis	1397	No
asm_GCA_002632075_1.LargeContigs	97.8	5.98	4105535	325	19199	34.2	No	0	0	1	Medium-Quality	MAG	Bacteria	Pseudomonadota	Gammaproteobacteria	Enterobacterales_A	Alteromonadaceae	Pseudoalteromonas	Pseudoalteromonas marina	499	Yes
asm_GCA_002632135_1.LargeContigs	52.46	1.08	1461782	187	13176	35.5	No	0	0	1	Medium-Quality	MAG	Bacteria	Pseudomonadota	Gammaproteobacteria	Pseudomonadales	DSM-6294	Oleispira	Oleispira sp913061415	419	Yes
asm_GCA_002632185_1.LargeContigs	82.35	6.13	2348000	26	138005	34.8	No	0	0	0	Medium-Quality	MAG	Bacteria	Pseudomonadota	Gammaproteobacteria	Pseudomonadales	DSM-6294	Oleispira	Oleispira sp002632185	420	Yes
asm_GCA_002632235_1.LargeContigs	95.62	8.98	5532700	1037	7114	35.2	Yes	1	0	1	Medium-Quality	MAG	Bacteria	Pseudomonadota	Gammaproteobacteria	Enterobacterales_A	Alteromonadaceae	Paraglaciecola	Paraglaciecola chathamensis	10	Yes
asm_GCA_003641345_1.LargeContigs	84	3.3	2434882	445	6360	39.7	Yes	1	0	0	Medium-Quality	MAG	Bacteria	Zixibacteria	MSB-5A5	GN15	FEB-12	QNAD01	QNAD01 sp003641345	2477	Yes
asm_GCA_003641355_1.LargeContigs	66.79	0.1	1591186	349	4686	42.3	Yes	1	0	0	Medium-Quality	MAG	Bacteria	Zixibacteria	MSB-5A5	UBA10806	4484-95	4484-95	4484-95 sp002085375	2177	Yes
asm_GCA_003641365_1.LargeContigs	79.08	6.69	2280103	463	5208	40.4	No	0	0	1	Medium-Quality	MAG	Bacteria	Zixibacteria	MSB-5A5	GN15	PGXB01	JAAERC01	Genus_JAAERC01	1989	Yes
asm_GCA_003641405_1.LargeContigs	69.07	0.65	2749972	384	8763	39.1	No	0	0	1	Medium-Quality	MAG	Bacteria	Zixibacteria	MSB-5A5	GN15	FEB-12	B22-G1	B22-G1 sp003641405	981	Yes
asm_GCA_003641415_1.LargeContigs	93.59	3.46	2784515	359	10363	39.3	No	0	0	1	High-Quality	MAG	Bacteria	Zixibacteria	MSB-5A5	GN15	FEB-12	B120-G9	B120-G9 sp003641415	2478	Yes
asm_GCA_003641425_1.LargeContigs	93.1	2.5	2917037	465	7544	40.3	Yes	1	2	1	High-Quality	MAG	Bacteria	Zixibacteria	MSB-5A5	GN15	PGXB01	PGXB01	PGXB01 sp003641425	243	Yes
asm_GCA_003641465_1.LargeContigs	56.55	0.74	1147764	130	9428	39.1	No	0	0	1	Medium-Quality	MAG	Bacteria	Verrucomicrobiota	Kiritimatiellia	B70-G9	B70-G9	B70-G9	B70-G9 sp003641465	907	Yes
asm_GCA_003641485_1.LargeContigs	68.01	8.62	4392520	982	4560	39.6	No	0	0	1	Medium-Quality	MAG	Bacteria	Verrucomicrobiota	Kiritimatiellia	Kiritimatiellales	Pontiellaceae	Pontiella	Genus_Pontiella	1240	Yes
asm_GCA_003641495_1.LargeContigs	61.68	0.94	1084261	264	4083	39.5	Yes	1	1	1	Medium-Quality	MAG	Bacteria	Thermotogota	Thermotogae	Thermotogales	DSM-5069	B6-G13	B6-G13 sp003641785	711	No
asm_GCA_003641505_1.LargeContigs	63.13	6.19	1008904	266	3770	40	No	0	0	1	Medium-Quality	MAG	Bacteria	Thermotogota	Thermotogae	Thermotogales	DSM-5069	B6-G13	Genus_B6-G13	711	No
asm_GCA_003641545_1.LargeContigs	69.03	2	1478472	263	6383	45.9	No	0	0	1	Medium-Quality	MAG	Bacteria	Thermotogota	Thermotogae	B21-G9	B21-G9	B21-G9	B21-G9 sp003641545	730	Yes
asm_GCA_003641555_1.LargeContigs	81.82	0	1800312	362	5107	41.2	No	0	0	0	Medium-Quality	MAG	Bacteria	Thermotogota	Thermotogae	B3-G13	B3-G13	B3-G13	B3-G13 sp003641555	15	Yes
asm_GCA_003641585_1.LargeContigs	85.09	1.75	1270887	214	6059	44.3	No	0	0	1	Medium-Quality	MAG	Bacteria	Thermotogota	Thermotogae	Thermotogales	Thermotogaceae	4484-232	4484-232 sp002084985	699	Yes
asm_GCA_003641595_1.LargeContigs	70.17	9.62	1812506	431	4095	42.4	No	0	0	0	Medium-Quality	MAG	Bacteria	Desulfobacterota	Thermodesulfobacteria	Thermodesulfobacteriales	Thermodesulfobacteriaceae	Thermodesulfobacterium	Genus_Thermodesulfobacterium	2412	No
asm_GCA_003641605_1.LargeContigs	69.18	0.36	1450384	343	4467	41.6	Yes	2	2	1	Medium-Quality	MAG	Bacteria	Desulfobacterota	Dissulfuribacteria	Dissulfuribacterales	UBA3076	UBA3076	UBA3076 sp003194485	235	Yes
asm_GCA_003641645_1.LargeContigs	71.53	1.46	1051726	184	6428	42.2	No	0	0	0	Medium-Quality	MAG	Bacteria	Desulfobacterota	Thermodesulfobacteria	Thermodesulfobacteriales	Thermodesulfobacteriaceae	Thermodesulfobacterium	Thermodesulfobacterium sp003641645	2275	Yes
asm_GCA_003641665_1.LargeContigs	94.06	0	1752032	184	12789	41.7	Yes	1	1	1	High-Quality	MAG	Bacteria	WOR-3	32-111	QNBC01	QNBC01	QNBC01	QNBC01 sp003641665	2459	Yes
asm_GCA_003641675_1.LargeContigs	72.5	3.2	2587586	485	5810	40	No	0	0	0	Medium-Quality	MAG	Bacteria	Spirochaetota	Spirochaetia	SZUA-6	SZUA-6	SZUA-6	SZUA-6 sp003641675	2290	Yes
asm_GCA_003641695_1.LargeContigs	92.51	1.34	2578246	355	8827	40.2	No	0	0	0	High-Quality	MAG	Bacteria	Spirochaetota	Spirochaetia	B11-G9	B11-G9	B11-G9	B11-G9 sp003641695	102	Yes
asm_GCA_003641715_1.LargeContigs	84.19	2.83	3365392	532	7152	40.7	No	0	0	0	Medium-Quality	MAG	Bacteria	Spirochaetota	Spirochaetia	Spirochaetales_E	Spirochaetaceae_B	UBA2779	UBA2779 sp003644105	143	No
asm_GCA_003641745_1.LargeContigs	91.16	7	4314905	307	19470	40.1	Yes	1	2	0	Medium-Quality	MAG	Bacteria	Verrucomicrobiota	Verrucomicrobiae	Opitutales	Opitutaceae	B12-G4	B12-G4 sp003641745	925	Yes
asm_GCA_003641755_1.LargeContigs	75.34	0.53	1250558	276	4686	44.1	No	0	0	0	Medium-Quality	MAG	Bacteria	Thermotogota	Thermotogae	Thermotogales	Thermotogaceae	4484-232	4484-232 sp002084985	699	No
asm_GCA_003641785_1.LargeContigs	67.85	1.88	1346632	275	5196	39.8	No	0	0	1	Medium-Quality	MAG	Bacteria	Thermotogota	Thermotogae	Thermotogales	DSM-5069	B6-G13	B6-G13 sp003641785	711	Yes
asm_GCA_003641795_1.LargeContigs	88.6	0.18	1955956	320	7514	40.2	No	0	0	1	Medium-Quality	MAG	Bacteria	Thermotogota	Thermotogae	UBA12178	UBA12178	UBA12178	UBA12178 sp003641795	2498	Yes
asm_GCA_003643825_1.LargeContigs	72.48	9.08	1925744	229	8430	34.8	No	0	0	1	Medium-Quality	MAG	Bacteria	Campylobacterota	Campylobacteria	Campylobacterales	Sulfurimonadaceae	4484-230	Genus_4484-230	1870	Yes
asm_GCA_003643835_1.LargeContigs	98.51	0.41	1434794	40	49597	37.5	No	0	0	1	High-Quality	MAG	Bacteria	Campylobacterota	Campylobacteria	Campylobacterales	Arcobacteraceae	B24-G6	B24-G6 sp003643835	1986	Yes
asm_GCA_003643855_1.LargeContigs	72.39	5.09	1268674	247	5537	44.9	No	0	0	0	Medium-Quality	MAG	Bacteria	Desulfobacterota_F	B13-G15	B13-G15	B13-G15	Family_B13-G15	Family_B13-G15	868	No
asm_GCA_003643875_1.LargeContigs	57.89	2.1	1580019	412	3760	39.7	No	0	0	1	Medium-Quality	MAG	Bacteria	Desulfobacterota	Syntrophobacteria	BM002	BM002	BM002	Genus_BM002	633	Yes
asm_GCA_003643895_1.LargeContigs	95.14	5.48	2465738	151	21812	38.4	No	0	0	0	Medium-Quality	MAG	Bacteria	Desulfobacterota	Desulfobaccia	Desulfobaccales	Desulfobaccaceae	Desulfobacca_B	Desulfobacca_B sp002049795	252	Yes
asm_GCA_003643925_1.LargeContigs	50.7	1.61	1348207	337	3922	42.6	No	0	1	0	Medium-Quality	MAG	Bacteria	Desulfobacterota_F	WTBG01	JAGOGO01	JAGOGO01	Family_JAGOGO01	Family_JAGOGO01	2291	Yes
asm_GCA_003643935_1.LargeContigs	73.06	1.96	1668904	333	5511	42.6	No	0	0	0	Medium-Quality	MAG	Bacteria	Desulfobacterota	Desulfomonilia	UBA1062	UBA1062	B14-G9	B14-G9 sp003643935	2032	Yes
asm_GCA_003643965_1.LargeContigs	56.84	4.32	1614442	415	3791	43	No	0	0	0	Medium-Quality	MAG	Bacteria	Thermotogota	Thermotogae	Thermotogales	Thermotogaceae	4484-232	Genus_4484-232	699	No
asm_GCA_003643975_1.LargeContigs	89.18	1.72	1744083	254	7964	40.1	No	0	0	0	Medium-Quality	MAG	Bacteria	Thermotogota	Thermotogae	Petrotogales	Kosmotogaceae	Kosmotoga_B	Kosmotoga_B sp003643975	735	Yes
asm_GCA_003643985_1.LargeContigs	64.78	1.75	1382312	417	3288	43.6	Yes	1	0	0	Medium-Quality	MAG	Bacteria	Thermotogota	Thermotogae	Thermotogales	Thermotogaceae	4484-232	4484-232 sp002084985	699	No
asm_GCA_003644025_1.LargeContigs	56.08	2.52	1564869	381	4130	40.8	No	0	0	1	Medium-Quality	MAG	Bacteria	Desulfobacterota	Desulfofervidia	Desulfofervidales	Desulfofervidaceae	Desulfofervidus	Genus_Desulfofervidus	2224	Yes
asm_GCA_003644035_1.LargeContigs	79.57	7.75	1237082	242	4991	36.5	No	0	0	5	Medium-Quality	MAG	Bacteria	Bacillota	Bacilli	Mycoplasmatales	Hepatoplasmataceae	Family_Hepatoplasmataceae	Family_Hepatoplasmataceae	2488	Yes
asm_GCA_003644055_1.LargeContigs	54.58	5.79	1294326	327	3970	43.4	No	0	0	3	Medium-Quality	MAG	Bacteria	WOR-3	32-111	QNBC01	QNBC01	JAGLYS01	Genus_JAGLYS01	2460	Yes
asm_GCA_003644085_1.LargeContigs	65.4	6.93	3207648	766	4204	40.6	No	0	0	0	Medium-Quality	MAG	Bacteria	Spirochaetota	Spirochaetia	Spirochaetales_E	Spirochaetaceae_B	UBA2779	UBA2779 sp003644105	143	No
asm_GCA_003644095_1.LargeContigs	56.09	0.53	1700488	416	4128	40.4	Yes	1	1	4	Medium-Quality	MAG	Bacteria	Spirochaetota	Spirochaetia	Spirochaetales_E	Spirochaetaceae_B	UBA2779	UBA2779 sp003644105	143	No
asm_GCA_003644105_1.LargeContigs	88	1.6	3324968	475	8930	40.5	No	0	0	0	Medium-Quality	MAG	Bacteria	Spirochaetota	Spirochaetia	Spirochaetales_E	Spirochaetaceae_B	UBA2779	UBA2779 sp003644105	143	Yes
asm_GCA_003644145_1.LargeContigs	61.2	3.87	1883009	455	4188	44	No	0	0	1	Medium-Quality	MAG	Bacteria	Spirochaetota	B62-G9	B62-G9	Order_B62-G9	Order_B62-G9	Order_B62-G9	2209	Yes
asm_GCA_003644155_1.LargeContigs	55.09	6.35	2116514	483	4484	38.4	No	0	0	0	Medium-Quality	MAG	Bacteria	Planctomycetota	Phycisphaerae	Sedimentisphaerales	Anaerohalosphaeraceae	4572-13	Genus_4572-13	2506	No
asm_GCA_003644175_1.LargeContigs	82.73	1.24	2511084	405	7296	39.2	No	0	0	1	Medium-Quality	MAG	Bacteria	Planctomycetota	Phycisphaerae	Sedimentisphaerales	Anaerohalosphaeraceae	B28-G16	B28-G16 sp003644175	1132	Yes
asm_GCA_003644205_1.LargeContigs	77.84	1.7	2638112	424	6692	39.4	No	0	0	1	Medium-Quality	MAG	Bacteria	Planctomycetota	Phycisphaerae	Sedimentisphaerales	Anaerohalosphaeraceae	QNBT01	QNBT01 sp003644205	104	Yes
asm_GCA_003644215_1.LargeContigs	61.52	2.27	1378000	245	5900	37.4	No	0	0	2	Medium-Quality	MAG	Bacteria	Planctomycetota	Phycisphaerae	Sedimentisphaerales	Anaerohalosphaeraceae	4572-13	4572-13 sp003644215	2506	Yes
asm_GCA_003644235_1.LargeContigs	53.51	3.54	1563063	357	4529	38.8	No	0	0	1	Medium-Quality	MAG	Bacteria	Planctomycetota	E44-bin39	E44-bin39	Order_E44-bin39	Order_E44-bin39	Order_E44-bin39	1236	Yes
asm_GCA_003644265_1.LargeContigs	90.34	6.82	5106234	414	21545	37.3	Yes	1	1	2	Medium-Quality	MAG	Bacteria	Planctomycetota	B15-G4	B15-G4	B15-G4	B15-G4	B15-G4 sp003644265	1123	Yes
asm_GCA_003644275_1.LargeContigs	78.67	1.14	1672354	324	5345	37.8	No	0	0	0	Medium-Quality	MAG	Bacteria	Planctomycetota	B143-G9	B143-G9	B143-G9	B143-G9	B143-G9 sp003644275	893	Yes
asm_GCA_003644295_1.LargeContigs	77.1	3.89	1822434	348	5620	38.4	Yes	1	1	2	Medium-Quality	MAG	Bacteria	Planctomycetota	Phycisphaerae	Sedimentisphaerales	SG8-4	B140-G9	B140-G9 sp003644295	99	Yes
asm_GCA_003644325_1.LargeContigs	79.84	3.94	2279701	471	5031	39.2	No	0	0	3	Medium-Quality	MAG	Bacteria	Planctomycetota	B129-G9	B129-G9	B129-G9	B129-G9	B129-G9 sp003644325	540	Yes
asm_GCA_003644335_1.LargeContigs	65.08	1.62	2015865	415	5096	37.4	No	0	0	1	Medium-Quality	MAG	Bacteria	Planctomycetota	Phycisphaerae	SM23-33	SM23-33	B1-G9	B1-G9 sp003644335	831	Yes
asm_GCA_003644345_1.LargeContigs	59.48	0	1150484	115	15824	44.5	No	0	1	1	Medium-Quality	MAG	Bacteria	Omnitrophota	Koll11	Duberdicusellales	Duberdicusellaceae	Duberdicusella	Duberdicusella sinuisediminis	1078	No
asm_GCA_003644385_1.LargeContigs	87.07	4.23	1739671	175	14723	39.8	No	0	0	1	Medium-Quality	MAG	Bacteria	Omnitrophota	Koll11	GIF10	Profunditerraquicolaceae	B70-G16	B70-G16 sp003644385	1138	Yes
asm_GCA_003644395_1.LargeContigs	81.36	2.54	1153354	117	10919	50	Yes	1	0	3	Medium-Quality	MAG	Bacteria	Ratteibacteria	UBA8468	B48-G9	JAFGKM01	B48-G9	B48-G9 sp003644395	660	Yes
asm_GCA_003644405_1.LargeContigs	84.59	1.08	1428764	175	11976	43.8	Yes	1	0	2	Medium-Quality	MAG	Bacteria	Omnitrophota	Koll11	Duberdicusellales	4484-171	B7-G16	B7-G16 sp003644405	1079	Yes
asm_GCA_003644445_1.LargeContigs	81.18	1.25	1201878	117	15611	44.8	Yes	1	1	1	Medium-Quality	MAG	Bacteria	Omnitrophota	Koll11	Duberdicusellales	Duberdicusellaceae	Duberdicusella	Duberdicusella sinuisediminis	1078	No
asm_GCA_003644455_1.LargeContigs	65.93	6.01	1044400	223	4879	44.8	Yes	1	0	2	Medium-Quality	MAG	Bacteria	Omnitrophota	Koll11	4484-49	4484-49	4484-49	4484-49 sp002085265	1129	No
asm_GCA_003644465_1.LargeContigs	54.84	0.1	1031482	237	4385	43.4	No	0	0	1	Medium-Quality	MAG	Bacteria	Omnitrophota	Koll11	Duberdicusellales	4484-171	B7-G16	Genus_B7-G16	1076	Yes
asm_GCA_003644505_1.LargeContigs	93.55	1.2	2118535	170	25046	40.8	Yes	1	1	3	High-Quality	MAG	Bacteria	Omnitrophota	Koll11	SKK-01	SKK-01	Makaraimicrobium	Makaraimicrobium thalassicum	683	Yes
asm_GCA_003644515_1.LargeContigs	88.08	9.01	1884849	328	7156	43.2	Yes	2	1	8	Medium-Quality	MAG	Bacteria	Omnitrophota	Koll11	Duberdicusellales	4484-171	B7-G16	B7-G16 sp003644405	1079	No
asm_GCA_003644525_1.LargeContigs	87.1	1.08	1426134	113	19846	44.7	Yes	2	1	7	Medium-Quality	MAG	Bacteria	Omnitrophota	Koll11	Duberdicusellales	Duberdicusellaceae	Duberdicusella	Duberdicusella sinuisediminis	1078	Yes
asm_GCA_003644565_1.LargeContigs	72.78	0.06	1886268	357	5924	44.9	No	0	0	2	Medium-Quality	MAG	Bacteria	Marinisomatota	UBA2242	UBA2242	B5-G15	B5-G15	B5-G15 sp003645825	2285	No
asm_GCA_003644575_1.LargeContigs	78.02	0.1	1834769	316	6613	39.5	No	0	0	0	Medium-Quality	MAG	Bacteria	Marinisomatota	AB16	AB16	46-47	46-47	46-47 sp003644575	2449	Yes
asm_GCA_003644595_1.LargeContigs	70.88	1.1	1723498	367	4853	45.1	No	0	0	0	Medium-Quality	MAG	Bacteria	Marinisomatota	UBA2242	UBA2242	B5-G15	B5-G15	B5-G15 sp003645825	2285	No
asm_GCA_003644625_1.LargeContigs	59.57	2.2	1837022	421	4477	38.7	Yes	1	0	0	Medium-Quality	MAG	Bacteria	Marinisomatota	AB16	AB16	46-47	M50B103	Genus_M50B103	1858	Yes
asm_GCA_003644635_1.LargeContigs	52.87	5.49	1263215	334	3672	44.5	No	0	0	2	Medium-Quality	MAG	Bacteria	Latescibacterota	4484-107	B68-G9	B68-G9	B68-G9	Genus_B68-G9	249	Yes
asm_GCA_003644665_1.LargeContigs	50.85	1.2	1321373	340	3739	46.2	No	0	0	0	Medium-Quality	MAG	Bacteria	Latescibacterota	4484-107	B68-G9	B68-G9	B68-G9	Genus_B68-G9	248	No
asm_GCA_003644685_1.LargeContigs	80.09	1.16	1980049	315	7210	46	Yes	1	0	1	Medium-Quality	MAG	Bacteria	Latescibacterota	4484-107	B68-G9	B68-G9	B68-G9	B68-G9 sp003645885	248	No
asm_GCA_003644695_1.LargeContigs	60.33	1.1	1726257	425	4057	40.8	No	0	0	1	Medium-Quality	MAG	Bacteria	Latescibacterota	4484-107	4484-107	4484-107	4484-107	4484-107 sp002059205	154	No
asm_GCA_003644715_1.LargeContigs	92.24	8.24	2582695	345	10591	41.8	Yes	2	2	1	Medium-Quality	MAG	Bacteria	Latescibacterota	MVCY01	MVCY01	MVCY01	MVCY01	MVCY01 sp002049985	325	No
asm_GCA_003644735_1.LargeContigs	76.56	2.2	1913880	287	7490	46.4	Yes	1	1	1	Medium-Quality	MAG	Bacteria	Latescibacterota	4484-107	B68-G9	B68-G9	B68-G9	B68-G9 sp003645885	248	No
asm_GCA_003644765_1.LargeContigs	85.43	3.3	2648335	496	6025	40	No	0	0	0	Medium-Quality	MAG	Bacteria	JdFR-76	JdFR-76	JdFR-76	4484-219	4484-219	4484-219 sp002085035	331	No
asm_GCA_003644775_1.LargeContigs	93.96	5.04	2780181	434	7895	39.9	Yes	1	1	1	Medium-Quality	MAG	Bacteria	JdFR-76	JdFR-76	JdFR-76	4484-219	4484-219	4484-219 sp002085035	331	No
asm_GCA_003644785_1.LargeContigs	76.12	1.2	2265296	453	5265	39.7	No	0	0	0	Medium-Quality	MAG	Bacteria	JdFR-76	JdFR-76	JdFR-76	4484-219	4484-219	4484-219 sp002085035	331	No
asm_GCA_003644825_1.LargeContigs	78.94	1.1	2483551	493	5352	44.6	No	0	0	0	Medium-Quality	MAG	Bacteria	SM23-31	SM23-31	B21-G16	B21-G16	B21-G16	B21-G16 sp003644825	2253	Yes
asm_GCA_003644835_1.LargeContigs	57.06	1.12	1934540	457	4230	40	No	0	0	1	Medium-Quality	MAG	Bacteria	Bacteroidota	Ignavibacteria	Ignavibacteriales	Ignavibacteriaceae	Family_Ignavibacteriaceae	Family_Ignavibacteriaceae	2417	Yes
asm_GCA_003644845_1.LargeContigs	51.58	9.5	2675162	842	3110	39.9	Yes	1	0	0	Medium-Quality	MAG	Bacteria	Bacteroidota	Ignavibacteria	Ignavibacteriales	Ignavibacteriaceae	BMS3ABIN03	Genus_BMS3ABIN03	2418	Yes
asm_GCA_003644885_1.LargeContigs	62.02	0	1379302	314	4495	43.1	No	0	0	2	Medium-Quality	MAG	Bacteria	WOR-3	Hydrothermia	B15-G9	DRBW01	DRBW01	DRBW01 sp011042705	641	Yes
asm_GCA_003644895_1.LargeContigs	88.21	1.47	1678300	248	7885	42.7	No	0	1	1	Medium-Quality	MAG	Bacteria	WOR-3	Hydrothermia	UBA1063	UBA1063	B29-G16	B29-G16 sp003644895	2182	Yes
asm_GCA_003644925_1.LargeContigs	89.24	7.08	3618976	492	9565	41.4	Yes	1	0	1	Medium-Quality	MAG	Bacteria	Fermentibacterota	Fermentibacteria	Fermentibacterales	Fermentibacteraceae	Aegiribacteria	Aegiribacteria sp003644925	1895	Yes
asm_GCA_003644935_1.LargeContigs	54.32	2.2	1310862	304	4524	41.2	No	0	0	0	Medium-Quality	MAG	Bacteria	Krumholzibacteriota	Krumholzibacteria	Krumholzibacteriales	Krumholzibacteriaceae	4484-7	4484-7 sp002085285	1878	No
asm_GCA_003644945_1.LargeContigs	51.76	0.06	2588382	637	4085	38.1	No	0	0	0	Medium-Quality	MAG	Bacteria	Krumholzibacteriota	Krumholzibacteria	JAJRXK01	JAJRXK01	Family_JAJRXK01	Family_JAJRXK01	1238	Yes
asm_GCA_003644985_1.LargeContigs	80.95	6.59	3690359	375	15624	38.2	Yes	1	0	1	Medium-Quality	MAG	Bacteria	Krumholzibacteriota	Krumholzibacteria	JAJRXK01	JAJRXK01	Family_JAJRXK01	Family_JAJRXK01	1238	No
asm_GCA_003644995_1.LargeContigs	68.13	2.36	1548601	234	6860	46	No	0	0	1	Medium-Quality	MAG	Bacteria	WOR-3	UBA3072	UBA3072	B12-G15	B12-G15	B12-G15 sp003646055	640	No
asm_GCA_003645025_1.LargeContigs	62.09	2.2	1502224	312	4824	47.7	No	0	0	0	Medium-Quality	MAG	Bacteria	WOR-3	UBA3072	WFRC01	Order_WFRC01	Order_WFRC01	Order_WFRC01	631	Yes
asm_GCA_003645045_1.LargeContigs	68.18	3.85	1396316	297	4756	47.6	Yes	1	0	0	Medium-Quality	MAG	Bacteria	WOR-3	UBA3072	WFRC01	Order_WFRC01	Order_WFRC01	Order_WFRC01	631	No
asm_GCA_003645055_1.LargeContigs	51.64	1.1	1439718	367	3840	40.5	Yes	1	1	1	Medium-Quality	MAG	Bacteria	UBP14	UBA6098	UBA6098	B30-G16	JAGHAI01	JAGHAI01 sp021161555	66	Yes
asm_GCA_003645085_1.LargeContigs	91.21	2.2	2674773	268	13541	41	Yes	1	0	0	High-Quality	MAG	Bacteria	UBP14	UBA6098	UBA6098	UBA6098	QNEE01	QNEE01 sp003645085	1090	Yes
asm_GCA_003645105_1.LargeContigs	56.01	2.33	1497315	406	3596	40.8	No	0	0	1	Medium-Quality	MAG	Bacteria	UBP14	UBA6098	UBA6098	B30-G16	B30-G16	Genus_B30-G16	2259	Yes
asm_GCA_003645115_1.LargeContigs	65.38	2.2	2153964	401	5812	41	No	0	2	2	Medium-Quality	MAG	Bacteria	UBP14	UBA6098	UBA6098	B30-G16	B30-G16	B30-G16 sp003645115	306	Yes
asm_GCA_003645125_1.LargeContigs	53.24	1.2	898277	220	4204	41.8	No	0	0	2	Medium-Quality	MAG	Bacteria	UBP14	UBA6098	4484-93	4484-93	4484-93	4484-93 sp002085385	1173	No
asm_GCA_003645165_1.LargeContigs	57.53	1.76	1604796	350	4693	37.1	No	0	0	0	Medium-Quality	MAG	Bacteria	Pseudomonadota	Gammaproteobacteria	HK1	Order_HK1	Order_HK1	Order_HK1	1196	Yes
asm_GCA_003645175_1.LargeContigs	76.9	1.56	3540588	630	6505	35.7	No	0	0	0	Medium-Quality	MAG	Bacteria	Pseudomonadota	Gammaproteobacteria	Beggiatoales	Beggiatoaceae	QNES01	QNES01 sp003645255	313	No
asm_GCA_003645185_1.LargeContigs	85.62	1.45	8365060	853	13603	35.3	No	0	0	1	Medium-Quality	MAG	Bacteria	Pseudomonadota	Gammaproteobacteria	Beggiatoales	Beggiatoaceae	UBA10656	UBA10656 sp003645185	312	Yes
asm_GCA_003645215_1.LargeContigs	82.03	2.23	2449943	389	7530	37.5	No	0	0	1	Medium-Quality	MAG	Bacteria	Pseudomonadota	Gammaproteobacteria	UBA4486	UBA4486	SMWN01	SMWN01 sp003645215	481	Yes
asm_GCA_003645245_1.LargeContigs	87.6	3.34	8214596	977	11489	35.2	No	0	0	1	Medium-Quality	MAG	Bacteria	Pseudomonadota	Gammaproteobacteria	Beggiatoales	Beggiatoaceae	UBA10656	UBA10656 sp003645185	312	No
asm_GCA_003645255_1.LargeContigs	91.25	1.2	4409887	313	20471	36	No	0	0	0	High-Quality	MAG	Bacteria	Pseudomonadota	Gammaproteobacteria	Beggiatoales	Beggiatoaceae	QNES01	QNES01 sp003645255	313	Yes
asm_GCA_003645265_1.LargeContigs	73.72	2.69	2240585	399	6194	37.6	No	0	0	2	Medium-Quality	MAG	Bacteria	Pseudomonadota	Gammaproteobacteria	UBA4486	UBA4486	SMWN01	SMWN01 sp003645215	481	No
asm_GCA_003645305_1.LargeContigs	71.55	2.44	2089239	377	6583	36.1	No	0	0	1	Medium-Quality	MAG	Bacteria	Pseudomonadota	Gammaproteobacteria	Nitrosococcales	Methylophagaceae	GCA-002733105	GCA-002733105 sp003645385	441	No
asm_GCA_003645315_1.LargeContigs	86.23	1.82	8279480	1040	10059	35.2	No	0	0	1	Medium-Quality	MAG	Bacteria	Pseudomonadota	Gammaproteobacteria	Beggiatoales	Beggiatoaceae	UBA10656	UBA10656 sp003645185	312	No
asm_GCA_003645335_1.LargeContigs	62.12	3.5	2166669	552	3936	36.4	No	0	0	0	Medium-Quality	MAG	Bacteria	Pseudomonadota	Gammaproteobacteria	GRL18	GRL18	GRL18	Genus_GRL18	1402	Yes
asm_GCA_003645345_1.LargeContigs	66.65	3.58	2002472	375	6061	36.3	No	0	0	0	Medium-Quality	MAG	Bacteria	Pseudomonadota	Gammaproteobacteria	Nitrosococcales	Methylophagaceae	GCA-002733105	GCA-002733105 sp003645385	441	No
asm_GCA_003645385_1.LargeContigs	81.48	2.54	1910269	289	7243	36.2	No	0	0	0	Medium-Quality	MAG	Bacteria	Pseudomonadota	Gammaproteobacteria	Nitrosococcales	Methylophagaceae	GCA-002733105	GCA-002733105 sp003645385	441	Yes
asm_GCA_003645395_1.LargeContigs	77.14	1.12	2315348	405	6557	37.2	No	0	0	0	Medium-Quality	MAG	Bacteria	Pseudomonadota	Gammaproteobacteria	Immundisolibacterales	Immundisolibacteraceae	QNFC01	QNFC01 sp003645395	462	Yes
asm_GCA_003645405_1.LargeContigs	54.74	7.55	2085717	502	4215	37.2	No	0	0	1	Medium-Quality	MAG	Bacteria	Pseudomonadota	Gammaproteobacteria	Enterobacterales_A	GCA-2746155	Family_GCA-2746155	Family_GCA-2746155	1391	Yes
asm_GCA_003645435_1.LargeContigs	80.84	5.9	3229603	550	6720	38	No	0	1	1	Medium-Quality	MAG	Bacteria	Pseudomonadota	Gammaproteobacteria	GCA-001735895	GCA-001735895	GCA-001735895	GCA-001735895 sp003645435	803	Yes
asm_GCA_003645455_1.LargeContigs	93.65	0.61	2057831	83	33312	36.8	No	0	0	9	High-Quality	MAG	Bacteria	Pseudomonadota	Gammaproteobacteria	QNFE01	QNFE01	QNFE01	QNFE01 sp003645455	319	Yes
asm_GCA_003645485_1.LargeContigs	65.24	0.66	2070175	488	4351	37.1	Yes	1	1	2	Medium-Quality	MAG	Bacteria	Pseudomonadota	Gammaproteobacteria	Immundisolibacterales	Immundisolibacteraceae	QNFC01	QNFC01 sp003645395	462	No
asm_GCA_003645495_1.LargeContigs	67.33	2.74	2564567	483	5892	36	No	0	0	0	Medium-Quality	MAG	Bacteria	Pseudomonadota	Gammaproteobacteria	Woeseiales	Woeseiaceae	SZUA-117	SZUA-117 sp003645495	809	Yes
asm_GCA_003645525_1.LargeContigs	79.76	9.34	3978662	583	8703	36.3	No	0	0	8	Medium-Quality	MAG	Bacteria	Pseudomonadota	Gammaproteobacteria	Woeseiales	Woeseiaceae	SZUA-117	Genus_SZUA-117	809	No
asm_GCA_003645535_1.LargeContigs	89.27	1.66	4151404	578	10001	37.3	Yes	1	0	0	Medium-Quality	MAG	Bacteria	Pseudomonadota	Gammaproteobacteria	Pseudomonadales	Porticoccaceae	HB2-32-21	HB2-32-21 sp003645535	463	Yes
asm_GCA_003645555_1.LargeContigs	76.97	3.94	2213558	392	6421	36.5	Yes	1	0	14	Medium-Quality	MAG	Bacteria	Pseudomonadota	Gammaproteobacteria	QNFN01	QNFN01	QNFN01	QNFN01 sp003645555	1197	Yes
asm_GCA_003645585_1.LargeContigs	81.42	7.95	2466301	403	7521	35.7	Yes	1	0	2	Medium-Quality	MAG	Bacteria	Campylobacterota	Campylobacteria	Campylobacterales	Sulfurovaceae	Sulfurovum	Genus_Sulfurovum	2243	Yes
asm_GCA_003645605_1.LargeContigs	80.95	2.13	1911994	390	5261	41.1	No	0	0	2	Medium-Quality	MAG	Bacteria	Desulfobacterota	Dissulfuribacteria	Dissulfuribacterales	UBA3076	UBA3076	UBA3076 sp003645605	236	Yes
asm_GCA_003645615_1.LargeContigs	89.01	1.75	2229852	186	16974	45.2	No	0	2	0	Medium-Quality	MAG	Bacteria	WOR-3	WOR-3	SM23-42	B36-G15	B36-G15	B36-G15 sp003645615	642	Yes
asm_GCA_003645645_1.LargeContigs	96.55	0	3982661	380	14979	42	No	0	0	1	High-Quality	MAG	Bacteria	Spirochaetota	Spirochaetia	SPDA01	B32-G16	B32-G16	B32-G16 sp003645645	11	Yes
asm_GCA_003645655_1.LargeContigs	51.64	4.65	2492989	530	4882	39.9	No	0	0	0	Medium-Quality	MAG	Bacteria	Spirochaetota	Spirochaetia	B11-G9	B11-G9	JAJRQE01	Genus_JAJRQE01	2324	Yes
asm_GCA_003645685_1.LargeContigs	54.63	8.38	2163221	610	3521	42.9	No	0	0	0	Medium-Quality	MAG	Bacteria	Spirochaetota	B62-G9	B62-G9	B62-G9	B62-G9	Genus_B62-G9	2288	No
asm_GCA_003645695_1.LargeContigs	87.33	5.73	2723568	261	11888	43.2	Yes	1	0	2	Medium-Quality	MAG	Bacteria	Spirochaetota	B62-G9	B62-G9	B62-G9	B62-G9	B62-G9 sp003645695	2288	Yes
asm_GCA_003645725_1.LargeContigs	65.57	8.03	1968436	463	4282	39.4	No	0	0	0	Medium-Quality	MAG	Bacteria	Planctomycetota	E44-bin39	E44-bin39	Order_E44-bin39	Order_E44-bin39	Order_E44-bin39	1237	Yes
asm_GCA_003645735_1.LargeContigs	73.11	3.85	2639519	538	5203	44.6	No	0	0	0	Medium-Quality	MAG	Bacteria	Poribacteria	WGA-4E	B28-G17	B28-G17	B28-G17	B28-G17 sp003645735	259	Yes
asm_GCA_003645745_1.LargeContigs	82.26	1.17	1627781	244	7703	39.8	No	0	0	0	Medium-Quality	MAG	Bacteria	Omnitrophota	Koll11	B26-G9	B26-G9	B26-G9	B26-G9 sp003645745	373	Yes
asm_GCA_003645785_1.LargeContigs	51.02	3.18	970671	224	4309	43.3	Yes	1	0	0	Medium-Quality	MAG	Bacteria	Omnitrophota	Koll11	Duberdicusellales	4484-171	B7-G16	B7-G16 sp003644405	1079	No
asm_GCA_003645805_1.LargeContigs	90.26	1.61	869646	79	14669	44.8	No	0	0	0	High-Quality	MAG	Bacteria	Omnitrophota	4484-213	4484-213	4484-213	B17-G2	B17-G2 sp003645805	1873	Yes
asm_GCA_003645825_1.LargeContigs	82.42	0.1	2127645	350	6724	44.9	No	0	0	0	Medium-Quality	MAG	Bacteria	Marinisomatota	UBA2242	UBA2242	B5-G15	B5-G15	B5-G15 sp003645825	2285	Yes
asm_GCA_003645835_1.LargeContigs	65.38	1.1	2086902	507	4096	42.1	No	0	0	2	Medium-Quality	MAG	Bacteria	Marinisomatota	UBA2242	UBA2242	UBA2242	BS750m-G69	Genus_BS750m-G69	200	Yes
asm_GCA_003645845_1.LargeContigs	86.81	4.4	2811570	423	7942	39.8	Yes	1	0	0	Medium-Quality	MAG	Bacteria	Marinisomatota	UBA2242	UBA2242	UBA2242	B118-G9	B118-G9 sp003645845	201	Yes
asm_GCA_003645885_1.LargeContigs	88.78	1.1	1916702	175	11969	46.4	No	0	0	0	Medium-Quality	MAG	Bacteria	Latescibacterota	4484-107	B68-G9	B68-G9	B68-G9	B68-G9 sp003645885	248	Yes
asm_GCA_003645905_1.LargeContigs	92.79	7.39	2708036	461	7977	41.6	Yes	1	1	0	Medium-Quality	MAG	Bacteria	Latescibacterota	MVCY01	MVCY01	MVCY01	MVCY01	MVCY01 sp002049985	325	Yes
asm_GCA_003645915_1.LargeContigs	85.45	1.26	2456796	516	5038	41	No	0	0	0	Medium-Quality	MAG	Bacteria	QNDG01	QNDG01	QNDG01	QNDG01	QNDG01	QNDG01 sp003645915	83	Yes
asm_GCA_003645925_1.LargeContigs	91.21	9.62	3227641	598	6932	40.2	Yes	1	0	1	Medium-Quality	MAG	Bacteria	JdFR-76	JdFR-76	JdFR-76	4484-219	4484-219	4484-219 sp002085035	331	No
asm_GCA_003645965_1.LargeContigs	77.77	0.55	2420289	508	5049	40.3	No	0	0	0	Medium-Quality	MAG	Bacteria	JdFR-76	JdFR-76	JdFR-76	4484-219	4484-219	4484-219 sp002085035	331	Yes
asm_GCA_003645975_1.LargeContigs	75.32	1.2	1776496	323	6212	39.4	No	0	0	0	Medium-Quality	MAG	Bacteria	WOR-3	Hydrothermia	B15-G9	B15-G9	B15-G9	B15-G9 sp003645975	19	Yes
asm_GCA_003645985_1.LargeContigs	66.79	7.14	1504476	296	5051	43.5	Yes	1	1	1	Medium-Quality	MAG	Bacteria	WOR-3	Hydrothermia	B15-G9	DRBW01	DRBW01	DRBW01 sp011042705	641	No
asm_GCA_003646025_1.LargeContigs	88.46	2.38	2458314	136	23204	40.3	No	0	0	0	Medium-Quality	MAG	Bacteria	Fermentibacterota	Fermentibacteria	Fermentibacterales	Fermentibacteraceae	Sabulitectum	Sabulitectum sp003646025	812	Yes
asm_GCA_003646045_1.LargeContigs	91.14	2.81	3195663	591	5823	38.3	No	0	0	1	High-Quality	MAG	Bacteria	Krumholzibacteriota	Krumholzibacteria	LZORAL124-64-63	LZORAL124-64-63	JAAEQC01	JAAEQC01 sp003646045	754	Yes
asm_GCA_003646055_1.LargeContigs	79.81	1.75	1866734	277	8144	46.2	Yes	1	1	0	Medium-Quality	MAG	Bacteria	WOR-3	UBA3072	UBA3072	B12-G15	B12-G15	B12-G15 sp003646055	640	Yes
asm_GCA_003646065_1.LargeContigs	51.68	3.3	868674	272	3207	46.9	No	0	0	1	Medium-Quality	MAG	Bacteria	WOR-3	UBA3072	WFRC01	Order_WFRC01	Order_WFRC01	Order_WFRC01	631	No
asm_GCA_003646105_1.LargeContigs	54.8	1.16	1230614	296	4104	40.1	Yes	1	0	0	Medium-Quality	MAG	Bacteria	UBP14	UBA6098	UBA6098	B30-G16	JAGGRZ01	JAGGRZ01 sp021159335	2286	Yes
asm_GCA_003646115_1.LargeContigs	91.05	1.98	4418946	464	14535	35.8	No	0	0	1	High-Quality	MAG	Bacteria	Pseudomonadota	Gammaproteobacteria	Beggiatoales	Beggiatoaceae	QNES01	QNES01 sp003645255	313	No
asm_GCA_003646135_1.LargeContigs	92.46	2.97	9360232	888	14768	34.7	No	0	0	0	High-Quality	MAG	Bacteria	Pseudomonadota	Gammaproteobacteria	Beggiatoales	Beggiatoaceae	UBA10656	UBA10656 sp002085445	310	Yes
asm_GCA_003646155_1.LargeContigs	60.59	8.78	3633001	791	4456	36.2	No	0	0	0	Medium-Quality	MAG	Bacteria	Pseudomonadota	Gammaproteobacteria	SZUA-229	SZUA-229	GCA-2746365	Genus_GCA-2746365	446	Yes
asm_GCA_003646175_1.LargeContigs	79.5	3.52	8783141	1343	7669	35.2	No	0	0	0	Medium-Quality	MAG	Bacteria	Pseudomonadota	Gammaproteobacteria	Beggiatoales	Beggiatoaceae	UBA10656	UBA10656 sp003646175	311	Yes
asm_GCA_003646195_1.LargeContigs	51.24	2.28	1299739	314	4168	35.6	No	0	0	0	Medium-Quality	MAG	Bacteria	Pseudomonadota	Gammaproteobacteria	Nitrosococcales	Methylophagaceae	GCA-002733105	Genus_GCA-002733105	442	Yes
asm_GCA_003646205_1.LargeContigs	71.23	1.89	1795922	401	4547	36	No	0	0	0	Medium-Quality	MAG	Bacteria	Pseudomonadota	Gammaproteobacteria	Nitrosococcales	Methylophagaceae	GCA-002733105	GCA-002733105 sp003645385	441	No
asm_GCA_003646245_1.LargeContigs	58.02	4.8	1596029	414	3688	36.5	No	0	0	2	Medium-Quality	MAG	Bacteria	Pseudomonadota	Gammaproteobacteria	UBA9214	UBA9214	UBA9214	Genus_UBA9214	479	Yes
asm_GCA_003646255_1.LargeContigs	81.67	2.44	2439771	400	7189	37.1	Yes	1	0	1	Medium-Quality	MAG	Bacteria	Pseudomonadota	Gammaproteobacteria	Immundisolibacterales	Immundisolibacteraceae	QNFC01	QNFC01 sp003645395	462	No
asm_GCA_003646285_1.LargeContigs	58.54	2.82	2030676	418	5170	38.1	No	0	0	0	Medium-Quality	MAG	Bacteria	Pseudomonadota	Gammaproteobacteria	Methylococcales	UBA2780	UBA2780	UBA2780 sp003646305	1364	No
asm_GCA_003646295_1.LargeContigs	73.93	8.19	3166005	674	4829	35.2	No	0	0	0	Medium-Quality	MAG	Bacteria	Pseudomonadota	Gammaproteobacteria	Methylococcales	Methylomonadaceae	Methyloprofundus	Genus_Methyloprofundus	1255	Yes
asm_GCA_003646305_1.LargeContigs	89.56	3	2448423	350	8692	38.4	No	0	0	0	Medium-Quality	MAG	Bacteria	Pseudomonadota	Gammaproteobacteria	Methylococcales	UBA2780	UBA2780	UBA2780 sp003646305	1364	Yes
asm_GCA_003646345_1.LargeContigs	83.52	9.18	4361549	531	12061	36.2	No	0	0	0	Medium-Quality	MAG	Bacteria	Pseudomonadota	Gammaproteobacteria	Woeseiales	Woeseiaceae	SZUA-117	Genus_SZUA-117	809	Yes
asm_GCA_003646355_1.LargeContigs	54.33	0.56	1993295	414	5108	37	No	0	0	1	Medium-Quality	MAG	Bacteria	Pseudomonadota	Gammaproteobacteria	Pseudomonadales	Porticoccaceae	50-400-T64	50-400-T64 sp003646355	1407	Yes
asm_GCA_003646365_1.LargeContigs	91.17	6.85	5741244	869	8245	37.4	No	0	0	0	Medium-Quality	MAG	Bacteria	Pseudomonadota	Gammaproteobacteria	Pseudomonadales	Porticoccaceae	HB2-32-21	HB2-32-21 sp003645535	463	No
asm_GCA_003646405_1.LargeContigs	91.06	7.97	2898917	279	18239	37.3	No	0	0	0	Medium-Quality	MAG	Bacteria	Pseudomonadota	Gammaproteobacteria	Pseudomonadales	Halieaceae	Halioglobus	Halioglobus sp003646405	1362	Yes
asm_GCA_003646415_1.LargeContigs	85.5	3.88	2934276	367	12154	37.5	No	0	0	0	Medium-Quality	MAG	Bacteria	Pseudomonadota	Gammaproteobacteria	Pseudomonadales	Halieaceae	Halioglobus	Halioglobus sp003646415	1363	Yes
asm_GCA_003646445_1.LargeContigs	52.32	3.02	1890675	418	4523	37.5	No	0	0	0	Medium-Quality	MAG	Bacteria	Pseudomonadota	Gammaproteobacteria	Pseudomonadales	Halieaceae	Halioglobus	Halioglobus sp003646415	1363	No
asm_GCA_003646455_1.LargeContigs	89.88	9.49	3073478	397	11380	37.3	No	0	0	0	Medium-Quality	MAG	Bacteria	Pseudomonadota	Gammaproteobacteria	Pseudomonadales	Halieaceae	Halioglobus	Halioglobus sp003646405	1362	No
asm_GCA_003646505_1.LargeContigs	79.34	2.66	1457682	142	10849	35.9	No	0	0	0	Medium-Quality	MAG	Bacteria	Campylobacterota	Campylobacteria	Campylobacterales	Sulfurovaceae	Sulfurovum	Sulfurovum sp003646505	2244	Yes
asm_GCA_003646525_1.LargeContigs	71.51	3.52	2079481	429	5133	36.8	No	0	0	0	Medium-Quality	MAG	Bacteria	Campylobacterota	Campylobacteria	Campylobacterales	Sulfurovaceae	SZUA-451	SZUA-451 sp003646525	2246	Yes
asm_GCA_003646535_1.LargeContigs	70.86	8.13	4666509	619	7080	34.8	No	0	0	0	Medium-Quality	MAG	Bacteria	Campylobacterota	Campylobacteria	Campylobacterales	Arcobacteraceae	Family_Arcobacteraceae	Family_Arcobacteraceae	2227	Yes
asm_GCA_003646545_1.LargeContigs	55.77	5.54	1503413	334	4524	43.4	No	0	1	0	Medium-Quality	MAG	Bacteria	Desulfobacterota_F	B13-G15	B13-G15	B13-G15	B13-G15	Genus_B13-G15	869	Yes
asm_GCA_003646585_1.LargeContigs	64.07	0.41	1393455	284	5360	45.9	No	0	2	0	Medium-Quality	MAG	Bacteria	Desulfobacterota_F	B13-G15	B13-G15	B13-G15	B73-G16	B73-G16 sp003646585	882	Yes
asm_GCA_003646595_1.LargeContigs	57.92	2.19	1368346	321	4307	45.3	No	0	0	0	Medium-Quality	MAG	Bacteria	Desulfobacterota_F	B13-G15	B13-G15	B13-G15	Family_B13-G15	Family_B13-G15	868	No
asm_GCA_003646625_1.LargeContigs	50.05	1.94	1437839	169	9230	42.5	No	0	0	2	Medium-Quality	MAG	Bacteria	Desulfobacterota_F	JAFDIG01	JAFDIG01	JAFDIG01	JAFDIG01	JAFDIG01 sp019308145	2012	Yes
asm_GCA_003646645_1.LargeContigs	73.65	6.25	1704636	488	3483	44.5	Yes	1	0	2	Medium-Quality	MAG	Bacteria	Desulfobacterota_F	B13-G15	B13-G15	B13-G15	B13-G15	B13-G15 sp003646705	867	No
asm_GCA_003646655_1.LargeContigs	73.64	6.71	4230981	1015	4615	41.6	Yes	1	1	0	Medium-Quality	MAG	Bacteria	Desulfobacterota	Syntrophobacteria	B119-G9	B119-G9	B119-G9	B119-G9 sp003646715	271	No
asm_GCA_003646665_1.LargeContigs	53.71	0.84	1063757	251	4258	44.8	No	0	0	0	Medium-Quality	MAG	Bacteria	Desulfobacterota_F	B13-G15	B13-G15	B13-G15	Family_B13-G15	Family_B13-G15	868	Yes
asm_GCA_003646705_1.LargeContigs	69.96	2.57	1384932	270	5765	45	Yes	1	0	0	Medium-Quality	MAG	Bacteria	Desulfobacterota_F	B13-G15	B13-G15	B13-G15	B13-G15	B13-G15 sp003646705	867	Yes
asm_GCA_003646715_1.LargeContigs	61.51	1.66	2737211	559	5081	41.4	No	0	1	1	Medium-Quality	MAG	Bacteria	Desulfobacterota	Syntrophobacteria	B119-G9	B119-G9	B119-G9	B119-G9 sp003646715	271	Yes
asm_GCA_003646745_1.LargeContigs	79.78	1.47	1780405	278	7761	44.9	No	0	0	0	Medium-Quality	MAG	Bacteria	Desulfobacterota_F	B13-G15	B13-G15	RBG-16-54-18	B11-G15	B11-G15 sp003646745	866	Yes
asm_GCA_003646755_1.LargeContigs	55.19	5.17	1239214	316	4058	42.9	No	0	0	0	Medium-Quality	MAG	Bacteria	Desulfobacterota	DSM-4660	Desulfatiglandales	Desulfatiglandaceae	Family_Desulfatiglandaceae	Family_Desulfatiglandaceae	2058	Yes
asm_GCA_003646785_1.LargeContigs	65.08	2.76	1655572	366	4664	44.4	No	0	0	3	Medium-Quality	MAG	Bacteria	Desulfobacterota	DSM-4660	Desulfatiglandales	Desulfatiglandaceae	Family_Desulfatiglandaceae	Family_Desulfatiglandaceae	406	Yes
asm_GCA_003646795_1.LargeContigs	73.8	3.06	2626793	556	5165	42.1	No	0	0	0	Medium-Quality	MAG	Bacteria	Desulfobacterota	DSM-4660	Desulfatiglandales	Desulfatiglandaceae	B111-G9	B111-G9 sp003646865	284	No
asm_GCA_003646815_1.LargeContigs	95.71	7.19	3465865	410	11834	41.8	Yes	1	0	1	Medium-Quality	MAG	Bacteria	Desulfobacterota	DSM-4660	Desulfatiglandales	Desulfatiglandaceae	B46-G9	B46-G9 sp003646815	289	Yes
asm_GCA_003646845_1.LargeContigs	55.73	1.65	1364796	338	3990	41.4	No	0	1	1	Medium-Quality	MAG	Bacteria	Desulfobacterota	DSM-4660	Desulfatiglandales	B25-G16	B33-G16	B33-G16 sp003646875	280	No
asm_GCA_003646865_1.LargeContigs	81.29	0.65	2467247	349	8477	42.3	No	0	0	0	Medium-Quality	MAG	Bacteria	Desulfobacterota	DSM-4660	Desulfatiglandales	Desulfatiglandaceae	B111-G9	B111-G9 sp003646865	284	Yes
asm_GCA_003646875_1.LargeContigs	84.82	0.67	2201702	384	6346	41.5	No	0	0	1	Medium-Quality	MAG	Bacteria	Desulfobacterota	DSM-4660	Desulfatiglandales	B25-G16	B33-G16	B33-G16 sp003646875	280	Yes
asm_GCA_003646895_1.LargeContigs	64.13	2.09	1939945	460	4379	41.8	No	0	0	1	Medium-Quality	MAG	Bacteria	Desulfobacterota	DSM-4660	Desulfatiglandales	Desulfatiglandaceae	B111-G9	Genus_B111-G9	2183	Yes
asm_GCA_003646925_1.LargeContigs	63.97	7.31	1546414	407	3745	42.4	No	0	0	0	Medium-Quality	MAG	Bacteria	Desulfobacterota	DSM-4660	Desulfatiglandales	B25-G16	B33-G16	Genus_B33-G16	281	No
asm_GCA_003646935_1.LargeContigs	79.8	1.35	2380398	429	6170	41.7	No	0	0	0	Medium-Quality	MAG	Bacteria	Desulfobacterota	DSM-4660	Desulfatiglandales	B25-G16	B25-G16	B25-G16 sp003646935	261	Yes
asm_GCA_003646955_1.LargeContigs	91.61	9.14	3642536	538	8690	42.6	No	0	0	0	Medium-Quality	MAG	Bacteria	Desulfobacterota	DSM-4660	Desulfatiglandales	HGW-15	JAFDEF01	JAFDEF01 sp019310485	292	Yes
asm_GCA_003646975_1.LargeContigs	81.7	0.65	3251324	554	6686	42.1	No	0	0	0	Medium-Quality	MAG	Bacteria	Desulfobacterota	DSM-4660	Desulfatiglandales	Desulfatiglandaceae	B17-G16	B17-G16 sp003646975	290	Yes
asm_GCA_003646995_1.LargeContigs	88.39	6.33	3849174	542	9359	42.1	No	0	1	1	Medium-Quality	MAG	Bacteria	Desulfobacterota	DSM-4660	Desulfatiglandales	Desulfatiglandaceae	B111-G9	B111-G9 sp003646995	285	Yes
asm_GCA_003647025_1.LargeContigs	62.22	4.52	3061178	345	8963	37.1	No	0	0	0	Medium-Quality	MAG	Bacteria	Myxococcota	Polyangia	Polyangiales	SG8-38	SG8-38	SG8-38 sp019313915	736	Yes
asm_GCA_003647035_1.LargeContigs	88.89	2.58	3518506	570	7322	37.1	No	0	0	0	Medium-Quality	MAG	Bacteria	Myxococcota	Polyangia	Polyangiales	SG8-38	SG8-38	SG8-38 sp003647035	737	Yes
asm_GCA_003647065_1.LargeContigs	80.63	2.76	7075969	594	13363	38.5	No	0	0	1	Medium-Quality	MAG	Bacteria	Myxococcota	Polyangia	Polyangiales	SG8-38	B10-G4	B10-G4 sp003647065	552	Yes
asm_GCA_003647075_1.LargeContigs	63	3.55	6068116	1298	4848	38.6	No	0	0	1	Medium-Quality	MAG	Bacteria	Myxococcota	Polyangia	Polyangiales	Polyangiaceae	Family_Polyangiaceae	Family_Polyangiaceae	1125	Yes
asm_GCA_003647095_1.LargeContigs	61.23	0.32	3404290	325	11707	42.4	No	0	0	0	Medium-Quality	MAG	Bacteria	Myxococcota	B64-G9	B64-G9	B64-G9	B64-G9	B64-G9 sp003647095	1120	Yes
[truncated: 2,282 more rows]

## Sheet: Table S4
Table S4. Quality assembly metrics
[truncated: 3,335 more rows]

## Sheet: rm Table S5
Table S5. GTDB taxonomy Genomes' annotation
[truncated: 3,335 more rows]
